# Supplementary material for: Improving community pharmacists’ clinical knowledge to detect and resolve drug-related problems in Croatia: a before/after survey study investigating the efficacy of an educational intervention
Source: PubMed Central journal article supplement — BMJ Open. 2020 Jun 1;10(6):e034674. doi: 10.1136/bmjopen-2019-034674 (PMC7265009; doi:10.1136/bmjopen-2019-034674), 2020-06-01
Supplement: bmjopen-2019-034674.draft_revisions.pdf [file bmjopen-2019-034674.draft_revisions.pdf]

# BMJ Open

BMJ Open is committed to open peer review. As part of this commitment we make the peer review history of every article we publish publicly available.

When an article is published we post the peer reviewers' comments and the authors' responses online. We also post the versions of the paper that were used during peer review. These are the versions that the peer review comments apply to.

The versions of the paper that follow are the versions that were submitted during the peer review process. They are not the versions of record or the final published versions. They should not be cited or distributed as the published version of this manuscript.

BMJ Open is an open access journal and the full, final, typeset and author-corrected version of record of the manuscript is available on our site with no access controls, subscription charges or pay-per-view fees (<http://bmjopen.bmj.com>).

If you have any questions on BMJ Open's open peer review process please email [info.bmjopen@bmj.com](mailto:info.bmjopen@bmj.com)

# BMJ Open

## Improving community pharmacists' clinical knowledge to detect and resolve drug-related problems in Croatia: a before/after survey study investigating the impact of an educational intervention

|                               |                                                                                                                                                                                                                                                                                                                                                                                                                                                                                                                                                                                                                                        |
|-------------------------------|----------------------------------------------------------------------------------------------------------------------------------------------------------------------------------------------------------------------------------------------------------------------------------------------------------------------------------------------------------------------------------------------------------------------------------------------------------------------------------------------------------------------------------------------------------------------------------------------------------------------------------------|
| Journal:                      | <i>BMJ Open</i>                                                                                                                                                                                                                                                                                                                                                                                                                                                                                                                                                                                                                        |
| Manuscript ID                 | bmjopen-2019-034674                                                                                                                                                                                                                                                                                                                                                                                                                                                                                                                                                                                                                    |
| Article Type:                 | Original research                                                                                                                                                                                                                                                                                                                                                                                                                                                                                                                                                                                                                      |
| Date Submitted by the Author: | 01-Oct-2019                                                                                                                                                                                                                                                                                                                                                                                                                                                                                                                                                                                                                            |
| Complete List of Authors:     | Zekan, Lovre; Split-Dalmatia County Pharmacy; University of Split School of Medicine, Department of Pharmacy<br>Mestrovic, Arijana; University of Split School of Medicine, Department of Pharmacy; Pharmaexpert LLC<br>Perisin, Ana; University of Split School of Medicine, Department of Pharmacy<br>Bukic, Josipa; University of Split School of Medicine, Department of Pharmacy<br>Leskur, Dario; University of Split School of Medicine, Department of Pharmacy<br>Rusic, Doris; University of Split School of Medicine, Department of Pharmacy<br>Modun, Darko; University of Split School of Medicine, Department of Pharmacy |
| Keywords:                     | EDUCATION & TRAINING (see Medical Education & Training), THERAPEUTICS, PRIMARY CARE                                                                                                                                                                                                                                                                                                                                                                                                                                                                                                                                                    |
|                               |                                                                                                                                                                                                                                                                                                                                                                                                                                                                                                                                                                                                                                        |

SCHOLARONE™  
Manuscripts

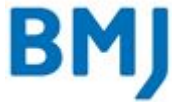

I, the Submitting Author has the right to grant and does grant on behalf of all authors of the Work (as defined in the below author licence), an exclusive licence and/or a non-exclusive licence for contributions from authors who are: i) UK Crown employees; ii) where BMJ has agreed a CC-BY licence shall apply, and/or iii) in accordance with the terms applicable for US Federal Government officers or employees acting as part of their official duties; on a worldwide, perpetual, irrevocable, royalty-free basis to BMJ Publishing Group Ltd ("BMJ") its licensees and where the relevant Journal is co-owned by BMJ to the co-owners of the Journal, to publish the Work in this journal and any other BMJ products and to exploit all rights, as set out in our [licence](#).

The Submitting Author accepts and understands that any supply made under these terms is made by BMJ to the Submitting Author unless you are acting as an employee on behalf of your employer or a postgraduate student of an affiliated institution which is paying any applicable article publishing charge ("APC") for Open Access articles. Where the Submitting Author wishes to make the Work available on an Open Access basis (and intends to pay the relevant APC), the terms of reuse of such Open Access shall be governed by a Creative Commons licence – details of these licences and which [Creative Commons](#) licence will apply to this Work are set out in our licence referred to above.

Other than as permitted in any relevant BMJ Author's Self Archiving Policies, I confirm this Work has not been accepted for publication elsewhere, is not being considered for publication elsewhere and does not duplicate material already published. I confirm all authors consent to publication of this Work and authorise the granting of this licence.

1  
2  
3 **1 Improving community pharmacists' clinical knowledge to detect and resolve**  
4  
5  
6 **2 drug-related problems in Croatia: a before/after survey study investigating**  
7  
8  
9 **3 the impact of an educational intervention**  
10  
11  
12 **4**

13 Lovre Zekan<sup>1,2</sup>, Arijana Mestrovic<sup>2,3</sup>, Ana Seselja Perisin<sup>2</sup>, Josipa Bukic<sup>2</sup>, Dario Leskur<sup>2</sup>, Doris  
14  
15  
16 Rusic<sup>2</sup>, Darko Modun<sup>2\*</sup>  
17  
18  
19

20  
21 <sup>1</sup>Split-Dalmatia County Pharmacy, Split, Croatia  
22

23 <sup>2</sup>Department of Pharmacy, University of Split School of Medicine, Split, Croatia  
24

25 <sup>3</sup>Pharmaexpert LLC, Zagreb, Croatia  
26  
27  
28  
29  
30

31 \*Corresponding author:  
32

33 Darko Modun  
34

35 Department of Pharmacy  
36  
37

38 University of Split School of Medicine  
39

40 Soltanska 2, 21000 Split  
41

42 Croatia  
43

44  
45 Phone: +38521557851, Fax: +38521557895, E-mail: [dmodun@mefst.hr](mailto:dmodun@mefst.hr)  
46  
47  
48

49 **Word count: 2702**  
50  
51  
52  
53  
54  
55  
56  
57  
58  
59  
60

## Abstract

**Objectives:** Drug-related problems (DRPs) represent a public health problem, both in terms of patient outcomes and healthcare expenditures. In order to prevent and resolve these problems, pharmacists should also have adequate clinical knowledge. However, since majority of today's practicing community pharmacists in Croatia did not attend courses on clinical pharmacy and pharmacotherapy, there seems to be a lack of clinical knowledge about DRPs.

**Design:** Before/after survey study.

**Setting:** University of Split School of Medicine.

**Participants:** 115 community pharmacists from all over the Croatia.

**Interventions:** An interactive three-day clinical pharmacy workshop with the goal of increasing the knowledge level of community pharmacists in Croatia to identify and resolve DRPs in routine practice. Teaching methods were based on interactive clinical case solving.

**Outcome measure:** Pre- and post-workshop survey-based clinical knowledge measurement tool was used in order to evaluate the effectiveness of the workshop. The lowest possible total score was 0 and the highest was 80. A higher survey score indicates a higher level of clinical knowledge to identify and resolve DRPs.

**Results:** Participating pharmacists had significantly higher post-workshop mean survey score than the pre-workshop mean survey score (mean 6.2; 95% CI: 4.3 to 8.1). Furthermore, it was found that community pharmacists significantly increased their survey scores, regardless of their age. **Conclusions:** Interactive and case-based clinical pharmacy workshop could be a valuable tool to increase the knowledge of community pharmacists about identification and management of DRPs in routine practice, especially if there is a lack of previous training or education.

1  
2  
3 45 However, further studies are necessary to evaluate the long-term knowledge maintenance and the  
4  
5 46 improvement in patients' clinical outcomes.  
6  
7  
8 47

## 11 **Article Summary**

### 12 **Strengths and limitations of this study**

- 13 49  
14 50  
15 51  
16 52  
17 53  
18 54  
19 55  
20 56  
21 57  
22 58  
23 59  
24 60  
25 61  
26 62  
27 63  
28 64  
29 65  
30 66  
31 67  
32  
33  
34  
35  
36  
37  
38  
39  
40  
41  
42  
43  
44  
45  
46  
47  
48  
49  
50  
51  
52  
53  
54  
55  
56  
57  
58  
59  
60
- This study included 115 community pharmacists from all over the country, and out of them 88 completed the survey both times (response rate 76,5%), which is about 4% of all community pharmacists in Croatia.
  - Educational intervention was interactive and case-based, and survey-based clinical knowledge measurement tool was validated previously and successfully used in Australia.
  - Follow-up evaluations are needed in order to evaluate the long-term effectiveness of the educational intervention.
  - The participation was voluntary and this could compromise the representativeness of the sample.

## 61 **Introduction**

62 Drug-related problems (DRPs) represent a public health problem, both in terms of patient  
63 outcomes and healthcare expenditures, as they can ultimately lead to drug-related complications,  
64 such as drug-related morbidity or mortality. Community pharmacists, as contributors to patient  
65 care, should assess data concerning untoward effects of drugs and be well skilled to recognize  
66 and prevent these drug-related complications, which result from unidentified or unresolved  
67 DRPs.<sup>1 2</sup> The pharmaceutical care concept, as one of the pillars of modern pharmacy services,

1  
2  
3 68 assumes clinical interventions which lead to optimal health outcomes. Identification, prevention  
4  
5 69 or resolution of DRPs improves patient's health outcomes, and therefore it should be integrated  
6  
7  
8 70 within pharmaceutical care.<sup>3,4</sup> However, in order to identify and resolve DRPs, community  
9  
10 71 pharmacists must have both the extensive clinical knowledge about them and the sufficient  
11  
12 72 training to detect them. Therefore knowledge, along with clinical skills are important  
13  
14  
15 73 prerequisites to efficiently provide pharmaceutical care.<sup>5-9</sup>  
16  
17

18 74 In our previous study, it was suggested that the additional education of community pharmacists  
19  
20 75 in Croatia is associated with the higher level of clinical knowledge to detect and resolve DRPs ( $\beta$   
21  
22 76 = 0.272,  $P < 0.001$ ).<sup>10</sup> It was concluded that the additional education could increase the  
23  
24  
25 77 community pharmacists' knowledge level and thus probably make pharmaceutical care  
26  
27 78 implementation more effective. Furthermore, using the same knowledge measurement tool, it  
28  
29  
30 79 was found that community pharmacists from Australia compared to the colleagues from Croatia  
31  
32 80 seem to have a higher level of clinical knowledge to detect and resolve DRPs. This finding  
33  
34 81 indicated a general need for the improvement in the knowledge level of community pharmacists  
35  
36 82 in Croatia. This was not an unexpected finding, since clinical pharmacy and pharmaceutical care  
37  
38  
39 83 models are still in the initial stages of development in Croatia. First clinical pharmacy courses  
40  
41 84 were introduced to the pharmacy curricula in 2004. Consequently, the majority of today's  
42  
43 85 practicing community pharmacists did not attend courses on these disciplines as a part of their  
44  
45  
46 86 graduate education due to the unavailability of such courses.<sup>11</sup>  
47  
48

49 87 Previously, Mestrovic et al. also identified that community pharmacists in Croatia lack skills in  
50  
51 88 the areas of monitoring drug therapy, patient consultation and the evaluation of outcomes, and  
52  
53  
54  
55  
56  
57  
58  
59  
60

1  
2  
3 89 that they believe they need to complete supplemental educational programs to be able to  
4  
5 90 efficiently provide pharmaceutical care.<sup>12</sup>  
6  
7

8  
9 91 A short continuing education program could be used to fill the gap in community pharmacists'  
10  
11 92 knowledge, and facilitate provision of advanced pharmaceutical care in a primary care setting.<sup>13</sup>  
12  
13 93 Also, such an intervention could consequently lead to a reduced number of DRPs, presumably  
14  
15 94 improve patients' health outcomes and reduce healthcare expenditures.  
16  
17

18  
19 95 Hence, we planned an educational intervention with the goal of improving the clinical  
20  
21 96 knowledge level of community pharmacists in Croatia. Highly interactive and multifaceted  
22  
23 97 learning methods, such as workshops are reported to be highly effective strategies to improve  
24  
25 98 knowledge, professional practice and healthcare outcomes.<sup>14-17</sup> Furthermore, continuing  
26  
27 99 education programs in the form of an educational workshop have shown to improve community  
28  
29 100 pharmacists' knowledge and clinical skills in practice.<sup>5 11 13 18 19</sup> Accordingly, an interactive  
30  
31 101 educational workshop should be an effective short-term strategy to fill the gap in community  
32  
33 102 pharmacists' knowledge about DRPs.  
34  
35  
36  
37

## 38 39 **Methods**

40  
41 104 A three-day clinical pharmacy workshop for community pharmacists in Croatia was organized.  
42  
43 105 Workshop was advertised nationwide, with the help of Croatian Chamber of Pharmacists and  
44  
45 106 Croatian Pharmaceutical Society. Participation was voluntary and community pharmacists from  
46  
47 107 all over Croatia participated. The workshop lasted for a total of 20 hours, and during that time  
48  
49 108 various topics in the area of clinical pharmacy and pharmacotherapy were discussed. Included  
50  
51 109 topics were pharmaceutical care in practice, DRPs, routine laboratory tests, food and drug  
52  
53 110 interactions, pharmacokinetic and pharmacodynamic interactions, hormone therapy,  
54  
55  
56  
57  
58  
59



1  
2  
3 111 dyslipidemia and diabetes, antimicrobial drugs, psychotropic drugs and antidepressants,  
4  
5 112 hypertension and anticoagulants, narrow therapeutic index drugs, rare diseases, medication errors  
6  
7  
8 113 and evidence-based medicine.  
9

10  
11 114 A pharmacist and a pharmacologist, both highly qualified and experienced in their respective  
12  
13 115 fields, prepared and presented workshop materials and discussions. Key elements of an effective  
14  
15 116 educational activity, like formal lectures and interactive clinical case solving and exercises, were  
16  
17  
18 117 incorporated into the program. The workshop was designed to provide a brief overview about  
19  
20 118 each topic, but then clinical cases were solved and discussed for the most of the workshop time.  
21  
22  
23 119 Cases were prepared according to the clinical case models available in the literature.<sup>20 21</sup> By  
24  
25 120 lifting the letter card, each participant had to answer for which of the 4 statements in each case  
26  
27 121 he thinks is the most correct. After all participants had revealed their answers, discussion on each  
28  
29 122 statement followed. Participants were also invited to present a few of their own cases from  
30  
31 123 routine practice. From 150 clinical cases, one of the most important learning objectives was  
32  
33 124 increasing the knowledge through the identification and resolution of DRPs in the presented  
34  
35 125 cases.  
36  
37  
38  
39

40 126 In order to assess the level of the clinical knowledge of participating community pharmacists  
41  
42 127 pre- and post-workshop, we used a validated survey-based clinical knowledge measurement tool  
43  
44 128 developed by Williams et al.<sup>22</sup> The survey was structured on nine clinical cases with a total of 40  
45  
46 129 statements. Clinical cases were based on scenarios that were found to occur frequently in  
47  
48 130 community pharmacies in Australia. Each clinical case was supposed to assess a pharmacist's  
49  
50 131 ability to identify, resolve and evaluate a DRP. The survey was composed in a manner that all  
51  
52 132 participants were asked to read short case scenarios and select how relevant, likely or appropriate  
53  
54  
55  
56  
57  
58  
59  
60

1  
2  
3 133 they found each of the proposed statements using a seven-point Likert scale. In the first three  
4  
5 134 clinical cases each statement was about additional information that would be relevant to acquire  
6  
7  
8 135 for that case, while the next three cases consisted of statements which described potential DRPs  
9  
10 136 in each case and the final three cases consisted of statements about possible recommendations for  
11  
12 137 the patients. Furthermore, the same tool was used in a cross-sectional study with the aim of  
13  
14 138 determining the clinical knowledge level of community pharmacists in Croatia to identify,  
15  
16  
17 139 evaluate and resolve DRPs, as it was previously reported.<sup>10</sup>  
18  
19

20 140 All participating community pharmacists were invited on-site to independently complete the  
21  
22 141 survey twice: at the beginning of the workshop and three days later at the end of the last session  
23  
24 142 of the workshop. Participating pharmacists were supervised to complete the survey  
25  
26  
27 143 independently and without access to additional resources or literature. The survey was  
28  
29 144 anonymous, providing only the participant's age, gender and a simple code to match the  
30  
31 145 participants' results before and after the workshop. Study size calculation was not applicable  
32  
33 146 because survey score difference which is associated with significant changes in routine practice  
34  
35  
36 147 is still not known. Therefore, all participating pharmacists were included in this study, except  
37  
38 148 pharmacists who participated in the previous nationwide cross-sectional study, which was the  
39  
40 149 only exclusion criteria.<sup>10</sup>  
41  
42  
43

44 150 Afterwards, all data were collected in a Microsoft Excel® worksheet (version 15, Redmond,  
45  
46 151 WA, USA) and each completed survey was evaluated and scored. All statements were scored  
47  
48 152 individually and each statement received a score of 2, 1 or 0 depending how far away the answer  
49  
50 153 was from the correct answer. The lowest possible total score was 0 and the maximum possible  
51  
52  
53  
54  
55  
56  
57  
58  
59  
60

1  
2  
3 154 80. A higher score indicates a higher level of clinical knowledge to detect, evaluate and resolve  
4  
5 155 DRPs, as previously described.<sup>22</sup>  
6  
7  
8  
9 156 Statistical calculations and analyses of the data were performed using the IBM SPSS ® statistical  
10  
11 157 package (version 20, Armonk, NY, USA). The graphical figure was prepared with the GraphPad  
12  
13 158 Prism software (version 6, La Jolla, CA, USA). Mean scores of the study participants were  
14  
15 159 analyzed with the independent samples and paired samples *t*-test. Normality of data was checked  
16  
17 160 with the Kolmogorov-Smirnov and the Shapiro-Wilk tests. Pearson's correlation was used to  
18  
19 161 correlate pharmacist's score with age. For all tests, a  $P < 0.05$  was considered to be statistically  
20  
21 162 significant. All values are presented as mean  $\pm$  SD.  
22  
23  
24  
25

26 163 Primary research outcome was the change of the community pharmacists' knowledge based on  
27  
28 164 pre- and post-workshop evaluation. In addition, age and gender subgroup analysis was  
29  
30 165 performed. This study was approved by the University of Split School of Medicine Ethics  
31  
32 166 Committee (003-08/15-03/0001) and each participant consented verbally to participate in the  
33  
34 167 study, as approved by the Ethics Committee. Verbal consent was considered to be appropriate  
35  
36 168 because of the favorable risk/benefit ratio for the participants. The intervention was educational  
37  
38 169 and the assessment tool was the written survey so there were no particular risks for the study  
39  
40 170 participants.  
41  
42  
43  
44

#### 45 171 Patient and public involvement

46  
47  
48  
49 172 No patients were involved in the design, recruitment and conduct of the study. The study  
50  
51 173 participants voluntarily accepted to participate in this study, and they were familiarized with all  
52  
53 174 the risks and benefits. They accepted the possibility that results of the study could be published.  
54  
55  
56  
57  
58  
59  
60

## 175 Results

176 Totally, 115 community pharmacists attended the workshop, and out of them, 88 completed the  
 177 survey both times. This represents about 4% of all community pharmacists in Croatia.<sup>23</sup> The  
 178 response rate, as shown in Table 1, was satisfactory because participation was voluntary and  
 179 some participants dropped out before the end of the workshop. Matching method with the simple  
 180 code was effective, which resulted in the successful matching of study participants for further  
 181 data extraction and evaluation.

182 Table 1. Demographics of the matched study participants

|                     | <b>Community<br/>pharmacists</b> |
|---------------------|----------------------------------|
| Age (mean $\pm$ SD) | 36.6 $\pm$ 9.2                   |
| Female (%)          | 90.9                             |
| Male (%)            | 9.1                              |
| Response rate (%)   | 76.5                             |

183 Participating pharmacists had a pre-workshop mean score of  $42.9 \pm 8.2$ , and post-workshop  
 184 mean score of  $49.1 \pm 8.0$ , as presented in Fig 1. The mean score difference of  $6.2 \pm 9.0$ , which  
 185 represents a 14.5% relative increase, was found to be significant with the paired samples *t*-test  
 186 ( $t(87) = 6.488, P < 0.001$ ).

187 Fig 1. Pre- and post- workshop survey scores of participating community pharmacists by age and  
 188 gender subgroups

189 (Figure 1)

1  
2  
3 190 Furthermore, male pharmacists had a pre-workshop mean score of  $42.6 \pm 4.2$ , while female  
4  
5 191 pharmacists had a pre-workshop mean score of  $42.9 \pm 8.5$ , with no significant difference  
6  
7  
8 192 between the scores with the independent samples *t*-test ( $t(86) = -0.09, P = 0.93$ ). However, after  
9  
10 193 the workshop only female pharmacists significantly increased their mean score (paired samples *t*-  
11  
12 194 test,  $t(79) = 6.744, P < 0.001$ ), with the mean score difference of  $6.9 \pm 9.1$ .

15  
16 195 Pharmacists in both age subgroups significantly increased their mean scores after the workshop  
17  
18 196 (paired samples *t*-test,  $t(47) = 4.786, t(39) = 4.342, P < 0.001$ ) with nearly the same  
19  
20 197 improvement, as presented in Fig 1. Interestingly, there was no significant difference in the  
21  
22  
23 198 survey scores between age subgroups and we found no correlation between pharmacists' survey  
24  
25 199 scores and their age (Pearson's  $r = 0.009, n = 88, P = 0.933$ ).

## 28 29 200 **Discussion**

30  
31 201 The intensive three-day educational workshop on clinical pharmacy seemed to significantly  
32  
33 202 increase the clinical knowledge of community pharmacists in Croatia to detect and resolve  
34  
35  
36 203 DRPs. This finding implies that a short and intensive case-based educational intervention could  
37  
38 204 potentially fill the gap in community pharmacists' knowledge about DRPs.

39  
40  
41  
42 205 To evaluate the true relevance of these findings for community pharmacy practice, it is still  
43  
44 206 necessary to find out if the increased clinical knowledge level of community pharmacists will  
45  
46 207 result in an increased level of clinical interventions about DRPs in daily practice. For example,  
47  
48  
49 208 one of the clear indicators would be the number of reported adverse drug reactions or  
50  
51 209 documented clinical interventions in this group of pharmacists. If confirmed, these findings  
52  
53 210 could have an important implication for pharmacists' continuing education about DRPs.

1  
2  
3 211 From similar studies, Currie et al. proved that the intensive educational program in  
4  
5 212 pharmaceutical care skills and implementation of these skills in practice successfully increased  
6  
7 213 the rate of identified DRPs.<sup>24</sup> Kimberlin et al. reported that pharmacists who engaged in an  
8  
9 214 educational intervention program more likely assessed DRPs than pharmacists without the  
10  
11 215 educational intervention and this difference held in the 3-month follow-up period.<sup>25</sup> Furthermore,  
12  
13 216 recently Lalonde et al. demonstrated that having provided community pharmacists with a short  
14  
15 217 disease-specific training and essential clinical information successfully increased pharmacists'  
16  
17 218 knowledge and clinical skills as well as reduced DRP frequency in community pharmacy  
18  
19 219 practice.<sup>26</sup>

20  
21  
22  
23  
24  
25 220 Interestingly, this study also implies that community pharmacists' age does not correlate with  
26  
27 221 their clinical knowledge of detecting and resolving DRPs, while Mestrovic et al. study in the  
28  
29 222 community pharmacy setting in Croatia revealed that the age of participants, presumably through  
30  
31 223 experience, improved competency for recognizing and identifying DRPs.<sup>11</sup> However, the two  
32  
33 224 studies used different tools to assess the pharmacist's ability to manage DRPs, and one study  
34  
35 225 primarily evaluated knowledge while the other study evaluated competency, which further  
36  
37 226 involves skills and attitudes of participants. This could be the reason for the different findings  
38  
39 227 between the studies, but further research is required in order to clarify this difference.  
40  
41  
42  
43

44 228 Furthermore, it was found that after the workshop only female pharmacists significantly  
45  
46 229 improved their clinical knowledge about DRPs, while male pharmacists retained the same level  
47  
48 230 of knowledge as before the workshop. This potentially could be due to a greater emphasis on  
49  
50 231 pharmaceutical care which as a topic could be more appealing to female pharmacists.<sup>27</sup> However,  
51  
52  
53  
54  
55  
56  
57  
58  
59  
60

1  
2  
3 232 this finding is questionable due to a small number of male participants (n = 8) and should be  
4  
5 233 further investigated.  
6  
7  
8

9 234 A major limitation of this study is the fact that post-workshop clinical knowledge scores were  
10  
11 235 evaluated only immediately after the workshop, so these results actually represent short term  
12  
13 236 knowledge gain and are therefore not reflective of any sustained improvement in knowledge.  
14  
15 237 However, patient benefits must be continuous and not limited to certain periods of time. As  
16  
17 238 expected, a majority of studies have also confirmed that training programs increase the  
18  
19 239 knowledge of pharmacists immediately after the educational intervention, and only a few studies  
20  
21 240 revealed that these improvements could be maintained for a year or even longer without any  
22  
23 241 further education.<sup>7 26</sup> Therefore, follow-up evaluations are needed and these results should be  
24  
25 242 supported by conducting a future survey to determine whether improvements were maintained  
26  
27 243 and to further evaluate the effectiveness of the educational intervention.<sup>28</sup>  
28  
29  
30  
31  
32

33 244 Another limitation is the possibility of overestimating the results to the general community  
34  
35 245 pharmacist population since the workshop participation was only voluntary. It is therefore  
36  
37 246 possible that only more motivated and enthusiastic pharmacists attended and thus had a greater  
38  
39 247 improvement in knowledge. However, since study participants were from all over the country  
40  
41 248 and represent both the small privately-owned pharmacies and the large pharmacy chains and  
42  
43 249 participants gender distribution is representative of Croatian community pharmacists population,  
44  
45 250 generalization of these results to the community pharmacy setting is much more applicable.<sup>23</sup>  
46  
47  
48  
49

50 251 Finally, this study once more confirms previously reported findings that educational  
51  
52 252 interventions through short workshops are a useful tool to successfully improve pharmacists'  
53  
54 253 knowledge on various topics in pharmacy practice.<sup>7 18 29 30</sup> Educational interventions can play a  
55  
56  
57  
58  
59  
60

1  
2  
3 254 vital role in expanding basic pharmacy education and enhancing pharmaceutical care  
4  
5 255 implementation, especially when insufficient training has been received during undergraduate or  
6  
7  
8 256 graduate studies.<sup>23</sup>  
9

## 10 11 257 **Conclusions**

12  
13  
14 258 The short interactive and intensive educational intervention through the three-day clinical  
15  
16 259 pharmacy workshop seems to improve the community pharmacists' knowledge to identify,  
17  
18 260 evaluate and resolve DRPs in a simulated routine practice setting. Therefore, short educational  
19  
20 261 interventions could be a valuable tool to fill the gap in pharmacist's knowledge about DRP  
21  
22 262 management, especially if there is a lack of previous training or education. Further studies are  
23  
24 263 necessary in order to evaluate long-term knowledge maintenance and the impact of these  
25  
26 264 findings in community pharmacy practice.  
27  
28  
29  
30

## 31 265 **Acknowledgements**

32  
33  
34  
35  
36 266 The authors are grateful to all participating community pharmacists for making this study  
37  
38 267 possible and to Shelly Pranic for proofreading this paper.  
39  
40  
41

## 42 268 **Competing Interests**

43  
44  
45  
46 269 Lovre Zekan is employed by Split-Dalmatia County Pharmacy and Arijana Mestrovic is  
47  
48 270 employed by Pharmaexpert LLC. The authors further declare that they have no competing  
49  
50 271 interests.  
51  
52  
53

## 54 272 **Funding**



273 This research received no specific grant from any funding agency in the public, commercial or  
274 not-for-profit sectors.

## 275 Author Contributions

276 DM was the leader of this research. LZ interpreted and analyzed the study data. LZ, AM and DM  
277 participated in the workshop preparation. ASP, JB, DL and DR participated in conducting the  
278 survey. All authors participated in preparation and approved the final manuscript.

279

## 280 References

- 281 1. Westerlund T, Marklund B. Assessment of the clinical and economic outcomes of pharmacy  
282 interventions in drug-related problems. *J Clin Pharm Ther* 2009;**34**(3):319-27.
- 283 2. Kovacevic SV, Miljkovic B, Culafic M, et al. Evaluation of drug-related problems in older  
284 polypharmacy primary care patients. *J Eval Clin Pract* 2017;**23**(4):860-65.
- 285 3. Allemann SS, van Mil JW, Botermann L, et al. Pharmaceutical care: the PCNE definition  
286 2013. *Int J Clin Pharm* 2014;**36**(3):544-55.
- 287 4. Cousins D, Kijlstra N, Walser S. Pharmaceutical Care – Policies and Practices for a Safer,  
288 More Responsible and Cost-effective Health System: European Directorate for the  
289 Quality of Medicines & HealthCare, EDQM, Council of Europe; 2012 [Available from:  
290 [https://www.edqm.eu/medias/fichiers/policies\\_and\\_practices\\_for\\_a\\_safer\\_more\\_responsibl.pdf](https://www.edqm.eu/medias/fichiers/policies_and_practices_for_a_safer_more_responsibl.pdf).  
291
- 292 5. Mehra IV, Wuller CA. Evaluation of a Pilot Clinical Skills Workshop Series for Community  
293 Pharmacists. *Am J Pharm Educ* 1998;**62**.
- 294 6. Bindoff I, Ling T, Bereznicki L, et al. A Computer Simulation of Community Pharmacy Practice  
295 for Educational Use. *Am J Pharm Educ* 2014;**78**(9):168.
- 296 7. Bsheti IA, Armour CL, Reddel HK, et al. Long-term maintenance of pharmacists' inhaler  
297 technique demonstration skills. *Am J Pharm Educ* 2009;**73**(2):32.
- 298 8. Westerlund T, Almarsdottir AB, Melander A. Factors influencing the detection rate of drug-  
299 related problems in community pharmacy. *Pharm World Sci* 1999;**21**(6):245-50.
- 300 9. Lamsam GD, Kropff MA. Community pharmacists' assessments and recommendations for  
301 treatment in four case scenarios. *Ann Pharmacother* 1998;**32**(4):409-16.
- 302 10. Zekan L, Mestrovic A, Seselja Perisin A, et al. Clinical knowledge of community pharmacists  
303 in Croatia for detecting drug-related problems. *Int J Clin Pharm* 2017;**39**(6):1171-74.
- 304 11. Mestrovic A, Stanicic Z, Hadziabdic MO, et al. Individualized education and competency  
305 development of Croatian community pharmacists using the general level framework. *Am*  
306 *J Pharm Educ* 2012;**76**(2):23.

- 1  
2  
3 307 12. Mestrovic A, Stanicic Z, Hadziabdic MO, et al. Evaluation of Croatian community  
4 308 pharmacists' patient care competencies using the general level framework. *Am J Pharm*  
5 309 *Educ* 2011;**75**(2):36.
- 6 310 13. Villeneuve J, Lamarre D, Lussier MT, et al. Physician-pharmacist collaborative care for  
7 311 dyslipidemia patients: knowledge and skills of community pharmacists. *J Contin Educ*  
8 312 *Health Prof* 2009;**29**(4):201-8.
- 9 313 14. Roque F, Herdeiro MT, Soares S, et al. Educational interventions to improve prescription  
10 314 and dispensing of antibiotics: a systematic review. *BMC Public Health* 2014;**14**:1276.
- 11 315 15. Pagotto C, Varallo F, Mastroianni P. Impact of educational interventions on adverse drug  
12 316 events reporting. *Int J Technol Assess Health Care* 2013;**29**(4):410-7.
- 13 317 16. Bellolio MF, Stead LG. Evidence-based emergency medicine/systematic review abstract.  
14 318 Continuing education meetings and workshops: effects on professional practice and  
15 319 health care outcomes. *Ann Emerg Med* 2009;**53**(5):685-7.
- 16 320 17. Davis D, O'Brien MA, Freemantle N, et al. Impact of formal continuing medical education: do  
17 321 conferences, workshops, rounds, and other traditional continuing education activities  
18 322 change physician behavior or health care outcomes? *JAMA* 1999;**282**(9):867-74.
- 19 323 18. Abdel Shaheed C, Maher CG, Mak W, et al. The effects of educational interventions on  
20 324 pharmacists' knowledge, attitudes and beliefs towards low back pain. *Int J Clin Pharm*  
21 325 2015;**37**(4):616-25.
- 22 326 19. Connolly M, Rutter V, Cardiff L. Evaluation of workshop-based peer review training to  
23 327 support pharmacist professional development. *Pharmacy Education* 2016;**16**(1):92 - 94.
- 24 328 20. Dhillon S, Raymond R. *Pharmacy case studies*. London: Pharmaceutical Press, 2009.
- 25 329 21. Dodds LJ. *Drugs in use : clinical case studies for pharmacists*. 4th ed. London ; Chicago:  
26 330 Pharmaceutical Press, 2010.
- 27 331 22. Williams M, Peterson GM, Tenni PC, et al. A clinical knowledge measurement tool to assess  
28 332 the ability of community pharmacists to detect drug-related problems. *Int J Pharm Pract*  
29 333 2012;**20**(4):238-48.
- 30 334 23. International Pharmaceutical Federation: Global Pharmacy Workforce and Migration Report,  
31 335 2006. [Available from:  
32 336 <http://fip.org/files/fip/publications/PharmacyWorkforceMigration.pdf>.
- 33 337 24. Currie JD, Chrischilles EA, Kuehl AK, et al. Effect of a training program on community  
34 338 pharmacists' detection of and intervention in drug-related problems. *J Am Pharm Assoc*  
35 339 (Wash) 1997;**NS37**(2):182-91.
- 36 340 25. Kimberlin CL, Berardo DH, Pendergast JF, et al. Effects of an education program for  
37 341 community pharmacists on detecting drug-related problems in elderly patients. *Med*  
38 342 *Care* 1993;**31**(5):451-68.
- 39 343 26. Lalonde L, Quintana-Barcena P, Lord A, et al. Community Pharmacist Training-and-  
40 344 Communication Network and Drug-Related Problems in Patients With CKD: A  
41 345 Multicenter, Cluster-Randomized, Controlled Trial. *Am J Kidney Dis* 2017;**70**(3):386-96.
- 42 346 27. International Pharmaceutical Federation: Global Pharmacy Workforce Report, 2009.  
43 347 [Available from:  
44 348 [http://fip.org/files/fip/publications/2009\\_FIP\\_Global\\_Pharmacy\\_Workforce\\_Report.pdf](http://fip.org/files/fip/publications/2009_FIP_Global_Pharmacy_Workforce_Report.pdf).
- 45 349 28. Obreli-Neto PR, Marques Dos Reis T, Guidoni CM, et al. A Systematic Review of the Effects  
46 350 of Continuing Education Programs on Providing Clinical Community Pharmacy Services.  
47 351 *Am J Pharm Educ* 2016;**80**(5):88.
- 48 352 29. Elkalmi RM, Hassali MA, Ibrahim MIM. Impact of Educational Intervention for Improving  
49 353 Pharmacist Knowledge in Adverse Drug Reactions (ADR) Reporting: Experience from  
50 354 Malaysia. *Open Drug Saf J* 2011;**2**:47-53.
- 51 355 30. Austin Z, Marini A, MacLeod Glover N, et al. Peer-mentoring workshop for continuous  
52 356 professional development. *Am J Pharm Educ* 2006;**70**(5):117.
- 53 357

1  
2  
3  
4  
5  
6  
7  
8  
9  
10  
11  
12  
13  
14  
15  
16  
17  
18  
19  
20  
21  
22  
23  
24  
25  
26  
27  
28  
29  
30  
31  
32  
33  
34  
35  
36  
37  
38  
39  
40  
41  
42  
43  
44  
45  
46  
47  
48  
49  
50  
51  
52  
53  
54  
55  
56  
57  
58  
59  
60

358

For peer review only

1  
2  
3 359 (Figure 1 legend)  
4  
5  
6

7 360 All values are presented as mean  $\pm$  SD. Statistically significant differences between pre- and post-workshop scores  
8  
9 361 are marked with a \* symbol (paired samples t-test,  $P < 0.001$ ). Median age of the study participants is 36 years. The  
10  
11 362 number of participants in each subgroup is specified in parentheses ().  
12  
13

14 363  
15  
16  
17  
18  
19  
20  
21  
22  
23  
24  
25  
26  
27  
28  
29  
30  
31  
32  
33  
34  
35  
36  
37  
38  
39  
40  
41  
42  
43  
44  
45  
46  
47  
48  
49  
50  
51  
52  
53  
54  
55  
56  
57  
58  
59  
60

For peer review only

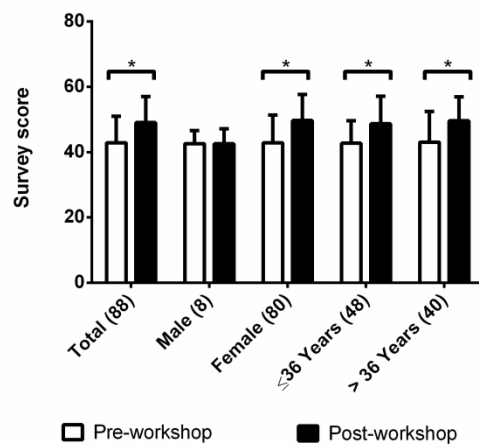

Fig 1. Pre- and post- workshop survey scores of participating community pharmacists by age and gender subgroups

All values are presented as mean  $\pm$  SD. Statistically significant differences between pre- and post-workshop scores are marked with a \* symbol (paired samples t-test,  $P < 0.001$ ). Median age of the study participants is 36 years. The number of participants in each subgroup is specified in parentheses ( ).

283x161mm (300 x 300 DPI)

# Clinical knowledge measurement tool about drug-related problems

Gender: (M) Male (F) Female Age (years): \_\_\_\_\_ Code: \_\_\_\_\_

**Instructions: Clinical cases 1 – 3.**  
 For each of the proposed statements, please indicate how relevant it is for each clinical case, by circling the appropriate number on 7-point scale (higher number indicates greater relevance).

**Clinical case 1**

A slightly overweight, 51-year-old female patient who regularly visits your pharmacy presents a prescription for perindopril 5 mg. The dispensing records indicate that the last antihypertensive agent prescribed for this patient was the perindopril/indapamide combination and it was last dispensed 3 months ago. Please indicate how relevant each piece of additional information would be in this case.

|                                                                                     | Totally irrelevant | Moderately irrelevant | Only slightly irrelevant | Neutral | Only slightly relevant | Moderately relevant | Very relevant |
|-------------------------------------------------------------------------------------|--------------------|-----------------------|--------------------------|---------|------------------------|---------------------|---------------|
| 1. Discuss with the patient whether the medication change was intentional.          | 1                  | 2                     | 3                        | 4       | 5                      | 6                   | 7             |
| 2. Discuss with the patient's doctor whether the medication change was intentional. | 1                  | 2                     | 3                        | 4       | 5                      | 6                   | 7             |
| 3. Discuss with the patient their compliance with the antihypertensive agent.       | 1                  | 2                     | 3                        | 4       | 5                      | 6                   | 7             |

**Clinical case 2**

A frail 80-year-old male patient presents to collect his last repeat from his glyceryl trinitrate (GTN) sublingual spray prescription. On dispensing, the pharmacist notices that this is the third time this medication has been dispensed in the last 2 weeks. Please indicate how relevant each piece of additional information would be in this case.

|                                                                                                   | Totally irrelevant | Moderately irrelevant | Only slightly irrelevant | Neutral | Only slightly relevant | Moderately relevant | Very relevant |
|---------------------------------------------------------------------------------------------------|--------------------|-----------------------|--------------------------|---------|------------------------|---------------------|---------------|
| 4. Determine if the pain the patient is feeling is actually due to angina.                        | 1                  | 2                     | 3                        | 4       | 5                      | 6                   | 7             |
| 5. Ask the patient to demonstrate his administration technique.                                   | 1                  | 2                     | 3                        | 4       | 5                      | 6                   | 7             |
| 6. Determine how long since the patient's general practitioner has reviewed his angina treatment. | 1                  | 2                     | 3                        | 4       | 5                      | 6                   | 7             |
| 7. Determine how efficacious the GTN spray is.                                                    | 1                  | 2                     | 3                        | 4       | 5                      | 6                   | 7             |

**Clinical case 3**

A 58 kg, 35-year-old woman presents to the pharmacy to collect a prescription for methotrexate 10 mg weekly from her rheumatologist, which is a new medication for her. Please indicate how relevant each piece of additional information would be in this case.

|                                                                                                                     | Totally irrelevant | Moderately irrelevant | Only slightly irrelevant | Neutral | Only slightly relevant | Moderately relevant | Very relevant |
|---------------------------------------------------------------------------------------------------------------------|--------------------|-----------------------|--------------------------|---------|------------------------|---------------------|---------------|
| 8. Determine if the patient has had baseline liver function tests.                                                  | 1                  | 2                     | 3                        | 4       | 5                      | 6                   | 7             |
| 9. Determine if the patient has had a negative pregnancy test and is currently taking/using adequate contraception. | 1                  | 2                     | 3                        | 4       | 5                      | 6                   | 7             |
| 10. Determine if the side effects of methotrexate have been explained to the patient.                               | 1                  | 2                     | 3                        | 4       | 5                      | 6                   | 7             |
| 11. Determine if the patient has been instructed to take folic acid.                                                | 1                  | 2                     | 3                        | 4       | 5                      | 6                   | 7             |
| 12. Determine how often the patient drinks alcohol.                                                                 | 1                  | 2                     | 3                        | 4       | 5                      | 6                   | 7             |

**Instructions: Clinical cases 4 – 6.**

For each of the proposed statements, please indicate how likely it is for each clinical case, by circling the appropriate number on 7-point scale (higher number indicates higher likelihood).

**Clinical case 4**

A 65 kg, 45-year-old female patient comes into the pharmacy to enquire about possible side effects. She was commenced on paroxetine 20 mg daily a few days ago and has been experiencing increasing anxiety (which is the reason the paroxetine was initially started), sweating and tachycardia. She has a medical history of atrial fibrillation and severe lower back pain, and is also taking digoxin, ramipril, tramadol and methadone. Please indicate how likely each drug-related problem would be in this case.

|                                                                                                                                            | Highly unlikely | Moderately unlikely | Only slightly unlikely | Neutral | Only slightly likely | Moderately likely | Highly likely |
|--------------------------------------------------------------------------------------------------------------------------------------------|-----------------|---------------------|------------------------|---------|----------------------|-------------------|---------------|
| 13. The commencement of the paroxetine may have resulted in an increase in anxiety for the patient.                                        | 1               | 2                   | 3                      | 4       | 5                    | 6                 | 7             |
| 14. This dose of paroxetine is unlikely to be controlling the patient's anxiety symptoms and an increase in her dose should be considered. | 1               | 2                   | 3                      | 4       | 5                    | 6                 | 7             |
| 15. The paroxetine may have interacted with the tramadol to cause the patient's symptoms.                                                  | 1               | 2                   | 3                      | 4       | 5                    | 6                 | 7             |
| 16. The paroxetine may have interacted with the digoxin to cause the patient's symptoms.                                                   | 1               | 2                   | 3                      | 4       | 5                    | 6                 | 7             |

**Clinical case 5**

A slightly overweight, 78 year-old female patient with a history of hypertension and mild heart failure presents with prescription for furosemide 20 mg daily to treat her swollen ankles. She is also currently taking lercanidipine 20 mg ramipril 2.5 mg daily, plus amitriptyline 10 mg nightly for sleep. Please indicate how likely each drug-related problem would be in this case.

|                                                                                                                    | Highly unlikely | Moderately unlikely | Only slightly unlikely | Neutral | Only slightly likely | Moderately likely | Highly likely |
|--------------------------------------------------------------------------------------------------------------------|-----------------|---------------------|------------------------|---------|----------------------|-------------------|---------------|
| 17. The patient's symptoms are likely to indicate a worsening of her heart failure.                                | 1               | 2                   | 3                      | 4       | 5                    | 6                 | 7             |
| 18. Lercanidipine could be causing peripheral edema.                                                               | 1               | 2                   | 3                      | 4       | 5                    | 6                 | 7             |
| 19. The swollen ankles may be due to an increased fluid intake resulting from hyperglycemia.                       | 1               | 2                   | 3                      | 4       | 5                    | 6                 | 7             |
| 20. The patient may have syndrome of inappropriate antidiuretic hormone secretion which has led to swollen ankles. | 1               | 2                   | 3                      | 4       | 5                    | 6                 | 7             |

**Clinical case 6**

A woman comes into the pharmacy to collect her elderly husband's prescriptions for him while he is recuperating at home. She states there is a new prescription for 'Imdur (isosorbide mononitrate) 60 mg in the morning' that was started in the hospital last week. The new medication doesn't seem to be working and her husband is still experiencing chest pain. The husband's history shows regular dispensing of pantoprazole 40 mg nightly, clopidogrel 75 mg in the morning, atorvastatin 20 mg nightly, Duride (isosorbide mononitrate) 60 mg nightly, perindopril 5 mg and tiotropium 18 µg in the morning and glyceril trinitrate spray p.r.n. Please indicate how likely each drug-related problem would be in this case.

|                                                                                                                                                                              | Highly unlikely | Moderately unlikely | Only slightly unlikely | Neutral | Only slightly likely | Moderately likely | Highly likely |
|------------------------------------------------------------------------------------------------------------------------------------------------------------------------------|-----------------|---------------------|------------------------|---------|----------------------|-------------------|---------------|
| 21. Her husband may be experiencing a decrease in symptom control for his chronic obstructive pulmonary disease and his shortness of breath is causing the chest pain.       | 1               | 2                   | 3                      | 4       | 5                    | 6                 | 7             |
| 22. Her husband may be experiencing nitrate tolerance if he has continued to take the Duride brand that he was initially prescribed, as well as the Imdur from the hospital. | 1               | 2                   | 3                      | 4       | 5                    | 6                 | 7             |
| 23. Her husband should have aspirin added to decrease his chest pain symptoms.                                                                                               | 1               | 2                   | 3                      | 4       | 5                    | 6                 | 7             |



**Instructions: Clinical cases 7 – 9.**

For each of the proposed statements, please indicate how appropriate it is for each clinical case, by circling the appropriate number on 7-point scale (higher number indicates higher appropriateness).

**Clinical case 7**

A slightly overweight, 70-year-old male patient is currently taking warfarin (dose is 5 mg/4 mg on alternate days). He has a dental prescription for an abscess for amoxicillin 500 mg three times a day and metronidazole 400 mg three times a day. Please indicate how appropriate each recommendation would be in this case.

|                                                                                                                                                         | Totally inappropriate | Moderately inappropriate | Only slightly inappropriate | Neutral | Only slightly appropriate | Moderately appropriate | Very appropriate |
|---------------------------------------------------------------------------------------------------------------------------------------------------------|-----------------------|--------------------------|-----------------------------|---------|---------------------------|------------------------|------------------|
| 24. Cease the warfarin while taking the antibiotics.                                                                                                    | 1                     | 2                        | 3                           | 4       | 5                         | 6                      | 7                |
| 25. Discuss the interaction with the patient and recommend an increase in international normalised ratio (INR) monitoring while taking the antibiotics. | 1                     | 2                        | 3                           | 4       | 5                         | 6                      | 7                |
| 26. Discuss the signs and symptoms of an increased INR with the patient.                                                                                | 1                     | 2                        | 3                           | 4       | 5                         | 6                      | 7                |
| 27. Recommend ibuprofen for pain relief for the dental abscess.                                                                                         | 1                     | 2                        | 3                           | 4       | 5                         | 6                      | 7                |
| 28. Halve the warfarin dose while taking the antibiotics.                                                                                               | 1                     | 2                        | 3                           | 4       | 5                         | 6                      | 7                |
| 29. Change the warfarin to aspirin while using the antibiotics.                                                                                         | 1                     | 2                        | 3                           | 4       | 5                         | 6                      | 7                |

**Clinical case 8**

A 65 year-old female with airways disease has a recent dispensing history containing Seretide 250/25 (two puffs twice a day and Ventolin inhaler (1–2 p.r.n.). She presents a 3-monthhold prescription to the pharmacist for prednisolone 25 mg, which reads '25 mg twice a day for three days, then 12.5 mg twice a day for three days'. On further discussion, the pharmacist determines that the patient is currently experiencing a worsening of the respiratory symptoms and is unsure what dose of prednisolone she should be taking. Please indicate how appropriate each recommendation would be in this case.

|                                                                                                                                       | Totally inappropriate | Moderately inappropriate | Only slightly inappropriate | Neutral | Only slightly appropriate | Moderately appropriate | Very appropriate |
|---------------------------------------------------------------------------------------------------------------------------------------|-----------------------|--------------------------|-----------------------------|---------|---------------------------|------------------------|------------------|
| 30. Advise the patient not to take the prednisolone 25 mg at all.                                                                     | 1                     | 2                        | 3                           | 4       | 5                         | 6                      | 7                |
| 31. Commence over-the-counter pantoprazole 20 mg daily to decrease the risk of gastrointestinal bleeds while taking the prednisolone. | 1                     | 2                        | 3                           | 4       | 5                         | 6                      | 7                |
| 32. Contact the patient's general practitioner and determine what prednisolone dose she should currently be taking.                   | 1                     | 2                        | 3                           | 4       | 5                         | 6                      | 7                |
| 33. Advise the patient to cease the Seretide while she is taking the prednisolone tablets.                                            | 1                     | 2                        | 3                           | 4       | 5                         | 6                      | 7                |
| 34. Advise the patient to increase the use of her Ventolin inhaler in preference to using the prednisolone.                           | 1                     | 2                        | 3                           | 4       | 5                         | 6                      | 7                |

1  
2  
3  
4  
5  
6  
7  
8  
9  
10  
11  
12  
13  
14  
15  
16  
17  
18  
19  
20  
21  
22  
23  
24  
25  
26  
27  
28  
29  
30  
31  
32  
33  
34  
35  
36  
37  
38  
39  
40  
41  
42  
43  
44  
45  
46  
47  
48  
49  
50  
51  
52  
53  
54  
55  
56  
57  
58  
59  
60**Clinical case 9**

120 kg, 40-year-old male smoker with osteoarthritis is taking esomeprazole 40 mg daily, but currently has no gastrointestinal symptoms. The only other medication he is currently taking is regular paracetamol for his osteoarthritis pain that he buys over the counter, and his dispensing history shows ketoprofen and cephalexin dispensed several months ago. Please indicate how appropriate each recommendation would be in this case.

|                                                                                                                          | Totally inappropriate | Moderately inappropriate | Only slightly inappropriate | Neutral | Only slightly appropriate | Moderately appropriate | Very appropriate |
|--------------------------------------------------------------------------------------------------------------------------|-----------------------|--------------------------|-----------------------------|---------|---------------------------|------------------------|------------------|
| 35. Recommend the patient return to the general practitioner to reduce his dose to 20 mg daily.                          | 1                     | 2                        | 3                           | 4       | 5                         | 6                      | 7                |
| 36. Recommend the patient return to the general practitioner to trial using esomeprazole on a p.r.n. basis.              | 1                     | 2                        | 3                           | 4       | 5                         | 6                      | 7                |
| 37. Discuss a weight management programme with the patient.                                                              | 1                     | 2                        | 3                           | 4       | 5                         | 6                      | 7                |
| 38. Discuss smoking cessation with the patient.                                                                          | 1                     | 2                        | 3                           | 4       | 5                         | 6                      | 7                |
| 39. Recommend the patient have his vitamin B12 levels checked.                                                           | 1                     | 2                        | 3                           | 4       | 5                         | 6                      | 7                |
| 40. Recommend the patient stop the regular paracetamol and change back to ketoprofen to control his osteoarthritis pain. | 1                     | 2                        | 3                           | 4       | 5                         | 6                      | 7                |

1-male  
2-female

**CORRE**  
7

**CLINIC**

| N  | PAIRING CODE | GENDER | AGE (years) |  | 1 |
|----|--------------|--------|-------------|--|---|
| 1  | IOB          | 2      | 33          |  | 6 |
| 2  | GMB          | 2      | 33          |  | 6 |
| 3  | ŽJD          | 2      | 37          |  | 7 |
| 4  | MPS          | 2      | 29          |  | 7 |
| 5  | DOŠ          | 2      | 29          |  | 7 |
| 6  | MPM          | 2      | 29          |  | 7 |
| 7  | DPA          | 2      | 38          |  | 7 |
| 8  | BLM          | 2      | 27          |  | 3 |
| 9  | MDI          | 2      | 35          |  | 2 |
| 10 | SBB          | 2      | 34          |  | 2 |
| 11 | JPB          | 2      | 38          |  | 7 |
| 12 | IJB          | 2      | 38          |  | 6 |
| 13 | ALJV         | 2      | 29          |  | 5 |
| 14 | BGV          | 2      | 39          |  | 7 |
| 15 | VJM          | 2      | 35          |  | 7 |
| 16 | JMB          | 2      | 34          |  | 7 |
| 17 | ŽGZ          | 1      | 28          |  | 6 |
| 18 | RBA          | 2      | 39          |  | 6 |
| 19 | KMP          | 2      | 35          |  | 2 |
| 20 | SJJ          | 2      | 54          |  | 6 |
| 21 | LJKB         | 2      | 52          |  | 6 |
| 22 | DRM          | 2      | 37          |  | 6 |
| 23 | ADA          | 2      | 25          |  | 5 |
| 24 | VMZ          | 1      | 36          |  | 6 |
| 25 | ŽPS          | 1      | 33          |  | 7 |
| 26 | KGI          | 2      | 28          |  | 7 |
| 27 | DLR          | 2      | 52          |  | 7 |
| 28 | DMM          | 2      | 53          |  | 7 |
| 29 | ZPT          | 2      | 45          |  | 7 |
| 30 | AGB          | 2      | 37          |  | 7 |
| 31 | MKJ          | 2      | 58          |  | 7 |
| 32 | CBB          | 2      | 26          |  | 6 |
| 33 | LET          | 2      | 30          |  | 6 |
| 34 | ASZ          | 2      | 32          |  | 6 |
| 35 | MMN          | 2      | 29          |  | 7 |
| 36 | SMA          | 2      | 52          |  | 5 |
| 37 | IRĐ          | 2      | 53          |  | 7 |
| 38 | IAI          | 2      | 41          |  | 7 |
| 39 | NMN          | 2      | 28          |  | 7 |
| 40 | ADL          | 2      | 46          |  | 7 |
| 41 | TTL          | 2      | 36          |  | 3 |

|    |    |      |   |    |   |
|----|----|------|---|----|---|
| 1  |    |      |   |    |   |
| 2  | 42 | RPB  | 2 | 42 | 1 |
| 3  | 43 | APV  | 2 | 41 | 7 |
| 4  | 44 | BMN  | 2 | 31 | 6 |
| 5  | 45 | DEM  | 2 | 27 | 7 |
| 6  | 46 | VMI  | 2 | 44 | 4 |
| 7  | 47 | PDZ  | 1 | 29 | 7 |
| 8  | 48 | TŠI  | 1 | 30 | 6 |
| 9  | 49 | GPJ  | 1 | 32 | 6 |
| 10 | 50 | JJV  | 2 | 53 | 6 |
| 11 | 51 | VBŽ  | 1 | 30 | 6 |
| 12 | 52 | NKN  | 2 | 53 | 6 |
| 13 | 53 | NBB  | 2 | 58 | 5 |
| 14 | 54 | MČM  | 2 | 30 | 5 |
| 15 | 55 | VSJ  | 2 | 53 | 7 |
| 16 | 56 | KAM  | 2 | 39 | 5 |
| 17 | 57 | JMA  | 2 | 45 | 7 |
| 18 | 58 | BVZ  | 2 | 50 | 7 |
| 19 | 59 | DKZ  | 2 | 27 | 7 |
| 20 | 60 | MTM  | 2 | 27 | 7 |
| 21 | 61 | ABK  | 2 | 32 | 5 |
| 22 | 62 | AJJ  | 2 | 46 | 7 |
| 23 | 63 | MMI  | 2 | 27 | 6 |
| 24 | 64 | NRI  | 2 | 47 | 6 |
| 25 | 65 | MŽS  | 2 | 47 | 4 |
| 26 | 66 | FPD  | 2 | 30 | 7 |
| 27 | 67 | MMI  | 2 | 26 | 7 |
| 28 | 68 | IVB  | 2 | 27 | 7 |
| 29 | 69 | IRS  | 2 | 45 | 7 |
| 30 | 70 | MCN  | 2 | 45 | 7 |
| 31 | 71 | ASA  | 2 | 43 | 7 |
| 32 | 72 | IMM  | 2 | 41 | 3 |
| 33 | 73 | RTM  | 2 | 41 | 7 |
| 34 | 74 | ZŠD  | 1 | 28 | 6 |
| 35 | 75 | IRJ  | 2 | 32 | 7 |
| 36 | 76 | SVR  | 2 | 26 | 7 |
| 37 | 77 | ALJA | 2 | 32 | 5 |
| 38 | 78 | KNS  | 2 | 24 | 7 |
| 39 | 79 | ISM  | 2 | 24 | 6 |
| 40 | 80 | MRM  | 2 | 25 | 7 |
| 41 | 81 | SPD  | 2 | 39 | 6 |
| 42 | 82 | MBS  | 2 | 32 | 7 |
| 43 | 83 | IVD  | 2 | 25 | 7 |
| 44 | 84 | JKB  | 2 | 27 | 6 |
| 45 | 85 | MSR  | 2 | 37 | 5 |
| 46 | 86 | PMV  | 2 | 44 | 5 |
| 47 | 87 | NCV  | 2 | 38 | 6 |
| 48 | 88 | IDZ  | 2 | 24 | 6 |
| 49 |    |      |   |    |   |
| 50 |    |      |   |    |   |
| 51 |    |      |   |    |   |
| 52 |    |      |   |    |   |
| 53 |    |      |   |    |   |
| 54 |    |      |   |    |   |
| 55 |    |      |   |    |   |
| 56 |    |      |   |    |   |
| 57 |    |      |   |    |   |
| 58 |    |      |   |    |   |
| 59 |    |      |   |    |   |
| 60 |    |      |   |    |   |

**ACT ANSWERS:**

|   |   |   |   |   |   |   |   |   |   |
|---|---|---|---|---|---|---|---|---|---|
| 7 | 7 | 7 | 7 | 7 | 7 | 7 | 7 | 7 | 7 |
|---|---|---|---|---|---|---|---|---|---|

**ALL CASES - PARTICIPANTS' ANSWERS (PRE-WORKSHOP)**

|    | 2 | 3 | 4 | 5 | 6 | 7 | 8 | 9 | 10 |
|----|---|---|---|---|---|---|---|---|----|
| 13 | 4 | 7 | 3 | 7 | 6 | 4 | 7 | 7 | 7  |
| 14 | 6 | 7 | 7 | 7 | 7 | 5 | 7 | 6 | 7  |
| 15 | 5 | 7 | 7 | 7 | 7 | 7 | 7 | 7 | 7  |
| 16 | 5 | 7 | 7 | 7 | 7 | 7 | 7 | 7 | 7  |
| 17 | 6 | 2 | 6 | 7 | 6 | 4 | 5 | 7 | 2  |
| 18 | 4 | 7 | 7 | 7 | 7 | 7 | 7 | 7 | 7  |
| 19 | 5 | 5 | 7 | 7 | 7 | 7 | 7 | 7 | 7  |
| 20 | 7 | 7 | 7 | 7 | 7 | 6 | 7 | 7 | 7  |
| 21 | 7 | 7 | 7 | 7 | 7 | 1 | 7 | 7 | 7  |
| 22 | 7 | 7 | 7 | 7 | 7 | 1 | 7 | 7 | 7  |
| 23 | 7 | 7 | 7 | 7 | 6 | 4 | 7 | 7 | 6  |
| 24 | 7 | 7 | 7 | 7 | 5 | 2 | 7 | 5 | 3  |
| 25 | 7 | 6 | 7 | 7 | 7 | 4 | 5 | 7 | 6  |
| 26 | 6 | 5 | 7 | 7 | 7 | 4 | 5 | 7 | 7  |
| 27 | 7 | 7 | 6 | 7 | 7 | 4 | 6 | 7 | 7  |
| 28 | 7 | 7 | 6 | 7 | 7 | 4 | 6 | 7 | 7  |
| 29 | 7 | 7 | 7 | 7 | 7 | 7 | 7 | 7 | 7  |
| 30 | 5 | 6 | 7 | 7 | 6 | 4 | 5 | 7 | 7  |
| 31 | 7 | 7 | 7 | 7 | 7 | 7 | 7 | 7 | 7  |
| 32 | 7 | 7 | 7 | 7 | 7 | 7 | 7 | 7 | 7  |
| 33 | 5 | 7 | 7 | 7 | 7 | 7 | 5 | 7 | 7  |
| 34 | 6 | 6 | 6 | 7 | 7 | 6 | 7 | 7 | 7  |
| 35 | 6 | 6 | 6 | 7 | 6 | 2 | 7 | 7 | 6  |
| 36 | 5 | 6 | 7 | 6 | 4 | 4 | 5 | 4 | 5  |
| 37 | 4 | 7 | 6 | 7 | 7 | 7 | 5 | 7 | 7  |
| 38 | 5 | 4 | 6 | 6 | 6 | 6 | 6 | 5 | 5  |
| 39 | 6 | 7 | 7 | 7 | 7 | 7 | 7 | 7 | 7  |
| 40 | 6 | 7 | 7 | 7 | 7 | 7 | 7 | 7 | 7  |
| 41 | 4 | 7 | 3 | 7 | 5 | 4 | 6 | 7 | 7  |
| 42 | 6 | 6 | 6 | 6 | 7 | 6 | 6 | 7 | 4  |
| 43 | 6 | 7 | 7 | 6 | 7 | 6 | 6 | 7 | 6  |
| 44 | 6 | 7 | 7 | 6 | 7 | 6 | 6 | 7 | 6  |
| 45 | 7 | 5 | 7 | 7 | 7 | 1 | 4 | 7 | 7  |
| 46 | 7 | 7 | 7 | 6 | 7 | 7 | 6 | 6 | 6  |
| 47 | 7 | 7 | 7 | 7 | 7 | 7 | 7 | 7 | 7  |
| 48 | 4 | 7 | 6 | 7 | 7 | 1 | 6 | 7 | 5  |
| 49 | 3 | 6 | 7 | 7 | 7 | 1 | 5 | 7 | 6  |
| 50 | 6 | 7 | 7 | 7 | 4 | 4 | 4 | 4 | 5  |
| 51 | 6 | 7 | 7 | 7 | 4 | 4 | 4 | 4 | 5  |
| 52 | 6 | 6 | 7 | 7 | 7 | 5 | 6 | 7 | 5  |
| 53 | 7 | 7 | 7 | 7 | 7 | 7 | 7 | 7 | 7  |
| 54 | 5 | 4 | 7 | 7 | 4 | 3 | 3 | 4 | 6  |
| 55 | 5 | 5 | 7 | 7 | 6 | 6 | 7 | 7 | 6  |
| 56 | 6 | 6 | 7 | 7 | 6 | 2 | 7 | 4 | 5  |
| 57 | 6 | 6 | 7 | 7 | 6 | 2 | 7 | 4 | 5  |
| 58 | 6 | 6 | 7 | 7 | 7 | 7 | 7 | 7 | 7  |
| 59 | 6 | 7 | 7 | 7 | 7 | 7 | 7 | 7 | 7  |
| 60 | 4 | 7 | 7 | 7 | 7 | 4 | 7 | 7 | 7  |
|    | 4 | 3 | 4 | 4 | 3 | 3 | 5 | 7 | 7  |

|    |   |   |   |   |   |   |   |   |   |
|----|---|---|---|---|---|---|---|---|---|
| 1  |   |   |   |   |   |   |   |   |   |
| 2  | 7 | 5 | 4 | 7 | 5 | 7 | 6 | 5 | 7 |
| 3  | 7 | 5 | 4 | 7 | 6 | 4 | 5 | 6 | 6 |
| 4  | 6 | 7 | 7 | 7 | 7 | 6 | 6 | 7 | 7 |
| 5  | 6 | 7 | 7 | 7 | 7 | 7 | 5 | 7 | 7 |
| 6  | 7 | 7 | 6 | 5 | 6 | 6 | 6 | 7 | 7 |
| 7  |   |   |   |   |   |   |   |   |   |
| 8  | 3 | 7 | 5 | 7 | 5 | 6 | 4 | 7 | 6 |
| 9  | 5 | 5 | 7 | 7 | 7 | 6 | 5 | 6 | 6 |
| 10 | 5 | 7 | 5 | 7 | 7 | 6 | 7 | 7 | 7 |
| 11 | 7 | 7 | 7 | 7 | 7 | 5 | 2 | 7 | 6 |
| 12 |   |   |   |   |   |   |   |   |   |
| 13 | 4 | 7 | 7 | 7 | 6 | 6 | 7 | 6 | 7 |
| 14 | 7 | 7 | 7 | 7 | 7 | 5 | 2 | 7 | 6 |
| 15 | 6 | 6 | 7 | 7 | 7 | 7 | 5 | 6 | 7 |
| 16 | 4 | 7 | 7 | 7 | 7 | 7 | 5 | 6 | 7 |
| 17 | 7 | 7 | 7 | 7 | 7 | 1 | 7 | 7 | 7 |
| 18 |   |   |   |   |   |   |   |   |   |
| 19 | 2 | 6 | 6 | 6 | 3 | 3 | 7 | 6 | 7 |
| 20 | 7 | 6 | 7 | 7 | 7 | 4 | 7 | 7 | 7 |
| 21 | 7 | 7 | 7 | 7 | 7 | 7 | 7 | 7 | 7 |
| 22 | 4 | 7 | 7 | 7 | 7 | 4 | 7 | 6 | 7 |
| 23 |   |   |   |   |   |   |   |   |   |
| 24 | 6 | 7 | 6 | 6 | 7 | 6 | 5 | 7 | 7 |
| 25 | 7 | 7 | 7 | 5 | 7 | 4 | 4 | 6 | 7 |
| 26 | 5 | 7 | 7 | 7 | 7 | 6 | 7 | 7 | 7 |
| 27 | 6 | 6 | 7 | 7 | 7 | 7 | 7 | 7 | 7 |
| 28 | 6 | 7 | 7 | 7 | 7 | 4 | 4 | 7 | 6 |
| 29 | 7 | 6 | 6 | 7 | 7 | 5 | 6 | 7 | 6 |
| 30 |   |   |   |   |   |   |   |   |   |
| 31 | 3 | 7 | 6 | 2 | 7 | 2 | 2 | 2 | 6 |
| 32 | 4 | 6 | 5 | 7 | 6 | 3 | 4 | 7 | 7 |
| 33 | 7 | 7 | 6 | 7 | 7 | 6 | 4 | 7 | 7 |
| 34 | 4 | 7 | 7 | 7 | 7 | 7 | 6 | 7 | 7 |
| 35 | 5 | 4 | 7 | 7 | 7 | 7 | 7 | 7 | 7 |
| 36 |   |   |   |   |   |   |   |   |   |
| 37 | 7 | 7 | 7 | 7 | 7 | 7 | 7 | 7 | 7 |
| 38 | 6 | 5 | 6 | 7 | 4 | 1 | 5 | 7 | 3 |
| 39 | 5 | 4 | 7 | 7 | 7 | 7 | 7 | 7 | 6 |
| 40 | 6 | 6 | 7 | 6 | 5 | 6 | 5 | 7 | 6 |
| 41 | 7 | 7 | 7 | 7 | 6 | 6 | 6 | 7 | 7 |
| 42 |   |   |   |   |   |   |   |   |   |
| 43 | 7 | 7 | 7 | 7 | 6 | 6 | 6 | 6 | 6 |
| 44 | 7 | 6 | 7 | 7 | 7 | 7 | 6 | 7 | 7 |
| 45 | 5 | 7 | 7 | 7 | 7 | 7 | 3 | 7 | 7 |
| 46 | 6 | 7 | 7 | 7 | 7 | 7 | 5 | 7 | 7 |
| 47 |   |   |   |   |   |   |   |   |   |
| 48 | 7 | 7 | 7 | 7 | 6 | 6 | 7 | 7 | 6 |
| 49 | 4 | 6 | 7 | 7 | 6 | 6 | 6 | 7 | 7 |
| 50 | 5 | 6 | 6 | 5 | 7 | 4 | 2 | 6 | 4 |
| 51 | 4 | 7 | 7 | 7 | 7 | 5 | 5 | 7 | 5 |
| 52 | 5 | 7 | 7 | 7 | 6 | 6 | 6 | 7 | 7 |
| 53 |   |   |   |   |   |   |   |   |   |
| 54 | 5 | 5 | 6 | 7 | 7 | 6 | 6 | 7 | 6 |
| 55 | 6 | 7 | 6 | 7 | 6 | 5 | 4 | 6 | 5 |
| 56 | 5 | 7 | 7 | 7 | 7 | 4 | 7 | 7 | 5 |
| 57 | 7 | 7 | 7 | 7 | 7 | 5 | 2 | 7 | 6 |
| 58 |   |   |   |   |   |   |   |   |   |
| 59 |   |   |   |   |   |   |   |   |   |
| 60 |   |   |   |   |   |   |   |   |   |

---

|   |   |   |   |   |   |   |   |   |
|---|---|---|---|---|---|---|---|---|
| 7 | 6 | 6 | 1 | 7 | 1 | 6 | 7 | 2 |
|---|---|---|---|---|---|---|---|---|

---

| 11 | 12 | 13 | 14 | 15 | 16 | 17 | 18 | 19 |
|----|----|----|----|----|----|----|----|----|
| 7  | 7  | 5  | 1  | 3  | 6  | 6  | 7  | 5  |
| 6  | 6  | 4  | 5  | 5  | 5  | 5  | 6  | 5  |
| 7  | 7  | 7  | 1  | 7  | 4  | 6  | 6  | 1  |
| 4  | 1  | 5  | 5  | 3  | 3  | 5  | 5  | 3  |
| 7  | 7  | 5  | 7  | 4  | 6  | 6  | 7  | 7  |
| 7  | 7  | 6  | 6  | 5  | 4  | 6  | 6  | 6  |
| 7  | 7  | 7  | 6  | 6  | 7  | 6  | 6  | 5  |
| 7  | 7  | 7  | 3  | 2  | 2  | 6  | 4  | 1  |
| 5  | 4  | 7  | 5  | 6  | 7  | 6  | 5  | 2  |
| 3  | 6  | 5  | 6  | 7  | 7  | 6  | 5  | 6  |
| 6  | 6  | 7  | 4  | 6  | 7  | 6  | 6  | 3  |
| 6  | 6  | 6  | 6  | 6  | 6  | 7  | 5  | 6  |
| 7  | 7  | 3  | 3  | 7  | 2  | 6  | 4  | 4  |
| 6  | 7  | 5  | 1  | 6  | 6  | 6  | 6  | 4  |
| 7  | 6  | 4  | 2  | 3  | 5  | 6  | 3  | 6  |
| 7  | 7  | 7  | 2  | 5  | 5  | 6  | 7  | 2  |
| 5  | 5  | 6  | 2  | 6  | 6  | 4  | 6  | 5  |
| 7  | 6  | 6  | 6  | 7  | 7  | 6  | 5  | 3  |
| 5  | 6  | 7  | 3  | 5  | 5  | 6  | 6  | 2  |
| 4  | 2  | 5  | 2  | 2  | 6  | 6  | 5  | 5  |
| 7  | 7  | 7  | 1  | 6  | 5  | 6  | 2  | 3  |
| 5  | 5  | 6  | 5  | 6  | 6  | 6  | 5  | 6  |
| 7  | 7  | 7  | 1  | 4  | 4  | 7  | 6  | 5  |
| 7  | 7  | 5  | 1  | 4  | 6  | 6  | 6  | 4  |
| 7  | 7  | 5  | 1  | 4  | 5  | 6  | 6  | 5  |
| 7  | 6  | 6  | 5  | 7  | 6  | 6  | 6  | 6  |
| 7  | 7  | 1  | 1  | 7  | 1  | 1  | 3  | 4  |
| 6  | 6  | 7  | 5  | 6  | 6  | 5  | 7  | 4  |
| 6  | 7  | 7  | 5  | 7  | 6  | 7  | 6  | 4  |
| 5  | 5  | 6  | 1  | 4  | 7  | 4  | 7  | 5  |
| 6  | 4  | 6  | 1  | 6  | 4  | 6  | 7  | 1  |
| 7  | 4  | 7  | 3  | 4  | 5  | 3  | 5  | 4  |
| 6  | 6  | 6  | 3  | 6  | 6  | 6  | 5  | 5  |
| 7  | 7  | 4  | 4  | 6  | 4  | 6  | 6  | 4  |
| 5  | 5  | 6  | 2  | 5  | 7  | 5  | 6  | 4  |
| 7  | 7  | 7  | 7  | 6  | 6  | 3  | 5  | 1  |
| 7  | 7  | 6  | 4  | 4  | 6  | 7  | 5  | 4  |
| 7  | 7  | 6  | 2  | 2  | 6  | 6  | 6  | 2  |
| 7  | 7  | 7  | 7  | 7  | 3  | 5  | 7  | 3  |
| 7  | 7  | 7  | 4  | 4  | 4  | 7  | 4  | 7  |
| 7  | 6  | 4  | 2  | 3  | 5  | 6  | 3  | 6  |



|    |   |   |   |   |   |   |   |   |   |
|----|---|---|---|---|---|---|---|---|---|
| 1  |   |   |   |   |   |   |   |   |   |
| 2  | 7 | 7 | 5 | 4 | 5 | 4 | 7 | 3 | 4 |
| 3  | 7 | 6 | 5 | 4 | 4 | 6 | 5 | 4 | 3 |
| 4  | 7 | 6 | 3 | 3 | 4 | 6 | 6 | 5 | 5 |
| 5  | 7 | 7 | 6 | 4 | 7 | 1 | 7 | 6 | 5 |
| 6  | 6 | 6 | 5 | 3 | 2 | 2 | 6 | 6 | 2 |
| 7  | 7 | 7 | 6 | 2 | 7 | 1 | 6 | 5 | 2 |
| 8  | 5 | 6 | 5 | 4 | 4 | 6 | 6 | 4 | 2 |
| 9  | 7 | 6 | 5 | 2 | 5 | 3 | 5 | 7 | 5 |
| 10 | 6 | 7 | 5 | 4 | 6 | 4 | 7 | 7 | 4 |
| 11 | 7 | 6 | 5 | 1 | 5 | 3 | 5 | 7 | 5 |
| 12 | 6 | 7 | 5 | 4 | 6 | 4 | 7 | 7 | 4 |
| 13 | 6 | 6 | 7 | 4 | 4 | 4 | 5 | 6 | 6 |
| 14 | 7 | 6 | 6 | 4 | 6 | 6 | 5 | 5 | 4 |
| 15 | 5 | 6 | 4 | 3 | 7 | 7 | 7 | 7 | 4 |
| 16 | 6 | 6 | 6 | 5 | 7 | 7 | 5 | 5 | 5 |
| 17 | 7 | 7 | 7 | 4 | 6 | 7 | 5 | 6 | 6 |
| 18 | 7 | 7 | 7 | 3 | 6 | 2 | 5 | 7 | 2 |
| 19 | 7 | 5 | 7 | 1 | 7 | 6 | 5 | 6 | 5 |
| 20 | 7 | 5 | 6 | 2 | 7 | 5 | 5 | 7 | 4 |
| 21 | 6 | 6 | 6 | 4 | 4 | 4 | 5 | 6 | 5 |
| 22 | 5 | 6 | 5 | 6 | 6 | 6 | 5 | 6 | 3 |
| 23 | 7 | 7 | 5 | 5 | 7 | 7 | 7 | 7 | 5 |
| 24 | 7 | 4 | 6 | 3 | 5 | 6 | 4 | 6 | 2 |
| 25 | 7 | 7 | 1 | 5 | 7 | 3 | 7 | 5 | 5 |
| 26 | 2 | 2 | 7 | 2 | 6 | 1 | 6 | 2 | 2 |
| 27 | 5 | 7 | 5 | 4 | 7 | 3 | 5 | 6 | 2 |
| 28 | 7 | 6 | 6 | 5 | 7 | 6 | 6 | 7 | 3 |
| 29 | 7 | 7 | 7 | 1 | 7 | 7 | 5 | 4 | 1 |
| 30 | 7 | 7 | 6 | 1 | 7 | 3 | 5 | 6 | 1 |
| 31 | 7 | 7 | 7 | 1 | 7 | 1 | 5 | 4 | 1 |
| 32 | 6 | 7 | 5 | 2 | 7 | 4 | 6 | 4 | 5 |
| 33 | 7 | 7 | 6 | 3 | 7 | 2 | 7 | 6 | 1 |
| 34 | 6 | 6 | 5 | 4 | 6 | 2 | 6 | 4 | 2 |
| 35 | 7 | 7 | 5 | 3 | 3 | 4 | 6 | 6 | 1 |
| 36 | 6 | 6 | 6 | 5 | 6 | 6 | 7 | 6 | 4 |
| 37 | 7 | 7 | 6 | 6 | 7 | 7 | 4 | 5 | 6 |
| 38 | 7 | 7 | 7 | 2 | 6 | 7 | 7 | 7 | 3 |
| 39 | 7 | 6 | 5 | 2 | 5 | 6 | 6 | 7 | 7 |
| 40 | 6 | 5 | 2 | 1 | 1 | 1 | 6 | 7 | 1 |
| 41 | 5 | 5 | 5 | 2 | 5 | 4 | 4 | 5 | 4 |
| 42 | 6 | 2 | 3 | 3 | 5 | 5 | 6 | 6 | 4 |
| 43 | 7 | 4 | 4 | 1 | 5 | 7 | 7 | 7 | 3 |
| 44 | 7 | 7 | 5 | 4 | 7 | 5 | 3 | 7 | 2 |
| 45 | 7 | 6 | 6 | 5 | 4 | 4 | 5 | 7 | 3 |
| 46 | 7 | 6 | 6 | 5 | 7 | 7 | 5 | 6 | 7 |
| 47 | 7 | 6 | 7 | 5 | 7 | 4 | 6 | 5 | 4 |
| 48 | 6 | 7 | 5 | 4 | 6 | 4 | 7 | 7 | 4 |
| 49 | 5 | 5 | 5 | 2 | 5 | 4 | 4 | 5 | 4 |
| 50 | 6 | 2 | 3 | 3 | 5 | 5 | 6 | 6 | 4 |
| 51 | 7 | 4 | 4 | 1 | 5 | 7 | 7 | 7 | 3 |
| 52 | 7 | 7 | 5 | 4 | 7 | 5 | 3 | 7 | 2 |
| 53 | 7 | 6 | 6 | 5 | 4 | 4 | 5 | 7 | 3 |
| 54 | 7 | 6 | 6 | 5 | 7 | 7 | 5 | 6 | 7 |
| 55 | 7 | 6 | 7 | 5 | 7 | 4 | 6 | 5 | 4 |
| 56 | 6 | 7 | 5 | 4 | 6 | 4 | 7 | 7 | 4 |
| 57 |   |   |   |   |   |   |   |   |   |
| 58 |   |   |   |   |   |   |   |   |   |
| 59 |   |   |   |   |   |   |   |   |   |
| 60 |   |   |   |   |   |   |   |   |   |

---

|   |   |   |   |   |   |   |   |   |
|---|---|---|---|---|---|---|---|---|
| 3 | 5 | 7 | 1 | 1 | 7 | 7 | 1 | 1 |
|---|---|---|---|---|---|---|---|---|

---

|    | 20 | 21 | 22 | 23 | 24 | 25 | 26 | 27 | 28 |
|----|----|----|----|----|----|----|----|----|----|
| 13 | 2  | 7  | 7  | 1  | 5  | 7  | 7  | 1  | 6  |
| 14 | 5  | 5  | 6  | 4  | 4  | 7  | 7  | 2  | 2  |
| 15 | 4  | 6  | 6  | 4  | 1  | 7  | 7  | 1  | 1  |
| 16 | 4  | 5  | 6  | 4  | 5  | 7  | 7  | 7  | 6  |
| 17 | 7  | 5  | 6  | 4  | 1  | 7  | 7  | 1  | 7  |
| 18 | 6  | 6  | 6  | 6  | 4  | 7  | 7  | 1  | 5  |
| 19 | 5  | 5  | 6  | 4  | 1  | 6  | 6  | 2  | 5  |
| 20 | 1  | 4  | 7  | 1  | 1  | 6  | 7  | 1  | 1  |
| 21 | 4  | 4  | 7  | 2  | 2  | 6  | 7  | 1  | 1  |
| 22 | 6  | 5  | 6  | 4  | 3  | 5  | 3  | 2  | 2  |
| 23 | 5  | 5  | 5  | 1  | 2  | 6  | 6  | 1  | 1  |
| 24 | 6  | 6  | 6  | 7  | 5  | 7  | 7  | 7  | 6  |
| 25 | 5  | 5  | 7  | 2  | 1  | 7  | 7  | 2  | 1  |
| 26 | 4  | 1  | 7  | 4  | 5  | 7  | 7  | 1  | 5  |
| 27 | 4  | 7  | 4  | 1  | 1  | 1  | 7  | 1  | 2  |
| 28 | 2  | 6  | 6  | 1  | 1  | 7  | 7  | 2  | 5  |
| 29 | 3  | 6  | 6  | 2  | 2  | 7  | 7  | 1  | 6  |
| 30 | 4  | 4  | 7  | 1  | 3  | 7  | 7  | 1  | 5  |
| 31 | 2  | 5  | 4  | 3  | 6  | 7  | 7  | 3  | 4  |
| 32 | 2  | 1  | 7  | 1  | 6  | 7  | 5  | 1  | 4  |
| 33 | 3  | 5  | 6  | 5  | 3  | 7  | 7  | 3  | 2  |
| 34 | 5  | 5  | 6  | 5  | 4  | 6  | 6  | 4  | 6  |
| 35 | 5  | 6  | 6  | 1  | 5  | 7  | 7  | 1  | 5  |
| 36 | 1  | 7  | 5  | 1  | 5  | 7  | 7  | 1  | 6  |
| 37 | 4  | 6  | 5  | 6  | 1  | 7  | 5  | 1  | 2  |
| 38 | 4  | 6  | 7  | 4  | 1  | 6  | 6  | 3  | 1  |
| 39 | 1  | 4  | 7  | 1  | 1  | 6  | 4  | 1  | 1  |
| 40 | 4  | 6  | 7  | 4  | 2  | 7  | 7  | 1  | 1  |
| 41 | 7  | 6  | 7  | 3  | 4  | 6  | 6  | 7  | 2  |
| 42 | 2  | 5  | 5  | 3  | 2  | 7  | 7  | 1  | 2  |
| 43 | 6  | 5  | 1  | 1  | 1  | 4  | 4  | 1  | 1  |
| 44 | 4  | 5  | 5  | 4  | 3  | 7  | 7  | 1  | 5  |
| 45 | 6  | 5  | 6  | 6  | 3  | 6  | 6  | 1  | 3  |
| 46 | 5  | 4  | 5  | 1  | 1  | 7  | 7  | 1  | 1  |
| 47 | 3  | 6  | 7  | 4  | 4  | 6  | 6  | 3  | 4  |
| 48 | 1  | 7  | 1  | 1  | 1  | 7  | 7  | 1  | 1  |
| 49 | 4  | 6  | 7  | 4  | 1  | 7  | 7  | 4  | 4  |
| 50 | 6  | 1  | 7  | 1  | 1  | 7  | 7  | 1  | 1  |
| 51 | 3  | 7  | 6  | 2  | 6  | 7  | 7  | 1  | 5  |
| 52 | 4  | 4  | 4  | 4  | 4  | 7  | 7  | 1  | 4  |
| 53 | 4  | 7  | 4  | 1  | 1  | 1  | 7  | 1  | 2  |

|    |   |   |   |   |   |   |   |   |   |
|----|---|---|---|---|---|---|---|---|---|
| 1  |   |   |   |   |   |   |   |   |   |
| 2  | 3 | 6 | 4 | 7 | 5 | 3 | 7 | 1 | 4 |
| 3  | 7 | 5 | 7 | 4 | 4 | 5 | 5 | 3 | 5 |
| 4  | 3 | 1 | 3 | 1 | 1 | 7 | 7 | 1 | 7 |
| 5  | 4 | 7 | 6 | 1 | 2 | 7 | 7 | 1 | 4 |
| 6  | 5 | 5 | 6 | 4 | 1 | 4 | 5 | 1 | 2 |
| 7  | 2 | 5 | 7 | 3 | 3 | 7 | 6 | 1 | 6 |
| 8  | 2 | 5 | 7 | 2 | 5 | 7 | 7 | 4 | 6 |
| 9  | 1 | 5 | 7 | 4 | 4 | 7 | 7 | 2 | 6 |
| 10 | 4 | 6 | 4 | 4 | 1 | 1 | 1 | 1 | 1 |
| 11 | 1 | 5 | 7 | 4 | 1 | 7 | 7 | 3 | 6 |
| 12 | 4 | 6 | 4 | 4 | 1 | 1 | 1 | 1 | 1 |
| 13 | 6 | 6 | 4 | 2 | 1 | 5 | 5 | 5 | 5 |
| 14 | 5 | 5 | 5 | 4 | 4 | 6 | 7 | 3 | 5 |
| 15 | 5 | 6 | 7 | 1 | 6 | 7 | 6 | 1 | 4 |
| 16 | 5 | 5 | 5 | 5 | 3 | 6 | 6 | 6 | 4 |
| 17 | 6 | 4 | 7 | 3 | 5 | 6 | 6 | 1 | 5 |
| 18 | 4 | 4 | 7 | 1 | 1 | 7 | 7 | 3 | 1 |
| 19 | 4 | 5 | 7 | 3 | 2 | 7 | 7 | 1 | 5 |
| 20 | 4 | 5 | 7 | 2 | 1 | 7 | 7 | 1 | 6 |
| 21 | 6 | 6 | 6 | 1 | 2 | 7 | 7 | 1 | 3 |
| 22 | 5 | 2 | 6 | 1 | 2 | 6 | 6 | 1 | 1 |
| 23 | 5 | 6 | 7 | 4 | 1 | 7 | 7 | 2 | 2 |
| 24 | 2 | 4 | 7 | 2 | 1 | 7 | 5 | 1 | 2 |
| 25 | 3 | 5 | 5 | 3 | 1 | 7 | 5 | 3 | 3 |
| 26 | 2 | 5 | 6 | 2 | 1 | 6 | 6 | 1 | 1 |
| 27 | 5 | 5 | 3 | 1 | 1 | 7 | 7 | 3 | 4 |
| 28 | 4 | 2 | 6 | 1 | 2 | 7 | 7 | 1 | 3 |
| 29 | 4 | 4 | 4 | 1 | 1 | 7 | 7 | 1 | 5 |
| 30 | 1 | 4 | 4 | 1 | 2 | 7 | 7 | 1 | 3 |
| 31 | 4 | 5 | 7 | 1 | 1 | 7 | 7 | 1 | 6 |
| 32 | 4 | 4 | 4 | 4 | 2 | 4 | 4 | 4 | 4 |
| 33 | 1 | 4 | 5 | 1 | 1 | 7 | 7 | 1 | 3 |
| 34 | 3 | 5 | 5 | 3 | 2 | 5 | 5 | 1 | 2 |
| 35 | 1 | 4 | 7 | 2 | 1 | 6 | 5 | 1 | 2 |
| 36 | 5 | 6 | 6 | 4 | 5 | 7 | 7 | 3 | 5 |
| 37 | 4 | 1 | 5 | 6 | 4 | 7 | 6 | 1 | 4 |
| 38 | 3 | 3 | 3 | 2 | 7 | 7 | 7 | 2 | 2 |
| 39 | 4 | 3 | 7 | 1 | 4 | 7 | 6 | 2 | 6 |
| 40 | 4 | 6 | 6 | 1 | 1 | 7 | 7 | 1 | 1 |
| 41 | 3 | 7 | 6 | 4 | 1 | 6 | 6 | 1 | 4 |
| 42 | 4 | 5 | 5 | 2 | 2 | 6 | 5 | 1 | 3 |
| 43 | 1 | 3 | 7 | 4 | 1 | 4 | 7 | 2 | 2 |
| 44 | 2 | 6 | 5 | 2 | 1 | 5 | 5 | 4 | 2 |
| 45 | 2 | 5 | 6 | 2 | 2 | 5 | 5 | 4 | 2 |
| 46 | 6 | 6 | 7 | 5 | 1 | 7 | 4 | 1 | 3 |
| 47 | 5 | 6 | 7 | 4 | 1 | 7 | 6 | 1 | 3 |
| 48 | 4 | 6 | 4 | 4 | 1 | 1 | 1 | 1 | 1 |
| 49 |   |   |   |   |   |   |   |   |   |
| 50 |   |   |   |   |   |   |   |   |   |
| 51 |   |   |   |   |   |   |   |   |   |
| 52 |   |   |   |   |   |   |   |   |   |
| 53 |   |   |   |   |   |   |   |   |   |
| 54 |   |   |   |   |   |   |   |   |   |
| 55 |   |   |   |   |   |   |   |   |   |
| 56 |   |   |   |   |   |   |   |   |   |
| 57 |   |   |   |   |   |   |   |   |   |
| 58 |   |   |   |   |   |   |   |   |   |
| 59 |   |   |   |   |   |   |   |   |   |
| 60 |   |   |   |   |   |   |   |   |   |

---

|   |   |   |   |   |   |   |   |   |   |
|---|---|---|---|---|---|---|---|---|---|
| 1 | 1 | 1 | 1 | 7 | 1 | 1 | 7 | 7 | 6 |
|---|---|---|---|---|---|---|---|---|---|

---

| 29 | 30 | 31 | 32 | 33 | 34 | 35 | 36 | 37 |
|----|----|----|----|----|----|----|----|----|
| 5  | 7  | 4  | 1  | 1  | 1  | 3  | 5  | 7  |
| 1  | 3  | 5  | 7  | 3  | 1  | 7  | 4  | 6  |
| 1  | 1  | 7  | 7  | 1  | 1  | 4  | 7  | 7  |
| 4  | 2  | 6  | 7  | 2  | 1  | 6  | 4  | 7  |
| 1  | 5  | 5  | 4  | 4  | 4  | 6  | 1  | 7  |
| 4  | 5  | 5  | 5  | 3  | 3  | 5  | 5  | 7  |
| 2  | 7  | 7  | 6  | 2  | 6  | 6  | 6  | 6  |
| 1  | 6  | 4  | 7  | 4  | 1  | 5  | 7  | 7  |
| 1  | 7  | 1  | 4  | 1  | 1  | 5  | 7  | 7  |
| 2  | 7  | 1  | 1  | 1  | 1  | 6  | 6  | 7  |
| 2  | 7  | 1  | 7  | 3  | 6  | 7  | 7  | 7  |
| 1  | 7  | 7  | 7  | 2  | 1  | 4  | 2  | 7  |
| 1  | 1  | 7  | 7  | 3  | 1  | 5  | 2  | 7  |
| 2  | 5  | 6  | 7  | 1  | 1  | 6  | 6  | 5  |
| 1  | 1  | 7  | 6  | 2  | 2  | 2  | 7  | 6  |
| 1  | 4  | 6  | 6  | 2  | 2  | 7  | 2  | 7  |
| 4  | 6  | 3  | 7  | 3  | 2  | 5  | 4  | 6  |
| 1  | 3  | 5  | 7  | 1  | 1  | 5  | 6  | 6  |
| 4  | 2  | 5  | 7  | 3  | 4  | 7  | 6  | 6  |
| 5  | 7  | 2  | 5  | 1  | 5  | 6  | 3  | 6  |
| 1  | 2  | 3  | 7  | 6  | 2  | 6  | 3  | 7  |
| 5  | 5  | 5  | 6  | 5  | 5  | 5  | 5  | 6  |
| 6  | 3  | 7  | 7  | 2  | 1  | 6  | 5  | 7  |
| 5  | 7  | 2  | 1  | 1  | 1  | 3  | 5  | 6  |
| 1  | 1  | 6  | 6  | 1  | 1  | 6  | 6  | 6  |
| 1  | 6  | 4  | 7  | 1  | 1  | 5  | 5  | 6  |
| 1  | 7  | 7  | 7  | 1  | 1  | 7  | 1  | 7  |
| 1  | 7  | 1  | 7  | 1  | 1  | 4  | 4  | 4  |
| 2  | 7  | 3  | 7  | 1  | 1  | 6  | 6  | 7  |
| 1  | 4  | 4  | 7  | 3  | 2  | 5  | 5  | 7  |
| 1  | 7  | 1  | 7  | 1  | 1  | 1  | 5  | 1  |
| 3  | 4  | 5  | 5  | 1  | 1  | 2  | 5  | 5  |
| 1  | 4  | 6  | 5  | 5  | 4  | 5  | 4  | 6  |
| 1  | 7  | 1  | 4  | 1  | 1  | 4  | 4  | 6  |
| 4  | 4  | 5  | 7  | 4  | 4  | 6  | 7  | 5  |
| 1  | 5  | 5  | 7  | 7  | 1  | 4  | 4  | 7  |
| 1  | 1  | 7  | 7  | 1  | 1  | 7  | 1  | 6  |
| 1  | 1  | 7  | 7  | 1  | 1  | 1  | 1  | 7  |
| 4  | 2  | 5  | 7  | 3  | 4  | 5  | 7  | 7  |
| 4  | 4  | 7  | 7  | 4  | 1  | 7  | 4  | 7  |
| 1  | 1  | 7  | 6  | 2  | 2  | 2  | 7  | 6  |

|    |   |   |   |   |   |   |   |   |   |
|----|---|---|---|---|---|---|---|---|---|
| 1  |   |   |   |   |   |   |   |   |   |
| 2  | 1 | 4 | 4 | 7 | 4 | 1 | 4 | 7 | 7 |
| 3  | 4 | 3 | 5 | 7 | 3 | 2 | 5 | 3 | 7 |
| 4  | 1 | 1 | 6 | 7 | 1 | 1 | 7 | 7 | 7 |
| 5  | 3 | 6 | 1 | 7 | 2 | 1 | 6 | 7 | 7 |
| 6  | 1 | 2 | 6 | 7 | 6 | 2 | 6 | 6 | 7 |
| 7  | 1 | 4 | 5 | 5 | 1 | 1 | 4 | 6 | 6 |
| 8  | 5 | 4 | 4 | 6 | 3 | 1 | 6 | 7 | 6 |
| 9  | 2 | 7 | 1 | 5 | 2 | 2 | 7 | 6 | 7 |
| 10 | 1 | 7 | 1 | 7 | 1 | 1 | 1 | 6 | 7 |
| 11 | 1 | 7 | 1 | 5 | 4 | 2 | 7 | 6 | 5 |
| 12 | 1 | 7 | 1 | 7 | 1 | 1 | 1 | 6 | 7 |
| 13 | 1 | 2 | 4 | 7 | 1 | 1 | 2 | 4 | 7 |
| 14 | 4 | 6 | 5 | 7 | 4 | 4 | 6 | 7 | 6 |
| 15 | 5 | 1 | 5 | 7 | 4 | 1 | 6 | 4 | 7 |
| 16 | 4 | 4 | 5 | 6 | 2 | 5 | 5 | 6 | 6 |
| 17 | 4 | 4 | 5 | 6 | 2 | 5 | 5 | 6 | 6 |
| 18 | 1 | 7 | 1 | 7 | 3 | 2 | 7 | 7 | 7 |
| 19 | 1 | 4 | 7 | 7 | 3 | 1 | 6 | 5 | 7 |
| 20 | 1 | 4 | 7 | 7 | 3 | 1 | 6 | 5 | 7 |
| 21 | 2 | 2 | 5 | 6 | 4 | 2 | 5 | 5 | 7 |
| 22 | 1 | 2 | 6 | 7 | 2 | 2 | 6 | 6 | 7 |
| 23 | 1 | 5 | 2 | 7 | 4 | 4 | 5 | 3 | 6 |
| 24 | 2 | 7 | 5 | 5 | 1 | 1 | 7 | 6 | 6 |
| 25 | 1 | 4 | 7 | 7 | 3 | 2 | 6 | 6 | 6 |
| 26 | 1 | 4 | 5 | 6 | 1 | 1 | 3 | 3 | 7 |
| 27 | 1 | 5 | 6 | 7 | 3 | 3 | 6 | 3 | 7 |
| 28 | 1 | 2 | 6 | 7 | 1 | 1 | 2 | 2 | 5 |
| 29 | 1 | 6 | 1 | 7 | 1 | 2 | 4 | 6 | 7 |
| 30 | 1 | 7 | 1 | 3 | 2 | 6 | 5 | 5 | 7 |
| 31 | 1 | 7 | 4 | 7 | 4 | 1 | 7 | 1 | 7 |
| 32 | 1 | 7 | 6 | 7 | 2 | 1 | 7 | 7 | 7 |
| 33 | 1 | 6 | 6 | 7 | 2 | 2 | 7 | 5 | 7 |
| 34 | 4 | 4 | 7 | 6 | 2 | 4 | 4 | 5 | 6 |
| 35 | 2 | 6 | 7 | 4 | 2 | 6 | 7 | 5 | 6 |
| 36 | 1 | 2 | 6 | 7 | 2 | 2 | 5 | 5 | 6 |
| 37 | 1 | 2 | 2 | 5 | 2 | 2 | 5 | 5 | 7 |
| 38 | 3 | 3 | 5 | 6 | 2 | 2 | 6 | 6 | 7 |
| 39 | 7 | 4 | 5 | 4 | 5 | 6 | 7 | 1 | 7 |
| 40 | 1 | 1 | 1 | 6 | 1 | 1 | 2 | 2 | 7 |
| 41 | 1 | 4 | 4 | 6 | 1 | 1 | 4 | 6 | 7 |
| 42 | 1 | 7 | 1 | 5 | 2 | 1 | 3 | 1 | 7 |
| 43 | 4 | 6 | 4 | 5 | 5 | 5 | 5 | 4 | 7 |
| 44 | 2 | 1 | 3 | 5 | 1 | 1 | 6 | 6 | 4 |
| 45 | 2 | 7 | 1 | 1 | 1 | 7 | 4 | 2 | 7 |
| 46 | 1 | 2 | 6 | 5 | 1 | 1 | 5 | 1 | 7 |
| 47 | 1 | 2 | 6 | 5 | 1 | 1 | 7 | 1 | 6 |
| 48 | 1 | 1 | 5 | 7 | 3 | 1 | 1 | 7 | 7 |
| 49 | 1 | 1 | 5 | 7 | 2 | 1 | 3 | 7 | 7 |
| 50 | 1 | 7 | 1 | 7 | 2 | 1 | 1 | 6 | 7 |
| 51 |   |   |   |   |   |   |   |   |   |
| 52 |   |   |   |   |   |   |   |   |   |
| 53 |   |   |   |   |   |   |   |   |   |
| 54 |   |   |   |   |   |   |   |   |   |
| 55 |   |   |   |   |   |   |   |   |   |
| 56 |   |   |   |   |   |   |   |   |   |
| 57 |   |   |   |   |   |   |   |   |   |
| 58 |   |   |   |   |   |   |   |   |   |
| 59 |   |   |   |   |   |   |   |   |   |
| 60 |   |   |   |   |   |   |   |   |   |

1  
2  
3  
4  
5  
6  
7  
8  
9  
10  
11  
12  
13  
14  
15  
16  
17  
18  
19  
20  
21  
22  
23  
24  
25  
26  
27  
28  
29  
30  
31  
32  
33  
34  
35  
36  
37  
38  
39  
40  
41  
42  
43  
44  
45  
46  
47  
48  
49  
50  
51  
52  
53  
54  
55  
56  
57  
58  
59  
60

|   |   |   |
|---|---|---|
|   |   |   |
| 6 | 4 | 1 |

|    |    |    |
|----|----|----|
|    |    |    |
| 38 | 39 | 40 |

|   |   |   |
|---|---|---|
| 7 | 6 | 7 |
| 6 | 4 | 1 |
| 7 | 5 | 4 |
| 7 | 4 | 5 |
| 7 | 1 | 7 |
| 7 | 4 | 5 |
| 6 | 2 | 6 |
| 7 | 4 | 1 |
| 7 | 2 | 6 |
| 7 | 4 | 6 |
| 7 | 6 | 4 |
| 7 | 7 | 1 |
| 7 | 2 | 7 |
| 5 | 5 | 1 |
| 6 | 4 | 3 |
| 7 | 1 | 2 |
| 6 | 4 | 6 |
| 6 | 4 | 3 |
| 6 | 4 | 3 |
| 6 | 1 | 3 |
| 7 | 7 | 2 |
| 6 | 5 | 4 |
| 7 | 6 | 1 |
| 7 | 7 | 6 |
| 6 | 5 | 6 |
| 6 | 4 | 3 |
| 7 | 5 | 6 |
| 5 | 4 | 5 |
| 7 | 4 | 2 |
| 7 | 5 | 2 |
| 4 | 4 | 1 |
| 5 | 5 | 1 |
| 6 | 6 | 4 |
| 6 | 4 | 1 |
| 6 | 5 | 5 |
| 7 | 4 | 7 |
| 7 | 4 | 2 |
| 7 | 4 | 1 |
| 7 | 4 | 2 |
| 7 | 4 | 4 |
| 6 | 4 | 3 |

**SCORING (2 - CORRECT ANSWER, 1 - AL**

| 1 | 2 | 3 | 4 | 5 |
|---|---|---|---|---|
| 1 | 0 | 2 | 0 | 2 |
| 1 | 1 | 2 | 2 | 2 |
| 2 | 0 | 2 | 2 | 2 |
| 2 | 1 | 0 | 1 | 2 |
| 2 | 0 | 2 | 2 | 2 |
| 2 | 0 | 0 | 2 | 2 |
| 2 | 2 | 2 | 2 | 2 |
| 0 | 2 | 2 | 2 | 2 |
| 0 | 2 | 2 | 2 | 2 |
| 0 | 2 | 2 | 2 | 2 |
| 2 | 2 | 1 | 2 | 2 |
| 1 | 1 | 0 | 2 | 2 |
| 0 | 2 | 2 | 2 | 2 |
| 2 | 0 | 1 | 2 | 2 |
| 2 | 2 | 2 | 2 | 2 |
| 1 | 0 | 2 | 2 | 2 |
| 1 | 1 | 1 | 1 | 2 |
| 0 | 1 | 1 | 1 | 2 |
| 1 | 0 | 1 | 2 | 1 |
| 1 | 0 | 2 | 1 | 2 |
| 1 | 0 | 0 | 1 | 1 |
| 0 | 1 | 2 | 2 | 2 |
| 1 | 0 | 2 | 0 | 2 |
| 2 | 1 | 1 | 1 | 1 |
| 2 | 1 | 2 | 2 | 1 |
| 2 | 2 | 0 | 2 | 2 |
| 2 | 2 | 2 | 2 | 1 |
| 2 | 2 | 2 | 2 | 2 |
| 2 | 0 | 2 | 1 | 2 |
| 2 | 0 | 1 | 2 | 2 |
| 1 | 1 | 2 | 2 | 2 |
| 1 | 1 | 1 | 2 | 2 |
| 1 | 2 | 2 | 2 | 2 |
| 2 | 0 | 0 | 2 | 2 |
| 0 | 0 | 0 | 2 | 2 |
| 2 | 1 | 1 | 2 | 2 |
| 2 | 1 | 1 | 2 | 2 |
| 2 | 1 | 2 | 2 | 2 |
| 2 | 0 | 2 | 2 | 2 |
| 0 | 0 | 0 | 0 | 0 |

|    |   |   |   |   |   |   |   |   |
|----|---|---|---|---|---|---|---|---|
| 1  |   |   |   |   |   |   |   |   |
| 2  | 7 | 4 | 1 | 0 | 2 | 0 | 0 | 2 |
| 3  | 7 | 4 | 5 | 2 | 2 | 0 | 0 | 2 |
| 4  | 7 | 4 | 4 | 1 | 1 | 2 | 2 | 2 |
| 5  | 7 | 5 | 4 | 2 | 1 | 2 | 2 | 2 |
| 6  | 7 | 4 | 1 | 0 | 2 | 2 | 1 | 0 |
| 7  |   |   |   |   |   |   |   |   |
| 8  | 5 | 5 | 7 | 2 | 0 | 2 | 0 | 2 |
| 9  | 5 | 4 | 2 | 1 | 0 | 0 | 2 | 2 |
| 10 | 7 | 5 | 1 | 1 | 0 | 2 | 0 | 2 |
| 11 | 7 | 1 | 1 | 1 | 2 | 2 | 2 | 2 |
| 12 |   |   |   |   |   |   |   |   |
| 13 | 6 | 5 | 1 | 1 | 0 | 2 | 2 | 2 |
| 14 | 7 | 6 | 1 | 1 | 2 | 2 | 2 | 2 |
| 15 | 7 | 4 | 5 | 0 | 1 | 1 | 2 | 2 |
| 16 | 6 | 5 | 3 | 0 | 0 | 2 | 2 | 2 |
| 17 | 7 | 4 | 5 | 2 | 2 | 2 | 2 | 2 |
| 18 |   |   |   |   |   |   |   |   |
| 19 | 6 | 6 | 1 | 0 | 0 | 1 | 1 | 1 |
| 20 | 7 | 4 | 1 | 2 | 2 | 1 | 2 | 2 |
| 21 | 7 | 4 | 4 | 2 | 2 | 2 | 2 | 2 |
| 22 | 5 | 4 | 4 | 2 | 0 | 2 | 2 | 2 |
| 23 | 7 | 4 | 4 | 2 | 1 | 2 | 1 | 1 |
| 24 |   |   |   |   |   |   |   |   |
| 25 | 6 | 5 | 2 | 0 | 2 | 2 | 2 | 0 |
| 26 | 7 | 5 | 1 | 2 | 0 | 2 | 2 | 2 |
| 27 | 6 | 4 | 3 | 1 | 1 | 1 | 2 | 2 |
| 28 | 7 | 4 | 4 | 1 | 1 | 2 | 2 | 2 |
| 29 | 7 | 7 | 1 | 0 | 2 | 1 | 1 | 2 |
| 30 | 5 | 3 | 3 | 2 | 0 | 2 | 1 | 0 |
| 31 | 7 | 6 | 2 | 2 | 0 | 1 | 0 | 2 |
| 32 | 7 | 5 | 1 | 2 | 2 | 2 | 1 | 2 |
| 33 | 7 | 4 | 1 | 2 | 0 | 2 | 2 | 2 |
| 34 | 7 | 4 | 4 | 2 | 0 | 0 | 2 | 2 |
| 35 | 7 | 4 | 4 | 2 | 2 | 2 | 2 | 2 |
| 36 | 7 | 4 | 1 | 2 | 2 | 2 | 2 | 2 |
| 37 |   |   |   |   |   |   |   |   |
| 38 | 6 | 6 | 4 | 0 | 1 | 0 | 1 | 2 |
| 39 | 7 | 4 | 5 | 2 | 0 | 0 | 2 | 2 |
| 40 | 6 | 4 | 3 | 1 | 1 | 1 | 2 | 1 |
| 41 | 7 | 1 | 5 | 2 | 2 | 2 | 2 | 2 |
| 42 | 7 | 6 | 2 | 2 | 2 | 2 | 2 | 2 |
| 43 | 7 | 4 | 7 | 0 | 2 | 1 | 2 | 2 |
| 44 | 7 | 6 | 2 | 2 | 0 | 2 | 2 | 2 |
| 45 | 7 | 5 | 1 | 1 | 1 | 2 | 2 | 2 |
| 46 | 7 | 5 | 2 | 2 | 2 | 2 | 2 | 2 |
| 47 |   |   |   |   |   |   |   |   |
| 48 | 7 | 4 | 2 | 1 | 0 | 1 | 2 | 2 |
| 49 | 4 | 4 | 5 | 2 | 0 | 1 | 1 | 0 |
| 50 | 7 | 4 | 1 | 2 | 0 | 2 | 2 | 2 |
| 51 | 7 | 6 | 2 | 1 | 0 | 2 | 2 | 2 |
| 52 |   |   |   |   |   |   |   |   |
| 53 | 6 | 6 | 2 | 0 | 0 | 0 | 1 | 2 |
| 54 | 7 | 4 | 6 | 0 | 1 | 2 | 1 | 2 |
| 55 | 7 | 6 | 6 | 1 | 0 | 2 | 2 | 2 |
| 56 | 7 | 1 | 1 | 1 | 2 | 2 | 2 | 2 |
| 57 |   |   |   |   |   |   |   |   |
| 58 |   |   |   |   |   |   |   |   |
| 59 |   |   |   |   |   |   |   |   |
| 60 |   |   |   |   |   |   |   |   |

**ADJACENT ANSWER; 0 - ALL OTHER ANSWERS)**

|    | 6 | 7 | 8 | 9 | 10 | 11 | 12 | 13 | 14 |
|----|---|---|---|---|----|----|----|----|----|
| 1  | 1 | 0 | 2 | 2 | 2  | 2  | 1  | 1  | 2  |
| 2  | 2 | 0 | 2 | 1 | 2  | 1  | 2  | 0  | 0  |
| 3  | 2 | 2 | 2 | 2 | 2  | 2  | 1  | 1  | 2  |
| 4  | 1 | 0 | 0 | 2 | 0  | 0  | 0  | 1  | 0  |
| 5  | 2 | 2 | 2 | 2 | 2  | 2  | 1  | 1  | 0  |
| 6  | 2 | 2 | 2 | 2 | 2  | 2  | 1  | 2  | 0  |
| 7  | 2 | 1 | 2 | 2 | 2  | 2  | 1  | 1  | 0  |
| 8  | 2 | 0 | 2 | 2 | 2  | 2  | 1  | 1  | 0  |
| 9  | 1 | 0 | 2 | 2 | 1  | 0  | 0  | 1  | 0  |
| 10 | 0 | 0 | 2 | 0 | 0  | 0  | 2  | 1  | 0  |
| 11 | 2 | 0 | 0 | 2 | 1  | 1  | 2  | 1  | 0  |
| 12 | 2 | 0 | 0 | 2 | 2  | 1  | 2  | 2  | 0  |
| 13 | 2 | 0 | 1 | 2 | 2  | 2  | 1  | 0  | 0  |
| 14 | 2 | 2 | 2 | 2 | 2  | 1  | 1  | 1  | 2  |
| 15 | 1 | 0 | 0 | 2 | 2  | 2  | 2  | 0  | 1  |
| 16 | 2 | 2 | 2 | 2 | 2  | 2  | 1  | 1  | 1  |
| 17 | 2 | 2 | 0 | 2 | 2  | 0  | 1  | 2  | 1  |
| 18 | 2 | 1 | 2 | 2 | 2  | 2  | 2  | 2  | 0  |
| 19 | 1 | 0 | 2 | 2 | 1  | 0  | 2  | 1  | 0  |
| 20 | 0 | 0 | 0 | 0 | 0  | 0  | 0  | 1  | 1  |
| 21 | 2 | 2 | 0 | 2 | 2  | 2  | 1  | 1  | 2  |
| 22 | 1 | 1 | 1 | 0 | 0  | 0  | 1  | 2  | 0  |
| 23 | 2 | 2 | 2 | 2 | 2  | 2  | 1  | 1  | 2  |
| 24 | 0 | 0 | 1 | 2 | 2  | 2  | 1  | 1  | 2  |
| 25 | 2 | 1 | 1 | 2 | 0  | 2  | 1  | 1  | 2  |
| 26 | 2 | 1 | 1 | 2 | 1  | 2  | 2  | 2  | 0  |
| 27 | 2 | 0 | 0 | 2 | 2  | 2  | 1  | 0  | 2  |
| 28 | 2 | 2 | 1 | 1 | 1  | 1  | 2  | 1  | 0  |
| 29 | 2 | 0 | 1 | 2 | 0  | 0  | 1  | 2  | 2  |
| 30 | 2 | 0 | 0 | 2 | 1  | 1  | 0  | 2  | 2  |
| 31 | 0 | 0 | 0 | 0 | 0  | 2  | 0  | 1  | 0  |
| 32 | 2 | 0 | 1 | 2 | 0  | 1  | 2  | 2  | 0  |
| 33 | 2 | 2 | 2 | 2 | 2  | 2  | 1  | 0  | 0  |
| 34 | 0 | 0 | 0 | 0 | 1  | 0  | 1  | 2  | 1  |
| 35 | 1 | 1 | 2 | 2 | 1  | 2  | 1  | 1  | 0  |
| 36 | 2 | 2 | 2 | 2 | 2  | 2  | 1  | 0  | 0  |
| 37 | 2 | 2 | 2 | 2 | 2  | 1  | 1  | 1  | 0  |
| 38 | 1 | 1 | 1 | 0 | 0  | 0  | 1  | 2  | 0  |
| 39 | 2 | 2 | 2 | 2 | 2  | 2  | 1  | 1  | 2  |
| 40 | 0 | 0 | 1 | 2 | 2  | 2  | 1  | 1  | 2  |
| 41 | 2 | 1 | 1 | 2 | 0  | 2  | 1  | 1  | 2  |
| 42 | 2 | 1 | 1 | 2 | 1  | 2  | 2  | 2  | 0  |
| 43 | 2 | 0 | 0 | 2 | 2  | 2  | 1  | 0  | 2  |
| 44 | 2 | 2 | 1 | 1 | 1  | 1  | 2  | 1  | 0  |
| 45 | 2 | 2 | 2 | 2 | 2  | 1  | 1  | 1  | 0  |
| 46 | 2 | 0 | 1 | 2 | 0  | 0  | 1  | 2  | 2  |
| 47 | 2 | 0 | 0 | 2 | 1  | 1  | 0  | 2  | 2  |
| 48 | 0 | 0 | 0 | 0 | 0  | 2  | 0  | 1  | 0  |
| 49 | 2 | 0 | 1 | 2 | 0  | 1  | 2  | 2  | 0  |
| 50 | 2 | 2 | 2 | 2 | 2  | 2  | 1  | 0  | 0  |
| 51 | 0 | 0 | 0 | 0 | 1  | 0  | 1  | 2  | 1  |
| 52 | 1 | 1 | 2 | 2 | 1  | 2  | 1  | 1  | 0  |
| 53 | 1 | 0 | 2 | 0 | 0  | 2  | 1  | 2  | 0  |
| 54 | 2 | 2 | 2 | 2 | 2  | 2  | 1  | 2  | 1  |
| 55 | 2 | 2 | 2 | 2 | 2  | 2  | 1  | 1  | 0  |
| 56 | 2 | 0 | 2 | 2 | 2  | 2  | 1  | 1  | 0  |
| 57 | 0 | 0 | 0 | 2 | 2  | 2  | 2  | 0  | 1  |



|    |   |   |   |   |   |   |   |   |   |
|----|---|---|---|---|---|---|---|---|---|
| 1  |   |   |   |   |   |   |   |   |   |
| 2  | 0 | 2 | 1 | 0 | 2 | 2 | 1 | 1 | 0 |
| 3  | 1 | 0 | 0 | 1 | 1 | 2 | 2 | 1 | 0 |
| 4  | 2 | 1 | 1 | 2 | 2 | 2 | 2 | 0 | 0 |
| 5  | 2 | 2 | 0 | 2 | 2 | 2 | 1 | 2 | 0 |
| 6  | 1 | 1 | 1 | 2 | 2 | 1 | 2 | 1 | 0 |
| 7  | 0 | 1 | 0 | 2 | 1 | 2 | 1 | 2 | 1 |
| 8  | 2 | 1 | 0 | 1 | 1 | 0 | 2 | 1 | 0 |
| 9  | 2 | 1 | 2 | 2 | 2 | 2 | 2 | 1 | 1 |
| 10 | 2 | 0 | 0 | 2 | 1 | 1 | 1 | 1 | 0 |
| 11 | 2 | 0 | 0 | 2 | 1 | 1 | 1 | 1 | 0 |
| 12 | 1 | 1 | 2 | 1 | 2 | 2 | 2 | 1 | 2 |
| 13 | 2 | 0 | 0 | 2 | 1 | 1 | 1 | 1 | 0 |
| 14 | 2 | 2 | 0 | 1 | 2 | 1 | 2 | 1 | 0 |
| 15 | 2 | 2 | 0 | 1 | 2 | 2 | 2 | 2 | 0 |
| 16 | 2 | 0 | 2 | 2 | 2 | 0 | 2 | 0 | 0 |
| 17 | 2 | 0 | 2 | 1 | 2 | 1 | 2 | 2 | 0 |
| 18 | 0 | 0 | 2 | 2 | 2 | 2 | 1 | 1 | 0 |
| 19 | 2 | 0 | 2 | 2 | 2 | 2 | 1 | 1 | 0 |
| 20 | 2 | 2 | 2 | 2 | 2 | 2 | 1 | 1 | 0 |
| 21 | 2 | 2 | 2 | 2 | 2 | 2 | 1 | 1 | 0 |
| 22 | 2 | 0 | 2 | 1 | 2 | 2 | 1 | 1 | 2 |
| 23 | 2 | 1 | 0 | 2 | 2 | 2 | 1 | 2 | 1 |
| 24 | 2 | 0 | 0 | 1 | 2 | 1 | 2 | 2 | 0 |
| 25 | 2 | 1 | 2 | 2 | 2 | 0 | 2 | 1 | 0 |
| 26 | 2 | 2 | 2 | 2 | 2 | 2 | 1 | 1 | 0 |
| 27 | 2 | 0 | 0 | 2 | 1 | 2 | 0 | 2 | 0 |
| 28 | 2 | 0 | 1 | 2 | 1 | 2 | 1 | 0 | 0 |
| 29 | 2 | 0 | 0 | 0 | 1 | 0 | 0 | 1 | 1 |
| 30 | 2 | 0 | 0 | 2 | 2 | 0 | 1 | 1 | 0 |
| 31 | 1 | 0 | 0 | 2 | 2 | 2 | 2 | 2 | 0 |
| 32 | 2 | 1 | 0 | 2 | 2 | 2 | 2 | 2 | 0 |
| 33 | 2 | 2 | 1 | 2 | 2 | 2 | 1 | 1 | 2 |
| 34 | 2 | 2 | 2 | 2 | 2 | 2 | 1 | 2 | 2 |
| 35 | 2 | 2 | 2 | 2 | 2 | 2 | 1 | 1 | 2 |
| 36 | 2 | 2 | 2 | 2 | 2 | 2 | 1 | 1 | 2 |
| 37 | 0 | 0 | 0 | 2 | 0 | 1 | 1 | 1 | 1 |
| 38 | 2 | 2 | 2 | 2 | 1 | 2 | 1 | 2 | 0 |
| 39 | 0 | 1 | 0 | 2 | 1 | 1 | 2 | 1 | 0 |
| 40 | 1 | 1 | 1 | 2 | 2 | 2 | 1 | 1 | 0 |
| 41 | 1 | 1 | 1 | 1 | 1 | 1 | 2 | 2 | 0 |
| 42 | 1 | 1 | 1 | 1 | 1 | 1 | 2 | 2 | 0 |
| 43 | 2 | 2 | 1 | 2 | 2 | 2 | 1 | 2 | 0 |
| 44 | 2 | 2 | 0 | 2 | 2 | 2 | 1 | 1 | 1 |
| 45 | 2 | 2 | 0 | 2 | 2 | 2 | 2 | 1 | 1 |
| 46 | 2 | 2 | 0 | 2 | 2 | 2 | 2 | 1 | 1 |
| 47 | 1 | 1 | 2 | 2 | 1 | 1 | 1 | 0 | 2 |
| 48 | 1 | 1 | 1 | 2 | 2 | 0 | 1 | 1 | 1 |
| 49 | 2 | 0 | 0 | 1 | 0 | 1 | 0 | 0 | 0 |
| 50 | 2 | 0 | 0 | 2 | 0 | 2 | 0 | 0 | 2 |
| 51 | 1 | 1 | 1 | 2 | 2 | 2 | 1 | 1 | 0 |
| 52 | 2 | 1 | 1 | 2 | 1 | 2 | 2 | 2 | 0 |
| 53 | 1 | 0 | 0 | 1 | 0 | 2 | 2 | 2 | 0 |
| 54 | 2 | 0 | 2 | 2 | 0 | 2 | 2 | 1 | 0 |
| 55 | 2 | 0 | 0 | 2 | 1 | 1 | 1 | 1 | 0 |
| 56 | 2 | 0 | 0 | 2 | 1 | 1 | 1 | 1 | 0 |
| 57 | 2 | 0 | 0 | 2 | 1 | 1 | 1 | 1 | 0 |
| 58 |   |   |   |   |   |   |   |   |   |
| 59 |   |   |   |   |   |   |   |   |   |
| 60 |   |   |   |   |   |   |   |   |   |

1  
2  
3  
4  
5  
6  
7  
8  
9  
10  
11  
12  
13  
14  
15  
16  
17  
18  
19  
20  
21  
22  
23  
24  
25  
26  
27  
28  
29  
30  
31  
32  
33  
34  
35  
36  
37  
38  
39  
40  
41  
42  
43  
44  
45  
46  
47  
48  
49  
50  
51  
52  
53  
54  
55  
56  
57  
58  
59  
60

| 15 | 16 | 17 | 18 | 19 | 20 | 21 | 22 | 23 |
|----|----|----|----|----|----|----|----|----|
| 0  | 0  | 2  | 2  | 0  | 1  | 0  | 2  | 2  |
| 0  | 0  | 1  | 1  | 0  | 0  | 2  | 1  | 0  |
| 2  | 0  | 2  | 1  | 1  | 1  | 1  | 1  | 0  |
| 0  | 0  | 1  | 0  | 1  | 1  | 2  | 1  | 0  |
| 0  | 0  | 2  | 2  | 0  | 0  | 2  | 1  | 0  |
| 0  | 0  | 2  | 1  | 0  | 0  | 1  | 1  | 0  |
| 1  | 0  | 2  | 1  | 0  | 0  | 2  | 1  | 0  |
| 0  | 1  | 2  | 0  | 1  | 0  | 1  | 2  | 2  |
| 1  | 0  | 2  | 0  | 2  | 1  | 1  | 2  | 1  |
| 2  | 0  | 2  | 0  | 0  | 0  | 2  | 1  | 0  |
| 1  | 0  | 2  | 1  | 1  | 0  | 2  | 0  | 2  |
| 1  | 0  | 1  | 0  | 0  | 0  | 1  | 1  | 0  |
| 2  | 1  | 2  | 0  | 0  | 0  | 2  | 2  | 1  |
| 1  | 0  | 2  | 1  | 0  | 1  | 0  | 2  | 0  |
| 0  | 0  | 2  | 0  | 0  | 1  | 0  | 0  | 2  |
| 0  | 0  | 2  | 2  | 2  | 1  | 1  | 1  | 2  |
| 1  | 0  | 0  | 1  | 0  | 2  | 1  | 1  | 1  |
| 2  | 0  | 2  | 0  | 1  | 1  | 1  | 2  | 2  |
| 0  | 0  | 2  | 1  | 2  | 1  | 2  | 0  | 0  |
| 0  | 0  | 2  | 0  | 0  | 1  | 0  | 2  | 2  |
| 1  | 0  | 2  | 0  | 1  | 2  | 2  | 1  | 0  |
| 1  | 0  | 2  | 0  | 0  | 0  | 2  | 1  | 0  |
| 0  | 0  | 1  | 1  | 0  | 0  | 1  | 1  | 2  |
| 0  | 0  | 2  | 1  | 0  | 0  | 0  | 0  | 2  |
| 0  | 0  | 2  | 1  | 0  | 1  | 1  | 0  | 0  |
| 2  | 0  | 2  | 1  | 0  | 1  | 1  | 2  | 0  |
| 2  | 2  | 0  | 0  | 0  | 0  | 1  | 2  | 2  |
| 1  | 0  | 1  | 2  | 0  | 1  | 1  | 2  | 0  |
| 2  | 0  | 1  | 1  | 0  | 0  | 1  | 2  | 0  |
| 0  | 0  | 0  | 2  | 0  | 1  | 2  | 0  | 0  |
| 1  | 0  | 2  | 2  | 1  | 0  | 2  | 0  | 2  |
| 0  | 0  | 0  | 0  | 0  | 1  | 2  | 0  | 0  |
| 1  | 0  | 2  | 0  | 0  | 0  | 2  | 1  | 0  |
| 1  | 0  | 2  | 1  | 0  | 0  | 1  | 0  | 2  |
| 0  | 0  | 1  | 1  | 0  | 2  | 1  | 2  | 0  |
| 1  | 0  | 0  | 0  | 1  | 0  | 0  | 0  | 2  |
| 0  | 0  | 1  | 0  | 0  | 1  | 1  | 2  | 0  |
| 0  | 0  | 2  | 1  | 2  | 0  | 0  | 2  | 2  |
| 2  | 0  | 1  | 2  | 1  | 2  | 0  | 1  | 1  |
| 0  | 0  | 1  | 0  | 0  | 1  | 1  | 0  | 0  |
| 0  | 0  | 2  | 0  | 0  | 1  | 0  | 0  | 2  |

|    |   |   |   |   |   |   |   |   |   |
|----|---|---|---|---|---|---|---|---|---|
| 1  |   |   |   |   |   |   |   |   |   |
| 2  | 0 | 0 | 1 | 0 | 0 | 2 | 1 | 0 | 0 |
| 3  | 0 | 0 | 1 | 0 | 1 | 0 | 2 | 2 | 0 |
| 4  | 0 | 0 | 2 | 0 | 0 | 2 | 0 | 0 | 2 |
| 5  | 2 | 2 | 1 | 1 | 0 | 1 | 0 | 1 | 2 |
| 6  | 0 | 1 | 2 | 1 | 2 | 0 | 2 | 1 | 0 |
| 7  | 2 | 2 | 2 | 0 | 2 | 1 | 2 | 2 | 0 |
| 8  | 0 | 0 | 2 | 0 | 2 | 1 | 2 | 2 | 1 |
| 9  | 0 | 0 | 1 | 2 | 0 | 0 | 2 | 2 | 0 |
| 10 | 1 | 0 | 1 | 2 | 0 | 1 | 1 | 0 | 0 |
| 11 | 0 | 0 | 1 | 2 | 0 | 0 | 2 | 2 | 0 |
| 12 | 1 | 0 | 1 | 2 | 0 | 1 | 1 | 0 | 0 |
| 13 | 0 | 0 | 1 | 1 | 0 | 0 | 1 | 0 | 1 |
| 14 | 1 | 0 | 1 | 0 | 0 | 0 | 2 | 0 | 0 |
| 15 | 0 | 0 | 1 | 1 | 0 | 0 | 1 | 0 | 1 |
| 16 | 1 | 0 | 1 | 0 | 0 | 0 | 2 | 0 | 0 |
| 17 | 2 | 0 | 1 | 2 | 0 | 0 | 1 | 2 | 2 |
| 18 | 2 | 0 | 1 | 0 | 0 | 0 | 2 | 0 | 0 |
| 19 | 1 | 0 | 1 | 1 | 0 | 0 | 1 | 2 | 0 |
| 20 | 1 | 1 | 1 | 2 | 2 | 1 | 1 | 2 | 2 |
| 21 | 2 | 0 | 1 | 1 | 0 | 1 | 2 | 2 | 0 |
| 22 | 2 | 0 | 1 | 2 | 0 | 1 | 2 | 2 | 1 |
| 23 | 0 | 0 | 1 | 1 | 0 | 0 | 1 | 1 | 2 |
| 24 | 1 | 0 | 1 | 1 | 1 | 0 | 0 | 1 | 2 |
| 25 | 2 | 0 | 1 | 2 | 0 | 0 | 1 | 2 | 0 |
| 26 | 0 | 0 | 0 | 1 | 2 | 1 | 1 | 2 | 1 |
| 27 | 2 | 0 | 1 | 0 | 0 | 2 | 2 | 0 | 0 |
| 28 | 1 | 2 | 2 | 0 | 2 | 1 | 2 | 1 | 1 |
| 29 | 2 | 0 | 1 | 1 | 2 | 0 | 2 | 0 | 2 |
| 30 | 2 | 0 | 2 | 2 | 1 | 1 | 0 | 1 | 2 |
| 31 | 2 | 0 | 1 | 0 | 1 | 1 | 1 | 0 | 2 |
| 32 | 2 | 0 | 1 | 1 | 1 | 0 | 1 | 0 | 2 |
| 33 | 2 | 0 | 1 | 1 | 1 | 1 | 2 | 2 | 2 |
| 34 | 2 | 0 | 1 | 0 | 1 | 1 | 2 | 2 | 2 |
| 35 | 2 | 0 | 1 | 1 | 1 | 1 | 2 | 2 | 2 |
| 36 | 2 | 2 | 1 | 0 | 1 | 1 | 1 | 0 | 0 |
| 37 | 2 | 0 | 2 | 0 | 0 | 1 | 1 | 0 | 0 |
| 38 | 2 | 1 | 1 | 1 | 1 | 0 | 1 | 0 | 2 |
| 39 | 1 | 1 | 2 | 0 | 2 | 2 | 2 | 0 | 0 |
| 40 | 0 | 0 | 2 | 1 | 1 | 0 | 1 | 2 | 1 |
| 41 | 1 | 0 | 1 | 1 | 0 | 0 | 1 | 1 | 0 |
| 42 | 2 | 0 | 0 | 0 | 0 | 1 | 0 | 0 | 0 |
| 43 | 1 | 0 | 1 | 2 | 1 | 2 | 0 | 0 | 1 |
| 44 | 0 | 0 | 2 | 2 | 0 | 1 | 0 | 2 | 2 |
| 45 | 0 | 2 | 2 | 2 | 1 | 1 | 1 | 1 | 2 |
| 46 | 0 | 0 | 0 | 0 | 0 | 2 | 0 | 1 | 0 |
| 47 | 0 | 0 | 2 | 1 | 0 | 1 | 2 | 0 | 1 |
| 48 | 0 | 0 | 1 | 2 | 1 | 0 | 0 | 2 | 0 |
| 49 | 2 | 0 | 0 | 2 | 2 | 1 | 1 | 0 | 1 |
| 50 | 0 | 0 | 1 | 2 | 1 | 1 | 2 | 1 | 1 |
| 51 | 2 | 0 | 1 | 1 | 0 | 0 | 1 | 2 | 0 |
| 52 | 2 | 0 | 2 | 0 | 0 | 0 | 1 | 2 | 0 |
| 53 | 1 | 0 | 1 | 2 | 0 | 1 | 1 | 0 | 0 |
| 54 | 0 | 0 | 2 | 0 | 0 | 0 | 1 | 2 | 0 |
| 55 | 2 | 0 | 2 | 0 | 0 | 0 | 1 | 2 | 0 |
| 56 | 1 | 0 | 1 | 2 | 0 | 1 | 1 | 0 | 0 |
| 57 |   |   |   |   |   |   |   |   |   |
| 58 |   |   |   |   |   |   |   |   |   |
| 59 |   |   |   |   |   |   |   |   |   |
| 60 |   |   |   |   |   |   |   |   |   |

1  
2  
3  
4  
5  
6  
7  
8  
9  
10  
11  
12  
13  
14  
15  
16  
17  
18  
19  
20  
21  
22  
23  
24  
25  
26  
27  
28  
29  
30  
31  
32  
33  
34  
35  
36  
37  
38  
39  
40  
41  
42  
43  
44  
45  
46  
47  
48  
49  
50  
51  
52  
53  
54  
55  
56  
57  
58  
59  
60

|  | 24 | 25 | 26 | 27 | 28 | 29 | 30 | 31 | 32 |
|--|----|----|----|----|----|----|----|----|----|
|  | 0  | 2  | 2  | 2  | 0  | 0  | 0  | 0  | 0  |
|  | 0  | 2  | 2  | 1  | 1  | 2  | 0  | 0  | 2  |
|  | 2  | 2  | 2  | 2  | 2  | 2  | 2  | 0  | 2  |
|  | 0  | 2  | 2  | 0  | 0  | 0  | 1  | 0  | 2  |
|  | 2  | 2  | 2  | 2  | 0  | 2  | 0  | 0  | 0  |
|  | 0  | 2  | 2  | 2  | 0  | 0  | 0  | 0  | 0  |
|  | 2  | 1  | 1  | 1  | 0  | 1  | 0  | 0  | 1  |
|  | 2  | 1  | 2  | 2  | 2  | 2  | 0  | 0  | 2  |
|  | 1  | 1  | 2  | 2  | 2  | 2  | 0  | 2  | 0  |
|  | 0  | 0  | 0  | 1  | 1  | 1  | 0  | 2  | 0  |
|  | 1  | 1  | 1  | 2  | 2  | 1  | 0  | 2  | 2  |
|  | 0  | 2  | 2  | 0  | 0  | 2  | 0  | 0  | 2  |
|  | 2  | 2  | 2  | 1  | 2  | 2  | 2  | 0  | 2  |
|  | 0  | 2  | 2  | 2  | 0  | 1  | 0  | 0  | 2  |
|  | 2  | 0  | 2  | 2  | 1  | 2  | 2  | 0  | 1  |
|  | 2  | 2  | 2  | 1  | 0  | 2  | 0  | 0  | 1  |
|  | 1  | 2  | 2  | 2  | 0  | 0  | 0  | 0  | 2  |
|  | 0  | 2  | 2  | 2  | 0  | 2  | 0  | 0  | 2  |
|  | 0  | 2  | 2  | 0  | 0  | 0  | 1  | 0  | 2  |
|  | 0  | 2  | 0  | 2  | 0  | 0  | 0  | 1  | 0  |
|  | 0  | 2  | 2  | 0  | 1  | 2  | 1  | 0  | 2  |
|  | 0  | 1  | 1  | 0  | 0  | 0  | 0  | 0  | 1  |
|  | 0  | 2  | 2  | 2  | 0  | 0  | 0  | 0  | 2  |
|  | 0  | 2  | 2  | 2  | 0  | 0  | 0  | 1  | 0  |
|  | 2  | 2  | 0  | 2  | 1  | 2  | 2  | 0  | 1  |
|  | 2  | 1  | 1  | 0  | 2  | 2  | 0  | 0  | 2  |
|  | 2  | 1  | 0  | 2  | 2  | 2  | 0  | 0  | 2  |
|  | 1  | 2  | 2  | 2  | 2  | 2  | 0  | 2  | 2  |
|  | 0  | 1  | 1  | 0  | 1  | 1  | 0  | 0  | 2  |
|  | 1  | 2  | 2  | 2  | 1  | 2  | 0  | 0  | 2  |
|  | 2  | 0  | 0  | 2  | 2  | 2  | 0  | 2  | 2  |
|  | 0  | 2  | 2  | 2  | 0  | 0  | 0  | 0  | 0  |
|  | 0  | 1  | 1  | 2  | 0  | 2  | 0  | 0  | 0  |
|  | 2  | 2  | 2  | 2  | 2  | 2  | 0  | 2  | 0  |
|  | 0  | 1  | 1  | 0  | 0  | 0  | 0  | 0  | 2  |
|  | 2  | 2  | 2  | 2  | 2  | 2  | 0  | 0  | 2  |
|  | 2  | 2  | 2  | 0  | 0  | 2  | 2  | 0  | 2  |
|  | 2  | 2  | 2  | 2  | 2  | 2  | 2  | 0  | 2  |
|  | 0  | 2  | 2  | 2  | 0  | 0  | 1  | 0  | 2  |
|  | 0  | 2  | 2  | 2  | 0  | 0  | 0  | 0  | 2  |
|  | 2  | 0  | 2  | 2  | 1  | 2  | 2  | 0  | 1  |

|    |   |   |   |   |   |   |   |   |   |
|----|---|---|---|---|---|---|---|---|---|
| 1  |   |   |   |   |   |   |   |   |   |
| 2  | 0 | 0 | 2 | 2 | 0 | 2 | 0 | 0 | 2 |
| 3  | 0 | 0 | 0 | 0 | 0 | 0 | 0 | 0 | 2 |
| 4  | 2 | 2 | 2 | 2 | 0 | 2 | 2 | 0 | 2 |
| 5  | 1 | 2 | 2 | 2 | 0 | 0 | 0 | 2 | 2 |
| 6  | 2 | 0 | 0 | 2 | 1 | 2 | 1 | 0 | 2 |
| 7  | 0 | 2 | 1 | 2 | 0 | 2 | 0 | 0 | 0 |
| 8  | 0 | 2 | 2 | 0 | 0 | 0 | 0 | 0 | 1 |
| 9  | 0 | 2 | 2 | 1 | 0 | 1 | 0 | 2 | 0 |
| 10 | 2 | 0 | 0 | 2 | 2 | 2 | 0 | 2 | 2 |
| 11 | 2 | 2 | 2 | 0 | 0 | 2 | 0 | 2 | 0 |
| 12 | 2 | 0 | 0 | 2 | 2 | 2 | 0 | 2 | 2 |
| 13 | 2 | 0 | 0 | 0 | 0 | 2 | 1 | 0 | 2 |
| 14 | 0 | 1 | 2 | 0 | 0 | 0 | 0 | 0 | 2 |
| 15 | 0 | 2 | 1 | 2 | 0 | 0 | 2 | 0 | 2 |
| 16 | 0 | 1 | 1 | 0 | 0 | 0 | 0 | 0 | 1 |
| 17 | 0 | 1 | 1 | 2 | 0 | 2 | 0 | 2 | 2 |
| 18 | 0 | 1 | 1 | 0 | 0 | 0 | 0 | 0 | 1 |
| 19 | 0 | 1 | 1 | 2 | 0 | 2 | 0 | 2 | 2 |
| 20 | 2 | 2 | 2 | 0 | 2 | 2 | 0 | 0 | 2 |
| 21 | 1 | 2 | 2 | 2 | 0 | 1 | 1 | 0 | 1 |
| 22 | 2 | 2 | 2 | 2 | 0 | 2 | 1 | 0 | 2 |
| 23 | 1 | 2 | 2 | 2 | 0 | 2 | 0 | 1 | 2 |
| 24 | 1 | 1 | 1 | 2 | 2 | 1 | 0 | 0 | 0 |
| 25 | 2 | 2 | 2 | 1 | 1 | 2 | 0 | 0 | 2 |
| 26 | 2 | 2 | 0 | 2 | 1 | 2 | 0 | 0 | 1 |
| 27 | 2 | 2 | 0 | 0 | 0 | 2 | 0 | 0 | 2 |
| 28 | 2 | 2 | 0 | 0 | 0 | 2 | 0 | 0 | 2 |
| 29 | 2 | 1 | 1 | 2 | 2 | 2 | 1 | 0 | 2 |
| 30 | 2 | 2 | 2 | 0 | 0 | 2 | 0 | 2 | 2 |
| 31 | 1 | 2 | 2 | 2 | 0 | 2 | 0 | 2 | 0 |
| 32 | 2 | 2 | 2 | 2 | 0 | 2 | 0 | 0 | 2 |
| 33 | 1 | 2 | 2 | 2 | 0 | 2 | 0 | 0 | 2 |
| 34 | 1 | 2 | 2 | 2 | 0 | 2 | 0 | 0 | 2 |
| 35 | 2 | 2 | 2 | 2 | 0 | 2 | 0 | 0 | 2 |
| 36 | 2 | 2 | 2 | 2 | 0 | 2 | 0 | 0 | 2 |
| 37 | 1 | 0 | 0 | 0 | 0 | 0 | 0 | 0 | 1 |
| 38 | 2 | 2 | 2 | 2 | 0 | 1 | 0 | 0 | 0 |
| 39 | 1 | 0 | 0 | 2 | 1 | 2 | 1 | 0 | 2 |
| 40 | 2 | 1 | 0 | 2 | 1 | 2 | 1 | 1 | 0 |
| 41 | 0 | 2 | 2 | 0 | 0 | 0 | 0 | 0 | 1 |
| 42 | 0 | 2 | 1 | 2 | 0 | 0 | 0 | 0 | 0 |
| 43 | 0 | 2 | 2 | 1 | 1 | 2 | 2 | 2 | 1 |
| 44 | 0 | 2 | 1 | 1 | 0 | 2 | 0 | 0 | 1 |
| 45 | 2 | 2 | 2 | 2 | 2 | 2 | 0 | 2 | 0 |
| 46 | 2 | 1 | 1 | 2 | 0 | 0 | 0 | 0 | 0 |
| 47 | 1 | 1 | 0 | 2 | 0 | 1 | 2 | 0 | 0 |
| 48 | 2 | 0 | 2 | 1 | 1 | 1 | 0 | 2 | 0 |
| 49 | 2 | 0 | 0 | 0 | 1 | 2 | 1 | 0 | 0 |
| 50 | 1 | 0 | 0 | 0 | 1 | 2 | 1 | 0 | 0 |
| 51 | 2 | 2 | 0 | 2 | 0 | 2 | 2 | 0 | 2 |
| 52 | 2 | 2 | 1 | 2 | 0 | 2 | 2 | 0 | 2 |
| 53 | 2 | 0 | 0 | 2 | 2 | 2 | 0 | 2 | 2 |
| 54 | 1 | 0 | 0 | 0 | 1 | 2 | 1 | 0 | 0 |
| 55 | 2 | 2 | 0 | 2 | 0 | 2 | 2 | 0 | 2 |
| 56 | 2 | 2 | 1 | 2 | 0 | 2 | 2 | 0 | 2 |
| 57 | 2 | 0 | 0 | 2 | 2 | 2 | 0 | 2 | 2 |
| 58 |   |   |   |   |   |   |   |   |   |
| 59 |   |   |   |   |   |   |   |   |   |
| 60 |   |   |   |   |   |   |   |   |   |

1  
2  
3  
4  
5  
6  
7  
8  
9  
10  
11  
12  
13  
14  
15  
16  
17  
18  
19  
20  
21  
22  
23  
24  
25  
26  
27  
28  
29  
30  
31  
32  
33  
34  
35  
36  
37  
38  
39  
40  
41  
42  
43  
44  
45  
46  
47  
48  
49  
50  
51  
52  
53  
54  
55  
56  
57  
58  
59  
60

|  | 33 | 34 | 35 | 36 | 37 | 38 | 39 | 40 |
|--|----|----|----|----|----|----|----|----|
|  | 2  | 2  | 0  | 0  | 1  | 1  | 0  | 0  |
|  | 0  | 2  | 2  | 0  | 2  | 2  | 2  | 2  |
|  | 2  | 2  | 0  | 2  | 1  | 1  | 1  | 0  |
|  | 1  | 2  | 1  | 0  | 1  | 1  | 2  | 0  |
|  | 0  | 0  | 1  | 0  | 1  | 1  | 0  | 0  |
|  | 0  | 0  | 0  | 0  | 1  | 1  | 2  | 0  |
|  | 1  | 0  | 1  | 1  | 2  | 2  | 0  | 0  |
|  | 0  | 2  | 0  | 2  | 1  | 1  | 2  | 2  |
|  | 2  | 2  | 0  | 2  | 1  | 1  | 0  | 0  |
|  | 2  | 2  | 1  | 1  | 1  | 1  | 2  | 0  |
|  | 0  | 0  | 2  | 2  | 1  | 1  | 0  | 0  |
|  | 1  | 2  | 0  | 0  | 1  | 1  | 0  | 2  |
|  | 0  | 2  | 0  | 0  | 1  | 1  | 0  | 0  |
|  | 2  | 2  | 1  | 1  | 1  | 1  | 1  | 2  |
|  | 1  | 1  | 0  | 2  | 2  | 2  | 2  | 0  |
|  | 1  | 1  | 2  | 0  | 1  | 1  | 0  | 1  |
|  | 0  | 1  | 0  | 0  | 2  | 2  | 2  | 0  |
|  | 2  | 2  | 0  | 1  | 2  | 2  | 2  | 0  |
|  | 0  | 0  | 2  | 1  | 2  | 2  | 2  | 0  |
|  | 2  | 0  | 1  | 0  | 2  | 2  | 0  | 0  |
|  | 0  | 1  | 1  | 0  | 1  | 1  | 0  | 1  |
|  | 0  | 0  | 0  | 0  | 2  | 2  | 1  | 0  |
|  | 1  | 2  | 1  | 0  | 1  | 1  | 0  | 2  |
|  | 2  | 2  | 0  | 0  | 2  | 1  | 0  | 0  |
|  | 2  | 2  | 1  | 1  | 2  | 2  | 1  | 0  |
|  | 2  | 2  | 0  | 0  | 2  | 2  | 2  | 0  |
|  | 2  | 2  | 2  | 0  | 1  | 1  | 1  | 0  |
|  | 2  | 2  | 0  | 0  | 0  | 1  | 2  | 0  |
|  | 2  | 2  | 1  | 1  | 1  | 1  | 2  | 1  |
|  | 0  | 1  | 0  | 0  | 1  | 1  | 1  | 1  |
|  | 2  | 2  | 0  | 0  | 0  | 0  | 2  | 2  |
|  | 2  | 2  | 0  | 0  | 1  | 1  | 1  | 2  |
|  | 0  | 0  | 0  | 0  | 2  | 2  | 0  | 0  |
|  | 2  | 2  | 0  | 0  | 2  | 2  | 2  | 2  |
|  | 0  | 0  | 1  | 2  | 1  | 2  | 1  | 0  |
|  | 0  | 2  | 0  | 0  | 1  | 1  | 2  | 0  |
|  | 2  | 2  | 2  | 0  | 2  | 1  | 2  | 1  |
|  | 2  | 2  | 0  | 0  | 1  | 1  | 2  | 2  |
|  | 0  | 0  | 0  | 2  | 1  | 1  | 2  | 1  |
|  | 0  | 2  | 2  | 0  | 1  | 1  | 2  | 0  |
|  | 1  | 1  | 0  | 2  | 2  | 2  | 2  | 0  |

|    |   |   |   |   |   |   |   |   |
|----|---|---|---|---|---|---|---|---|
| 1  |   |   |   |   |   |   |   |   |
| 2  | 0 | 2 | 0 | 2 | 1 | 1 | 2 | 2 |
| 3  | 0 | 1 | 0 | 0 | 1 | 1 | 2 | 0 |
| 4  | 2 | 2 | 2 | 2 | 1 | 1 | 2 | 0 |
| 5  | 1 | 2 | 1 | 2 | 1 | 1 | 1 | 0 |
| 6  | 0 | 1 | 1 | 1 | 1 | 1 | 2 | 2 |
| 7  | 2 | 2 | 0 | 1 | 2 | 1 | 1 | 0 |
| 8  | 0 | 2 | 1 | 2 | 2 | 1 | 2 | 1 |
| 9  | 1 | 1 | 2 | 1 | 1 | 1 | 1 | 2 |
| 10 | 2 | 2 | 0 | 1 | 1 | 1 | 0 | 2 |
| 11 | 0 | 1 | 2 | 1 | 1 | 2 | 1 | 2 |
| 12 | 2 | 2 | 0 | 1 | 1 | 1 | 0 | 2 |
| 13 | 2 | 2 | 0 | 0 | 1 | 1 | 2 | 0 |
| 14 | 0 | 0 | 1 | 2 | 2 | 2 | 1 | 0 |
| 15 | 0 | 2 | 1 | 0 | 1 | 1 | 2 | 0 |
| 16 | 1 | 0 | 0 | 1 | 2 | 2 | 0 | 2 |
| 17 | 0 | 1 | 2 | 2 | 1 | 1 | 2 | 2 |
| 18 | 2 | 2 | 2 | 1 | 2 | 2 | 2 | 0 |
| 19 | 2 | 2 | 2 | 1 | 2 | 2 | 2 | 0 |
| 20 | 0 | 0 | 0 | 0 | 2 | 2 | 1 | 1 |
| 21 | 2 | 2 | 2 | 1 | 2 | 1 | 1 | 2 |
| 22 | 0 | 1 | 1 | 1 | 2 | 2 | 2 | 0 |
| 23 | 2 | 2 | 0 | 0 | 1 | 1 | 2 | 0 |
| 24 | 0 | 0 | 0 | 0 | 2 | 2 | 1 | 1 |
| 25 | 2 | 2 | 2 | 1 | 2 | 1 | 1 | 2 |
| 26 | 0 | 1 | 1 | 1 | 2 | 2 | 2 | 0 |
| 27 | 2 | 2 | 0 | 0 | 1 | 1 | 2 | 0 |
| 28 | 0 | 0 | 1 | 0 | 1 | 1 | 0 | 2 |
| 29 | 2 | 2 | 0 | 0 | 1 | 1 | 1 | 0 |
| 30 | 2 | 1 | 0 | 1 | 1 | 1 | 0 | 1 |
| 31 | 1 | 0 | 0 | 0 | 1 | 1 | 1 | 2 |
| 32 | 0 | 2 | 2 | 0 | 1 | 1 | 2 | 2 |
| 33 | 1 | 2 | 2 | 2 | 1 | 1 | 2 | 0 |
| 34 | 1 | 1 | 2 | 0 | 1 | 1 | 2 | 2 |
| 35 | 1 | 0 | 0 | 0 | 2 | 2 | 0 | 0 |
| 36 | 1 | 0 | 2 | 0 | 2 | 1 | 2 | 0 |
| 37 | 1 | 1 | 0 | 0 | 2 | 2 | 2 | 0 |
| 38 | 1 | 1 | 0 | 0 | 1 | 1 | 0 | 0 |
| 39 | 1 | 1 | 1 | 1 | 1 | 1 | 0 | 1 |
| 40 | 0 | 0 | 2 | 0 | 1 | 1 | 2 | 0 |
| 41 | 2 | 2 | 0 | 0 | 1 | 1 | 0 | 1 |
| 42 | 2 | 2 | 0 | 1 | 1 | 1 | 1 | 2 |
| 43 | 1 | 2 | 0 | 0 | 1 | 1 | 1 | 1 |
| 44 | 0 | 0 | 0 | 0 | 1 | 1 | 2 | 1 |
| 45 | 2 | 2 | 1 | 1 | 0 | 0 | 2 | 0 |
| 46 | 2 | 0 | 0 | 0 | 1 | 1 | 2 | 2 |
| 47 | 2 | 2 | 0 | 0 | 1 | 1 | 0 | 1 |
| 48 | 2 | 2 | 2 | 0 | 2 | 2 | 0 | 1 |
| 49 | 0 | 2 | 0 | 2 | 1 | 1 | 2 | 0 |
| 50 | 1 | 2 | 0 | 2 | 1 | 1 | 0 | 0 |
| 51 | 1 | 2 | 0 | 1 | 1 | 1 | 0 | 2 |
| 52 |   |   |   |   |   |   |   |   |
| 53 |   |   |   |   |   |   |   |   |
| 54 |   |   |   |   |   |   |   |   |
| 55 |   |   |   |   |   |   |   |   |
| 56 |   |   |   |   |   |   |   |   |
| 57 |   |   |   |   |   |   |   |   |
| 58 |   |   |   |   |   |   |   |   |
| 59 |   |   |   |   |   |   |   |   |
| 60 |   |   |   |   |   |   |   |   |

1  
2  
3  
4  
5  
6  
7  
8  
9  
10  
11  
12  
13  
14  
15  
16  
17  
18  
19  
20  
21  
22  
23  
24  
25  
26  
27  
28  
29  
30  
31  
32  
33  
34  
35  
36  
37  
38  
39  
40  
41  
42  
43  
44  
45  
46  
47  
48  
49  
50  
51  
52  
53  
54  
55  
56  
57  
58  
59  
60

**SURVEY SCORE (PRE)**

|    |
|----|
| 39 |
| 45 |
| 58 |
| 31 |
| 42 |
| 36 |
| 44 |
| 52 |
| 45 |
| 35 |
| 45 |
| 36 |
| 46 |
| 52 |
| 44 |
| 53 |
| 42 |
| 53 |
| 38 |
| 26 |
| 44 |
| 23 |
| 45 |
| 35 |
| 46 |
| 50 |
| 48 |
| 50 |
| 47 |
| 39 |
| 47 |
| 29 |
| 33 |
| 55 |
| 29 |
| 39 |
| 45 |
| 59 |
| 49 |
| 39 |
| 36 |

**CLINIC**

|          |
|----------|
| <b>1</b> |
| 7        |
| 7        |
| 7        |
| 7        |
| 7        |
| 7        |
| 7        |
| 7        |
| 7        |
| 6        |
| 6        |
| 7        |
| 7        |
| 7        |
| 7        |
| 7        |
| 5        |
| 7        |
| 7        |
| 6        |
| 6        |
| 5        |
| 4        |
| 7        |
| 4        |
| 7        |
| 7        |
| 7        |
| 7        |
| 7        |
| 6        |
| 7        |
| 7        |
| 7        |
| 5        |
| 7        |
| 7        |
| 7        |
| 7        |
| 7        |
| 5        |



|    |    |   |
|----|----|---|
| 1  |    |   |
| 2  | 35 | 7 |
| 3  | 27 | 7 |
| 4  | 52 | 6 |
| 5  | 52 | 7 |
| 6  | 44 | 7 |
| 7  | 45 | 7 |
| 8  | 39 | 6 |
| 9  | 45 | 7 |
| 10 | 44 | 6 |
| 11 | 48 | 6 |
| 12 | 44 | 6 |
| 13 | 36 | 7 |
| 14 | 36 | 6 |
| 15 | 46 | 6 |
| 16 | 29 | 7 |
| 17 | 48 | 7 |
| 18 | 56 | 7 |
| 19 | 45 | 6 |
| 20 | 52 | 7 |
| 21 | 40 | 7 |
| 22 | 48 | 7 |
| 23 | 50 | 7 |
| 24 | 43 | 4 |
| 25 | 35 | 6 |
| 26 | 42 | 7 |
| 27 | 41 | 7 |
| 28 | 50 | 7 |
| 29 | 53 | 7 |
| 30 | 53 | 7 |
| 31 | 61 | 7 |
| 32 | 23 | 7 |
| 33 | 46 | 7 |
| 34 | 41 | 7 |
| 35 | 43 | 7 |
| 36 | 37 | 7 |
| 37 | 35 | 7 |
| 38 | 49 | 7 |
| 39 | 48 | 7 |
| 40 | 54 | 7 |
| 41 | 30 | 7 |
| 42 | 30 | 7 |
| 43 | 39 | 6 |
| 44 | 40 | 6 |
| 45 | 41 | 6 |
| 46 | 41 | 6 |
| 47 | 45 | 6 |
| 48 | 43 | 6 |
| 49 |    |   |
| 50 |    |   |
| 51 |    |   |
| 52 |    |   |
| 53 |    |   |
| 54 |    |   |
| 55 |    |   |
| 56 |    |   |
| 57 |    |   |
| 58 |    |   |
| 59 |    |   |
| 60 |    |   |

**AL CASES - PARTICIPANTS' ANSWERS (POST-WORKSHOP)**

|    | 2 | 3 | 4 | 5 | 6 | 7 | 8 | 9 | 10 |
|----|---|---|---|---|---|---|---|---|----|
| 1  |   |   |   |   |   |   |   |   |    |
| 2  |   |   |   |   |   |   |   |   |    |
| 3  |   |   |   |   |   |   |   |   |    |
| 4  |   |   |   |   |   |   |   |   |    |
| 5  |   |   |   |   |   |   |   |   |    |
| 6  |   |   |   |   |   |   |   |   |    |
| 7  |   |   |   |   |   |   |   |   |    |
| 8  |   |   |   |   |   |   |   |   |    |
| 9  |   |   |   |   |   |   |   |   |    |
| 10 |   |   |   |   |   |   |   |   |    |
| 11 |   |   |   |   |   |   |   |   |    |
| 12 |   |   |   |   |   |   |   |   |    |
| 13 | 6 | 7 | 7 | 7 | 6 | 6 | 7 | 7 | 7  |
| 14 | 6 | 7 | 7 | 7 | 7 | 7 | 7 | 7 | 7  |
| 15 | 7 | 7 | 7 | 7 | 7 | 4 | 7 | 7 | 7  |
| 16 | 7 | 7 | 6 | 7 | 6 | 4 | 5 | 7 | 5  |
| 17 | 7 | 7 | 7 | 7 | 7 | 7 | 7 | 7 | 7  |
| 18 | 7 | 7 | 7 | 7 | 7 | 7 | 7 | 7 | 7  |
| 19 | 7 | 7 | 7 | 7 | 7 | 7 | 7 | 7 | 7  |
| 20 | 7 | 7 | 6 | 7 | 6 | 4 | 6 | 7 | 7  |
| 21 | 7 | 6 | 1 | 7 | 5 | 1 | 6 | 7 | 6  |
| 22 | 7 | 6 | 7 | 7 | 7 | 4 | 6 | 6 | 7  |
| 23 | 7 | 7 | 6 | 6 | 7 | 6 | 6 | 6 | 6  |
| 24 | 7 | 7 | 7 | 7 | 7 | 6 | 6 | 7 | 7  |
| 25 | 7 | 7 | 7 | 7 | 7 | 4 | 6 | 7 | 7  |
| 26 | 7 | 7 | 7 | 6 | 6 | 6 | 6 | 7 | 7  |
| 27 | 7 | 7 | 7 | 7 | 7 | 7 | 7 | 7 | 7  |
| 28 | 7 | 6 | 5 | 6 | 4 | 4 | 5 | 5 | 7  |
| 29 | 7 | 7 | 7 | 7 | 7 | 7 | 7 | 7 | 7  |
| 30 | 7 | 7 | 7 | 7 | 7 | 7 | 7 | 7 | 7  |
| 31 | 7 | 7 | 7 | 7 | 7 | 7 | 7 | 7 | 7  |
| 32 | 7 | 7 | 7 | 7 | 7 | 7 | 7 | 7 | 7  |
| 33 | 6 | 4 | 6 | 7 | 7 | 6 | 7 | 7 | 7  |
| 34 | 6 | 4 | 7 | 7 | 6 | 7 | 7 | 7 | 7  |
| 35 | 5 | 6 | 6 | 6 | 6 | 4 | 5 | 6 | 6  |
| 36 | 7 | 7 | 6 | 7 | 7 | 6 | 5 | 7 | 7  |
| 37 | 7 | 6 | 7 | 7 | 7 | 6 | 7 | 7 | 7  |
| 38 | 6 | 7 | 5 | 7 | 7 | 7 | 7 | 7 | 7  |
| 39 | 5 | 5 | 7 | 5 | 6 | 5 | 6 | 7 | 7  |
| 40 | 7 | 7 | 7 | 7 | 7 | 7 | 6 | 7 | 6  |
| 41 | 7 | 7 | 7 | 7 | 7 | 7 | 7 | 7 | 7  |
| 42 | 7 | 7 | 7 | 7 | 7 | 4 | 1 | 7 | 7  |
| 43 | 7 | 7 | 7 | 7 | 7 | 7 | 7 | 7 | 7  |
| 44 | 7 | 7 | 7 | 7 | 7 | 7 | 7 | 7 | 7  |
| 45 | 7 | 7 | 6 | 7 | 7 | 6 | 7 | 7 | 7  |
| 46 | 6 | 7 | 6 | 7 | 7 | 4 | 6 | 7 | 7  |
| 47 | 7 | 7 | 7 | 6 | 7 | 1 | 6 | 7 | 6  |
| 48 | 7 | 7 | 7 | 7 | 7 | 6 | 6 | 7 | 7  |
| 49 | 6 | 6 | 6 | 6 | 6 | 6 | 6 | 7 | 5  |
| 50 | 7 | 7 | 7 | 7 | 7 | 7 | 6 | 7 | 7  |
| 51 | 6 | 6 | 6 | 6 | 6 | 6 | 6 | 7 | 5  |
| 52 | 7 | 7 | 7 | 7 | 7 | 7 | 6 | 7 | 7  |
| 53 | 6 | 6 | 6 | 6 | 7 | 4 | 6 | 7 | 6  |
| 54 | 6 | 7 | 7 | 7 | 6 | 7 | 7 | 7 | 7  |
| 55 | 7 | 4 | 4 | 7 | 7 | 4 | 7 | 7 | 4  |
| 56 | 7 | 7 | 7 | 7 | 7 | 7 | 7 | 7 | 7  |
| 57 | 7 | 7 | 7 | 7 | 7 | 7 | 7 | 7 | 7  |
| 58 | 6 | 7 | 7 | 7 | 7 | 7 | 7 | 7 | 7  |
| 59 | 7 | 7 | 7 | 6 | 7 | 7 | 7 | 7 | 7  |
| 60 | 6 | 6 | 5 | 6 | 4 | 4 | 5 | 5 | 7  |

|    |   |   |   |   |   |   |   |   |   |
|----|---|---|---|---|---|---|---|---|---|
| 1  |   |   |   |   |   |   |   |   |   |
| 2  | 7 | 7 | 6 | 7 | 7 | 7 | 6 | 6 | 7 |
| 3  | 7 | 7 | 6 | 7 | 6 | 4 | 3 | 7 | 7 |
| 4  | 6 | 6 | 7 | 7 | 7 | 7 | 7 | 7 | 6 |
| 5  | 7 | 7 | 7 | 7 | 7 | 4 | 6 | 7 | 7 |
| 6  | 7 | 7 | 7 | 7 | 6 | 6 | 6 | 7 | 6 |
| 7  |   |   |   |   |   |   |   |   |   |
| 8  | 4 | 6 | 6 | 3 | 6 | 5 | 5 | 7 | 6 |
| 9  | 6 | 5 | 7 | 6 | 5 | 6 | 7 | 7 | 6 |
| 10 | 5 | 7 | 7 | 7 | 7 | 7 | 7 | 7 | 7 |
| 11 | 7 | 5 | 7 | 7 | 7 | 1 | 5 | 7 | 7 |
| 12 |   |   |   |   |   |   |   |   |   |
| 13 | 5 | 7 | 7 | 7 | 6 | 4 | 7 | 7 | 7 |
| 14 | 7 | 5 | 7 | 7 | 7 | 1 | 5 | 7 | 7 |
| 15 | 7 | 6 | 7 | 7 | 7 | 6 | 6 | 6 | 7 |
| 16 | 6 | 7 | 7 | 7 | 6 | 6 | 5 | 6 | 6 |
| 17 | 6 | 7 | 7 | 7 | 7 | 4 | 7 | 7 | 7 |
| 18 |   |   |   |   |   |   |   |   |   |
| 19 | 7 | 7 | 7 | 7 | 7 | 6 | 7 | 7 | 7 |
| 20 | 7 | 7 | 7 | 7 | 7 | 7 | 7 | 7 | 7 |
| 21 | 7 | 7 | 7 | 7 | 7 | 7 | 7 | 7 | 7 |
| 22 | 4 | 7 | 7 | 7 | 6 | 4 | 7 | 7 | 7 |
| 23 |   |   |   |   |   |   |   |   |   |
| 24 | 7 | 6 | 7 | 6 | 7 | 5 | 6 | 7 | 7 |
| 25 | 7 | 7 | 7 | 7 | 7 | 7 | 5 | 7 | 7 |
| 26 | 7 | 7 | 7 | 7 | 7 | 4 | 7 | 7 | 7 |
| 27 | 7 | 6 | 6 | 6 | 6 | 6 | 6 | 6 | 6 |
| 28 | 7 | 7 | 1 | 7 | 5 | 2 | 2 | 7 | 7 |
| 29 | 7 | 7 | 7 | 7 | 7 | 3 | 7 | 7 | 7 |
| 30 |   |   |   |   |   |   |   |   |   |
| 31 | 7 | 7 | 7 | 5 | 7 | 3 | 3 | 3 | 6 |
| 32 | 5 | 7 | 7 | 7 | 5 | 4 | 6 | 7 | 7 |
| 33 | 7 | 7 | 7 | 7 | 7 | 6 | 5 | 7 | 6 |
| 34 | 7 | 7 | 7 | 7 | 7 | 7 | 7 | 7 | 7 |
| 35 |   |   |   |   |   |   |   |   |   |
| 36 | 6 | 7 | 7 | 7 | 7 | 7 | 7 | 7 | 7 |
| 37 | 7 | 7 | 7 | 7 | 7 | 7 | 7 | 7 | 7 |
| 38 | 7 | 7 | 7 | 7 | 7 | 7 | 7 | 7 | 7 |
| 39 | 7 | 4 | 7 | 7 | 6 | 5 | 7 | 7 | 7 |
| 40 | 5 | 7 | 7 | 6 | 6 | 4 | 6 | 7 | 6 |
| 41 | 7 | 7 | 7 | 7 | 7 | 6 | 6 | 7 | 7 |
| 42 |   |   |   |   |   |   |   |   |   |
| 43 | 7 | 7 | 7 | 7 | 7 | 7 | 7 | 7 | 7 |
| 44 | 7 | 7 | 7 | 7 | 7 | 7 | 7 | 7 | 7 |
| 45 | 7 | 7 | 7 | 7 | 7 | 7 | 5 | 7 | 7 |
| 46 | 7 | 7 | 7 | 7 | 7 | 7 | 7 | 7 | 7 |
| 47 | 7 | 7 | 7 | 7 | 7 | 4 | 7 | 7 | 7 |
| 48 |   |   |   |   |   |   |   |   |   |
| 49 | 4 | 7 | 7 | 5 | 7 | 1 | 5 | 7 | 5 |
| 50 | 6 | 7 | 7 | 7 | 7 | 6 | 6 | 7 | 7 |
| 51 | 4 | 6 | 7 | 7 | 7 | 4 | 7 | 7 | 7 |
| 52 | 4 | 7 | 6 | 7 | 5 | 7 | 7 | 7 | 7 |
| 53 |   |   |   |   |   |   |   |   |   |
| 54 | 6 | 7 | 5 | 7 | 6 | 7 | 7 | 7 | 6 |
| 55 | 6 | 7 | 7 | 7 | 7 | 4 | 7 | 7 | 7 |
| 56 | 6 | 7 | 7 | 7 | 7 | 4 | 7 | 7 | 6 |
| 57 | 7 | 5 | 7 | 7 | 7 | 1 | 5 | 7 | 7 |
| 58 |   |   |   |   |   |   |   |   |   |
| 59 |   |   |   |   |   |   |   |   |   |
| 60 |   |   |   |   |   |   |   |   |   |

1  
2  
3  
4  
5  
6  
7  
8  
9  
10  
11  
12  
13  
14  
15  
16  
17  
18  
19  
20  
21  
22  
23  
24  
25  
26  
27  
28  
29  
30  
31  
32  
33  
34  
35  
36  
37  
38  
39  
40  
41  
42  
43  
44  
45  
46  
47  
48  
49  
50  
51  
52  
53  
54  
55  
56  
57  
58  
59  
60

---

| 11 | 12 | 13 | 14 | 15 | 16 | 17 | 18 | 19 |
|----|----|----|----|----|----|----|----|----|
| 7  | 7  | 6  | 1  | 7  | 4  | 7  | 7  | 1  |
| 7  | 7  | 7  | 1  | 7  | 5  | 6  | 7  | 5  |
| 7  | 7  | 7  | 1  | 7  | 4  | 7  | 7  | 7  |
| 6  | 5  | 6  | 1  | 7  | 3  | 5  | 7  | 2  |
| 7  | 7  | 7  | 4  | 7  | 4  | 4  | 7  | 7  |
| 7  | 7  | 7  | 1  | 7  | 5  | 5  | 7  | 7  |
| 7  | 7  | 6  | 5  | 7  | 6  | 6  | 7  | 5  |
| 6  | 6  | 6  | 1  | 7  | 7  | 2  | 7  | 4  |
| 7  | 7  | 4  | 6  | 7  | 6  | 6  | 7  | 4  |
| 7  | 7  | 7  | 6  | 6  | 7  | 5  | 6  | 6  |
| 7  | 7  | 1  | 1  | 7  | 7  | 6  | 7  | 5  |
| 7  | 7  | 7  | 4  | 7  | 6  | 7  | 6  | 4  |
| 7  | 7  | 4  | 2  | 7  | 6  | 6  | 7  | 4  |
| 6  | 6  | 4  | 1  | 7  | 3  | 6  | 6  | 3  |
| 7  | 7  | 2  | 3  | 7  | 4  | 4  | 7  | 4  |
| 6  | 6  | 7  | 1  | 7  | 4  | 5  | 7  | 2  |
| 7  | 7  | 6  | 1  | 7  | 7  | 3  | 7  | 3  |
| 7  | 6  | 6  | 1  | 7  | 1  | 6  | 7  | 6  |
| 7  | 7  | 7  | 1  | 7  | 1  | 2  | 7  | 7  |
| 7  | 7  | 3  | 2  | 3  | 7  | 3  | 7  | 5  |
| 7  | 7  | 7  | 1  | 7  | 5  | 5  | 7  | 6  |
| 7  | 7  | 7  | 1  | 7  | 3  | 4  | 7  | 1  |
| 7  | 7  | 6  | 1  | 6  | 3  | 7  | 7  | 5  |
| 7  | 7  | 4  | 1  | 7  | 3  | 7  | 7  | 2  |
| 6  | 7  | 4  | 5  | 5  | 5  | 7  | 6  | 1  |
| 7  | 6  | 4  | 3  | 7  | 5  | 6  | 7  | 3  |
| 6  | 6  | 1  | 1  | 7  | 7  | 5  | 6  | 5  |
| 7  | 7  | 7  | 3  | 7  | 7  | 7  | 7  | 3  |
| 7  | 7  | 4  | 4  | 7  | 7  | 6  | 7  | 1  |
| 6  | 6  | 6  | 3  | 7  | 7  | 5  | 7  | 6  |
| 7  | 4  | 1  | 1  | 6  | 7  | 2  | 7  | 1  |
| 7  | 6  | 5  | 3  | 7  | 7  | 2  | 7  | 1  |
| 7  | 6  | 2  | 4  | 7  | 4  | 4  | 6  | 4  |
| 7  | 5  | 1  | 1  | 7  | 4  | 6  | 7  | 4  |
| 7  | 7  | 6  | 2  | 7  | 6  | 5  | 7  | 4  |
| 7  | 7  | 1  | 1  | 7  | 1  | 5  | 7  | 4  |
| 7  | 6  | 5  | 6  | 7  | 4  | 5  | 7  | 4  |
| 7  | 7  | 7  | 1  | 7  | 1  | 4  | 7  | 1  |
| 7  | 7  | 7  | 1  | 7  | 7  | 2  | 7  | 7  |
| 7  | 7  | 7  | 4  | 7  | 4  | 7  | 7  | 2  |
| 7  | 7  | 2  | 3  | 7  | 4  | 4  | 7  | 5  |

|    |   |   |   |   |   |   |   |   |   |
|----|---|---|---|---|---|---|---|---|---|
| 1  |   |   |   |   |   |   |   |   |   |
| 2  | 7 | 7 | 2 | 3 | 7 | 7 | 7 | 7 | 3 |
| 3  | 7 | 5 | 4 | 4 | 7 | 6 | 4 | 7 | 3 |
| 4  | 7 | 7 | 7 | 1 | 7 | 7 | 5 | 6 | 2 |
| 5  | 7 | 6 | 5 | 1 | 7 | 1 | 6 | 6 | 2 |
| 6  | 7 | 7 | 7 | 5 | 4 | 4 | 4 | 7 | 3 |
| 7  | 7 | 7 | 4 | 2 | 7 | 1 | 5 | 7 | 1 |
| 8  | 7 | 6 | 4 | 2 | 6 | 2 | 3 | 7 | 2 |
| 9  | 7 | 7 | 6 | 3 | 7 | 2 | 3 | 7 | 1 |
| 10 | 7 | 6 | 2 | 1 | 7 | 2 | 1 | 7 | 1 |
| 11 | 7 | 7 | 6 | 3 | 7 | 4 | 3 | 7 | 1 |
| 12 | 7 | 6 | 2 | 1 | 7 | 2 | 1 | 7 | 1 |
| 13 | 7 | 5 | 6 | 1 | 7 | 1 | 7 | 7 | 2 |
| 14 | 7 | 6 | 6 | 1 | 6 | 6 | 5 | 5 | 4 |
| 15 | 7 | 7 | 1 | 1 | 7 | 7 | 7 | 7 | 5 |
| 16 | 7 | 7 | 7 | 5 | 7 | 7 | 5 | 7 | 5 |
| 17 | 7 | 7 | 7 | 4 | 7 | 7 | 4 | 7 | 5 |
| 18 | 7 | 7 | 7 | 1 | 7 | 1 | 4 | 7 | 4 |
| 19 | 7 | 6 | 7 | 5 | 7 | 7 | 5 | 7 | 5 |
| 20 | 7 | 7 | 2 | 1 | 7 | 1 | 2 | 6 | 2 |
| 21 | 6 | 5 | 4 | 3 | 7 | 4 | 6 | 7 | 4 |
| 22 | 7 | 7 | 1 | 3 | 7 | 4 | 4 | 7 | 4 |
| 23 | 7 | 7 | 2 | 1 | 7 | 1 | 7 | 7 | 2 |
| 24 | 6 | 3 | 7 | 2 | 7 | 2 | 6 | 6 | 4 |
| 25 | 6 | 7 | 5 | 3 | 7 | 2 | 5 | 7 | 2 |
| 26 | 7 | 7 | 6 | 2 | 7 | 2 | 5 | 7 | 2 |
| 27 | 7 | 7 | 7 | 1 | 7 | 4 | 6 | 7 | 1 |
| 28 | 7 | 7 | 6 | 1 | 7 | 2 | 5 | 7 | 1 |
| 29 | 7 | 7 | 7 | 1 | 7 | 4 | 7 | 7 | 7 |
| 30 | 7 | 7 | 7 | 1 | 7 | 4 | 6 | 7 | 4 |
| 31 | 7 | 6 | 5 | 3 | 6 | 4 | 6 | 6 | 1 |
| 32 | 6 | 6 | 4 | 1 | 7 | 2 | 5 | 6 | 2 |
| 33 | 7 | 6 | 5 | 1 | 7 | 5 | 6 | 6 | 1 |
| 34 | 7 | 7 | 6 | 2 | 7 | 7 | 6 | 6 | 2 |
| 35 | 7 | 7 | 4 | 1 | 7 | 7 | 7 | 7 | 1 |
| 36 | 7 | 7 | 2 | 1 | 7 | 1 | 3 | 7 | 2 |
| 37 | 7 | 7 | 4 | 1 | 7 | 7 | 7 | 7 | 1 |
| 38 | 7 | 6 | 5 | 1 | 7 | 1 | 2 | 7 | 2 |
| 39 | 7 | 5 | 1 | 1 | 7 | 7 | 4 | 7 | 1 |
| 40 | 7 | 7 | 4 | 3 | 7 | 7 | 6 | 7 | 3 |
| 41 | 7 | 4 | 1 | 1 | 7 | 7 | 6 | 7 | 4 |
| 42 | 7 | 7 | 2 | 2 | 7 | 4 | 4 | 7 | 2 |
| 43 | 7 | 6 | 3 | 2 | 7 | 2 | 4 | 7 | 2 |
| 44 | 7 | 7 | 7 | 5 | 7 | 1 | 5 | 7 | 4 |
| 45 | 7 | 7 | 7 | 5 | 7 | 1 | 6 | 7 | 4 |
| 46 | 7 | 6 | 2 | 1 | 7 | 2 | 1 | 7 | 1 |
| 47 | 7 | 7 | 4 | 1 | 7 | 7 | 7 | 7 | 1 |
| 48 | 7 | 6 | 5 | 1 | 7 | 1 | 2 | 7 | 2 |
| 49 | 7 | 5 | 1 | 1 | 7 | 7 | 4 | 7 | 1 |
| 50 | 7 | 7 | 4 | 3 | 7 | 7 | 6 | 7 | 3 |
| 51 | 7 | 4 | 1 | 1 | 7 | 7 | 6 | 7 | 4 |
| 52 | 7 | 7 | 2 | 2 | 7 | 4 | 4 | 7 | 2 |
| 53 | 7 | 6 | 3 | 2 | 7 | 2 | 4 | 7 | 2 |
| 54 | 7 | 7 | 7 | 5 | 7 | 1 | 5 | 7 | 4 |
| 55 | 7 | 7 | 7 | 5 | 7 | 1 | 6 | 7 | 4 |
| 56 | 7 | 6 | 2 | 1 | 7 | 2 | 1 | 7 | 1 |
| 57 | 7 | 7 | 2 | 1 | 7 | 2 | 1 | 7 | 1 |
| 58 |   |   |   |   |   |   |   |   |   |
| 59 |   |   |   |   |   |   |   |   |   |
| 60 |   |   |   |   |   |   |   |   |   |

1  
2  
3  
4  
5  
6  
7  
8  
9  
10  
11  
12  
13  
14  
15  
16  
17  
18  
19  
20  
21  
22  
23  
24  
25  
26  
27  
28  
29  
30  
31  
32  
33  
34  
35  
36  
37  
38  
39  
40  
41  
42  
43  
44  
45  
46  
47  
48  
49  
50  
51  
52  
53  
54  
55  
56  
57  
58  
59  
60

---

| 20 | 21 | 22 | 23 | 24 | 25 | 26 | 27 | 28 |
|----|----|----|----|----|----|----|----|----|
| 5  | 7  | 7  | 3  | 1  | 7  | 7  | 3  | 2  |
| 5  | 7  | 7  | 1  | 1  | 7  | 7  | 1  | 6  |
| 1  | 4  | 4  | 7  | 4  | 1  | 7  | 7  | 1  |
| 5  | 6  | 7  | 4  | 3  | 7  | 7  | 5  | 5  |
| 7  | 1  | 7  | 1  | 3  | 7  | 7  | 1  | 7  |
| 7  | 6  | 6  | 4  | 3  | 6  | 6  | 3  | 3  |
| 4  | 7  | 6  | 3  | 7  | 7  | 7  | 1  | 3  |
| 2  | 1  | 7  | 3  | 1  | 7  | 7  | 1  | 1  |
| 3  | 7  | 7  | 2  | 1  | 7  | 7  | 1  | 2  |
| 7  | 5  | 6  | 4  | 5  | 6  | 5  | 7  | 6  |
| 5  | 5  | 7  | 1  | 1  | 7  | 7  | 1  | 1  |
| 5  | 5  | 6  | 4  | 5  | 6  | 5  | 7  | 6  |
| 4  | 2  | 5  | 2  | 2  | 7  | 7  | 2  | 3  |
| 5  | 5  | 7  | 4  | 2  | 6  | 5  | 1  | 2  |
| 2  | 4  | 7  | 1  | 1  | 7  | 7  | 1  | 5  |
| 4  | 5  | 7  | 1  | 2  | 7  | 7  | 3  | 5  |
| 7  | 6  | 7  | 1  | 7  | 7  | 7  | 1  | 6  |
| 4  | 3  | 7  | 3  | 3  | 6  | 7  | 2  | 6  |
| 4  | 1  | 7  | 1  | 2  | 6  | 7  | 2  | 1  |
| 4  | 5  | 4  | 2  | 6  | 6  | 6  | 5  | 3  |
| 6  | 2  | 7  | 5  | 1  | 7  | 7  | 5  | 6  |
| 1  | 5  | 7  | 4  | 1  | 7  | 7  | 1  | 1  |
| 4  | 5  | 7  | 5  | 1  | 5  | 7  | 1  | 1  |
| 5  | 5  | 6  | 4  | 1  | 5  | 6  | 6  | 2  |
| 5  | 5  | 5  | 3  | 1  | 7  | 7  | 3  | 1  |
| 5  | 6  | 6  | 3  | 1  | 7  | 7  | 3  | 1  |
| 6  | 6  | 6  | 1  | 1  | 7  | 7  | 4  | 2  |
| 4  | 1  | 7  | 4  | 1  | 7  | 6  | 4  | 1  |
| 4  | 6  | 7  | 1  | 2  | 7  | 7  | 3  | 3  |
| 6  | 5  | 6  | 3  | 2  | 7  | 7  | 1  | 2  |
| 1  | 5  | 6  | 1  | 1  | 7  | 7  | 1  | 1  |
| 4  | 5  | 7  | 2  | 1  | 7  | 7  | 1  | 2  |
| 6  | 4  | 6  | 3  | 5  | 5  | 4  | 1  | 2  |
| 4  | 2  | 7  | 4  | 1  | 7  | 7  | 1  | 1  |
| 5  | 5  | 6  | 4  | 4  | 7  | 6  | 3  | 5  |
| 4  | 5  | 7  | 4  | 4  | 7  | 5  | 4  | 5  |
| 4  | 5  | 7  | 4  | 4  | 7  | 5  | 4  | 4  |
| 4  | 4  | 7  | 4  | 1  | 7  | 7  | 1  | 1  |
| 2  | 1  | 7  | 1  | 1  | 7  | 7  | 1  | 1  |
| 5  | 4  | 4  | 4  | 1  | 7  | 7  | 1  | 4  |
| 1  | 5  | 7  | 2  | 1  | 7  | 7  | 1  | 5  |

|    |   |   |   |   |   |   |   |   |   |
|----|---|---|---|---|---|---|---|---|---|
| 1  |   |   |   |   |   |   |   |   |   |
| 2  | 4 | 4 | 4 | 4 | 1 | 6 | 4 | 3 | 1 |
| 3  | 6 | 4 | 7 | 3 | 3 | 7 | 7 | 3 | 3 |
| 4  | 7 | 6 | 7 | 1 | 1 | 7 | 7 | 1 | 1 |
| 5  | 2 | 5 | 6 | 2 | 1 | 7 | 7 | 1 | 1 |
| 6  | 5 | 6 | 5 | 3 | 1 | 7 | 7 | 1 | 6 |
| 7  | 2 | 4 | 7 | 1 | 1 | 7 | 6 | 4 | 6 |
| 8  | 4 | 5 | 7 | 3 | 1 | 7 | 7 | 5 | 3 |
| 9  | 1 | 2 | 7 | 4 | 3 | 7 | 7 | 3 | 6 |
| 10 | 2 | 4 | 7 | 1 | 1 | 2 | 3 | 1 | 1 |
| 11 | 1 | 2 | 7 | 4 | 3 | 7 | 7 | 3 | 6 |
| 12 | 2 | 4 | 7 | 1 | 1 | 2 | 3 | 1 | 1 |
| 13 | 5 | 1 | 7 | 5 | 1 | 7 | 7 | 2 | 1 |
| 14 | 5 | 5 | 5 | 4 | 3 | 7 | 7 | 5 | 5 |
| 15 | 1 | 7 | 7 | 4 | 1 | 7 | 7 | 1 | 1 |
| 16 | 5 | 5 | 5 | 6 | 3 | 7 | 7 | 4 | 3 |
| 17 | 7 | 6 | 5 | 4 | 6 | 7 | 7 | 6 | 6 |
| 18 | 7 | 7 | 7 | 4 | 1 | 7 | 7 | 1 | 4 |
| 19 | 6 | 2 | 5 | 1 | 2 | 7 | 7 | 5 | 6 |
| 20 | 6 | 6 | 4 | 1 | 3 | 6 | 7 | 1 | 6 |
| 21 | 7 | 1 | 7 | 1 | 1 | 7 | 6 | 5 | 2 |
| 22 | 6 | 1 | 7 | 1 | 1 | 6 | 6 | 1 | 5 |
| 23 | 5 | 5 | 7 | 4 | 1 | 7 | 7 | 2 | 4 |
| 24 | 2 | 3 | 7 | 4 | 1 | 6 | 6 | 1 | 1 |
| 25 | 7 | 1 | 7 | 1 | 1 | 7 | 7 | 2 | 2 |
| 26 | 4 | 5 | 6 | 3 | 1 | 7 | 7 | 2 | 1 |
| 27 | 2 | 6 | 6 | 1 | 1 | 7 | 7 | 1 | 2 |
| 28 | 2 | 7 | 7 | 2 | 1 | 7 | 7 | 1 | 3 |
| 29 | 6 | 3 | 7 | 1 | 1 | 7 | 7 | 6 | 7 |
| 30 | 1 | 4 | 7 | 1 | 1 | 7 | 7 | 1 | 1 |
| 31 | 7 | 5 | 7 | 3 | 1 | 7 | 7 | 1 | 1 |
| 32 | 7 | 5 | 7 | 3 | 1 | 7 | 7 | 4 | 1 |
| 33 | 1 | 3 | 6 | 1 | 1 | 7 | 6 | 2 | 2 |
| 34 | 4 | 6 | 6 | 3 | 3 | 2 | 2 | 2 | 2 |
| 35 | 1 | 5 | 5 | 1 | 1 | 7 | 7 | 1 | 1 |
| 36 | 5 | 5 | 7 | 1 | 4 | 7 | 7 | 2 | 6 |
| 37 | 1 | 6 | 7 | 1 | 1 | 6 | 6 | 1 | 1 |
| 38 | 4 | 6 | 7 | 2 | 6 | 7 | 7 | 5 | 2 |
| 39 | 1 | 6 | 7 | 1 | 1 | 6 | 6 | 1 | 1 |
| 40 | 5 | 5 | 7 | 2 | 1 | 7 | 7 | 1 | 3 |
| 41 | 1 | 5 | 5 | 1 | 1 | 7 | 7 | 1 | 1 |
| 42 | 3 | 5 | 7 | 1 | 1 | 7 | 7 | 1 | 1 |
| 43 | 5 | 3 | 7 | 2 | 1 | 7 | 7 | 2 | 2 |
| 44 | 1 | 2 | 5 | 1 | 1 | 7 | 7 | 1 | 4 |
| 45 | 1 | 6 | 6 | 1 | 1 | 5 | 5 | 1 | 5 |
| 46 | 7 | 5 | 6 | 1 | 1 | 6 | 7 | 4 | 1 |
| 47 | 7 | 5 | 6 | 3 | 1 | 7 | 7 | 4 | 1 |
| 48 | 2 | 4 | 7 | 1 | 1 | 5 | 7 | 1 | 1 |
| 49 |   |   |   |   |   |   |   |   |   |
| 50 |   |   |   |   |   |   |   |   |   |
| 51 |   |   |   |   |   |   |   |   |   |
| 52 |   |   |   |   |   |   |   |   |   |
| 53 |   |   |   |   |   |   |   |   |   |
| 54 |   |   |   |   |   |   |   |   |   |
| 55 |   |   |   |   |   |   |   |   |   |
| 56 |   |   |   |   |   |   |   |   |   |
| 57 |   |   |   |   |   |   |   |   |   |
| 58 |   |   |   |   |   |   |   |   |   |
| 59 |   |   |   |   |   |   |   |   |   |
| 60 |   |   |   |   |   |   |   |   |   |

1  
2  
3  
4  
5  
6  
7  
8  
9  
10  
11  
12  
13  
14  
15  
16  
17  
18  
19  
20  
21  
22  
23  
24  
25  
26  
27  
28  
29  
30  
31  
32  
33  
34  
35  
36  
37  
38  
39  
40  
41  
42  
43  
44  
45  
46  
47  
48  
49  
50  
51  
52  
53  
54  
55  
56  
57  
58  
59  
60

| 29 | 30 | 31 | 32 | 33 | 34 | 35 | 36 | 37 |
|----|----|----|----|----|----|----|----|----|
| 2  | 7  | 6  | 7  | 1  | 4  | 2  | 3  | 7  |
| 1  | 1  | 5  | 7  | 1  | 1  | 7  | 4  | 7  |
| 1  | 1  | 4  | 7  | 7  | 1  | 4  | 1  | 7  |
| 4  | 3  | 4  | 7  | 1  | 1  | 7  | 6  | 6  |
| 1  | 7  | 7  | 4  | 1  | 7  | 6  | 6  | 7  |
| 4  | 7  | 5  | 7  | 1  | 1  | 5  | 5  | 7  |
| 1  | 6  | 1  | 5  | 2  | 7  | 7  | 6  | 7  |
| 1  | 4  | 1  | 6  | 1  | 1  | 6  | 6  | 7  |
| 1  | 7  | 4  | 7  | 1  | 7  | 6  | 6  | 7  |
| 6  | 7  | 1  | 1  | 1  | 1  | 6  | 5  | 6  |
| 1  | 4  | 4  | 6  | 2  | 7  | 7  | 6  | 7  |
| 6  | 7  | 6  | 7  | 1  | 1  | 2  | 1  | 7  |
| 1  | 1  | 5  | 6  | 4  | 2  | 6  | 4  | 7  |
| 1  | 5  | 5  | 7  | 1  | 1  | 5  | 5  | 5  |
| 1  | 3  | 7  | 7  | 1  | 1  | 2  | 5  | 6  |
| 2  | 5  | 6  | 7  | 6  | 2  | 6  | 6  | 7  |
| 3  | 6  | 5  | 7  | 6  | 6  | 6  | 1  | 7  |
| 1  | 5  | 6  | 7  | 2  | 1  | 6  | 6  | 6  |
| 1  | 7  | 6  | 7  | 1  | 6  | 7  | 6  | 6  |
| 2  | 3  | 3  | 6  | 1  | 5  | 6  | 6  | 6  |
| 1  | 2  | 6  | 7  | 1  | 1  | 6  | 7  | 6  |
| 1  | 7  | 1  | 5  | 1  | 1  | 6  | 6  | 7  |
| 1  | 5  | 7  | 7  | 1  | 1  | 7  | 3  | 7  |
| 2  | 6  | 4  | 6  | 4  | 3  | 7  | 4  | 6  |
| 1  | 7  | 3  | 6  | 1  | 4  | 7  | 7  | 5  |
| 1  | 7  | 4  | 7  | 1  | 1  | 6  | 6  | 5  |
| 1  | 7  | 1  | 7  | 1  | 7  | 1  | 1  | 7  |
| 1  | 7  | 1  | 7  | 1  | 7  | 5  | 1  | 5  |
| 3  | 1  | 7  | 7  | 1  | 1  | 7  | 7  | 7  |
| 1  | 7  | 3  | 7  | 4  | 1  | 3  | 3  | 7  |
| 1  | 7  | 1  | 7  | 1  | 7  | 7  | 7  | 5  |
| 1  | 1  | 4  | 7  | 2  | 1  | 6  | 6  | 7  |
| 4  | 6  | 6  | 5  | 2  | 2  | 2  | 2  | 5  |
| 1  | 1  | 1  | 7  | 1  | 1  | 1  | 7  | 7  |
| 4  | 3  | 5  | 6  | 4  | 4  | 6  | 7  | 5  |
| 4  | 5  | 4  | 7  | 2  | 2  | 6  | 4  | 6  |
| 4  | 1  | 7  | 7  | 4  | 4  | 7  | 1  | 4  |
| 1  | 1  | 7  | 7  | 1  | 1  | 1  | 1  | 7  |
| 1  | 7  | 5  | 7  | 1  | 6  | 7  | 6  | 7  |
| 1  | 4  | 7  | 7  | 4  | 4  | 7  | 7  | 7  |
| 1  | 3  | 6  | 6  | 1  | 1  | 2  | 5  | 6  |



|    |   |   |   |   |   |   |   |   |   |
|----|---|---|---|---|---|---|---|---|---|
| 1  |   |   |   |   |   |   |   |   |   |
| 2  | 1 | 1 | 6 | 7 | 4 | 1 | 7 | 7 | 7 |
| 3  | 3 | 4 | 5 | 7 | 1 | 1 | 6 | 5 | 7 |
| 4  | 1 | 1 | 6 | 7 | 7 | 1 | 7 | 6 | 7 |
| 5  | 1 | 7 | 1 | 7 | 1 | 1 | 7 | 7 | 7 |
| 6  | 4 | 1 | 5 | 6 | 5 | 6 | 5 | 6 | 7 |
| 7  | 1 | 4 | 5 | 7 | 1 | 1 | 3 | 4 | 5 |
| 8  | 2 | 6 | 3 | 5 | 2 | 2 | 6 | 6 | 7 |
| 9  | 2 | 7 | 7 | 6 | 2 | 2 | 6 | 6 | 7 |
| 10 | 1 | 7 | 1 | 7 | 1 | 1 | 2 | 1 | 7 |
| 11 | 2 | 7 | 2 | 5 | 2 | 2 | 5 | 1 | 6 |
| 12 | 1 | 5 | 1 | 6 | 2 | 1 | 2 | 1 | 4 |
| 13 | 1 | 2 | 3 | 7 | 1 | 1 | 7 | 1 | 7 |
| 14 | 1 | 7 | 5 | 7 | 4 | 3 | 6 | 6 | 6 |
| 15 | 4 | 1 | 7 | 7 | 1 | 1 | 5 | 1 | 7 |
| 16 | 3 | 7 | 7 | 7 | 1 | 3 | 5 | 1 | 7 |
| 17 | 4 | 5 | 4 | 6 | 4 | 4 | 7 | 4 | 5 |
| 18 | 1 | 1 | 4 | 7 | 1 | 1 | 7 | 1 | 7 |
| 19 | 1 | 5 | 4 | 6 | 2 | 1 | 6 | 6 | 6 |
| 20 | 3 | 5 | 6 | 7 | 6 | 1 | 7 | 6 | 7 |
| 21 | 1 | 1 | 1 | 7 | 1 | 1 | 2 | 1 | 6 |
| 22 | 1 | 7 | 6 | 7 | 1 | 5 | 7 | 6 | 7 |
| 23 | 3 | 3 | 5 | 7 | 2 | 1 | 5 | 5 | 6 |
| 24 | 1 | 3 | 2 | 7 | 1 | 1 | 7 | 2 | 7 |
| 25 | 2 | 7 | 1 | 7 | 1 | 1 | 7 | 6 | 7 |
| 26 | 1 | 2 | 7 | 7 | 1 | 1 | 6 | 6 | 5 |
| 27 | 1 | 7 | 3 | 6 | 1 | 5 | 6 | 1 | 7 |
| 28 | 2 | 6 | 3 | 6 | 1 | 6 | 6 | 2 | 7 |
| 29 | 1 | 1 | 7 | 7 | 1 | 1 | 6 | 1 | 7 |
| 30 | 1 | 7 | 6 | 7 | 1 | 1 | 7 | 7 | 7 |
| 31 | 2 | 1 | 7 | 7 | 1 | 1 | 7 | 7 | 7 |
| 32 | 1 | 1 | 4 | 7 | 1 | 1 | 6 | 4 | 7 |
| 33 | 1 | 7 | 7 | 5 | 1 | 6 | 6 | 7 | 7 |
| 34 | 2 | 3 | 4 | 7 | 2 | 2 | 5 | 3 | 7 |
| 35 | 1 | 7 | 7 | 7 | 7 | 7 | 7 | 3 | 6 |
| 36 | 2 | 1 | 5 | 7 | 1 | 2 | 6 | 6 | 7 |
| 37 | 1 | 3 | 1 | 7 | 1 | 1 | 1 | 4 | 7 |
| 38 | 1 | 1 | 1 | 7 | 1 | 1 | 6 | 6 | 7 |
| 39 | 1 | 3 | 1 | 7 | 1 | 1 | 1 | 4 | 7 |
| 40 | 1 | 1 | 4 | 7 | 1 | 1 | 6 | 6 | 7 |
| 41 | 1 | 4 | 1 | 7 | 1 | 5 | 5 | 5 | 7 |
| 42 | 1 | 3 | 6 | 7 | 1 | 1 | 5 | 7 | 5 |
| 43 | 2 | 7 | 4 | 1 | 1 | 7 | 6 | 1 | 7 |
| 44 | 1 | 6 | 3 | 6 | 1 | 1 | 6 | 3 | 7 |
| 45 | 1 | 7 | 1 | 6 | 1 | 1 | 6 | 4 | 6 |
| 46 | 1 | 1 | 4 | 7 | 1 | 1 | 7 | 4 | 7 |
| 47 | 1 | 1 | 4 | 7 | 1 | 1 | 6 | 4 | 7 |
| 48 | 1 | 4 | 1 | 7 | 1 | 5 | 5 | 5 | 7 |
| 49 | 1 | 3 | 6 | 7 | 1 | 1 | 5 | 7 | 5 |
| 50 | 2 | 7 | 4 | 1 | 1 | 7 | 6 | 1 | 7 |
| 51 | 1 | 6 | 3 | 6 | 1 | 1 | 6 | 3 | 7 |
| 52 | 1 | 7 | 1 | 6 | 1 | 1 | 6 | 4 | 6 |
| 53 | 1 | 1 | 4 | 7 | 1 | 1 | 7 | 4 | 7 |
| 54 | 1 | 1 | 4 | 7 | 1 | 1 | 6 | 4 | 7 |
| 55 | 1 | 1 | 4 | 7 | 1 | 1 | 6 | 4 | 7 |
| 56 | 1 | 7 | 1 | 7 | 1 | 1 | 2 | 1 | 4 |
| 57 |   |   |   |   |   |   |   |   |   |
| 58 |   |   |   |   |   |   |   |   |   |
| 59 |   |   |   |   |   |   |   |   |   |
| 60 |   |   |   |   |   |   |   |   |   |



|    |   |   |   |   |   |   |   |   |  |
|----|---|---|---|---|---|---|---|---|--|
| 1  |   |   |   |   |   |   |   |   |  |
| 2  | 7 | 4 | 6 | 2 | 2 | 2 | 1 | 2 |  |
| 3  | 7 | 4 | 4 | 2 | 2 | 2 | 1 | 2 |  |
| 4  | 7 | 4 | 2 | 1 | 1 | 1 | 2 | 2 |  |
| 5  | 7 | 5 | 1 | 2 | 2 | 2 | 2 | 2 |  |
| 6  | 7 | 4 | 5 | 2 | 2 | 2 | 2 | 2 |  |
| 7  | 6 | 1 | 7 | 2 | 0 | 1 | 1 | 0 |  |
| 8  | 7 | 4 | 1 | 1 | 1 | 0 | 2 | 1 |  |
| 9  | 7 | 5 | 1 | 2 | 0 | 2 | 2 | 2 |  |
| 10 | 7 | 1 | 6 | 1 | 2 | 0 | 2 | 2 |  |
| 11 | 6 | 5 | 2 | 1 | 0 | 2 | 2 | 2 |  |
| 12 | 5 | 1 | 1 | 1 | 2 | 0 | 2 | 2 |  |
| 13 | 7 | 4 | 1 | 2 | 2 | 1 | 2 | 2 |  |
| 14 | 6 | 5 | 5 | 1 | 1 | 2 | 2 | 2 |  |
| 15 | 7 | 1 | 1 | 1 | 1 | 2 | 2 | 2 |  |
| 16 | 7 | 7 | 5 | 2 | 2 | 2 | 2 | 2 |  |
| 17 | 7 | 7 | 5 | 2 | 2 | 2 | 2 | 2 |  |
| 18 | 7 | 5 | 5 | 2 | 2 | 2 | 2 | 2 |  |
| 19 | 7 | 4 | 4 | 2 | 2 | 2 | 2 | 2 |  |
| 20 | 5 | 4 | 5 | 1 | 0 | 2 | 2 | 2 |  |
| 21 | 7 | 4 | 1 | 2 | 2 | 1 | 2 | 1 |  |
| 22 | 6 | 6 | 2 | 2 | 2 | 2 | 2 | 2 |  |
| 23 | 7 | 6 | 1 | 2 | 2 | 2 | 2 | 2 |  |
| 24 | 6 | 4 | 3 | 2 | 2 | 1 | 1 | 1 |  |
| 25 | 7 | 4 | 4 | 0 | 2 | 2 | 0 | 2 |  |
| 26 | 7 | 6 | 2 | 1 | 2 | 2 | 2 | 2 |  |
| 27 | 7 | 6 | 3 | 2 | 2 | 0 | 2 | 2 |  |
| 28 | 7 | 6 | 6 | 2 | 0 | 2 | 2 | 1 |  |
| 29 | 5 | 4 | 5 | 2 | 2 | 2 | 2 | 0 |  |
| 30 | 7 | 5 | 5 | 2 | 0 | 2 | 2 | 2 |  |
| 31 | 7 | 5 | 4 | 2 | 2 | 2 | 2 | 2 |  |
| 32 | 7 | 1 | 7 | 2 | 2 | 2 | 2 | 2 |  |
| 33 | 7 | 4 | 1 | 2 | 1 | 2 | 2 | 2 |  |
| 34 | 7 | 1 | 2 | 2 | 2 | 2 | 2 | 2 |  |
| 35 | 7 | 1 | 2 | 2 | 2 | 2 | 2 | 2 |  |
| 36 | 7 | 7 | 6 | 2 | 2 | 2 | 2 | 2 |  |
| 37 | 7 | 7 | 6 | 2 | 2 | 0 | 2 | 2 |  |
| 38 | 7 | 6 | 3 | 2 | 2 | 2 | 2 | 2 |  |
| 39 | 7 | 6 | 6 | 2 | 0 | 2 | 2 | 1 |  |
| 40 | 6 | 6 | 3 | 2 | 2 | 2 | 2 | 2 |  |
| 41 | 7 | 6 | 4 | 2 | 2 | 2 | 2 | 2 |  |
| 42 | 7 | 6 | 4 | 2 | 2 | 2 | 2 | 2 |  |
| 43 | 5 | 4 | 4 | 2 | 2 | 2 | 2 | 2 |  |
| 44 | 7 | 7 | 4 | 2 | 2 | 2 | 2 | 2 |  |
| 45 | 5 | 4 | 4 | 2 | 2 | 2 | 2 | 2 |  |
| 46 | 7 | 4 | 4 | 2 | 2 | 2 | 2 | 2 |  |
| 47 | 7 | 5 | 3 | 2 | 2 | 2 | 2 | 2 |  |
| 48 | 7 | 4 | 5 | 2 | 0 | 2 | 2 | 0 |  |
| 49 | 5 | 4 | 3 | 2 | 1 | 2 | 2 | 2 |  |
| 50 | 7 | 4 | 1 | 1 | 0 | 1 | 2 | 2 |  |
| 51 | 7 | 4 | 3 | 1 | 0 | 2 | 1 | 2 |  |
| 52 | 7 | 4 | 4 | 1 | 1 | 2 | 0 | 2 |  |
| 53 | 7 | 4 | 4 | 1 | 1 | 2 | 0 | 2 |  |
| 54 | 7 | 6 | 6 | 1 | 1 | 2 | 2 | 2 |  |
| 55 | 7 | 7 | 6 | 1 | 1 | 2 | 2 | 2 |  |
| 56 | 7 | 7 | 6 | 1 | 1 | 2 | 2 | 2 |  |
| 57 | 5 | 1 | 1 | 1 | 2 | 0 | 2 | 2 |  |
| 58 |   |   |   |   |   |   |   |   |  |
| 59 |   |   |   |   |   |   |   |   |  |
| 60 |   |   |   |   |   |   |   |   |  |

**ADJACENT ANSWER; 0 - ALL OTHER ANSWERS)**

|    | 6 | 7 | 8 | 9 | 10 | 11 | 12 | 13 | 14 |
|----|---|---|---|---|----|----|----|----|----|
| 1  | 1 | 1 | 2 | 2 | 2  | 2  | 1  | 2  | 2  |
| 2  | 2 | 2 | 2 | 2 | 2  | 2  | 1  | 1  | 2  |
| 3  | 2 | 0 | 2 | 2 | 2  | 2  | 1  | 1  | 2  |
| 4  | 1 | 0 | 0 | 2 | 0  | 1  | 1  | 2  | 2  |
| 5  | 2 | 2 | 2 | 2 | 2  | 2  | 1  | 1  | 0  |
| 6  | 2 | 2 | 2 | 2 | 2  | 2  | 1  | 1  | 2  |
| 7  | 1 | 0 | 1 | 2 | 2  | 2  | 1  | 2  | 0  |
| 8  | 0 | 0 | 1 | 2 | 1  | 1  | 2  | 2  | 2  |
| 9  | 2 | 0 | 1 | 1 | 2  | 2  | 1  | 0  | 0  |
| 10 | 2 | 1 | 1 | 1 | 1  | 2  | 1  | 1  | 0  |
| 11 | 2 | 1 | 1 | 2 | 2  | 2  | 1  | 0  | 2  |
| 12 | 2 | 0 | 1 | 2 | 2  | 2  | 1  | 1  | 0  |
| 13 | 1 | 1 | 1 | 2 | 2  | 2  | 1  | 0  | 1  |
| 14 | 2 | 2 | 2 | 2 | 2  | 1  | 2  | 0  | 2  |
| 15 | 0 | 0 | 0 | 0 | 2  | 2  | 1  | 0  | 0  |
| 16 | 2 | 2 | 2 | 2 | 2  | 1  | 2  | 1  | 2  |
| 17 | 2 | 2 | 2 | 2 | 2  | 2  | 1  | 2  | 2  |
| 18 | 2 | 1 | 2 | 2 | 2  | 2  | 2  | 2  | 2  |
| 19 | 1 | 2 | 2 | 2 | 2  | 2  | 1  | 1  | 2  |
| 20 | 1 | 0 | 0 | 1 | 1  | 2  | 1  | 0  | 1  |
| 21 | 2 | 1 | 0 | 2 | 2  | 2  | 1  | 1  | 2  |
| 22 | 2 | 1 | 2 | 2 | 2  | 2  | 1  | 1  | 2  |
| 23 | 2 | 2 | 2 | 2 | 2  | 2  | 1  | 2  | 2  |
| 24 | 1 | 0 | 1 | 2 | 2  | 2  | 1  | 0  | 2  |
| 25 | 2 | 2 | 2 | 2 | 2  | 2  | 2  | 0  | 0  |
| 26 | 2 | 0 | 0 | 2 | 2  | 1  | 2  | 0  | 2  |
| 27 | 2 | 2 | 2 | 2 | 2  | 2  | 1  | 1  | 0  |
| 28 | 2 | 1 | 2 | 2 | 2  | 2  | 1  | 0  | 0  |
| 29 | 2 | 0 | 1 | 2 | 2  | 1  | 2  | 2  | 0  |
| 30 | 2 | 2 | 2 | 2 | 2  | 2  | 1  | 2  | 2  |
| 31 | 2 | 2 | 2 | 2 | 2  | 2  | 2  | 0  | 0  |
| 32 | 2 | 2 | 2 | 2 | 2  | 2  | 2  | 0  | 0  |
| 33 | 2 | 1 | 2 | 2 | 2  | 2  | 2  | 0  | 2  |
| 34 | 1 | 2 | 2 | 2 | 2  | 2  | 1  | 1  | 2  |
| 35 | 1 | 0 | 0 | 1 | 1  | 2  | 1  | 0  | 1  |
| 36 | 2 | 1 | 0 | 2 | 2  | 2  | 1  | 1  | 2  |
| 37 | 2 | 1 | 2 | 2 | 2  | 2  | 1  | 1  | 2  |
| 38 | 2 | 2 | 2 | 2 | 2  | 2  | 1  | 2  | 2  |
| 39 | 2 | 2 | 2 | 2 | 2  | 2  | 1  | 2  | 2  |
| 40 | 1 | 0 | 1 | 2 | 2  | 2  | 1  | 0  | 2  |
| 41 | 2 | 2 | 1 | 2 | 1  | 1  | 1  | 0  | 0  |
| 42 | 2 | 2 | 2 | 2 | 2  | 2  | 2  | 0  | 0  |
| 43 | 2 | 2 | 2 | 2 | 2  | 2  | 2  | 0  | 0  |
| 44 | 2 | 0 | 0 | 2 | 2  | 1  | 2  | 0  | 2  |
| 45 | 2 | 2 | 2 | 2 | 2  | 2  | 1  | 1  | 0  |
| 46 | 2 | 1 | 2 | 2 | 2  | 2  | 1  | 0  | 0  |
| 47 | 2 | 0 | 1 | 2 | 2  | 1  | 2  | 2  | 0  |
| 48 | 2 | 0 | 1 | 2 | 1  | 2  | 0  | 0  | 2  |
| 49 | 2 | 1 | 1 | 2 | 2  | 2  | 2  | 1  | 0  |
| 50 | 1 | 1 | 1 | 2 | 0  | 2  | 2  | 0  | 0  |
| 51 | 2 | 2 | 1 | 2 | 2  | 2  | 1  | 0  | 2  |
| 52 | 2 | 0 | 1 | 2 | 1  | 2  | 1  | 2  | 1  |
| 53 | 1 | 2 | 2 | 2 | 2  | 2  | 1  | 0  | 2  |
| 54 | 2 | 0 | 2 | 2 | 0  | 2  | 2  | 1  | 0  |
| 55 | 2 | 2 | 2 | 2 | 2  | 2  | 1  | 1  | 2  |
| 56 | 2 | 2 | 2 | 2 | 2  | 2  | 1  | 1  | 2  |
| 57 | 2 | 2 | 2 | 2 | 2  | 2  | 1  | 1  | 2  |
| 58 | 2 | 2 | 2 | 2 | 2  | 2  | 1  | 1  | 0  |
| 59 | 2 | 2 | 2 | 2 | 2  | 2  | 1  | 1  | 0  |
| 60 | 0 | 0 | 0 | 0 | 2  | 2  | 1  | 0  | 0  |

|    |   |   |   |   |   |   |   |   |   |
|----|---|---|---|---|---|---|---|---|---|
| 1  |   |   |   |   |   |   |   |   |   |
| 2  | 2 | 2 | 1 | 1 | 2 | 2 | 1 | 0 | 0 |
| 3  | 1 | 0 | 0 | 2 | 2 | 2 | 1 | 0 | 0 |
| 4  | 2 | 2 | 2 | 2 | 1 | 2 | 1 | 1 | 2 |
| 5  | 2 | 0 | 1 | 2 | 2 | 2 | 2 | 1 | 2 |
| 6  | 1 | 1 | 1 | 2 | 1 | 2 | 1 | 1 | 0 |
| 7  | 1 | 0 | 0 | 2 | 1 | 2 | 1 | 0 | 1 |
| 8  | 0 | 1 | 2 | 2 | 1 | 2 | 2 | 0 | 1 |
| 9  | 2 | 2 | 2 | 2 | 2 | 2 | 1 | 2 | 0 |
| 10 | 2 | 0 | 0 | 2 | 2 | 2 | 2 | 0 | 2 |
| 11 | 2 | 0 | 0 | 2 | 2 | 2 | 2 | 0 | 2 |
| 12 | 1 | 0 | 2 | 2 | 2 | 2 | 1 | 2 | 0 |
| 13 | 2 | 0 | 0 | 2 | 2 | 2 | 2 | 0 | 2 |
| 14 | 2 | 1 | 1 | 1 | 2 | 2 | 1 | 2 | 2 |
| 15 | 1 | 1 | 0 | 1 | 1 | 2 | 2 | 2 | 2 |
| 16 | 2 | 0 | 2 | 2 | 2 | 2 | 1 | 0 | 2 |
| 17 | 2 | 1 | 2 | 2 | 2 | 2 | 1 | 1 | 0 |
| 18 | 2 | 2 | 2 | 2 | 2 | 2 | 1 | 1 | 0 |
| 19 | 2 | 2 | 2 | 2 | 2 | 2 | 1 | 1 | 0 |
| 20 | 2 | 2 | 2 | 2 | 2 | 2 | 1 | 1 | 0 |
| 21 | 2 | 2 | 2 | 2 | 2 | 2 | 1 | 1 | 2 |
| 22 | 1 | 0 | 2 | 2 | 2 | 2 | 2 | 1 | 0 |
| 23 | 2 | 0 | 1 | 2 | 2 | 2 | 2 | 0 | 1 |
| 24 | 2 | 2 | 0 | 2 | 2 | 2 | 2 | 0 | 1 |
| 25 | 2 | 0 | 2 | 2 | 2 | 2 | 1 | 0 | 2 |
| 26 | 2 | 1 | 1 | 1 | 1 | 1 | 1 | 0 | 0 |
| 27 | 1 | 1 | 1 | 1 | 1 | 1 | 1 | 0 | 0 |
| 28 | 0 | 0 | 0 | 2 | 2 | 2 | 1 | 0 | 0 |
| 29 | 2 | 0 | 2 | 2 | 2 | 2 | 1 | 0 | 2 |
| 30 | 2 | 0 | 0 | 0 | 1 | 1 | 0 | 1 | 1 |
| 31 | 2 | 0 | 0 | 0 | 1 | 1 | 1 | 1 | 0 |
| 32 | 0 | 0 | 1 | 2 | 2 | 1 | 1 | 1 | 0 |
| 33 | 2 | 1 | 0 | 2 | 1 | 2 | 1 | 2 | 1 |
| 34 | 2 | 2 | 2 | 2 | 2 | 2 | 1 | 1 | 2 |
| 35 | 2 | 2 | 2 | 2 | 2 | 2 | 1 | 2 | 2 |
| 36 | 2 | 2 | 2 | 2 | 2 | 2 | 1 | 1 | 2 |
| 37 | 2 | 2 | 2 | 2 | 2 | 2 | 1 | 1 | 2 |
| 38 | 2 | 2 | 2 | 2 | 2 | 2 | 1 | 1 | 2 |
| 39 | 1 | 0 | 2 | 2 | 2 | 2 | 2 | 1 | 0 |
| 40 | 1 | 0 | 1 | 2 | 1 | 1 | 2 | 0 | 2 |
| 41 | 2 | 1 | 1 | 2 | 2 | 2 | 2 | 1 | 2 |
| 42 | 2 | 2 | 2 | 2 | 2 | 2 | 1 | 2 | 1 |
| 43 | 2 | 2 | 2 | 2 | 2 | 2 | 1 | 2 | 1 |
| 44 | 2 | 2 | 2 | 2 | 2 | 2 | 1 | 0 | 2 |
| 45 | 2 | 2 | 0 | 2 | 2 | 2 | 1 | 0 | 2 |
| 46 | 2 | 2 | 2 | 2 | 2 | 2 | 1 | 0 | 2 |
| 47 | 2 | 0 | 2 | 2 | 2 | 2 | 2 | 1 | 2 |
| 48 | 2 | 0 | 0 | 2 | 0 | 2 | 1 | 0 | 2 |
| 49 | 2 | 1 | 1 | 2 | 2 | 2 | 1 | 0 | 0 |
| 50 | 2 | 0 | 2 | 2 | 2 | 2 | 0 | 0 | 2 |
| 51 | 2 | 0 | 2 | 2 | 2 | 2 | 0 | 0 | 2 |
| 52 | 0 | 2 | 2 | 2 | 2 | 2 | 1 | 0 | 1 |
| 53 | 1 | 2 | 2 | 2 | 1 | 2 | 2 | 0 | 1 |
| 54 | 2 | 0 | 2 | 2 | 2 | 2 | 1 | 1 | 0 |
| 55 | 2 | 0 | 2 | 2 | 2 | 2 | 1 | 1 | 0 |
| 56 | 2 | 0 | 2 | 2 | 1 | 2 | 1 | 1 | 0 |
| 57 | 2 | 0 | 0 | 2 | 2 | 2 | 2 | 0 | 2 |
| 58 |   |   |   |   |   |   |   |   |   |
| 59 |   |   |   |   |   |   |   |   |   |
| 60 |   |   |   |   |   |   |   |   |   |

1  
2  
3  
4  
5  
6  
7  
8  
9  
10  
11  
12  
13  
14  
15  
16  
17  
18  
19  
20  
21  
22  
23  
24  
25  
26  
27  
28  
29  
30  
31  
32  
33  
34  
35  
36  
37  
38  
39  
40  
41  
42  
43  
44  
45  
46  
47  
48  
49  
50  
51  
52  
53  
54  
55  
56  
57  
58  
59  
60

---

| 15 | 16 | 17 | 18 | 19 | 20 | 21 | 22 | 23 |
|----|----|----|----|----|----|----|----|----|
| 2  | 0  | 1  | 2  | 1  | 0  | 0  | 2  | 0  |
| 2  | 0  | 2  | 2  | 0  | 0  | 0  | 2  | 2  |
| 2  | 0  | 1  | 2  | 0  | 0  | 1  | 0  | 0  |
| 2  | 0  | 1  | 2  | 2  | 0  | 1  | 2  | 0  |
| 2  | 0  | 0  | 2  | 0  | 0  | 0  | 2  | 2  |
| 2  | 0  | 1  | 2  | 0  | 0  | 1  | 1  | 0  |
| 2  | 0  | 2  | 2  | 0  | 1  | 0  | 1  | 0  |
| 2  | 0  | 0  | 2  | 0  | 1  | 0  | 2  | 0  |
| 2  | 0  | 2  | 2  | 0  | 2  | 0  | 2  | 1  |
| 1  | 0  | 1  | 1  | 0  | 0  | 2  | 1  | 0  |
| 2  | 0  | 2  | 2  | 0  | 0  | 2  | 2  | 2  |
| 2  | 0  | 1  | 1  | 0  | 0  | 2  | 1  | 0  |
| 2  | 0  | 2  | 2  | 0  | 1  | 0  | 0  | 1  |
| 2  | 0  | 2  | 1  | 1  | 0  | 2  | 2  | 0  |
| 2  | 0  | 0  | 2  | 0  | 1  | 1  | 2  | 2  |
| 2  | 0  | 1  | 2  | 2  | 1  | 2  | 2  | 2  |
| 2  | 0  | 0  | 2  | 1  | 0  | 1  | 2  | 2  |
| 2  | 2  | 2  | 2  | 0  | 1  | 0  | 2  | 0  |
| 2  | 2  | 0  | 2  | 0  | 1  | 0  | 2  | 2  |
| 0  | 0  | 0  | 2  | 0  | 1  | 2  | 0  | 1  |
| 2  | 0  | 1  | 2  | 0  | 0  | 0  | 2  | 0  |
| 2  | 0  | 0  | 2  | 1  | 0  | 2  | 2  | 0  |
| 1  | 0  | 1  | 2  | 0  | 1  | 2  | 2  | 0  |
| 2  | 0  | 1  | 2  | 2  | 0  | 2  | 1  | 0  |
| 0  | 0  | 1  | 1  | 1  | 0  | 2  | 0  | 0  |
| 2  | 0  | 2  | 2  | 1  | 0  | 1  | 1  | 0  |
| 2  | 0  | 1  | 1  | 0  | 0  | 1  | 1  | 2  |
| 2  | 0  | 1  | 2  | 1  | 1  | 0  | 2  | 0  |
| 2  | 0  | 2  | 2  | 1  | 1  | 1  | 2  | 2  |
| 2  | 0  | 1  | 2  | 0  | 0  | 2  | 1  | 0  |
| 1  | 0  | 0  | 2  | 1  | 0  | 2  | 1  | 2  |
| 2  | 0  | 0  | 2  | 1  | 1  | 2  | 2  | 1  |
| 2  | 0  | 0  | 1  | 0  | 0  | 1  | 1  | 0  |
| 2  | 0  | 2  | 2  | 0  | 1  | 0  | 2  | 0  |
| 2  | 0  | 1  | 2  | 0  | 0  | 2  | 1  | 0  |
| 2  | 2  | 1  | 2  | 0  | 1  | 2  | 2  | 0  |
| 2  | 0  | 1  | 2  | 0  | 1  | 2  | 2  | 0  |
| 2  | 2  | 0  | 2  | 1  | 1  | 1  | 2  | 0  |
| 2  | 0  | 0  | 2  | 0  | 1  | 0  | 2  | 2  |
| 2  | 0  | 1  | 2  | 2  | 0  | 1  | 0  | 0  |
| 2  | 0  | 0  | 2  | 0  | 0  | 2  | 2  | 1  |

|    |   |   |   |   |   |   |   |   |   |
|----|---|---|---|---|---|---|---|---|---|
| 1  |   |   |   |   |   |   |   |   |   |
| 2  | 2 | 0 | 1 | 2 | 1 | 1 | 1 | 0 | 0 |
| 3  | 2 | 0 | 0 | 2 | 1 | 0 | 1 | 2 | 0 |
| 4  | 2 | 0 | 1 | 1 | 2 | 0 | 1 | 2 | 2 |
| 5  | 2 | 2 | 2 | 1 | 2 | 1 | 2 | 1 | 1 |
| 6  | 0 | 0 | 0 | 2 | 1 | 0 | 1 | 0 | 0 |
| 7  |   |   |   |   |   |   |   |   |   |
| 8  | 2 | 2 | 1 | 2 | 1 | 1 | 1 | 2 | 2 |
| 9  | 1 | 1 | 0 | 2 | 2 | 1 | 2 | 2 | 0 |
| 10 | 2 | 1 | 0 | 2 | 1 | 0 | 0 | 2 | 0 |
| 11 | 2 | 1 | 0 | 2 | 1 | 1 | 1 | 2 | 2 |
| 12 | 2 | 0 | 0 | 2 | 1 | 0 | 0 | 2 | 0 |
| 13 | 2 | 0 | 0 | 2 | 1 | 0 | 0 | 2 | 0 |
| 14 | 2 | 1 | 0 | 2 | 1 | 1 | 1 | 2 | 2 |
| 15 | 2 | 2 | 1 | 2 | 2 | 0 | 0 | 2 | 0 |
| 16 | 1 | 0 | 1 | 0 | 0 | 0 | 2 | 0 | 0 |
| 17 | 2 | 0 | 1 | 2 | 0 | 0 | 0 | 2 | 0 |
| 18 | 2 | 0 | 1 | 2 | 0 | 0 | 2 | 0 | 0 |
| 19 | 2 | 0 | 0 | 2 | 0 | 0 | 1 | 0 | 0 |
| 20 | 2 | 0 | 0 | 2 | 0 | 0 | 0 | 2 | 0 |
| 21 | 2 | 2 | 0 | 2 | 0 | 0 | 0 | 2 | 0 |
| 22 | 2 | 0 | 1 | 2 | 0 | 0 | 0 | 0 | 2 |
| 23 | 2 | 0 | 0 | 2 | 0 | 0 | 1 | 0 | 2 |
| 24 | 2 | 0 | 0 | 2 | 0 | 0 | 0 | 2 | 2 |
| 25 | 2 | 2 | 0 | 1 | 2 | 0 | 0 | 2 | 2 |
| 26 | 2 | 0 | 2 | 2 | 0 | 0 | 2 | 2 | 0 |
| 27 | 2 | 0 | 0 | 2 | 0 | 1 | 0 | 2 | 0 |
| 28 | 2 | 2 | 1 | 2 | 2 | 0 | 0 | 2 | 2 |
| 29 | 2 | 1 | 2 | 1 | 0 | 1 | 2 | 1 | 0 |
| 30 | 2 | 1 | 1 | 2 | 2 | 1 | 1 | 1 | 2 |
| 31 | 2 | 1 | 1 | 2 | 2 | 1 | 0 | 2 | 1 |
| 32 | 2 | 0 | 2 | 2 | 1 | 0 | 0 | 2 | 2 |
| 33 | 2 | 1 | 1 | 2 | 1 | 0 | 1 | 2 | 2 |
| 34 | 2 | 0 | 1 | 2 | 0 | 0 | 2 | 2 | 0 |
| 35 | 2 | 0 | 2 | 2 | 0 | 0 | 2 | 2 | 0 |
| 36 | 2 | 0 | 2 | 2 | 0 | 0 | 2 | 2 | 0 |
| 37 | 2 | 0 | 2 | 2 | 0 | 0 | 2 | 2 | 0 |
| 38 | 1 | 0 | 2 | 1 | 1 | 0 | 0 | 1 | 2 |
| 39 | 2 | 1 | 1 | 1 | 2 | 1 | 1 | 1 | 0 |
| 40 | 2 | 0 | 2 | 1 | 1 | 0 | 2 | 0 | 2 |
| 41 | 2 | 0 | 2 | 1 | 2 | 0 | 2 | 2 | 2 |
| 42 | 2 | 0 | 1 | 2 | 1 | 0 | 1 | 2 | 2 |
| 43 | 2 | 2 | 0 | 2 | 2 | 0 | 2 | 2 | 1 |
| 44 | 2 | 0 | 0 | 2 | 1 | 0 | 2 | 0 | 2 |
| 45 | 2 | 0 | 2 | 2 | 1 | 2 | 2 | 2 | 2 |
| 46 | 2 | 0 | 2 | 2 | 0 | 0 | 0 | 2 | 1 |
| 47 | 2 | 0 | 0 | 2 | 2 | 0 | 0 | 0 | 2 |
| 48 | 2 | 0 | 0 | 2 | 2 | 0 | 0 | 0 | 2 |
| 49 | 2 | 1 | 0 | 2 | 2 | 0 | 1 | 1 | 2 |
| 50 | 2 | 2 | 1 | 2 | 0 | 0 | 2 | 1 | 2 |
| 51 | 2 | 2 | 2 | 2 | 0 | 0 | 2 | 1 | 0 |
| 52 | 2 | 1 | 0 | 2 | 1 | 1 | 1 | 2 | 2 |
| 53 | 2 | 0 | 0 | 2 | 2 | 0 | 0 | 0 | 2 |
| 54 | 2 | 1 | 0 | 2 | 2 | 0 | 1 | 1 | 2 |
| 55 | 2 | 2 | 1 | 2 | 0 | 0 | 2 | 1 | 2 |
| 56 | 2 | 2 | 2 | 2 | 0 | 0 | 2 | 1 | 0 |
| 57 | 2 | 1 | 0 | 2 | 1 | 1 | 1 | 2 | 2 |
| 58 |   |   |   |   |   |   |   |   |   |
| 59 |   |   |   |   |   |   |   |   |   |
| 60 |   |   |   |   |   |   |   |   |   |

1  
2  
3  
4  
5  
6  
7  
8  
9  
10  
11  
12  
13  
14  
15  
16  
17  
18  
19  
20  
21  
22  
23  
24  
25  
26  
27  
28  
29  
30  
31  
32  
33  
34  
35  
36  
37  
38  
39  
40  
41  
42  
43  
44  
45  
46  
47  
48  
49  
50  
51  
52  
53  
54  
55  
56  
57  
58  
59  
60

---

| 24 | 25 | 26 | 27 | 28 | 29 | 30 |   |
|----|----|----|----|----|----|----|---|
| 2  | 2  | 2  | 2  | 0  | 1  | 1  | 0 |
| 2  | 2  | 2  | 2  | 2  | 0  | 2  | 2 |
| 0  | 0  | 2  | 2  | 0  | 2  | 2  | 2 |
| 0  | 2  | 2  | 2  | 0  | 0  | 0  | 0 |
| 0  | 2  | 2  | 2  | 2  | 0  | 2  | 0 |
| 0  | 1  | 1  | 0  | 0  | 0  | 0  | 0 |
| 0  | 2  | 2  | 2  | 2  | 0  | 2  | 0 |
| 2  | 2  | 2  | 2  | 2  | 2  | 2  | 0 |
| 2  | 2  | 2  | 2  | 2  | 1  | 2  | 0 |
| 0  | 1  | 0  | 0  | 0  | 0  | 0  | 0 |
| 2  | 2  | 2  | 2  | 2  | 2  | 2  | 0 |
| 0  | 1  | 0  | 0  | 0  | 0  | 0  | 0 |
| 1  | 2  | 2  | 2  | 1  | 0  | 2  | 2 |
| 1  | 1  | 0  | 2  | 2  | 1  | 2  | 0 |
| 2  | 2  | 2  | 2  | 2  | 0  | 2  | 0 |
| 1  | 2  | 2  | 2  | 0  | 0  | 1  | 0 |
| 0  | 2  | 2  | 2  | 2  | 0  | 0  | 0 |
| 0  | 1  | 2  | 2  | 1  | 0  | 2  | 0 |
| 1  | 1  | 2  | 2  | 1  | 2  | 2  | 0 |
| 0  | 1  | 1  | 0  | 0  | 0  | 1  | 0 |
| 2  | 2  | 2  | 2  | 0  | 0  | 2  | 1 |
| 2  | 2  | 2  | 2  | 2  | 2  | 2  | 0 |
| 2  | 0  | 2  | 2  | 2  | 2  | 2  | 0 |
| 2  | 0  | 1  | 0  | 0  | 1  | 1  | 0 |
| 2  | 2  | 2  | 2  | 0  | 2  | 2  | 0 |
| 2  | 2  | 2  | 2  | 0  | 2  | 2  | 0 |
| 2  | 2  | 2  | 2  | 0  | 1  | 2  | 0 |
| 2  | 2  | 1  | 0  | 2  | 2  | 2  | 0 |
| 1  | 2  | 2  | 0  | 0  | 0  | 0  | 2 |
| 1  | 2  | 2  | 2  | 2  | 1  | 2  | 0 |
| 2  | 2  | 2  | 2  | 2  | 2  | 2  | 0 |
| 2  | 2  | 2  | 2  | 2  | 1  | 2  | 2 |
| 0  | 0  | 0  | 2  | 2  | 1  | 0  | 0 |
| 2  | 2  | 2  | 2  | 2  | 2  | 2  | 2 |
| 0  | 2  | 1  | 0  | 0  | 0  | 0  | 0 |
| 0  | 2  | 0  | 0  | 0  | 0  | 0  | 0 |
| 0  | 2  | 0  | 0  | 0  | 0  | 0  | 2 |
| 2  | 2  | 2  | 2  | 2  | 2  | 2  | 2 |
| 2  | 2  | 2  | 2  | 2  | 2  | 2  | 0 |
| 2  | 2  | 2  | 2  | 2  | 0  | 2  | 0 |
| 2  | 2  | 2  | 2  | 2  | 0  | 2  | 0 |



|    |   |   |   |   |   |   |   |
|----|---|---|---|---|---|---|---|
| 1  |   |   |   |   |   |   |   |
| 2  | 2 | 1 | 0 | 0 | 2 | 2 | 2 |
| 3  | 0 | 2 | 2 | 0 | 0 | 0 | 0 |
| 4  | 2 | 2 | 2 | 2 | 2 | 2 | 2 |
| 5  | 2 | 2 | 2 | 2 | 2 | 2 | 0 |
| 6  | 2 | 2 | 2 | 2 | 0 | 0 | 2 |
| 7  | 2 | 2 | 1 | 0 | 0 | 2 | 0 |
| 8  | 2 | 2 | 2 | 0 | 0 | 1 | 0 |
| 9  | 2 | 2 | 2 | 0 | 0 | 1 | 0 |
| 10 | 0 | 2 | 2 | 0 | 0 | 1 | 0 |
| 11 | 2 | 0 | 0 | 2 | 2 | 2 | 0 |
| 12 | 0 | 2 | 2 | 0 | 0 | 1 | 0 |
| 13 | 2 | 0 | 0 | 2 | 2 | 2 | 0 |
| 14 | 2 | 2 | 2 | 1 | 2 | 2 | 1 |
| 15 | 2 | 2 | 2 | 0 | 0 | 2 | 0 |
| 16 | 0 | 2 | 2 | 0 | 0 | 2 | 0 |
| 17 | 2 | 2 | 2 | 2 | 2 | 0 | 2 |
| 18 | 0 | 2 | 2 | 0 | 0 | 0 | 0 |
| 19 | 0 | 2 | 2 | 0 | 0 | 0 | 0 |
| 20 | 0 | 2 | 2 | 0 | 0 | 0 | 0 |
| 21 | 2 | 2 | 2 | 2 | 0 | 2 | 2 |
| 22 | 1 | 2 | 2 | 0 | 0 | 2 | 0 |
| 23 | 0 | 1 | 2 | 2 | 0 | 0 | 0 |
| 24 | 2 | 2 | 1 | 0 | 1 | 2 | 2 |
| 25 | 2 | 1 | 1 | 2 | 0 | 2 | 0 |
| 26 | 2 | 2 | 2 | 1 | 0 | 0 | 0 |
| 27 | 2 | 1 | 1 | 2 | 2 | 2 | 0 |
| 28 | 2 | 2 | 2 | 1 | 1 | 1 | 0 |
| 29 | 2 | 2 | 2 | 1 | 2 | 2 | 1 |
| 30 | 2 | 2 | 2 | 2 | 1 | 2 | 0 |
| 31 | 2 | 2 | 2 | 2 | 0 | 1 | 0 |
| 32 | 2 | 2 | 2 | 0 | 0 | 2 | 2 |
| 33 | 2 | 2 | 2 | 2 | 2 | 1 | 0 |
| 34 | 2 | 2 | 2 | 0 | 0 | 2 | 2 |
| 35 | 2 | 2 | 2 | 2 | 2 | 2 | 0 |
| 36 | 2 | 2 | 2 | 2 | 2 | 1 | 2 |
| 37 | 2 | 2 | 2 | 0 | 2 | 2 | 2 |
| 38 | 2 | 2 | 1 | 1 | 1 | 2 | 0 |
| 39 | 0 | 0 | 0 | 1 | 1 | 1 | 0 |
| 40 | 2 | 2 | 2 | 2 | 2 | 2 | 0 |
| 41 | 0 | 2 | 2 | 1 | 0 | 1 | 2 |
| 42 | 2 | 1 | 1 | 2 | 2 | 2 | 0 |
| 43 | 0 | 2 | 2 | 0 | 1 | 2 | 2 |
| 44 | 2 | 1 | 1 | 2 | 2 | 2 | 0 |
| 45 | 0 | 2 | 2 | 0 | 1 | 2 | 2 |
| 46 | 2 | 1 | 1 | 2 | 2 | 2 | 0 |
| 47 | 2 | 2 | 2 | 2 | 0 | 2 | 2 |
| 48 | 2 | 2 | 2 | 2 | 2 | 2 | 0 |
| 49 | 2 | 2 | 2 | 2 | 2 | 2 | 0 |
| 50 | 2 | 2 | 2 | 2 | 2 | 2 | 0 |
| 51 | 2 | 2 | 2 | 1 | 1 | 1 | 0 |
| 52 | 2 | 2 | 2 | 2 | 0 | 2 | 0 |
| 53 | 2 | 0 | 0 | 2 | 0 | 2 | 0 |
| 54 | 2 | 1 | 2 | 0 | 2 | 2 | 2 |
| 55 | 2 | 2 | 2 | 0 | 2 | 2 | 2 |
| 56 | 2 | 0 | 2 | 2 | 2 | 2 | 0 |
| 57 | 2 |   |   |   |   |   |   |
| 58 |   |   |   |   |   |   |   |
| 59 |   |   |   |   |   |   |   |
| 60 |   |   |   |   |   |   |   |

1  
2  
3  
4  
5  
6  
7  
8  
9  
10  
11  
12  
13  
14  
15  
16  
17  
18  
19  
20  
21  
22  
23  
24  
25  
26  
27  
28  
29  
30  
31  
32  
33  
34  
35  
36  
37  
38  
39  
40  
41  
42  
43  
44  
45  
46  
47  
48  
49  
50  
51  
52  
53  
54  
55  
56  
57  
58  
59  
60

---

| 31 | 32 | 33 | 34 | 35 | 36 | 37 |
|----|----|----|----|----|----|----|
| 0  | 2  | 2  | 0  | 0  | 0  | 1  |
| 0  | 2  | 2  | 2  | 2  | 0  | 1  |
| 0  | 2  | 0  | 2  | 0  | 0  | 1  |
| 0  | 2  | 2  | 2  | 2  | 1  | 2  |
| 0  | 0  | 2  | 0  | 1  | 1  | 1  |
| 0  | 2  | 2  | 2  | 0  | 0  | 1  |
| 2  | 0  | 1  | 0  | 2  | 1  | 1  |
| 2  | 1  | 2  | 2  | 1  | 1  | 1  |
| 0  | 2  | 2  | 0  | 1  | 1  | 1  |
| 2  | 0  | 2  | 2  | 1  | 0  | 2  |
| 0  | 1  | 1  | 0  | 2  | 1  | 1  |
| 0  | 2  | 2  | 2  | 0  | 0  | 1  |
| 0  | 1  | 0  | 1  | 1  | 0  | 1  |
| 0  | 2  | 2  | 2  | 0  | 0  | 1  |
| 0  | 2  | 2  | 2  | 2  | 0  | 2  |
| 0  | 2  | 0  | 1  | 1  | 1  | 1  |
| 0  | 2  | 0  | 0  | 1  | 0  | 1  |
| 0  | 2  | 1  | 2  | 1  | 1  | 2  |
| 0  | 2  | 2  | 0  | 2  | 1  | 2  |
| 0  | 1  | 2  | 0  | 1  | 1  | 2  |
| 0  | 2  | 2  | 2  | 1  | 2  | 2  |
| 2  | 0  | 2  | 2  | 1  | 1  | 1  |
| 0  | 2  | 2  | 2  | 2  | 0  | 1  |
| 0  | 1  | 0  | 0  | 2  | 0  | 2  |
| 0  | 1  | 2  | 0  | 2  | 2  | 1  |
| 0  | 2  | 2  | 2  | 1  | 1  | 1  |
| 2  | 2  | 2  | 0  | 0  | 0  | 1  |
| 2  | 2  | 2  | 0  | 0  | 0  | 1  |
| 0  | 2  | 2  | 2  | 2  | 2  | 1  |
| 0  | 2  | 0  | 2  | 0  | 0  | 1  |
| 2  | 2  | 2  | 0  | 2  | 2  | 1  |
| 0  | 2  | 1  | 2  | 1  | 1  | 1  |
| 0  | 0  | 1  | 1  | 0  | 0  | 1  |
| 2  | 2  | 2  | 2  | 0  | 2  | 1  |
| 0  | 1  | 0  | 0  | 1  | 2  | 1  |
| 0  | 2  | 1  | 1  | 1  | 0  | 2  |
| 0  | 2  | 0  | 0  | 2  | 0  | 0  |
| 0  | 2  | 2  | 2  | 0  | 0  | 1  |
| 0  | 2  | 2  | 0  | 2  | 1  | 1  |
| 0  | 2  | 0  | 0  | 2  | 2  | 1  |
| 0  | 1  | 2  | 2  | 0  | 0  | 2  |

|    |   |   |   |   |   |   |   |
|----|---|---|---|---|---|---|---|
| 1  |   |   |   |   |   |   |   |
| 2  | 0 | 2 | 0 | 2 | 2 | 2 | 1 |
| 3  | 0 | 2 | 2 | 2 | 1 | 0 | 1 |
| 4  | 0 | 2 | 0 | 2 | 2 | 1 | 1 |
| 5  | 2 | 2 | 2 | 2 | 2 | 2 | 1 |
| 6  | 0 | 1 | 0 | 0 | 0 | 1 | 1 |
| 7  | 0 | 2 | 2 | 2 | 0 | 0 | 1 |
| 8  | 0 | 0 | 1 | 1 | 1 | 1 | 1 |
| 9  | 0 | 1 | 1 | 1 | 1 | 1 | 1 |
| 10 | 2 | 2 | 2 | 2 | 0 | 0 | 1 |
| 11 | 1 | 0 | 1 | 1 | 0 | 0 | 2 |
| 12 | 2 | 1 | 1 | 2 | 0 | 0 | 0 |
| 13 | 0 | 2 | 2 | 2 | 2 | 0 | 1 |
| 14 | 0 | 2 | 0 | 0 | 1 | 1 | 2 |
| 15 | 0 | 2 | 2 | 2 | 0 | 0 | 1 |
| 16 | 0 | 2 | 2 | 2 | 0 | 0 | 1 |
| 17 | 0 | 2 | 2 | 0 | 0 | 0 | 1 |
| 18 | 0 | 2 | 2 | 0 | 0 | 0 | 1 |
| 19 | 0 | 1 | 0 | 0 | 2 | 0 | 1 |
| 20 | 0 | 2 | 2 | 2 | 2 | 0 | 1 |
| 21 | 0 | 1 | 1 | 2 | 1 | 1 | 2 |
| 22 | 0 | 2 | 0 | 2 | 2 | 1 | 1 |
| 23 | 2 | 2 | 2 | 2 | 0 | 0 | 2 |
| 24 | 0 | 2 | 2 | 0 | 2 | 1 | 1 |
| 25 | 0 | 2 | 2 | 0 | 2 | 1 | 1 |
| 26 | 0 | 2 | 1 | 2 | 0 | 0 | 2 |
| 27 | 1 | 2 | 2 | 2 | 2 | 0 | 1 |
| 28 | 2 | 2 | 2 | 2 | 2 | 1 | 1 |
| 29 | 0 | 2 | 2 | 2 | 1 | 1 | 1 |
| 30 | 0 | 1 | 2 | 0 | 1 | 0 | 1 |
| 31 | 0 | 1 | 2 | 0 | 1 | 0 | 1 |
| 32 | 0 | 2 | 2 | 2 | 1 | 0 | 1 |
| 33 | 0 | 2 | 2 | 2 | 2 | 2 | 1 |
| 34 | 0 | 2 | 2 | 2 | 2 | 2 | 1 |
| 35 | 0 | 2 | 2 | 2 | 2 | 2 | 1 |
| 36 | 0 | 2 | 2 | 2 | 2 | 2 | 1 |
| 37 | 0 | 2 | 2 | 2 | 1 | 0 | 1 |
| 38 | 0 | 0 | 2 | 0 | 1 | 2 | 1 |
| 39 | 0 | 2 | 1 | 1 | 0 | 0 | 1 |
| 40 | 0 | 2 | 0 | 0 | 2 | 0 | 2 |
| 41 | 0 | 2 | 2 | 1 | 1 | 1 | 1 |
| 42 | 2 | 2 | 2 | 2 | 0 | 0 | 1 |
| 43 | 2 | 2 | 2 | 2 | 1 | 1 | 1 |
| 44 | 2 | 2 | 2 | 2 | 0 | 0 | 1 |
| 45 | 2 | 2 | 2 | 2 | 0 | 0 | 1 |
| 46 | 2 | 2 | 2 | 2 | 0 | 0 | 1 |
| 47 | 0 | 2 | 2 | 2 | 1 | 1 | 1 |
| 48 | 2 | 2 | 2 | 0 | 0 | 0 | 1 |
| 49 | 0 | 2 | 2 | 2 | 0 | 2 | 1 |
| 50 | 0 | 0 | 2 | 0 | 1 | 0 | 1 |
| 51 | 0 | 1 | 2 | 2 | 1 | 0 | 1 |
| 52 | 2 | 1 | 2 | 2 | 1 | 0 | 2 |
| 53 | 0 | 2 | 2 | 2 | 2 | 0 | 1 |
| 54 | 0 | 2 | 2 | 2 | 1 | 0 | 1 |
| 55 | 2 | 2 | 2 | 2 | 0 | 0 | 2 |
| 56 | 0 | 2 | 2 | 2 | 1 | 0 | 1 |
| 57 | 2 | 2 | 2 | 2 | 0 | 0 | 0 |
| 58 |   |   |   |   |   |   |   |
| 59 |   |   |   |   |   |   |   |
| 60 |   |   |   |   |   |   |   |

1  
2  
3  
4  
5  
6  
7  
8  
9  
10  
11  
12  
13  
14  
15  
16  
17  
18  
19  
20  
21  
22  
23  
24  
25  
26  
27  
28  
29  
30  
31  
32  
33  
34  
35  
36  
37  
38  
39  
40  
41  
42  
43  
44  
45  
46  
47  
48  
49  
50  
51  
52  
53  
54  
55  
56  
57  
58  
59  
60

| 38 | 39 | 40 |
|----|----|----|
| 1  | 1  | 0  |
| 1  | 2  | 2  |
| 1  | 2  | 0  |
| 1  | 2  | 0  |
| 1  | 0  | 0  |
| 1  | 2  | 0  |
| 1  | 2  | 0  |
| 1  | 2  | 2  |
| 1  | 0  | 0  |
| 1  | 2  | 0  |
| 1  | 0  | 0  |
| 1  | 2  | 0  |
| 1  | 0  | 0  |
| 1  | 1  | 1  |
| 2  | 0  | 0  |
| 1  | 2  | 0  |
| 2  | 0  | 2  |
| 1  | 0  | 2  |
| 2  | 2  | 0  |
| 1  | 1  | 0  |
| 1  | 0  | 0  |
| 1  | 0  | 2  |
| 2  | 0  | 0  |
| 2  | 1  | 0  |
| 2  | 1  | 0  |
| 1  | 2  | 0  |
| 1  | 1  | 0  |
| 1  | 0  | 2  |
| 1  | 0  | 2  |
| 1  | 2  | 1  |
| 1  | 1  | 0  |
| 1  | 2  | 0  |
| 1  | 1  | 0  |
| 1  | 2  | 0  |
| 2  | 2  | 2  |
| 1  | 2  | 0  |
| 1  | 0  | 2  |
| 1  | 2  | 0  |
| 2  | 1  | 0  |

**SURVEY SCORE (POST)**

|    |
|----|
| 47 |
| 61 |
| 46 |
| 46 |
| 46 |
| 45 |
| 46 |
| 51 |
| 47 |
| 37 |
| 54 |
| 39 |
| 43 |
| 52 |
| 39 |
| 55 |
| 50 |
| 52 |
| 53 |
| 30 |
| 49 |
| 55 |
| 53 |
| 37 |
| 46 |
| 55 |
| 48 |
| 51 |
| 55 |
| 45 |
| 54 |
| 59 |
| 26 |
| 61 |
| 36 |
| 45 |
| 41 |
| 61 |
| 57 |
| 51 |
| 37 |

|    |   |   |   |    |
|----|---|---|---|----|
| 1  |   |   |   |    |
| 2  | 1 | 2 | 0 | 49 |
| 3  | 1 | 2 | 0 | 40 |
| 4  | 1 | 2 | 1 | 59 |
| 5  | 1 | 1 | 2 | 67 |
| 6  | 1 | 2 | 0 | 40 |
| 7  | 1 | 2 | 0 | 42 |
| 8  | 2 | 0 | 0 | 44 |
| 9  | 1 | 2 | 2 | 46 |
| 10 | 1 | 1 | 2 | 49 |
| 11 | 1 | 0 | 0 | 40 |
| 12 | 2 | 1 | 1 | 48 |
| 13 | 1 | 0 | 2 | 60 |
| 14 | 1 | 2 | 2 | 39 |
| 15 | 2 | 1 | 0 | 50 |
| 16 | 1 | 0 | 2 | 40 |
| 17 | 1 | 0 | 0 | 39 |
| 18 | 1 | 1 | 0 | 58 |
| 19 | 1 | 2 | 0 | 44 |
| 20 | 1 | 2 | 2 | 45 |
| 21 | 2 | 0 | 1 | 54 |
| 22 | 1 | 0 | 2 | 53 |
| 23 | 2 | 2 | 0 | 42 |
| 24 | 1 | 2 | 0 | 43 |
| 25 | 1 | 0 | 1 | 58 |
| 26 | 1 | 2 | 0 | 48 |
| 27 | 1 | 1 | 0 | 47 |
| 28 | 1 | 1 | 0 | 50 |
| 29 | 1 | 0 | 0 | 56 |
| 30 | 1 | 2 | 2 | 66 |
| 31 | 1 | 0 | 1 | 61 |
| 32 | 1 | 0 | 0 | 57 |
| 33 | 1 | 0 | 0 | 44 |
| 34 | 1 | 0 | 0 | 36 |
| 35 | 2 | 0 | 0 | 55 |
| 36 | 1 | 0 | 0 | 56 |
| 37 | 1 | 2 | 0 | 58 |
| 38 | 1 | 0 | 0 | 57 |
| 39 | 1 | 0 | 0 | 58 |
| 40 | 1 | 0 | 0 | 61 |
| 41 | 2 | 0 | 0 | 46 |
| 42 | 1 | 0 | 0 | 59 |
| 43 | 1 | 2 | 0 | 45 |
| 44 | 1 | 0 | 0 | 46 |
| 45 | 1 | 2 | 0 | 49 |
| 46 | 1 | 2 | 0 | 53 |
| 47 | 1 | 2 | 0 | 51 |
| 48 | 1 | 1 | 0 | 52 |
| 49 | 1 | 2 | 0 |    |
| 50 | 1 | 2 | 2 |    |
| 51 | 1 | 2 | 2 |    |
| 52 | 1 | 2 | 0 |    |
| 53 | 1 | 2 | 0 |    |
| 54 | 1 | 0 | 0 |    |
| 55 | 1 | 0 | 0 |    |
| 56 | 1 | 0 | 0 |    |
| 57 | 1 | 0 | 2 |    |
| 58 |   |   |   |    |
| 59 |   |   |   |    |
| 60 |   |   |   |    |

# BMJ Open

## Improving community pharmacists' clinical knowledge to detect and resolve drug-related problems in Croatia: a before/after survey study investigating the effectiveness of an educational intervention

|                                 |                                                                                                                                                                                                                                                                                                                                                                                                                                                                                                                                                                                                                                        |
|---------------------------------|----------------------------------------------------------------------------------------------------------------------------------------------------------------------------------------------------------------------------------------------------------------------------------------------------------------------------------------------------------------------------------------------------------------------------------------------------------------------------------------------------------------------------------------------------------------------------------------------------------------------------------------|
| Journal:                        | <i>BMJ Open</i>                                                                                                                                                                                                                                                                                                                                                                                                                                                                                                                                                                                                                        |
| Manuscript ID                   | bmjopen-2019-034674.R1                                                                                                                                                                                                                                                                                                                                                                                                                                                                                                                                                                                                                 |
| Article Type:                   | Original research                                                                                                                                                                                                                                                                                                                                                                                                                                                                                                                                                                                                                      |
| Date Submitted by the Author:   | 26-Dec-2019                                                                                                                                                                                                                                                                                                                                                                                                                                                                                                                                                                                                                            |
| Complete List of Authors:       | Zekan, Lovre; Split-Dalmatia County Pharmacy; University of Split School of Medicine, Department of Pharmacy<br>Mestrovic, Arijana; University of Split School of Medicine, Department of Pharmacy; Pharmaexpert LLC<br>Perisin, Ana; University of Split School of Medicine, Department of Pharmacy<br>Bukic, Josipa; University of Split School of Medicine, Department of Pharmacy<br>Leskur, Dario; University of Split School of Medicine, Department of Pharmacy<br>Rusic, Doris; University of Split School of Medicine, Department of Pharmacy<br>Modun, Darko; University of Split School of Medicine, Department of Pharmacy |
| <b>Primary Subject Heading</b>: | Medical education and training                                                                                                                                                                                                                                                                                                                                                                                                                                                                                                                                                                                                         |
| Secondary Subject Heading:      | Public health, General practice / Family practice, Pharmacology and therapeutics                                                                                                                                                                                                                                                                                                                                                                                                                                                                                                                                                       |
| Keywords:                       | EDUCATION & TRAINING (see Medical Education & Training), THERAPEUTICS, PRIMARY CARE                                                                                                                                                                                                                                                                                                                                                                                                                                                                                                                                                    |
|                                 |                                                                                                                                                                                                                                                                                                                                                                                                                                                                                                                                                                                                                                        |

SCHOLARONE™  
Manuscripts



I, the Submitting Author has the right to grant and does grant on behalf of all authors of the Work (as defined in the below author licence), an exclusive licence and/or a non-exclusive licence for contributions from authors who are: i) UK Crown employees; ii) where BMJ has agreed a CC-BY licence shall apply, and/or iii) in accordance with the terms applicable for US Federal Government officers or employees acting as part of their official duties; on a worldwide, perpetual, irrevocable, royalty-free basis to BMJ Publishing Group Ltd ("BMJ") its licensees and where the relevant Journal is co-owned by BMJ to the co-owners of the Journal, to publish the Work in this journal and any other BMJ products and to exploit all rights, as set out in our [licence](#).

The Submitting Author accepts and understands that any supply made under these terms is made by BMJ to the Submitting Author unless you are acting as an employee on behalf of your employer or a postgraduate student of an affiliated institution which is paying any applicable article publishing charge ("APC") for Open Access articles. Where the Submitting Author wishes to make the Work available on an Open Access basis (and intends to pay the relevant APC), the terms of reuse of such Open Access shall be governed by a Creative Commons licence – details of these licences and which [Creative Commons](#) licence will apply to this Work are set out in our licence referred to above.

Other than as permitted in any relevant BMJ Author's Self Archiving Policies, I confirm this Work has not been accepted for publication elsewhere, is not being considered for publication elsewhere and does not duplicate material already published. I confirm all authors consent to publication of this Work and authorise the granting of this licence.

1  
2  
3 **1 Improving community pharmacists' clinical knowledge to detect and resolve**  
4  
5  
6 **2 drug-related problems in Croatia: a before/after survey study investigating**  
7  
8 **3 the effectiveness of an educational intervention**  
9  
10  
11  
12 **4**

13 Lovre Zekan<sup>1,2</sup>, Arijana Mestrovic<sup>2,3</sup>, Ana Seselja Perisin<sup>2</sup>, Josipa Bukic<sup>2</sup>, Dario Leskur<sup>2</sup>, Doris  
14  
15  
16 Rusic<sup>2</sup>, Darko Modun<sup>2\*</sup>  
17  
18  
19

20  
21 <sup>1</sup>Split-Dalmatia County Pharmacy, Split, Croatia  
22

23 <sup>2</sup>Department of Pharmacy, University of Split School of Medicine, Split, Croatia  
24

25 <sup>3</sup>Pharmaexpert LLC, Zagreb, Croatia  
26  
27  
28  
29  
30

31  
32

33 \*Corresponding author:  
34

35 Darko Modun  
36

37 Department of Pharmacy  
38

39 University of Split School of Medicine  
40

41 Soltanska 2, 21000 Split  
42

43 Croatia  
44

45 Phone: +38521557851, Fax: +38521557895, E-mail: [dmodun@mefst.hr](mailto:dmodun@mefst.hr)  
46  
47  
48

49

50 **21 Word count: 3419**  
51  
52  
53  
54  
55  
56  
57  
58  
59  
60



## Abstract

**Objectives:** The aim of this study was to increase the knowledge level of community pharmacists in Croatia to identify and resolve drug-related problems (DRPs).

**Design:** Before/after survey study.

**Setting:** University of Split School of Medicine.

**Participants:** 115 community pharmacists from all over the Croatia.

**Interventions:** An interactive three-day clinical pharmacy workshop with the goal of increasing the knowledge level of community pharmacists in Croatia to identify and resolve DRPs in routine practice. Teaching methods were based on interactive clinical case solving.

**Outcome measure:** Change of the community pharmacists' knowledge based on pre- and post-workshop evaluation. Survey-based clinical knowledge measurement tool was used in order to evaluate the effectiveness of the workshop. The lowest possible total score was 0 and the highest was 80. A higher survey score indicates a higher level of clinical knowledge to identify and resolve DRPs.

**Results:** Participating pharmacists had significantly higher post-workshop mean survey score ( $49.1 \pm 8.0$ ) than the pre-workshop mean survey score ( $42.9 \pm 8.2$ ), with the mean score difference of 6.2 (95% CI: 4.3 to 8.1). Furthermore, it was found that community pharmacists significantly increased their survey scores, regardless of their age.

**Conclusions:** Interactive and case-based clinical pharmacy workshop could be a valuable tool to increase the knowledge of community pharmacists about identification and management of DRPs in routine practice. However, further studies are necessary to evaluate the long-term knowledge maintenance and the improvement in patients' clinical outcomes.

## 46 **Article Summary**

### 47 **Strengths and limitations of this study**

48

49 • This study included 115 community pharmacists from all over the country, and out of  
50 them 88 completed the survey both times (response rate 76,5%), which is about 4% of all  
51 community pharmacists in Croatia.

52 • Educational intervention was interactive and case-based, and survey-based clinical  
53 knowledge measurement tool was validated previously and successfully used in  
54 Australia.

55 • Follow-up evaluations are needed in order to evaluate the long-term effectiveness of the  
56 educational intervention.

57 • The participation was voluntary and this could compromise the representativeness of the  
58 sample.

## 59 **Introduction**

60 Drug-related problems (DRPs) represent a public health problem, both in terms of patient  
61 outcomes and healthcare expenditures, as they can ultimately lead to drug-related complications,  
62 such as drug-related morbidity or mortality. Community pharmacists, as contributors to patient  
63 care, should assess data concerning untoward effects of drugs and be well skilled to recognize  
64 and prevent these drug-related complications, which result from unidentified or unresolved  
65 DRPs.<sup>1 2</sup> The pharmaceutical care concept, as one of the pillars of modern pharmacy services,  
66 assumes clinical interventions which lead to optimal health outcomes. Identification, prevention  
67 or resolution of DRPs improves patient's health outcomes, and therefore it should be integrated  
68 within pharmaceutical care.<sup>3 4</sup> However, community pharmacists must have the extensive clinical

1  
2  
3 69 knowledge and the sufficient training in order to identify and resolve DRPs. Therefore,  
4  
5 70 knowledge and training are important prerequisites to efficiently provide pharmaceutical care.<sup>5-9</sup>  
6  
7  
8  
9 71 In our previous study, it was suggested that the additional education of community pharmacists  
10  
11 72 in Croatia is associated with the higher level of clinical knowledge to detect and resolve DRPs ( $\beta$   
12  
13 73 = 0.272,  $P < 0.001$ ).<sup>10</sup> It was concluded that the additional education could increase the  
14  
15 74 community pharmacists' knowledge level and thus probably make pharmaceutical care  
16  
17 75 implementation more effective. Furthermore, using the same knowledge measurement tool, it  
18  
19 76 was found that community pharmacists from Australia compared to the colleagues from Croatia  
20  
21 77 seem to have a higher level of clinical knowledge to detect and resolve DRPs.<sup>11</sup> This finding  
22  
23 78 indicated a general need for the improvement in the knowledge level of community pharmacists  
24  
25 79 in Croatia. This was not an unexpected finding, since clinical pharmacy and pharmaceutical care  
26  
27 80 models are still in the initial stages of development in Croatia. Firstly, Centre for Applied  
28  
29 81 Pharmacy was established at the University of Zagreb Faculty of Pharmacy and Biochemistry in  
30  
31 82 2004. Afterwards, clinical pharmacy was the first subject to be introduced to the revised  
32  
33 83 pharmacy curricula. Patient-oriented subjects such as pharmacotherapy, communication skills,  
34  
35 84 pharmacy practice and pharmaceutical care were introduced between 2006 and 2009.<sup>12</sup> At that  
36  
37 85 time, University of Zagreb Faculty of Pharmacy and Biochemistry was the only faculty for  
38  
39 86 education of pharmacists in Croatia. Consequently, the majority of today's practicing community  
40  
41 87 pharmacists did not attend courses on these disciplines as a part of their graduate education due  
42  
43 88 to the unavailability of such courses. Furthermore, the most of available education for licensed  
44  
45 89 community pharmacists was aimed at promoting the products and consequently was without  
46  
47 90 significant benefits to pharmacists' knowledge about DRPs.

1  
2  
3 91 Previously, Mestrovic et al. also identified that community pharmacists in Croatia lack skills in  
4  
5 92 the areas of monitoring drug therapy, patient consultation and the evaluation of outcomes, and  
6  
7 93 that they believe they need to complete supplemental educational programs to be able to  
8  
9  
10 94 efficiently provide pharmaceutical care.<sup>13</sup>  
11  
12

13 95 Therefore, there seems to be a need for an additional education programs that could fill the gap  
14  
15 96 in community pharmacists' knowledge about DRPs, and presumably improve patients' health  
16  
17 97 outcomes. Highly interactive and multifaceted learning methods, such as workshops are reported  
18  
19 98 to be highly effective strategies to improve knowledge, professional practice and healthcare  
20  
21 99 outcomes.<sup>14-17</sup> Furthermore, continuing education programs in the form of an educational  
22  
23 100 workshop have shown to improve community pharmacists' knowledge and clinical skills in  
24  
25 101 practice.<sup>5 12 18-20</sup> Hence, we planned an educational intervention in the form of a workshop with  
26  
27 102 the goal of improving the clinical knowledge level of community pharmacists in Croatia.  
28  
29  
30  
31

## 32 33 103 **Methods**

34  
35 104

### 36 37 105 **Workshop setting**

38  
39  
40  
41 106 A three-day clinical pharmacy workshop for community pharmacists in Croatia was organized.  
42  
43 107 Workshop was advertised nationwide, with the help of Croatian Chamber of Pharmacists and  
44  
45 108 Croatian Pharmaceutical Society. Participation was voluntary and community pharmacists from  
46  
47 109 all over Croatia participated. The workshop lasted for a total of 20 hours, and during that time  
48  
49 110 various topics in the area of clinical pharmacy and pharmacotherapy were discussed, as shown in  
50  
51 111 Table 1.  
52  
53  
54  
55  
56  
57  
58  
59  
60

112 Table 1. Curriculum of the workshop

| Topic                                                 | Number of<br>teaching<br>hours | Main teaching method  |
|-------------------------------------------------------|--------------------------------|-----------------------|
| Pharmaceutical care in practice                       | 1                              | Formal lectures       |
| Rational pharmacotherapy and drug-related<br>problems | 1                              | Formal lectures       |
| Clinical pharmacy and evidence-based<br>medicine      | 1                              | Formal lectures       |
| Routine laboratory tests                              | 1.5                            | Clinical case solving |
| Food and drug interactions                            | 1                              | Clinical case solving |
| Pharmacokinetic and pharmacodynamic<br>interactions   | 1                              | Clinical case solving |
| Hormone therapy                                       | 1.5                            | Clinical case solving |
| Psychotropic drugs and antidepressants                | 1.5                            | Clinical case solving |
| Antimicrobial drugs                                   | 1.5                            | Clinical case solving |
| Rare diseases                                         | 1.5                            | Clinical case solving |
| Hypertension and anticoagulants                       | 1                              | Clinical case solving |
| Dyslipidemia and diabetes                             | 1                              | Clinical case solving |
| Narrow therapeutic index drugs                        | 1.5                            | Clinical case solving |
| Medication errors                                     | 2                              | Clinical case solving |
| Priority assessment in pharmacotherapy                | 2                              | Clinical case solving |

1  
2  
3 113 The workshop was held in a lecture hall at University of Split School of Medicine with the help  
4  
5 114 of assistants and pharmacy students. They supervised all participants during the workshop, and  
6  
7 115 participants who did not attend all sessions were considered to have dropped out from the study.  
8  
9  
10 116 A pharmacist and a pharmacologist were trainers who prepared and presented workshop  
11  
12 117 materials and discussions. Both trainers have appropriate education and qualifications, for  
13  
14 118 example the pharmacist is a competency development manager and lecturer of pharmaceutical  
15  
16 119 care with a PhD and ambulatory care specialization from American College of Clinical  
17  
18 120 Pharmacy and the pharmacologist is a professor of pharmacology and clinical pharmacy at  
19  
20 121 University of Split School of Medicine. Furthermore, key elements of an effective educational  
21  
22 122 activity, like formal lectures and interactive clinical case solving and exercises, were  
23  
24 123 incorporated into the program. The workshop was designed to provide a brief overview about  
25  
26 124 each topic, but then clinical cases were solved and discussed for the most of the workshop time.  
27  
28  
29 125 Cases were prepared according to the clinical case models available in the literature.<sup>21 22</sup> By  
30  
31 126 lifting the letter card, each participant had to answer for which of the 4 statements in each case  
32  
33 127 he thought was the most correct. After all participants had revealed their answers, discussion on  
34  
35 128 each statement followed. Participants were also invited to present a few of their own cases from  
36  
37 129 routine practice. From 150 clinical cases, one of the most important learning objectives was  
38  
39 130 increasing the knowledge through the identification and resolution of DRPs in the presented  
40  
41 131 cases. Other learning objectives included developing skill of decision-making process in routine  
42  
43 132 practice, priority assessment in pharmacotherapy and general introduction to the concept of  
44  
45 133 pharmaceutical care.  
46  
47  
48  
49  
50  
51  
52

### 53 134 **Evaluation of the workshop effectiveness**

54  
55  
56  
57  
58  
59  
60

1  
2  
3 135 In order to assess the level of the clinical knowledge of participating community pharmacists  
4  
5 136 pre- and post-workshop, we used a validated survey-based clinical knowledge measurement tool  
6  
7 137 developed by Williams et al.<sup>11</sup> ('supplementary file Survey') Also, the same tool was used in a  
8  
9 138 cross-sectional study with the aim of determining the clinical knowledge level of community  
10  
11 139 pharmacists in Croatia to identify, evaluate and resolve DRPs, as it was previously reported.<sup>10</sup>  
12  
13  
14 140 The survey was structured on nine clinical cases with a total of 40 statements. Clinical cases  
15  
16 141 were based on scenarios that were found to occur frequently in community pharmacies in  
17  
18 142 Australia. Each clinical case was supposed to assess a pharmacist's ability to identify, resolve  
19  
20 143 and evaluate a DRP. The survey was composed in a manner that all participants were asked to  
21  
22 144 read short case scenarios and select how relevant, likely or appropriate they found each of the  
23  
24 145 proposed statements using a seven-point Likert scale. In the first three clinical cases each  
25  
26 146 statement was about additional information that would be relevant to acquire for that case, while  
27  
28 147 the next three cases consisted of statements which described potential DRPs in each case and the  
29  
30 148 final three cases consisted of statements about possible recommendations for the patients. Since  
31  
32 149 the clinical cases were supposed to assess pharmacists' ability to manage DRPs, the type of  
33  
34 150 knowledge that was measured is mostly procedural knowledge, as it includes decision making  
35  
36 151 and problem solving in routine practice. However, to be able effectively perform these  
37  
38 152 procedures in practice, pharmacists' procedural knowledge must be based on extensive  
39  
40 153 declarative knowledge.

41  
42 154 All participating community pharmacists were invited on-site to independently complete the  
43  
44 155 survey twice: at the beginning of the workshop and three days later at the end of the last session  
45  
46 156 of the workshop. Participating pharmacists were supervised to complete the survey  
47  
48 157 independently and without access to additional resources or literature. The survey was

1  
2  
3 158 anonymous, providing only the participant's age, gender and a simple code to match the  
4  
5 159 participants' results before and after the workshop. Study size calculation was not applicable  
6  
7 160 because survey score difference which is associated with significant changes in routine practice  
8  
9  
10 161 is still not known. Therefore, all participating pharmacists were included in this study, except  
11  
12 162 pharmacists who participated in the previous nationwide cross-sectional study, which was the  
13  
14 163 only exclusion criteria.<sup>10</sup>  
15  
16  
17

### 18 164 **Data collection and statistical analysis**

19  
20

21 165 Afterwards, all data were collected in a Microsoft Excel® worksheet (version 15, Redmond,  
22  
23 166 WA, USA) and each completed survey was evaluated and scored. ('supplementary file Dataset')  
24  
25  
26 167 All statements were scored individually and each statement received a score of 2, 1 or 0  
27  
28 168 depending how far away the answer was from the correct answer. The lowest possible total score  
29  
30 169 was 0 and the maximum possible 80. A higher score indicates a higher level of clinical  
31  
32  
33 170 knowledge to detect, evaluate and resolve DRPs, as previously described.<sup>11</sup>  
34  
35

36  
37 171 Statistical calculations and analyses of the data were performed using the IBM SPSS ® statistical  
38  
39 172 package (version 20, Armonk, NY, USA). The graphical figure was prepared with the GraphPad  
40  
41 173 Prism software (version 6, La Jolla, CA, USA). Mean scores of the study participants were  
42  
43 174 analyzed with the independent samples and paired samples *t*-test. Normality of data was checked  
44  
45  
46 175 with the Kolmogorov-Smirnov and the Shapiro-Wilk tests. Pearson's correlation was used to  
47  
48 176 correlate pharmacist's score with age. For all tests, a  $P < 0.05$  was considered to be statistically  
49  
50 177 significant. All values are presented as mean  $\pm$  SD.  
51  
52

### 53 54 178 **Aim of the study**

55  
56  
57  
58  
59  
60



1  
2  
3 179 The aim of this study was to increase the knowledge level of community pharmacists in Croatia  
4  
5 180 to identify and resolve DRPs. Primary research outcome was the change of the community  
6  
7  
8 181 pharmacists' knowledge based on pre- and post-workshop evaluation. In addition, age and  
9  
10 182 gender subgroup analysis was performed.

### 13 183 **Ethics Committee approval**

14  
15  
16  
17 184 This study was approved by the University of Split School of Medicine Ethics Committee (003-  
18  
19 185 08/15-03/0001) and each participant consented verbally to participate in the study, as approved  
20  
21 186 by the Ethics Committee. Verbal consent was considered to be appropriate because of the  
22  
23 187 favorable risk/benefit ratio for the participants. The intervention was educational and the  
24  
25 188 assessment tool was the written survey so there were no particular risks for the study  
26  
27 189 participants.

### 31 190 **Patient and public involvement**

32  
33  
34  
35 191 No patients were involved in the design, recruitment and conduct of the study. The study  
36  
37 192 participants voluntarily accepted to participate in this study, and they were familiarized with all  
38  
39 193 the risks and benefits. They accepted the possibility that results of the study could be published.

## 42 194 **Results**

43  
44  
45  
46 195 Overall, 115 community pharmacists attended the workshop, 9 were excluded due to having  
47  
48 196 previously completed the survey and in total 88 pharmacists completed the survey both times.  
49  
50 197 This represents about 4% of all community pharmacists in Croatia.<sup>23</sup> The response rate, as shown  
51  
52 198 in Table 2, was satisfactory because participation was voluntary and some participants dropped  
53  
54 199 out before the end of the workshop. Matching method with the simple code was effective, which

200 resulted in the successful matching of study participants for further data extraction and  
 201 evaluation.

202 Table 2. Demographics of the matched study participants

|                     | <b>Community<br/>pharmacists</b> |
|---------------------|----------------------------------|
| Age (mean $\pm$ SD) | 36.6 $\pm$ 9.2                   |
| Female (%)          | 90.9                             |
| Male (%)            | 9.1                              |
| Response rate (%)   | 76.5                             |

203 Participating pharmacists had a pre-workshop mean score of  $42.9 \pm 8.2$ , and post-workshop  
 204 mean score of  $49.1 \pm 8.0$ , as presented in Fig 1. The mean score difference of  $6.2 \pm 9.0$ , which  
 205 represents a 14.5% relative increase, was found to be significant with the paired samples *t*-test (*t*  
 206 = 6.488, *P* < 0.001).

207 Fig 1. Pre- and post- workshop survey scores of participating community pharmacists by age and  
 208 gender subgroups

209 (Figure 1)

210 Furthermore, male pharmacists had a pre-workshop mean score of  $42.6 \pm 4.2$ , while female  
 211 pharmacists had a pre-workshop mean score of  $42.9 \pm 8.5$ , with no significant difference  
 212 between the scores with the independent samples *t*-test (*t* = -0.09, *P* = 0.93). However, after the

1  
2  
3 213 workshop only female pharmacists significantly increased their mean score (paired samples *t*-  
4  
5 214 test,  $t = 6.744$ ,  $P < 0.001$ ), with the mean score difference of  $6.9 \pm 9.1$ .  
6  
7  
8  
9 215 Pharmacists in both age subgroups significantly increased their mean scores after the workshop  
10  
11 216 (paired samples *t*-test,  $t = 4.786$ ,  $t = 4.342$ ,  $P < 0.001$ ) with nearly the same improvement, as  
12  
13 217 presented in Fig 1. Interestingly, there was no significant difference in the survey scores between  
14  
15 218 age subgroups and we found no correlation between pharmacists' survey scores and their age  
16  
17 219 (Pearson's  $r = 0.009$ ,  $n = 88$ ,  $P = 0.933$ ).  
18  
19  
20  
21

## 220 **Discussion**

221 The intensive three-day educational workshop on clinical pharmacy seemed to significantly  
222 increase the clinical knowledge of community pharmacists in Croatia to detect and resolve  
223 DRPs. This finding implies that an intensive case-based educational intervention could  
224 potentially fill the gap in community pharmacists' knowledge about DRPs.  
225  
226 From similar studies, Currie et al. proved that the intensive educational program in  
227 pharmaceutical care skills and implementation of these skills in practice successfully increased  
228 the rate of identified DRPs.<sup>24</sup> They used the 40-hour training program in two parts with the focus  
229 on the improvement of problem-solving and communication skills. Their training program did  
230 not include clinical pharmacy topics and was solely focused on pharmaceutical care. In addition,  
231 Currie et al. evaluated the impact of an educational intervention directly on patients and found  
232 that education of pharmacists in pharmaceutical care improves patient outcomes through  
233 identification of DRPs. Kimberlin et al. reported that pharmacists who engaged in an educational  
234 intervention program more likely assessed DRPs than pharmacists without the educational  
intervention and this difference held in the 3-month follow-up period.<sup>25</sup> Their training program

1  
2  
3 235 included day-long workshop and home study using a training manual. Furthermore, they  
4  
5 236 evaluated the effectiveness of an intervention by interviewing the patients which indicates better  
6  
7 237 outcomes in routine pharmacy practice. In contrast to this study, results of Kimberlin et al. study  
8  
9 238 are based on elderly patients. Furthermore, recently Lalonde et al. demonstrated that having  
10  
11 239 provided community pharmacists with a short disease-specific training and essential clinical  
12  
13 240 information successfully increased pharmacists' knowledge and clinical skills as well as reduced  
14  
15 241 DRP frequency in community pharmacy practice.<sup>26</sup> Lalonde et al. used short 90-minute  
16  
17 242 interactive web based training program on use of medications in chronic kidney disease.  
18  
19 243 Pharmacists in their study completed self-administered questionnaire 12 months later, which  
20  
21 244 showed that pharmacists improved knowledge by 4.5% and clinical skills by 7.4%. Compared to  
22  
23 245 this study it is a smaller relative knowledge increase, however it is maintained a year after  
24  
25 246 educational intervention. According to the Obreli-Neto et al., the majority of continuing  
26  
27 247 education programs were reported to be effective based on the studies' outcome measures.<sup>27</sup> It is  
28  
29 248 therefore difficult to compare study results without standardization of outcome measures. Also,  
30  
31 249 studies with similar duration of training and evaluation of participants reported heterogeneous  
32  
33 250 relative knowledge increasement, that ranged from 19% to higher or even 5%, as satisfying.<sup>28 29</sup>  
34  
35  
36  
37  
38  
39  
40  
41 251 Interestingly, this study also implies that community pharmacists' age does not correlate with  
42  
43 252 their clinical knowledge of detecting and resolving DRPs, while Mestrovic et al. study in the  
44  
45 253 community pharmacy setting in Croatia revealed that the age of participants, presumably through  
46  
47 254 experience, improved competency for recognizing and identifying DRPs.<sup>12</sup> However, the two  
48  
49 255 studies used different tools to assess the pharmacist's ability to manage DRPs, and one study  
50  
51 256 primarily evaluated knowledge while the other study evaluated competency, which further  
52  
53  
54 257 involves skills and attitudes of participants. Competency is the ability of pharmacist to make  
55  
56  
57  
58  
59  
60

1  
2  
3 258 deliberate choices for handling situations and tasks in professional pharmacy practice by using  
4  
5 259 and integrating knowledge and personal values.<sup>30</sup> Assessment of attitudes, skills and personal  
6  
7  
8 260 values requires more sophisticated evaluation methods, for example direct observations and  
9  
10 261 objective structured clinical examinations. Therefore, it is possible that age of pharmacists  
11  
12 262 through experience in practice impacts mostly skills, attitudes and personal values of community  
13  
14 263 pharmacists. As opposed to, pharmacists' knowledge could stagnate over time, especially if it is  
15  
16  
17 264 not renewed with continuous educations. This could be the reason for the different findings  
18  
19 265 between the studies, but further research is required in order to clarify this difference.  
20  
21

22  
23 266 Furthermore, it was found that after the workshop only female pharmacists significantly  
24  
25 267 improved their clinical knowledge about DRPs, while male pharmacists retained the same level  
26  
27 268 of knowledge as before the workshop. This potentially could be due to a greater emphasis on  
28  
29 269 pharmaceutical care which as a topic could be more appealing to female pharmacists.<sup>31</sup> However,  
30  
31 270 it is also possible that a small number of male participants (n = 8) was not sufficient to show  
32  
33 271 statistical significance, and therefore this finding is questionable and should be further  
34  
35 272 investigated.  
36  
37  
38  
39

40 273 Surprisingly, even after the workshop the overall survey scores were also lower than the scores  
41  
42 274 from the original study in Australia.<sup>11</sup> Survey was based on clinical cases and DRPs which are  
43  
44 275 relevant in Australian community pharmacy setting. However, the same cases with the same  
45  
46 276 DRPs can be routinely found in Croatian community pharmacy practice, so this could not be the  
47  
48 277 reason for such a difference. As mentioned, this most probably arises from different educational  
49  
50 278 backgrounds and different role of community pharmacists in healthcare systems.<sup>10</sup> Community  
51  
52 279 pharmacists in Croatia are still mostly oriented on traditional pharmacy services like dispensing  
53  
54  
55  
56  
57  
58  
59  
60

1  
2  
3 280 and supplying of medicines, while additional services, which could expand their role as health  
4  
5 281 care providers, are not available in practice. It is only in the last few years that work has begun to  
6  
7 282 introduce advanced services, like medication review in pharmacy practice. Furthermore, pre-  
8  
9  
10 283 workshop survey scores were also lower than scores in previous nationwide study.<sup>10</sup> Given that  
11  
12 284 the participation was voluntary, it is very likely that pharmacists who believed that they lack  
13  
14 285 knowledge in this area have applied in greater numbers. Also, authors of the workshop expected  
15  
16 286 this since they knew about community pharmacists' general lack of knowledge about DRPs.  
17  
18  
19 287 Therefore, they decided to use the same survey to evaluate the effectiveness of educational  
20  
21 288 intervention.

22  
23  
24  
25 289 A major limitation of this study is the fact that post-workshop clinical knowledge scores were  
26  
27 290 evaluated only immediately after the workshop, so these results actually represent short term  
28  
29 291 knowledge gain and are therefore not reflective of any sustained improvement in knowledge.  
30  
31 292 However, patient benefits must be continuous and not limited to certain periods of time. As  
32  
33 293 expected, a majority of studies have also confirmed that training programs increase the  
34  
35 294 knowledge of pharmacists immediately after the educational intervention, and only a few studies  
36  
37 295 revealed that these improvements could be maintained for a year or even longer without any  
38  
39 296 further education.<sup>7 26</sup> Therefore, follow-up evaluations are needed and these results should be  
40  
41 297 supported by conducting a future survey to determine whether improvements were maintained  
42  
43 298 and to further evaluate the effectiveness of the educational intervention.

44  
45  
46  
47  
48  
49 299 Another limitation is the possibility of overestimating the results to the general community  
50  
51 300 pharmacist population since the workshop participation was only voluntary. It is therefore  
52  
53 301 possible that only more motivated and enthusiastic pharmacists attended and thus had a greater  
54  
55  
56  
57  
58  
59  
60

1  
2  
3 302 improvement in knowledge. It is also possible that any prior training of pharmacists could have  
4  
5 303 impacted the pharmacists' knowledge, although this was the first large scale educational  
6  
7 304 intervention with the goal of increasing knowledge about DRPs in Croatia. Since community  
8  
9  
10 305 pharmacists in Croatia have not previously received any training of this type and there were no  
11  
12 306 pharmacists who have completed postgraduate studies, this was probably not a limitation. Also,  
13  
14 307 since study participants were from all over the country and represent both the small privately-  
15  
16 308 owned pharmacies and the large pharmacy chains and participants gender distribution is  
17  
18  
19 309 representative of Croatian community pharmacists population, generalization of these results to  
20  
21 310 the community pharmacy setting is much more applicable.<sup>23</sup>  
22  
23  
24

25 311 Finally, this study once more confirms previously reported findings that educational  
26  
27 312 interventions through workshops are a useful tool to successfully improve pharmacists'  
28  
29 313 knowledge on various topics in pharmacy practice.<sup>7 19 32 33</sup> Educational interventions can play a  
30  
31 314 vital role in expanding basic pharmacy education and enhancing pharmaceutical care  
32  
33  
34 315 implementation, especially when insufficient training has been received during undergraduate or  
35  
36 316 graduate studies.<sup>23</sup> However, to evaluate the true relevance of these findings for community  
37  
38  
39 317 pharmacy practice, it is still necessary to find out if the increased clinical knowledge level of  
40  
41 318 community pharmacists will result in an increased level of clinical interventions about DRPs in  
42  
43 319 daily practice. For example, one of the clear indicators would be the number of reported adverse  
44  
45 320 drug reactions or documented clinical interventions in this group of pharmacists. If confirmed,  
46  
47 321 these findings could have an important implication for pharmacists' continuing education about  
48  
49 322 DRPs.  
50  
51  
52  
53

## 54 323 **Conclusions**

55  
56  
57  
58  
59  
60

1  
2  
3 324 The interactive and intensive educational intervention through the three-day clinical pharmacy  
4  
5 325 workshop seems to improve the community pharmacists' knowledge to identify, evaluate and  
6  
7 326 resolve DRPs in a simulated routine practice setting. Therefore, educational interventions could  
8  
9  
10 327 be a valuable tool to fill the gap in pharmacist's knowledge about DRP management. Further  
11  
12 328 studies are necessary in order to evaluate long-term knowledge maintenance and the impact of  
13  
14 329 these findings in community pharmacy practice.

## 18 330 **Acknowledgements**

20  
21  
22  
23 331 The authors are grateful to all participating community pharmacists for making this study  
24  
25 332 possible and to Shelly Pranic for proofreading this paper.

## 28 333 **Competing Interests**

30  
31  
32  
33 334 Lovre Zekan is employed by Split-Dalmatia County Pharmacy and Arijana Mestrovic is  
34  
35 335 employed by Pharmaexpert LLC. The authors further declare that they have no competing  
36  
37 336 interests.

## 41 337 **Funding**

43  
44  
45  
46 338 This research received no specific grant from any funding agency in the public, commercial or  
47  
48 339 not-for-profit sectors.

## 51 340 **Author Contributions**



1  
2  
3 341 DM was the leader of this research. LZ interpreted and analyzed the study data. LZ, AM and DM  
4  
5 342 participated in the workshop preparation. ASP, JB, DL and DR participated in conducting the  
6  
7  
8 343 survey. All authors participated in preparation and approved the final manuscript.  
9

## 11 344 **Data Availability Statement**

13  
14  
15  
16 345 All data relevant to the study are included in the article or uploaded as supplementary  
17  
18 346 information.  
19

20  
21  
22 347

## 25 348 **References**

- 26  
27 349 1. Westerlund T, Marklund B. Assessment of the clinical and economic outcomes of pharmacy  
28 350 interventions in drug-related problems. *J Clin Pharm Ther* 2009;**34**(3):319-27.  
29 351 2. Kovacevic SV, Miljkovic B, Culafic M, et al. Evaluation of drug-related problems in older  
30 352 polypharmacy primary care patients. *J Eval Clin Pract* 2017;**23**(4):860-65.  
31 353 3. Allemann SS, van Mil JW, Botermann L, et al. Pharmaceutical care: the PCNE definition  
32 354 2013. *Int J Clin Pharm* 2014;**36**(3):544-55.  
33 355 4. Cousins D, Kijlstra N, Walser S. Pharmaceutical Care – Policies and Practices for a Safer,  
34 356 More Responsible and Cost-effective Health System: European Directorate for the  
35 357 Quality of Medicines & HealthCare, EDQM, Council of Europe; 2012 [Available from:  
36 358 [https://www.edqm.eu/medias/fichiers/policies\\_and\\_practices\\_for\\_a\\_safer\\_more\\_responsibl.pdf](https://www.edqm.eu/medias/fichiers/policies_and_practices_for_a_safer_more_responsibl.pdf).  
37 359  
38 360 5. Mehra IV, Wuller CA. Evaluation of a Pilot Clinical Skills Workshop Series for Community  
39 361 Pharmacists. *Am J Pharm Educ* 1998;**62**.  
40 362 6. Bindoff I, Ling T, Bereznicki L, et al. A Computer Simulation of Community Pharmacy Practice  
41 363 for Educational Use. *Am J Pharm Educ* 2014;**78**(9):168.  
42 364 7. Bsheti IA, Armour CL, Reddel HK, et al. Long-term maintenance of pharmacists' inhaler  
43 365 technique demonstration skills. *Am J Pharm Educ* 2009;**73**(2):32.  
44 366 8. Westerlund T, Almarsdottir AB, Melander A. Factors influencing the detection rate of drug-  
45 367 related problems in community pharmacy. *Pharm World Sci* 1999;**21**(6):245-50.  
46 368 9. Lamsam GD, Kropff MA. Community pharmacists' assessments and recommendations for  
47 369 treatment in four case scenarios. *Ann Pharmacother* 1998;**32**(4):409-16.  
48 370 10. Zekan L, Mestrovic A, Seselja Perisin A, et al. Clinical knowledge of community pharmacists  
49 371 in Croatia for detecting drug-related problems. *Int J Clin Pharm* 2017;**39**(6):1171-74.  
50 372 11. Williams M, Peterson GM, Tenni PC, et al. A clinical knowledge measurement tool to assess  
51 373 the ability of community pharmacists to detect drug-related problems. *Int J Pharm Pract*  
52 374 2012;**20**(4):238-48.  
53  
54  
55  
56  
57  
58  
59  
60

12. Mestrovic A, Stanicic Z, Hadziabdic MO, et al. Individualized education and competency development of Croatian community pharmacists using the general level framework. *Am J Pharm Educ* 2012;**76**(2):23.
13. Mestrovic A, Stanicic Z, Hadziabdic MO, et al. Evaluation of Croatian community pharmacists' patient care competencies using the general level framework. *Am J Pharm Educ* 2011;**75**(2):36.
14. Roque F, Herdeiro MT, Soares S, et al. Educational interventions to improve prescription and dispensing of antibiotics: a systematic review. *BMC Public Health* 2014;**14**:1276.
15. Pagotto C, Varallo F, Mastroianni P. Impact of educational interventions on adverse drug events reporting. *Int J Technol Assess Health Care* 2013;**29**(4):410-7.
16. Bellolio MF, Stead LG. Evidence-based emergency medicine/systematic review abstract. Continuing education meetings and workshops: effects on professional practice and health care outcomes. *Ann Emerg Med* 2009;**53**(5):685-7.
17. Davis D, O'Brien MA, Freemantle N, et al. Impact of formal continuing medical education: do conferences, workshops, rounds, and other traditional continuing education activities change physician behavior or health care outcomes? *JAMA* 1999;**282**(9):867-74.
18. Villeneuve J, Lamarre D, Lussier MT, et al. Physician-pharmacist collaborative care for dyslipidemia patients: knowledge and skills of community pharmacists. *J Contin Educ Health Prof* 2009;**29**(4):201-8.
19. Abdel Shaheed C, Maher CG, Mak W, et al. The effects of educational interventions on pharmacists' knowledge, attitudes and beliefs towards low back pain. *Int J Clin Pharm* 2015;**37**(4):616-25.
20. Connolly M, Rutter V, Cardiff L. Evaluation of workshop-based peer review training to support pharmacist professional development. *Pharmacy Education* 2016;**16**(1):92 - 94.
21. Dhillon S, Raymond R. *Pharmacy case studies*. London: Pharmaceutical Press, 2009.
22. Dodds LJ. *Drugs in use : clinical case studies for pharmacists*. 4th ed. London ; Chicago: Pharmaceutical Press, 2010.
23. International Pharmaceutical Federation: Global Pharmacy Workforce and Migration Report, 2006. [Available from: <http://fip.org/files/fip/publications/PharmacyWorkforceMigration.pdf>.
24. Currie JD, Chrischilles EA, Kuehl AK, et al. Effect of a training program on community pharmacists' detection of and intervention in drug-related problems. *J Am Pharm Assoc (Wash)* 1997;**NS37**(2):182-91.
25. Kimberlin CL, Berardo DH, Pendergast JF, et al. Effects of an education program for community pharmacists on detecting drug-related problems in elderly patients. *Med Care* 1993;**31**(5):451-68.
26. Lalonde L, Quintana-Barcena P, Lord A, et al. Community Pharmacist Training-and-Communication Network and Drug-Related Problems in Patients With CKD: A Multicenter, Cluster-Randomized, Controlled Trial. *Am J Kidney Dis* 2017;**70**(3):386-96.
27. Obreli-Neto PR, Marques Dos Reis T, Guidoni CM, et al. A Systematic Review of the Effects of Continuing Education Programs on Providing Clinical Community Pharmacy Services. *Am J Pharm Educ* 2016;**80**(5):88.
28. Minh PD, Huong DT, Byrkit R, et al. Strengthening pharmacy practice in vietnam: findings of a training intervention study. *Trop Med Int Health* 2013;**18**(4):426-34.
29. Chiang YC, Lee CN, Lin YM, et al. Impact of a continuing education program on pharmacists' knowledge and attitudes toward asthma patient care. *Med Princ Pract* 2010;**19**(4):305-11.
30. Govaerts MJ. Educational competencies or education for professional competence? *Med Educ* 2008;**42**(3):234-6.

- 1  
2  
3 424 31. International Pharmaceutical Federation: Global Pharmacy Workforce Report, 2009.  
4 425 [Available from:  
5 426 [http://fip.org/files/fip/publications/2009\\_FIP\\_Global\\_Pharmacy\\_Workforce\\_Report.pdf](http://fip.org/files/fip/publications/2009_FIP_Global_Pharmacy_Workforce_Report.pdf).  
6 427 32. Elkalmi RM, Hassali MA, Ibrahim MIM. Impact of Educational Intervention for Improving  
7 428 Pharmacist Knowledge in Adverse Drug Reactions (ADR) Reporting: Experience from  
8 429 Malaysia. *Open Drug Saf J* 2011;**2**:47-53.  
9 430 33. Austin Z, Marini A, MacLeod Glover N, et al. Peer-mentoring workshop for continuous  
10 431 professional development. *Am J Pharm Educ* 2006;**70**(5):117.  
11 432  
12  
13 433  
14  
15  
16  
17  
18  
19  
20  
21  
22  
23  
24  
25  
26  
27  
28  
29  
30  
31  
32  
33  
34  
35  
36  
37  
38  
39  
40  
41  
42  
43  
44  
45  
46  
47  
48  
49  
50  
51  
52  
53  
54  
55  
56  
57  
58  
59  
60

For peer review only

1  
2  
3 434 (Figure 1 legend)  
4  
5  
6

7 435 All values are presented as mean  $\pm$  SD. Statistically significant differences between pre- and post-workshop scores  
8  
9 436 are marked with a \* symbol (paired samples t-test,  $P < 0.001$ ). Median age of the study participants is 36 years. The  
10  
11 437 number of participants in each subgroup is specified in parentheses ().  
12  
13

14 438  
15  
16  
17  
18  
19  
20  
21  
22  
23  
24  
25  
26  
27  
28  
29  
30  
31  
32  
33  
34  
35  
36  
37  
38  
39  
40  
41  
42  
43  
44  
45  
46  
47  
48  
49  
50  
51  
52  
53  
54  
55  
56  
57  
58  
59  
60

For peer review only

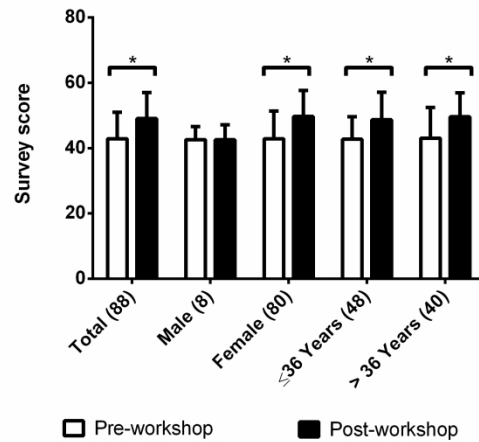

Fig 1. Pre- and post- workshop survey scores of participating community pharmacists by age and gender subgroups

All values are presented as mean  $\pm$  SD. Statistically significant differences between pre- and post-workshop scores are marked with a \* symbol (paired samples t-test,  $P < 0.001$ ). Median age of the study participants is 36 years. The number of participants in each subgroup is specified in parentheses ().

283x161mm (300 x 300 DPI)

# Clinical knowledge measurement tool about drug-related problems

Gender: (M) Male (F) Female Age (years): \_\_\_\_\_ Code: \_\_\_\_\_

**Instructions: Clinical cases 1 – 3.**  
 For each of the proposed statements, please indicate how relevant it is for each clinical case, by circling the appropriate number on 7-point scale (higher number indicates greater relevance).

**Clinical case 1**

A slightly overweight, 51-year-old female patient who regularly visits your pharmacy presents a prescription for perindopril 5 mg. The dispensing records indicate that the last antihypertensive agent prescribed for this patient was the perindopril/indapamide combination and it was last dispensed 3 months ago. Please indicate how relevant each piece of additional information would be in this case.

|                                                                                     | Totally irrelevant | Moderately irrelevant | Only slightly irrelevant | Neutral | Only slightly relevant | Moderately relevant | Very relevant |
|-------------------------------------------------------------------------------------|--------------------|-----------------------|--------------------------|---------|------------------------|---------------------|---------------|
| 1. Discuss with the patient whether the medication change was intentional.          | 1                  | 2                     | 3                        | 4       | 5                      | 6                   | 7             |
| 2. Discuss with the patient's doctor whether the medication change was intentional. | 1                  | 2                     | 3                        | 4       | 5                      | 6                   | 7             |
| 3. Discuss with the patient their compliance with the antihypertensive agent.       | 1                  | 2                     | 3                        | 4       | 5                      | 6                   | 7             |

**Clinical case 2**

A frail 80-year-old male patient presents to collect his last repeat from his glyceryl trinitrate (GTN) sublingual spray prescription. On dispensing, the pharmacist notices that this is the third time this medication has been dispensed in the last 2 weeks. Please indicate how relevant each piece of additional information would be in this case.

|                                                                                                   | Totally irrelevant | Moderately irrelevant | Only slightly irrelevant | Neutral | Only slightly relevant | Moderately relevant | Very relevant |
|---------------------------------------------------------------------------------------------------|--------------------|-----------------------|--------------------------|---------|------------------------|---------------------|---------------|
| 4. Determine if the pain the patient is feeling is actually due to angina.                        | 1                  | 2                     | 3                        | 4       | 5                      | 6                   | 7             |
| 5. Ask the patient to demonstrate his administration technique.                                   | 1                  | 2                     | 3                        | 4       | 5                      | 6                   | 7             |
| 6. Determine how long since the patient's general practitioner has reviewed his angina treatment. | 1                  | 2                     | 3                        | 4       | 5                      | 6                   | 7             |
| 7. Determine how efficacious the GTN spray is.                                                    | 1                  | 2                     | 3                        | 4       | 5                      | 6                   | 7             |

**Clinical case 3**

A 58 kg, 35-year-old woman presents to the pharmacy to collect a prescription for methotrexate 10 mg weekly from her rheumatologist, which is a new medication for her. Please indicate how relevant each piece of additional information would be in this case.

|                                                                                                                     | Totally irrelevant | Moderately irrelevant | Only slightly irrelevant | Neutral | Only slightly relevant | Moderately relevant | Very relevant |
|---------------------------------------------------------------------------------------------------------------------|--------------------|-----------------------|--------------------------|---------|------------------------|---------------------|---------------|
| 8. Determine if the patient has had baseline liver function tests.                                                  | 1                  | 2                     | 3                        | 4       | 5                      | 6                   | 7             |
| 9. Determine if the patient has had a negative pregnancy test and is currently taking/using adequate contraception. | 1                  | 2                     | 3                        | 4       | 5                      | 6                   | 7             |
| 10. Determine if the side effects of methotrexate have been explained to the patient.                               | 1                  | 2                     | 3                        | 4       | 5                      | 6                   | 7             |
| 11. Determine if the patient has been instructed to take folic acid.                                                | 1                  | 2                     | 3                        | 4       | 5                      | 6                   | 7             |
| 12. Determine how often the patient drinks alcohol.                                                                 | 1                  | 2                     | 3                        | 4       | 5                      | 6                   | 7             |

**Instructions: Clinical cases 4 – 6.**

For each of the proposed statements, please indicate how likely it is for each clinical case, by circling the appropriate number on 7-point scale (higher number indicates higher likelihood).

**Clinical case 4**

A 65 kg, 45-year-old female patient comes into the pharmacy to enquire about possible side effects. She was commenced on paroxetine 20 mg daily a few days ago and has been experiencing increasing anxiety (which is the reason the paroxetine was initially started), sweating and tachycardia. She has a medical history of atrial fibrillation and severe lower back pain, and is also taking digoxin, ramipril, tramadol and methadone. Please indicate how likely each drug-related problem would be in this case.

|                                                                                                                                            | Highly unlikely | Moderately unlikely | Only slightly unlikely | Neutral | Only slightly likely | Moderately likely | Highly likely |
|--------------------------------------------------------------------------------------------------------------------------------------------|-----------------|---------------------|------------------------|---------|----------------------|-------------------|---------------|
| 13. The commencement of the paroxetine may have resulted in an increase in anxiety for the patient.                                        | 1               | 2                   | 3                      | 4       | 5                    | 6                 | 7             |
| 14. This dose of paroxetine is unlikely to be controlling the patient's anxiety symptoms and an increase in her dose should be considered. | 1               | 2                   | 3                      | 4       | 5                    | 6                 | 7             |
| 15. The paroxetine may have interacted with the tramadol to cause the patient's symptoms.                                                  | 1               | 2                   | 3                      | 4       | 5                    | 6                 | 7             |
| 16. The paroxetine may have interacted with the digoxin to cause the patient's symptoms.                                                   | 1               | 2                   | 3                      | 4       | 5                    | 6                 | 7             |

**Clinical case 5**

A slightly overweight, 78 year-old female patient with a history of hypertension and mild heart failure presents with prescription for furosemide 20 mg daily to treat her swollen ankles. She is also currently taking lercanidipine 20 mg ramipril 2.5 mg daily, plus amitriptyline 10 mg nightly for sleep. Please indicate how likely each drug-related problem would be in this case.

|                                                                                                                    | Highly unlikely | Moderately unlikely | Only slightly unlikely | Neutral | Only slightly likely | Moderately likely | Highly likely |
|--------------------------------------------------------------------------------------------------------------------|-----------------|---------------------|------------------------|---------|----------------------|-------------------|---------------|
| 17. The patient's symptoms are likely to indicate a worsening of her heart failure.                                | 1               | 2                   | 3                      | 4       | 5                    | 6                 | 7             |
| 18. Lercanidipine could be causing peripheral edema.                                                               | 1               | 2                   | 3                      | 4       | 5                    | 6                 | 7             |
| 19. The swollen ankles may be due to an increased fluid intake resulting from hyperglycemia.                       | 1               | 2                   | 3                      | 4       | 5                    | 6                 | 7             |
| 20. The patient may have syndrome of inappropriate antidiuretic hormone secretion which has led to swollen ankles. | 1               | 2                   | 3                      | 4       | 5                    | 6                 | 7             |

**Clinical case 6**

A woman comes into the pharmacy to collect her elderly husband's prescriptions for him while he is recuperating at home. She states there is a new prescription for 'Imdur (isosorbide mononitrate) 60 mg in the morning' that was started in the hospital last week. The new medication doesn't seem to be working and her husband is still experiencing chest pain. The husband's history shows regular dispensing of pantoprazole 40 mg nightly, clopidogrel 75 mg in the morning, atorvastatin 20 mg nightly, Duride (isosorbide mononitrate) 60 mg nightly, perindopril 5 mg and tiotropium 18 µg in the morning and glyceril trinitrate spray p.r.n. Please indicate how likely each drug-related problem would be in this case.

|                                                                                                                                                                              | Highly unlikely | Moderately unlikely | Only slightly unlikely | Neutral | Only slightly likely | Moderately likely | Highly likely |
|------------------------------------------------------------------------------------------------------------------------------------------------------------------------------|-----------------|---------------------|------------------------|---------|----------------------|-------------------|---------------|
| 21. Her husband may be experiencing a decrease in symptom control for his chronic obstructive pulmonary disease and his shortness of breath is causing the chest pain.       | 1               | 2                   | 3                      | 4       | 5                    | 6                 | 7             |
| 22. Her husband may be experiencing nitrate tolerance if he has continued to take the Duride brand that he was initially prescribed, as well as the Imdur from the hospital. | 1               | 2                   | 3                      | 4       | 5                    | 6                 | 7             |
| 23. Her husband should have aspirin added to decrease his chest pain symptoms.                                                                                               | 1               | 2                   | 3                      | 4       | 5                    | 6                 | 7             |



1  
2  
3  
4  
5  
6  
7  
8  
9  
10  
11  
12  
13  
14  
15  
16  
17  
18  
19  
20  
21  
22  
23  
24  
25  
26  
27  
28  
29  
30  
31  
32  
33  
34  
35  
36  
37  
38  
39  
40  
41  
42  
43  
44  
45  
46  
47  
48  
49  
50  
51  
52  
53  
54  
55  
56  
57  
58  
59  
60**Instructions: Clinical cases 7 – 9.**

For each of the proposed statements, please indicate how appropriate it is for each clinical case, by circling the appropriate number on 7-point scale (higher number indicates higher appropriateness).

**Clinical case 7**

A slightly overweight, 70-year-old male patient is currently taking warfarin (dose is 5 mg/4 mg on alternate days). He has a dental prescription for an abscess for amoxicillin 500 mg three times a day and metronidazole 400 mg three times a day. Please indicate how appropriate each recommendation would be in this case.

|                                                                                                                                                         | Totally inappropriate | Moderately inappropriate | Only slightly inappropriate | Neutral | Only slightly appropriate | Moderately appropriate | Very appropriate |
|---------------------------------------------------------------------------------------------------------------------------------------------------------|-----------------------|--------------------------|-----------------------------|---------|---------------------------|------------------------|------------------|
| 24. Cease the warfarin while taking the antibiotics.                                                                                                    | 1                     | 2                        | 3                           | 4       | 5                         | 6                      | 7                |
| 25. Discuss the interaction with the patient and recommend an increase in international normalised ratio (INR) monitoring while taking the antibiotics. | 1                     | 2                        | 3                           | 4       | 5                         | 6                      | 7                |
| 26. Discuss the signs and symptoms of an increased INR with the patient.                                                                                | 1                     | 2                        | 3                           | 4       | 5                         | 6                      | 7                |
| 27. Recommend ibuprofen for pain relief for the dental abscess.                                                                                         | 1                     | 2                        | 3                           | 4       | 5                         | 6                      | 7                |
| 28. Halve the warfarin dose while taking the antibiotics.                                                                                               | 1                     | 2                        | 3                           | 4       | 5                         | 6                      | 7                |
| 29. Change the warfarin to aspirin while using the antibiotics.                                                                                         | 1                     | 2                        | 3                           | 4       | 5                         | 6                      | 7                |

**Clinical case 8**

A 65 year-old female with airways disease has a recent dispensing history containing Seretide 250/25 (two puffs twice a day and Ventolin inhaler (1–2 p.r.n.). She presents a 3-monthhold prescription to the pharmacist for prednisolone 25 mg, which reads '25 mg twice a day for three days, then 12.5 mg twice a day for three days'. On further discussion, the pharmacist determines that the patient is currently experiencing a worsening of the respiratory symptoms and is unsure what dose of prednisolone she should be taking. Please indicate how appropriate each recommendation would be in this case.

|                                                                                                                                       | Totally inappropriate | Moderately inappropriate | Only slightly inappropriate | Neutral | Only slightly appropriate | Moderately appropriate | Very appropriate |
|---------------------------------------------------------------------------------------------------------------------------------------|-----------------------|--------------------------|-----------------------------|---------|---------------------------|------------------------|------------------|
| 30. Advise the patient not to take the prednisolone 25 mg at all.                                                                     | 1                     | 2                        | 3                           | 4       | 5                         | 6                      | 7                |
| 31. Commence over-the-counter pantoprazole 20 mg daily to decrease the risk of gastrointestinal bleeds while taking the prednisolone. | 1                     | 2                        | 3                           | 4       | 5                         | 6                      | 7                |
| 32. Contact the patient's general practitioner and determine what prednisolone dose she should currently be taking.                   | 1                     | 2                        | 3                           | 4       | 5                         | 6                      | 7                |
| 33. Advise the patient to cease the Seretide while she is taking the prednisolone tablets.                                            | 1                     | 2                        | 3                           | 4       | 5                         | 6                      | 7                |
| 34. Advise the patient to increase the use of her Ventolin inhaler in preference to using the prednisolone.                           | 1                     | 2                        | 3                           | 4       | 5                         | 6                      | 7                |

1  
2  
3  
4  
5  
6  
7  
8  
9  
10  
11  
12  
13  
14  
15  
16  
17  
18  
19  
20  
21  
22  
23  
24  
25  
26  
27  
28  
29  
30  
31  
32  
33  
34  
35  
36  
37  
38  
39  
40  
41  
42  
43  
44  
45  
46  
47  
48  
49  
50  
51  
52  
53  
54  
55  
56  
57  
58  
59  
60**Clinical case 9**

120 kg, 40-year-old male smoker with osteoarthritis is taking esomeprazole 40 mg daily, but currently has no gastrointestinal symptoms. The only other medication he is currently taking is regular paracetamol for his osteoarthritis pain that he buys over the counter, and his dispensing history shows ketoprofen and cephalexin dispensed several months ago. Please indicate how appropriate each recommendation would be in this case.

|                                                                                                                          | Totally inappropriate | Moderately inappropriate | Only slightly inappropriate | Neutral | Only slightly appropriate | Moderately appropriate | Very appropriate |
|--------------------------------------------------------------------------------------------------------------------------|-----------------------|--------------------------|-----------------------------|---------|---------------------------|------------------------|------------------|
| 35. Recommend the patient return to the general practitioner to reduce his dose to 20 mg daily.                          | 1                     | 2                        | 3                           | 4       | 5                         | 6                      | 7                |
| 36. Recommend the patient return to the general practitioner to trial using esomeprazole on a p.r.n. basis.              | 1                     | 2                        | 3                           | 4       | 5                         | 6                      | 7                |
| 37. Discuss a weight management programme with the patient.                                                              | 1                     | 2                        | 3                           | 4       | 5                         | 6                      | 7                |
| 38. Discuss smoking cessation with the patient.                                                                          | 1                     | 2                        | 3                           | 4       | 5                         | 6                      | 7                |
| 39. Recommend the patient have his vitamin B12 levels checked.                                                           | 1                     | 2                        | 3                           | 4       | 5                         | 6                      | 7                |
| 40. Recommend the patient stop the regular paracetamol and change back to ketoprofen to control his osteoarthritis pain. | 1                     | 2                        | 3                           | 4       | 5                         | 6                      | 7                |

1-male  
2-female

CORRECT ANSWERS:

7 7 7 7 7 7 7 7 7 7 7 7 6 6 1 7 1 6 7 2 3 5 7 1 1 7 7 1 1 1 1 1 1 7 1 1 7 7 6 6

CLINICAL CASES - PARTICIPANTS' ANSWERS (PRE-WORKSHOP)

| N  | PAIRING CODE | GENDER | AGE (years) | Answers |   |   |   |   |   |   |   |   |    |    |    |    |    |    |    |    |    |    |    |    |    |    |    |    |    |    |    |    |    |    |    |    |    |    |    |    |    |   |   |   |   |   |
|----|--------------|--------|-------------|---------|---|---|---|---|---|---|---|---|----|----|----|----|----|----|----|----|----|----|----|----|----|----|----|----|----|----|----|----|----|----|----|----|----|----|----|----|----|---|---|---|---|---|
|    |              |        |             | 1       | 2 | 3 | 4 | 5 | 6 | 7 | 8 | 9 | 10 | 11 | 12 | 13 | 14 | 15 | 16 | 17 | 18 | 19 | 20 | 21 | 22 | 23 | 24 | 25 | 26 | 27 | 28 | 29 | 30 | 31 | 32 | 33 | 34 | 35 | 36 | 37 | 38 |   |   |   |   |   |
| 1  | IOB          | 2      | 33          | 6       | 4 | 7 | 3 | 4 | 7 | 6 | 4 | 7 | 7  | 7  | 7  | 7  | 5  | 14 | 3  | 6  | 6  | 7  | 5  | 2  | 7  | 7  | 1  | 5  | 7  | 7  | 1  | 6  | 5  | 7  | 4  | 1  | 1  | 1  | 3  | 5  | 7  | 7 | 6 | 6 |   |   |
| 2  | IOB          | 2      | 33          | 6       | 6 | 7 | 7 | 7 | 7 | 5 | 7 | 6 | 7  | 6  | 6  | 4  | 5  | 5  | 5  | 6  | 5  | 5  | 6  | 5  | 6  | 4  | 4  | 7  | 7  | 2  | 2  | 1  | 3  | 5  | 7  | 3  | 1  | 7  | 4  | 6  | 6  | 6 |   |   |   |   |
| 3  | ZIO          | 2      | 37          | 7       | 5 | 7 | 7 | 7 | 7 | 7 | 7 | 7 | 7  | 7  | 7  | 1  | 7  | 4  | 6  | 6  | 1  | 4  | 6  | 6  | 4  | 1  | 7  | 7  | 1  | 1  | 1  | 1  | 7  | 7  | 1  | 1  | 1  | 7  | 7  | 1  | 4  | 7 | 7 |   |   |   |
| 4  | MPS          | 2      | 29          | 7       | 6 | 2 | 6 | 7 | 6 | 4 | 5 | 7 | 2  | 4  | 1  | 5  | 5  | 3  | 3  | 5  | 5  | 3  | 4  | 5  | 6  | 4  | 5  | 7  | 7  | 7  | 6  | 4  | 2  | 6  | 7  | 2  | 1  | 6  | 4  | 7  | 7  | 7 |   |   |   |   |
| 5  | DO5          | 2      | 29          | 7       | 4 | 7 | 7 | 7 | 7 | 7 | 7 | 7 | 7  | 7  | 7  | 5  | 7  | 4  | 6  | 6  | 7  | 7  | 7  | 5  | 6  | 4  | 1  | 7  | 7  | 1  | 7  | 1  | 5  | 5  | 4  | 4  | 4  | 6  | 1  | 7  | 7  | 7 |   |   |   |   |
| 6  | MPM          | 2      | 29          | 7       | 5 | 5 | 7 | 7 | 7 | 7 | 7 | 7 | 7  | 7  | 7  | 6  | 6  | 5  | 4  | 6  | 6  | 6  | 6  | 6  | 6  | 4  | 7  | 7  | 1  | 5  | 4  | 5  | 5  | 5  | 3  | 3  | 5  | 5  | 7  | 7  | 7  | 7 |   |   |   |   |
| 7  | DPA          | 2      | 38          | 7       | 7 | 7 | 7 | 7 | 7 | 6 | 7 | 7 | 7  | 7  | 7  | 7  | 6  | 6  | 7  | 6  | 6  | 5  | 5  | 6  | 4  | 1  | 6  | 6  | 2  | 5  | 2  | 7  | 7  | 6  | 2  | 6  | 6  | 6  | 6  | 6  | 6  | 6 |   |   |   |   |
| 8  | BLM          | 2      | 27          | 3       | 7 | 7 | 7 | 7 | 7 | 1 | 7 | 7 | 7  | 7  | 7  | 7  | 3  | 3  | 2  | 2  | 6  | 4  | 1  | 4  | 7  | 1  | 1  | 6  | 7  | 1  | 1  | 1  | 6  | 4  | 7  | 4  | 1  | 5  | 7  | 7  | 7  | 7 |   |   |   |   |
| 9  | MDI          | 2      | 35          | 2       | 7 | 7 | 7 | 7 | 6 | 4 | 7 | 7 | 6  | 5  | 4  | 7  | 5  | 6  | 7  | 6  | 5  | 2  | 4  | 4  | 7  | 2  | 2  | 6  | 7  | 1  | 1  | 1  | 7  | 1  | 4  | 1  | 1  | 5  | 7  | 7  | 7  | 7 |   |   |   |   |
| 10 | SB8          | 2      | 34          | 2       | 7 | 7 | 7 | 7 | 5 | 2 | 7 | 5 | 3  | 3  | 6  | 5  | 6  | 7  | 7  | 6  | 5  | 6  | 6  | 5  | 6  | 4  | 3  | 5  | 3  | 2  | 2  | 7  | 1  | 1  | 1  | 1  | 6  | 6  | 7  | 7  | 7  |   |   |   |   |   |
| 11 | JPB          | 2      | 38          | 7       | 7 | 6 | 7 | 7 | 7 | 4 | 5 | 7 | 6  | 6  | 6  | 7  | 4  | 6  | 7  | 6  | 6  | 3  | 5  | 5  | 5  | 1  | 2  | 6  | 6  | 1  | 1  | 2  | 2  | 7  | 1  | 7  | 3  | 6  | 7  | 7  | 7  | 7 |   |   |   |   |
| 12 | UB           | 2      | 38          | 6       | 6 | 5 | 7 | 7 | 7 | 4 | 5 | 7 | 7  | 6  | 6  | 6  | 6  | 6  | 6  | 7  | 5  | 6  | 6  | 6  | 6  | 6  | 7  | 5  | 7  | 7  | 7  | 6  | 1  | 7  | 7  | 2  | 1  | 4  | 2  | 7  | 7  | 7 |   |   |   |   |
| 13 | ALV          | 2      | 29          | 5       | 7 | 7 | 6 | 7 | 7 | 4 | 6 | 7 | 7  | 7  | 7  | 3  | 3  | 7  | 2  | 6  | 4  | 4  | 5  | 5  | 2  | 1  | 7  | 2  | 1  | 1  | 7  | 7  | 3  | 1  | 1  | 1  | 7  | 7  | 3  | 1  | 5  | 2 | 7 | 7 |   |   |
| 14 | BGV          | 2      | 39          | 7       | 7 | 7 | 7 | 7 | 7 | 7 | 7 | 7 | 6  | 7  | 6  | 7  | 5  | 1  | 6  | 6  | 6  | 6  | 4  | 4  | 1  | 7  | 4  | 5  | 7  | 7  | 1  | 5  | 2  | 5  | 6  | 7  | 7  | 1  | 1  | 6  | 6  | 5 | 5 |   |   |   |
| 15 | VJM          | 2      | 35          | 7       | 5 | 6 | 7 | 7 | 6 | 4 | 5 | 7 | 7  | 7  | 6  | 4  | 2  | 3  | 5  | 6  | 3  | 6  | 4  | 7  | 4  | 1  | 1  | 1  | 7  | 1  | 2  | 1  | 1  | 7  | 6  | 2  | 2  | 2  | 7  | 6  | 6  | 6 | 6 |   |   |   |
| 16 | JMB          | 2      | 34          | 7       | 7 | 7 | 7 | 7 | 7 | 7 | 7 | 7 | 7  | 7  | 7  | 7  | 2  | 2  | 5  | 5  | 6  | 7  | 2  | 2  | 2  | 6  | 6  | 1  | 1  | 7  | 7  | 2  | 5  | 1  | 4  | 6  | 6  | 2  | 2  | 7  | 2  | 7 | 7 |   |   |   |
| 17 | ZCZ          | 1      | 28          | 6       | 5 | 7 | 7 | 7 | 7 | 7 | 5 | 7 | 7  | 5  | 5  | 6  | 2  | 6  | 6  | 4  | 6  | 5  | 3  | 6  | 6  | 2  | 2  | 7  | 7  | 1  | 6  | 4  | 6  | 3  | 7  | 3  | 2  | 5  | 4  | 6  | 6  | 6 | 6 |   |   |   |
| 18 | RBA          | 2      | 39          | 6       | 6 | 6 | 6 | 7 | 7 | 6 | 7 | 7 | 7  | 6  | 6  | 6  | 7  | 7  | 6  | 5  | 3  | 4  | 4  | 7  | 1  | 3  | 7  | 7  | 1  | 5  | 3  | 5  | 7  | 1  | 1  | 5  | 6  | 6  | 6  | 6  | 6  | 6 | 6 |   |   |   |
| 19 | KMP          | 2      | 35          | 2       | 6 | 6 | 6 | 7 | 6 | 2 | 7 | 7 | 6  | 5  | 6  | 7  | 3  | 5  | 6  | 6  | 2  | 2  | 2  | 5  | 4  | 3  | 6  | 7  | 7  | 3  | 4  | 4  | 2  | 5  | 7  | 3  | 4  | 7  | 6  | 6  | 6  | 6 | 6 |   |   |   |
| 20 | SUJ          | 2      | 54          | 6       | 5 | 6 | 7 | 6 | 4 | 4 | 5 | 4 | 5  | 4  | 2  | 5  | 2  | 2  | 6  | 6  | 5  | 5  | 2  | 1  | 7  | 1  | 6  | 7  | 5  | 1  | 4  | 5  | 7  | 2  | 5  | 7  | 2  | 5  | 6  | 3  | 6  | 6 | 6 |   |   |   |
| 21 | LKB          | 2      | 52          | 6       | 4 | 7 | 6 | 7 | 7 | 4 | 5 | 7 | 7  | 7  | 7  | 7  | 1  | 2  | 6  | 5  | 6  | 2  | 3  | 3  | 5  | 6  | 5  | 3  | 7  | 7  | 3  | 2  | 1  | 2  | 3  | 7  | 6  | 2  | 6  | 3  | 7  | 7 | 7 |   |   |   |
| 22 | DRM          | 2      | 37          | 6       | 5 | 4 | 6 | 6 | 6 | 6 | 5 | 5 | 5  | 5  | 6  | 5  | 6  | 5  | 6  | 5  | 6  | 5  | 6  | 5  | 4  | 6  | 6  | 6  | 4  | 6  | 5  | 5  | 5  | 5  | 5  | 5  | 5  | 5  | 5  | 5  | 5  | 5 | 6 | 6 |   |   |
| 23 | ADJ          | 2      | 35          | 5       | 6 | 7 | 7 | 7 | 7 | 7 | 7 | 7 | 7  | 7  | 7  | 7  | 7  | 7  | 7  | 7  | 7  | 7  | 7  | 7  | 7  | 7  | 7  | 7  | 7  | 7  | 7  | 7  | 7  | 7  | 7  | 7  | 7  | 7  | 7  | 7  | 7  | 7 | 7 | 7 |   |   |
| 24 | VNZ          | 2      | 36          | 6       | 4 | 7 | 3 | 7 | 5 | 4 | 6 | 7 | 7  | 7  | 7  | 5  | 11 | 4  | 6  | 6  | 6  | 6  | 6  | 4  | 1  | 7  | 7  | 1  | 5  | 7  | 7  | 1  | 6  | 5  | 7  | 2  | 1  | 1  | 1  | 5  | 5  | 6 | 6 | 6 |   |   |
| 25 | ZPS          | 1      | 33          | 7       | 6 | 6 | 6 | 6 | 6 | 7 | 6 | 6 | 7  | 4  | 7  | 7  | 5  | 1  | 4  | 5  | 6  | 6  | 5  | 4  | 6  | 5  | 6  | 1  | 7  | 5  | 1  | 2  | 1  | 1  | 6  | 6  | 1  | 1  | 6  | 6  | 6  | 6 | 6 | 6 |   |   |
| 26 | KGI          | 2      | 28          | 7       | 6 | 7 | 7 | 6 | 7 | 6 | 6 | 6 | 7  | 6  | 6  | 5  | 7  | 6  | 6  | 6  | 6  | 6  | 6  | 4  | 6  | 7  | 4  | 1  | 6  | 6  | 3  | 1  | 1  | 6  | 4  | 7  | 1  | 1  | 5  | 5  | 6  | 6 | 6 | 6 |   |   |
| 27 | DUR          | 2      | 52          | 7       | 7 | 5 | 7 | 7 | 7 | 1 | 4 | 7 | 7  | 7  | 1  | 1  | 7  | 1  | 1  | 3  | 4  | 1  | 4  | 7  | 1  | 1  | 6  | 4  | 1  | 1  | 1  | 1  | 1  | 7  | 7  | 7  | 1  | 1  | 7  | 1  | 7  | 7 | 7 | 7 |   |   |
| 28 | DMM          | 2      | 53          | 6       | 6 | 6 | 6 | 7 | 6 | 7 | 6 | 6 | 6  | 6  | 6  | 7  | 5  | 6  | 6  | 6  | 5  | 7  | 4  | 4  | 6  | 4  | 2  | 7  | 7  | 1  | 1  | 1  | 7  | 7  | 1  | 7  | 1  | 7  | 1  | 4  | 4  | 5 | 7 | 7 |   |   |
| 29 | ZPT          | 2      | 45          | 7       | 7 | 7 | 7 | 7 | 7 | 7 | 7 | 7 | 7  | 7  | 7  | 7  | 7  | 7  | 7  | 7  | 7  | 7  | 7  | 7  | 7  | 7  | 7  | 7  | 7  | 7  | 7  | 7  | 7  | 7  | 7  | 7  | 7  | 7  | 7  | 7  | 7  | 7 | 7 | 7 |   |   |
| 30 | AGB          | 2      | 37          | 7       | 4 | 7 | 6 | 7 | 7 | 1 | 6 | 7 | 5  | 5  | 6  | 1  | 4  | 7  | 4  | 7  | 4  | 7  | 5  | 2  | 5  | 3  | 2  | 7  | 7  | 1  | 2  | 1  | 4  | 4  | 7  | 3  | 2  | 5  | 5  | 7  | 7  | 7 | 7 | 7 |   |   |
| 31 | MKJ          | 2      | 58          | 7       | 3 | 6 | 7 | 7 | 7 | 1 | 5 | 7 | 6  | 6  | 4  | 6  | 1  | 6  | 4  | 6  | 7  | 1  | 6  | 5  | 1  | 1  | 4  | 4  | 1  | 1  | 1  | 1  | 7  | 1  | 7  | 1  | 1  | 1  | 1  | 5  | 1  | 4 | 4 | 7 | 7 |   |
| 32 | CBB          | 2      | 26          | 6       | 6 | 7 | 7 | 7 | 4 | 4 | 4 | 4 | 5  | 7  | 6  | 4  | 7  | 3  | 4  | 5  | 3  | 5  | 4  | 4  | 5  | 5  | 6  | 4  | 3  | 7  | 7  | 1  | 5  | 3  | 4  | 5  | 5  | 1  | 1  | 2  | 5  | 5 | 5 | 5 | 5 |   |
| 33 | LET          | 2      | 30          | 6       | 6 | 6 | 7 | 7 | 7 | 5 | 6 | 7 | 5  | 6  | 6  | 6  | 6  | 6  | 6  | 6  | 6  | 6  | 5  | 5  | 6  | 6  | 3  | 6  | 6  | 1  | 3  | 1  | 4  | 6  | 5  | 5  | 4  | 5  | 4  | 6  | 6  | 6 | 6 | 6 |   |   |
| 34 | ASZ          | 2      | 32          | 6       | 7 | 7 | 7 | 7 | 7 | 7 | 7 | 7 | 7  | 7  | 7  | 7  | 7  | 7  | 7  | 7  | 7  | 7  | 7  | 7  | 7  | 7  | 7  | 7  | 7  | 7  | 7  | 7  | 7  | 7  | 7  | 7  | 7  | 7  | 7  | 7  | 7  | 7 | 7 | 7 |   |   |
| 35 | MMN          | 2      | 29          | 7       | 5 | 4 | 7 | 7 | 4 | 3 | 3 | 4 | 6  | 5  | 5  | 6  | 2  | 5  | 7  | 5  | 6  | 4  | 3  | 6  | 7  | 4  | 4  | 6  | 6  | 3  | 4  | 4  | 4  | 5  | 7  | 4  | 4  | 5  | 7  | 4  | 4  | 6 | 7 | 5 | 6 | 6 |
| 36 | SMA          | 2      | 52          | 5       | 5 | 5 | 7 | 6 | 6 | 7 | 6 | 7 | 7  | 7  | 7  | 7  | 7  | 6  | 6  | 3  | 5  | 1  | 1  | 7  | 1  | 1  | 1  | 7  | 7  | 1  | 1  | 1  | 5  | 5  | 7  | 7  | 1  | 4  | 4  | 4  | 4  | 4 | 4 | 7 | 7 |   |
| 37 | IRD          | 2      | 53          | 7       | 6 | 6 | 7 | 7 | 6 | 2 | 7 | 4 | 5  | 7  | 7  | 6  | 4  | 4  | 6  | 7  | 5  | 4  | 4  | 6  | 7  | 4  | 1  | 7  | 7  | 4  | 4  | 1  | 1  | 7  | 7  | 1  | 1  | 7  | 7  | 1  | 1  | 7 | 1 | 6 | 7 |   |
| 38 | IAN          | 2      | 41          | 7       | 6 | 6 | 7 | 7 | 7 | 7 | 7 | 7 | 7  | 7  | 7  | 6  | 2  | 2  | 6  | 6  | 6  | 6  | 2  | 6  | 6  | 1  | 7  | 7  | 1  | 1  | 1  | 7  | 7  | 1  | 1  | 1  | 7  | 7  | 1  | 1  | 1  | 1 | 7 | 7 |   |   |
| 39 | WAN          | 2      | 28          | 6       | 6 | 7 | 7 | 7 | 7 | 7 | 7 | 7 | 7  | 7  | 7  | 7  | 7  | 7  | 7  | 7  | 7  | 7  | 7  | 7  | 7  | 7  | 7  | 7  | 7  | 7  | 7  | 7  | 7  | 7  | 7  | 7  | 7  | 7  | 7  | 7  | 7  | 7 | 7 | 7 |   |   |
| 40 | ADL          | 2      | 46          | 7       | 4 | 7 | 7 | 7 | 7 | 4 | 7 | 7 | 7  | 7  | 7  | 7  | 4  | 4  | 4  | 7  | 4  | 7  | 4  | 4  | 4  | 4  | 4  | 4  | 4  | 4  | 4  | 4  | 4  | 4  | 4  | 4  | 4  | 4  | 4  | 4  | 4  | 4 | 4 | 4 | 4 | 4 |
| 41 | TTL          | 2      | 36          | 3       | 4 | 3 | 4 | 4 | 3 | 3 | 5 | 7 | 7  | 7  | 6  | 4  | 2  | 3  | 5  | 6  | 3  | 6  | 4  | 7  | 4  | 4  | 1  | 1  | 1  | 7  | 1  | 2  | 1  | 1  | 7  | 6  | 2  | 2  | 2  | 7  | 6  | 6 | 6 | 6 |   |   |
| 42 | RPB          | 2      | 42          | 1       | 7 | 5 | 4 | 7 | 5 | 7 | 6 | 5 | 7  | 7  | 7  | 5  | 4  | 5  | 4  | 5  | 4  | 7  | 3  | 4  | 3  | 6  | 4  | 7  | 5  | 3  | 7  | 1  | 4  | 1  | 4  | 4  | 7  | 4  | 7  | 4  | 7  | 4 | 7 | 7 | 7 |   |
| 43 | APV          | 2      | 41          | 7       | 7 | 5 | 4 | 7 | 6 | 4 | 5 | 6 | 6  | 6  | 6  | 5  | 4  | 4  | 6  | 5  | 4  | 3  | 7  | 5  | 7  |    |    |    |    |    |    |    |    |    |    |    |    |    |    |    |    |   |   |   |   |   |



1  
2  
3  
4  
5  
6  
7  
8  
9  
10  
11  
12  
13  
14  
15  
16  
17  
18  
19  
20  
21  
22  
23  
24  
25  
26  
27  
28  
29  
30  
31  
32  
33  
34  
35  
36  
37  
38  
39  
40  
41  
42  
43  
44  
45  
46

**SURVEY SCORE (PRE)**

|    |
|----|
| 45 |
| 39 |
| 45 |
| 58 |
| 31 |
| 42 |
| 36 |
| 44 |
| 52 |
| 45 |
| 35 |
| 45 |
| 36 |
| 46 |
| 52 |
| 44 |
| 53 |
| 42 |
| 53 |
| 38 |
| 26 |
| 44 |
| 23 |
| 45 |
| 35 |
| 46 |
| 50 |
| 48 |
| 50 |
| 42 |
| 39 |
| 47 |
| 29 |
| 33 |
| 55 |
| 29 |
| 39 |
| 45 |
| 59 |
| 49 |
| 38 |
| 36 |
| 35 |
| 27 |
| 52 |
| 44 |
| 45 |
| 39 |
| 45 |
| 44 |
| 48 |
| 44 |
| 36 |
| 36 |
| 46 |
| 29 |
| 48 |
| 56 |
| 45 |
| 44 |
| 40 |
| 48 |
| 50 |
| 43 |
| 35 |
| 42 |
| 41 |
| 50 |
| 53 |
| 61 |
| 23 |
| 46 |
| 41 |
| 43 |
| 37 |
| 35 |
| 49 |
| 48 |
| 54 |
| 30 |
| 30 |
| 39 |
| 40 |
| 41 |
| 45 |
| 43 |

**CLINICAL CASES - PARTICIPANTS' ANSWERS (POST-WORKSHOP)**

| 1 | 2 | 3 | 4 | 5 | 6 | 7 | 8 | 9 | 10 | 11 | 12 | 13 | 14 | 15 | 16 | 17 | 18 | 19 | 20 | 21 | 22 | 23 | 24 | 25 | 26 | 27 | 28 | 29 | 30 | 31 | 32 | 33 | 34 | 35 | 36 | 37 | 38 |   |   |   |
|---|---|---|---|---|---|---|---|---|----|----|----|----|----|----|----|----|----|----|----|----|----|----|----|----|----|----|----|----|----|----|----|----|----|----|----|----|----|---|---|---|
| 7 | 6 | 7 | 7 | 7 | 6 | 6 | 7 | 7 | 7  | 7  | 6  | 1  | 7  | 4  | 7  | 7  | 1  | 5  | 7  | 7  | 3  | 1  | 7  | 7  | 3  | 2  | 2  | 7  | 6  | 7  | 1  | 4  | 2  | 3  | 7  | 7  |    |   |   |   |
| 7 | 6 | 7 | 7 | 7 | 7 | 7 | 7 | 7 | 7  | 7  | 7  | 7  | 1  | 7  | 5  | 6  | 7  | 5  | 5  | 7  | 7  | 1  | 1  | 7  | 7  | 1  | 6  | 1  | 1  | 5  | 7  | 1  | 1  | 7  | 4  | 7  | 7  |   |   |   |
| 7 | 7 | 7 | 7 | 7 | 4 | 7 | 7 | 7 | 7  | 7  | 7  | 1  | 7  | 4  | 7  | 7  | 2  | 1  | 4  | 4  | 7  | 4  | 7  | 4  | 1  | 1  | 1  | 1  | 4  | 7  | 7  | 7  | 7  | 7  | 7  | 7  | 7  |   |   |   |
| 7 | 7 | 7 | 6 | 7 | 6 | 4 | 5 | 7 | 5  | 6  | 5  | 6  | 1  | 7  | 3  | 5  | 7  | 2  | 5  | 6  | 7  | 4  | 3  | 7  | 7  | 5  | 5  | 4  | 3  | 4  | 7  | 1  | 1  | 7  | 6  | 6  | 7  |   |   |   |
| 7 | 7 | 7 | 7 | 7 | 7 | 7 | 7 | 7 | 7  | 7  | 7  | 7  | 4  | 7  | 4  | 4  | 7  | 7  | 7  | 7  | 1  | 7  | 3  | 7  | 7  | 1  | 7  | 7  | 4  | 1  | 7  | 7  | 4  | 1  | 7  | 6  | 6  | 7 |   |   |
| 7 | 7 | 7 | 7 | 7 | 7 | 7 | 7 | 7 | 7  | 7  | 7  | 7  | 1  | 7  | 5  | 5  | 7  | 7  | 6  | 6  | 4  | 3  | 6  | 6  | 3  | 6  | 3  | 3  | 4  | 7  | 5  | 7  | 1  | 1  | 5  | 5  | 7  | 7 |   |   |
| 7 | 7 | 6 | 7 | 6 | 4 | 6 | 7 | 7 | 7  | 6  | 5  | 7  | 6  | 6  | 7  | 6  | 7  | 5  | 4  | 7  | 6  | 3  | 7  | 7  | 7  | 1  | 3  | 1  | 6  | 1  | 5  | 2  | 7  | 6  | 7  | 6  | 7  | 7 |   |   |
| 6 | 7 | 6 | 7 | 7 | 4 | 6 | 6 | 7 | 7  | 7  | 4  | 6  | 7  | 6  | 6  | 6  | 7  | 4  | 3  | 7  | 2  | 1  | 7  | 7  | 1  | 2  | 1  | 7  | 4  | 7  | 1  | 7  | 6  | 6  | 7  | 7  | 7  | 7 |   |   |
| 7 | 7 | 7 | 6 | 6 | 7 | 6 | 6 | 6 | 6  | 7  | 7  | 6  | 6  | 7  | 5  | 6  | 6  | 7  | 5  | 6  | 6  | 5  | 6  | 4  | 5  | 6  | 5  | 7  | 6  | 6  | 7  | 1  | 1  | 1  | 6  | 5  | 6  | 7 | 7 |   |
| 7 | 7 | 7 | 7 | 7 | 6 | 6 | 6 | 7 | 7  | 7  | 7  | 1  | 7  | 7  | 6  | 7  | 6  | 7  | 5  | 5  | 7  | 1  | 7  | 7  | 1  | 7  | 1  | 1  | 4  | 6  | 2  | 7  | 6  | 7  | 6  | 7  | 7  | 7 |   |   |
| 7 | 7 | 7 | 7 | 7 | 4 | 6 | 7 | 7 | 7  | 7  | 7  | 7  | 4  | 7  | 6  | 7  | 6  | 4  | 5  | 6  | 4  | 5  | 6  | 4  | 5  | 6  | 5  | 7  | 6  | 6  | 7  | 1  | 1  | 2  | 1  | 7  | 7  | 7 | 7 |   |
| 7 | 7 | 7 | 7 | 7 | 7 | 7 | 7 | 7 | 7  | 6  | 6  | 4  | 1  | 7  | 3  | 6  | 6  | 3  | 5  | 7  | 4  | 2  | 6  | 5  | 7  | 4  | 2  | 6  | 5  | 7  | 1  | 2  | 1  | 5  | 5  | 5  | 5  | 5 | 5 |   |
| 5 | 7 | 6 | 5 | 6 | 4 | 4 | 5 | 5 | 7  | 7  | 2  | 3  | 7  | 4  | 4  | 7  | 4  | 2  | 4  | 2  | 4  | 7  | 1  | 1  | 7  | 7  | 1  | 5  | 1  | 3  | 7  | 7  | 1  | 1  | 2  | 5  | 6  | 6 | 6 |   |
| 7 | 7 | 7 | 7 | 7 | 7 | 7 | 7 | 7 | 7  | 6  | 6  | 7  | 1  | 7  | 4  | 5  | 7  | 2  | 4  | 5  | 7  | 2  | 7  | 7  | 1  | 2  | 7  | 7  | 3  | 5  | 2  | 5  | 6  | 6  | 6  | 6  | 6  | 6 | 6 |   |
| 7 | 7 | 7 | 7 | 7 | 7 | 7 | 7 | 7 | 7  | 6  | 6  | 7  | 1  | 7  | 4  | 5  | 6  | 7  | 5  | 6  | 6  | 3  | 5  | 6  | 6  | 3  | 1  | 7  | 7  | 3  | 1  | 1  | 7  | 4  | 7  | 1  | 6  | 6 | 6 | 6 |
| 7 | 7 | 7 | 7 | 7 | 7 | 7 | 7 | 7 | 7  | 6  | 6  | 7  | 1  | 7  | 4  | 5  | 6  | 7  | 5  | 6  | 6  | 3  | 5  | 6  | 6  | 3  | 1  | 7  | 7  | 3  | 1  | 1  | 7  | 4  | 7  | 1  | 6  | 6 | 6 | 6 |
| 7 | 7 | 7 | 7 | 7 | 7 | 7 | 7 | 7 | 7  | 6  | 6  | 7  | 1  | 7  | 4  | 5  | 6  | 7  | 5  | 6  | 6  | 3  | 5  | 6  | 6  | 3  | 1  | 7  | 7  | 3  | 1  | 1  | 7  | 4  | 7  | 1  | 6  | 6 | 6 | 6 |
| 7 | 7 | 7 | 7 | 7 | 7 | 7 | 7 | 7 | 7  | 6  | 6  | 7  | 1  | 7  | 4  | 5  | 6  | 7  | 5  | 6  | 6  | 3  | 5  | 6  | 6  | 3  | 1  | 7  | 7  | 3  | 1  | 1  | 7  | 4  | 7  | 1  | 6  | 6 | 6 | 6 |
| 7 | 7 | 7 | 7 | 7 | 7 | 7 | 7 | 7 | 7  | 6  | 6  | 7  | 1  | 7  | 4  | 5  | 6  | 7  | 5  | 6  | 6  | 3  | 5  | 6  | 6  | 3  | 1  | 7  | 7  | 3  | 1  | 1  | 7  | 4  | 7  | 1  | 6  | 6 | 6 | 6 |
| 7 | 7 | 7 | 7 | 7 | 7 | 7 | 7 | 7 | 7  | 6  | 6  | 7  | 1  | 7  | 4  | 5  | 6  | 7  | 5  | 6  | 6  | 3  | 5  | 6  | 6  | 3  | 1  | 7  | 7  | 3  | 1  | 1  | 7  | 4  | 7  | 1  | 6  | 6 | 6 | 6 |
| 7 | 7 | 7 | 7 | 7 | 7 | 7 | 7 | 7 | 7  | 6  | 6  | 7  | 1  | 7  | 4  | 5  | 6  | 7  | 5  | 6  | 6  | 3  | 5  | 6  | 6  | 3  | 1  | 7  | 7  | 3  | 1  | 1  | 7  | 4  | 7  | 1  | 6  | 6 | 6 | 6 |
| 7 | 7 | 7 | 7 | 7 | 7 | 7 | 7 | 7 | 7  | 6  | 6  | 7  | 1  | 7  | 4  | 5  | 6  | 7  | 5  | 6  | 6  | 3  | 5  | 6  | 6  | 3  | 1  | 7  | 7  | 3  | 1  | 1  | 7  | 4  | 7  | 1  | 6  | 6 | 6 | 6 |
| 7 | 7 | 7 | 7 | 7 | 7 | 7 | 7 | 7 | 7  | 6  | 6  | 7  | 1  | 7  | 4  | 5  | 6  | 7  | 5  | 6  | 6  | 3  | 5  | 6  | 6  | 3  | 1  | 7  | 7  | 3  | 1  | 1  | 7  | 4  | 7  | 1  | 6  | 6 | 6 | 6 |
| 7 | 7 | 7 | 7 | 7 | 7 | 7 | 7 | 7 | 7  | 6  | 6  | 7  | 1  | 7  | 4  | 5  | 6  | 7  | 5  | 6  | 6  | 3  | 5  | 6  | 6  | 3  | 1  | 7  | 7  | 3  | 1  | 1  | 7  | 4  | 7  | 1  | 6  | 6 | 6 | 6 |
| 7 | 7 | 7 | 7 | 7 | 7 | 7 | 7 | 7 | 7  | 6  | 6  | 7  | 1  | 7  | 4  | 5  | 6  | 7  | 5  | 6  | 6  | 3  | 5  | 6  | 6  | 3  | 1  | 7  | 7  | 3  | 1  | 1  | 7  | 4  | 7  | 1  | 6  | 6 | 6 | 6 |
| 7 | 7 | 7 | 7 | 7 | 7 | 7 | 7 | 7 | 7  | 6  | 6  | 7  | 1  | 7  | 4  | 5  | 6  | 7  | 5  | 6  | 6  | 3  | 5  | 6  | 6  | 3  | 1  | 7  | 7  | 3  | 1  | 1  | 7  | 4  | 7  | 1  | 6  | 6 | 6 | 6 |
| 7 | 7 | 7 | 7 | 7 | 7 | 7 | 7 | 7 | 7  | 6  | 6  | 7  | 1  | 7  | 4  | 5  | 6  | 7  | 5  | 6  | 6  | 3  | 5  | 6  | 6  | 3  | 1  | 7  | 7  | 3  | 1  | 1  | 7  | 4  | 7  | 1  | 6  | 6 | 6 | 6 |
| 7 | 7 | 7 | 7 | 7 | 7 | 7 | 7 | 7 | 7  | 6  | 6  | 7  | 1  | 7  | 4  | 5  | 6  | 7  | 5  | 6  | 6  | 3  | 5  | 6  | 6  | 3  | 1  | 7  | 7  | 3  | 1  | 1  | 7  | 4  | 7  | 1  | 6  | 6 | 6 | 6 |
| 7 | 7 | 7 | 7 | 7 | 7 | 7 | 7 | 7 | 7  | 6  | 6  | 7  | 1  | 7  | 4  | 5  | 6  | 7  | 5  | 6  | 6  | 3  | 5  | 6  | 6  | 3  | 1  | 7  | 7  | 3  | 1  | 1  | 7  | 4  | 7  | 1  | 6  | 6 | 6 | 6 |
| 7 | 7 | 7 | 7 | 7 | 7 | 7 | 7 | 7 | 7  | 6  | 6  | 7  | 1  | 7  | 4  | 5  | 6  | 7  | 5  | 6  | 6  | 3  | 5  | 6  | 6  | 3  | 1  | 7  | 7  | 3  | 1  | 1  | 7  | 4  | 7  | 1  | 6  | 6 | 6 | 6 |
| 7 | 7 | 7 | 7 | 7 | 7 | 7 | 7 | 7 | 7  | 6  | 6  | 7  | 1  | 7  | 4  | 5  | 6  | 7  | 5  | 6  | 6  | 3  | 5  | 6  | 6  | 3  | 1  | 7  | 7  | 3  | 1  | 1  | 7  | 4  | 7  | 1  | 6  | 6 | 6 | 6 |
| 7 | 7 | 7 | 7 | 7 | 7 | 7 | 7 | 7 | 7  | 6  | 6  | 7  | 1  | 7  | 4  | 5  | 6  | 7  | 5  | 6  | 6  | 3  | 5  | 6  | 6  | 3  | 1  | 7  | 7  | 3  | 1  | 1  | 7  | 4  | 7  | 1  | 6  | 6 | 6 | 6 |
| 7 | 7 | 7 | 7 | 7 | 7 | 7 | 7 | 7 | 7  | 6  | 6  | 7  | 1  | 7  | 4  | 5  | 6  | 7  | 5  | 6  | 6  | 3  | 5  | 6  | 6  | 3  | 1  | 7  | 7  | 3  | 1  | 1  | 7  | 4  | 7  | 1  | 6  | 6 | 6 | 6 |
| 7 | 7 | 7 | 7 | 7 | 7 | 7 | 7 | 7 | 7  | 6  | 6  | 7  | 1  | 7  | 4  | 5  | 6  | 7  | 5  | 6  | 6  | 3  | 5  | 6  | 6  | 3  | 1  | 7  | 7  | 3  | 1  | 1  | 7  | 4  | 7  | 1  | 6  | 6 | 6 | 6 |
| 7 | 7 | 7 | 7 | 7 | 7 | 7 | 7 | 7 | 7  | 6  | 6  | 7  | 1  | 7  | 4  | 5  | 6  | 7  | 5  | 6  | 6  | 3  | 5  | 6  | 6  | 3  | 1  | 7  | 7  | 3  | 1  | 1  | 7  | 4  | 7  | 1  | 6  | 6 | 6 | 6 |
| 7 | 7 | 7 | 7 | 7 | 7 | 7 | 7 | 7 | 7  | 6  | 6  | 7  | 1  | 7  | 4  | 5  | 6  | 7  | 5  | 6  | 6  | 3  | 5  | 6  | 6  | 3  | 1  | 7  | 7  | 3  | 1  | 1  | 7  | 4  | 7  | 1  | 6  | 6 | 6 | 6 |
| 7 | 7 | 7 | 7 | 7 | 7 | 7 | 7 | 7 | 7  | 6  | 6  | 7  | 1  | 7  | 4  | 5  | 6  | 7  | 5  | 6  | 6  | 3  | 5  | 6  | 6  | 3  | 1  | 7  | 7  | 3  | 1  | 1  | 7  | 4  | 7  | 1  | 6  | 6 | 6 | 6 |
| 7 | 7 | 7 | 7 | 7 | 7 | 7 | 7 | 7 | 7  | 6  | 6  | 7  | 1  | 7  | 4  | 5  | 6  | 7  | 5  | 6  | 6  | 3  | 5  | 6  | 6  | 3  | 1  | 7  | 7  | 3  | 1  | 1  | 7  | 4  | 7  | 1  | 6  | 6 | 6 | 6 |
| 7 | 7 | 7 | 7 | 7 | 7 | 7 | 7 | 7 | 7  | 6  | 6  | 7  | 1  | 7  | 4  | 5  | 6  | 7  | 5  | 6  | 6  | 3  | 5  | 6  | 6  | 3  | 1  | 7  | 7  | 3  | 1  | 1  | 7  | 4  | 7  | 1  | 6  | 6 | 6 | 6 |
| 7 | 7 | 7 | 7 | 7 | 7 | 7 | 7 | 7 | 7  | 6  | 6  | 7  | 1  | 7  | 4  | 5  | 6  | 7  | 5  | 6  | 6  | 3  | 5  | 6  | 6  | 3  | 1  | 7  | 7  | 3  | 1  | 1  | 7  | 4  | 7  | 1  | 6  | 6 | 6 | 6 |
| 7 | 7 | 7 | 7 | 7 | 7 | 7 | 7 | 7 | 7  | 6  | 6  | 7  | 1  | 7  | 4  | 5  | 6  | 7  | 5  | 6  | 6  | 3  | 5  | 6  | 6  | 3  | 1  | 7  | 7  | 3  | 1  | 1  | 7  | 4  | 7  | 1  | 6  | 6 | 6 | 6 |
| 7 | 7 | 7 | 7 | 7 | 7 | 7 | 7 | 7 | 7  | 6  | 6  | 7  | 1  | 7  | 4  | 5  | 6  | 7  | 5  | 6  | 6  | 3  | 5  | 6  | 6  | 3  | 1  | 7  | 7  | 3  | 1  | 1  | 7  | 4  | 7  | 1  | 6  | 6 | 6 | 6 |
| 7 | 7 | 7 | 7 | 7 | 7 | 7 | 7 | 7 | 7  | 6  | 6  | 7  | 1  | 7  | 4  | 5  | 6  | 7  | 5  | 6  | 6  | 3  | 5  | 6  | 6  | 3  | 1  | 7  | 7  | 3  | 1  | 1  | 7  | 4  | 7  | 1  | 6  | 6 | 6 |   |



1  
2  
3  
4  
5  
6  
7  
8  
9  
10  
11  
12  
13  
14  
15  
16  
17  
18  
19  
20  
21  
22  
23  
24  
25  
26  
27  
28  
29  
30  
31  
32  
33  
34  
35  
36  
37  
38  
39  
40  
41  
42  
43  
44  
45  
46

40

**SURVEY SCORE (POST)**

|    |
|----|
| 47 |
| 61 |
| 45 |
| 46 |
| 46 |
| 45 |
| 46 |
| 51 |
| 47 |
| 37 |
| 54 |
| 39 |
| 43 |
| 52 |
| 39 |
| 55 |
| 50 |
| 52 |
| 53 |
| 30 |
| 49 |
| 55 |
| 53 |
| 37 |
| 46 |
| 55 |
| 48 |
| 51 |
| 55 |
| 45 |
| 54 |
| 59 |
| 26 |
| 61 |
| 36 |
| 45 |
| 41 |
| 61 |
| 57 |
| 51 |
| 37 |
| 49 |
| 40 |
| 59 |
| 67 |
| 40 |
| 42 |
| 44 |
| 46 |
| 49 |
| 40 |
| 48 |
| 60 |
| 39 |
| 59 |
| 40 |
| 39 |
| 58 |
| 44 |
| 45 |
| 54 |
| 53 |
| 42 |
| 43 |
| 58 |
| 48 |
| 47 |
| 50 |
| 56 |
| 66 |
| 61 |
| 57 |
| 44 |
| 36 |
| 55 |
| 56 |
| 58 |
| 57 |
| 58 |
| 61 |
| 46 |
| 59 |
| 45 |
| 46 |
| 49 |
| 53 |
| 51 |
| 52 |

For peer review only



# BMJ Open

## Improving community pharmacists' clinical knowledge to detect and resolve drug-related problems in Croatia: a before/after survey study investigating the efficacy of an educational intervention

|                                 |                                                                                                                                                                                                                                                                                                                                                                                                                                                                                                                                                                                                                                        |
|---------------------------------|----------------------------------------------------------------------------------------------------------------------------------------------------------------------------------------------------------------------------------------------------------------------------------------------------------------------------------------------------------------------------------------------------------------------------------------------------------------------------------------------------------------------------------------------------------------------------------------------------------------------------------------|
| Journal:                        | <i>BMJ Open</i>                                                                                                                                                                                                                                                                                                                                                                                                                                                                                                                                                                                                                        |
| Manuscript ID                   | bmjopen-2019-034674.R2                                                                                                                                                                                                                                                                                                                                                                                                                                                                                                                                                                                                                 |
| Article Type:                   | Original research                                                                                                                                                                                                                                                                                                                                                                                                                                                                                                                                                                                                                      |
| Date Submitted by the Author:   | 05-Feb-2020                                                                                                                                                                                                                                                                                                                                                                                                                                                                                                                                                                                                                            |
| Complete List of Authors:       | Zekan, Lovre; Split-Dalmatia County Pharmacy; University of Split School of Medicine, Department of Pharmacy<br>Mestrovic, Arijana; University of Split School of Medicine, Department of Pharmacy; Pharmaexpert LLC<br>Perisin, Ana; University of Split School of Medicine, Department of Pharmacy<br>Bukic, Josipa; University of Split School of Medicine, Department of Pharmacy<br>Leskur, Dario; University of Split School of Medicine, Department of Pharmacy<br>Rusic, Doris; University of Split School of Medicine, Department of Pharmacy<br>Modun, Darko; University of Split School of Medicine, Department of Pharmacy |
| <b>Primary Subject Heading</b>: | Medical education and training                                                                                                                                                                                                                                                                                                                                                                                                                                                                                                                                                                                                         |
| Secondary Subject Heading:      | Public health, General practice / Family practice, Pharmacology and therapeutics                                                                                                                                                                                                                                                                                                                                                                                                                                                                                                                                                       |
| Keywords:                       | EDUCATION & TRAINING (see Medical Education & Training), THERAPEUTICS, PRIMARY CARE                                                                                                                                                                                                                                                                                                                                                                                                                                                                                                                                                    |
|                                 |                                                                                                                                                                                                                                                                                                                                                                                                                                                                                                                                                                                                                                        |

SCHOLARONE™  
Manuscripts



I, the Submitting Author has the right to grant and does grant on behalf of all authors of the Work (as defined in the below author licence), an exclusive licence and/or a non-exclusive licence for contributions from authors who are: i) UK Crown employees; ii) where BMJ has agreed a CC-BY licence shall apply, and/or iii) in accordance with the terms applicable for US Federal Government officers or employees acting as part of their official duties; on a worldwide, perpetual, irrevocable, royalty-free basis to BMJ Publishing Group Ltd ("BMJ") its licensees and where the relevant Journal is co-owned by BMJ to the co-owners of the Journal, to publish the Work in this journal and any other BMJ products and to exploit all rights, as set out in our [licence](#).

The Submitting Author accepts and understands that any supply made under these terms is made by BMJ to the Submitting Author unless you are acting as an employee on behalf of your employer or a postgraduate student of an affiliated institution which is paying any applicable article publishing charge ("APC") for Open Access articles. Where the Submitting Author wishes to make the Work available on an Open Access basis (and intends to pay the relevant APC), the terms of reuse of such Open Access shall be governed by a Creative Commons licence – details of these licences and which [Creative Commons](#) licence will apply to this Work are set out in our licence referred to above.

Other than as permitted in any relevant BMJ Author's Self Archiving Policies, I confirm this Work has not been accepted for publication elsewhere, is not being considered for publication elsewhere and does not duplicate material already published. I confirm all authors consent to publication of this Work and authorise the granting of this licence.

1  
2  
3 1 **Improving community pharmacists' clinical knowledge to detect and resolve**  
4  
5  
6 2 **drug-related problems in Croatia: a before/after survey study investigating**  
7  
8  
9 3 **the efficacy of an educational intervention**  
10  
11 4

13 5 Lovre Zekan<sup>1,2</sup>, Arijana Mestrovic<sup>2,3</sup>, Ana Seselja Perisin<sup>2</sup>, Josipa Bukic<sup>2</sup>, Dario Leskur<sup>2</sup>, Doris  
14  
15  
16 6 Rusic<sup>2</sup>, Darko Modun<sup>2\*</sup>  
17  
18 7

20 8 <sup>1</sup>Split-Dalmatia County Pharmacy, Split, Croatia

22 9 <sup>2</sup>Department of Pharmacy, University of Split School of Medicine, Split, Croatia

24 10 <sup>3</sup>Pharmaexpert LLC, Zagreb, Croatia  
25  
26  
27 11  
28  
29  
30 12

31 13 \*Corresponding author:

33 14 Darko Modun

35 15 Department of Pharmacy

37 16 University of Split School of Medicine

39 17 Soltanska 2, 21000 Split

41 18 Croatia

43 19 Phone: +38521557851, Fax: +38521557895, E-mail: [dmodun@mefst.hr](mailto:dmodun@mefst.hr)  
45  
46  
47 20

49 21 **Word count: 3686**  
50  
51  
52  
53  
54  
55  
56  
57  
58  
59  
60

## Abstract

**Objectives:** The aim of this study was to increase the knowledge level of community pharmacists in Croatia to identify and resolve drug-related problems (DRPs).

**Design:** Before/after survey study.

**Setting:** University of Split School of Medicine.

**Participants:** 115 community pharmacists from all over the Croatia.

**Interventions:** An interactive three-day clinical pharmacy workshop with the goal of increasing the knowledge level of community pharmacists in Croatia to identify and resolve DRPs in routine practice. Teaching methods were based on interactive clinical case solving.

**Outcome measure:** Change of the community pharmacists' knowledge based on pre- and post-workshop evaluation. Survey-based clinical knowledge measurement tool was used in order to evaluate the efficacy of the workshop. The lowest possible total score was 0 and the highest was 80. A higher survey score indicates a higher level of clinical knowledge to identify and resolve DRPs.

**Results:** Participating pharmacists had significantly higher post-workshop mean survey score ( $49.1 \pm 8.0$ ) than the pre-workshop mean survey score ( $42.9 \pm 8.2$ ), with the mean score difference of 6.2 (95% CI: 4.3 to 8.1). Furthermore, it was found that community pharmacists significantly increased their survey scores, regardless of their age.

**Conclusions:** Interactive and case-based clinical pharmacy workshop could be a valuable tool to increase the knowledge of community pharmacists about identification and management of DRPs in routine practice. However, further studies are necessary to evaluate the long-term knowledge maintenance and the improvement in patients' clinical outcomes.

## 46 **Article Summary**

### 47 **Strengths and limitations of this study**

- 48
- 49 • This study included 115 community pharmacists from all over the country, and out of  
50 them 88 completed the survey both times, which is about 4% of all community  
51 pharmacists in Croatia.
  - 52 • Educational intervention was interactive and case-based, and survey-based clinical  
53 knowledge measurement tool was validated previously and successfully used in  
54 Australia.
  - 55 • Follow-up evaluations are needed in order to evaluate the long-term efficacy of the  
56 educational intervention.
  - 57 • The participation was voluntary and this could compromise the representativeness of the  
58 sample.

## 59 **Introduction**

60 Drug-related problems (DRPs) represent a public health problem, both in terms of patient  
61 outcomes and healthcare expenditures, as they can ultimately lead to drug-related complications,  
62 such as drug-related morbidity or mortality. Community pharmacists, as contributors to patient  
63 care, should assess data concerning untoward effects of drugs and be well skilled to recognize  
64 and prevent these drug-related complications, which result from unidentified or unresolved  
65 DRPs.<sup>1 2</sup> The pharmaceutical care concept, as one of the pillars of modern pharmacy services,  
66 assumes clinical interventions which lead to optimal health outcomes. Identification, prevention  
67 or resolution of DRPs improves patient's health outcomes, and therefore it should be integrated  
68 within pharmaceutical care.<sup>3 4</sup> However, community pharmacists must have the extensive clinical

1  
2  
3 69 knowledge and the sufficient training in order to identify and resolve DRPs. Therefore,  
4  
5 70 knowledge and training are important prerequisites to efficiently provide pharmaceutical care.<sup>5-9</sup>  
6  
7  
8  
9 71 In our previous study, it was suggested that the additional education of community pharmacists  
10  
11 72 in Croatia is associated with the higher level of clinical knowledge to detect and resolve DRPs ( $\beta$   
12  
13 73 = 0.272,  $P < 0.001$ ).<sup>10</sup> It was concluded that the additional education could increase the  
14  
15 74 community pharmacists' knowledge level and thus probably make pharmaceutical care  
16  
17  
18 75 implementation more effective. Furthermore, using the same knowledge measurement tool, it  
19  
20 76 was found that community pharmacists from Australia compared to the colleagues from Croatia  
21  
22 77 seem to have a higher level of clinical knowledge to detect and resolve DRPs.<sup>11</sup> This finding  
23  
24 78 indicated a general need for the improvement in the knowledge level of community pharmacists  
25  
26  
27 79 in Croatia. This was not an unexpected finding, since clinical pharmacy and pharmaceutical care  
28  
29 80 models are still in the initial stages of development in Croatia. Firstly, Centre for Applied  
30  
31 81 Pharmacy was established at the University of Zagreb Faculty of Pharmacy and Biochemistry in  
32  
33 82 2004. Afterwards, clinical pharmacy was the first subject to be introduced to the revised  
34  
35 83 pharmacy curricula. Patient-oriented subjects such as pharmacotherapy, communication skills,  
36  
37 84 pharmacy practice and pharmaceutical care were introduced between 2006 and 2009.<sup>12</sup> At that  
38  
39 85 time, University of Zagreb Faculty of Pharmacy and Biochemistry was the only faculty for  
40  
41 86 education of pharmacists in Croatia. Consequently, the majority of today's practicing community  
42  
43 87 pharmacists did not attend courses on these disciplines as a part of their graduate education due  
44  
45 88 to the unavailability of such courses. Furthermore, the most of available education for licensed  
46  
47 89 community pharmacists was aimed at promoting the products and consequently was without  
48  
49 90 significant benefits to pharmacists' knowledge about DRPs.  
50  
51  
52  
53  
54  
55  
56  
57  
58  
59  
60

1  
2  
3 91 Previously, Mestrovic et al. also identified that community pharmacists in Croatia lack skills in  
4  
5 92 the areas of monitoring drug therapy, patient consultation and the evaluation of outcomes, and  
6  
7 93 that they believe they need to complete supplemental educational programs to be able to  
8  
9  
10 94 efficiently provide pharmaceutical care.<sup>13</sup>

11  
12  
13 95 Therefore, there seems to be a need for an additional education programs that could fill the gap  
14  
15 96 in community pharmacists' knowledge about DRPs, and presumably improve patients' health  
16  
17 97 outcomes. Highly interactive and multifaceted learning methods, such as workshops are reported  
18  
19 98 to be highly effective strategies to improve knowledge, professional practice and healthcare  
20  
21 99 outcomes.<sup>14-17</sup> Furthermore, continuing education programs in the form of an educational  
22  
23 100 workshop have shown to improve community pharmacists' knowledge and clinical skills in  
24  
25 101 practice.<sup>5 12 18-20</sup> Hence, we planned an educational intervention in the form of a workshop with  
26  
27 102 the goal of improving the clinical knowledge level of community pharmacists in Croatia.  
28  
29  
30  
31

## 32 33 103 **Methods**

34  
35 104

### 36 37 105 **Workshop setting**

38  
39  
40  
41 106 A three-day clinical pharmacy workshop for community pharmacists in Croatia was organized.  
42  
43 107 Workshop was advertised nationwide, with the help of Croatian Chamber of Pharmacists and  
44  
45 108 Croatian Pharmaceutical Society. Participation was voluntary and community pharmacists from  
46  
47 109 all over Croatia participated. The workshop lasted for a total of 20 hours, and during that time  
48  
49 110 various topics in the area of clinical pharmacy and pharmacotherapy were discussed, as shown in  
50  
51 111 Table 1.  
52  
53  
54  
55  
56  
57  
58  
59  
60

112 Table 1. Curriculum of the workshop

| Topic                                                 | Number of<br>teaching<br>hours | Main teaching method  |
|-------------------------------------------------------|--------------------------------|-----------------------|
| Pharmaceutical care in practice                       | 1                              | Formal lectures       |
| Rational pharmacotherapy and drug-related<br>problems | 1                              | Formal lectures       |
| Clinical pharmacy and evidence-based<br>medicine      | 1                              | Formal lectures       |
| Routine laboratory tests                              | 1.5                            | Clinical case solving |
| Food and drug interactions                            | 1                              | Clinical case solving |
| Pharmacokinetic and pharmacodynamic<br>interactions   | 1                              | Clinical case solving |
| Hormone therapy                                       | 1.5                            | Clinical case solving |
| Psychotropic drugs and antidepressants                | 1.5                            | Clinical case solving |
| Antimicrobial drugs                                   | 1.5                            | Clinical case solving |
| Rare diseases                                         | 1.5                            | Clinical case solving |
| Hypertension and anticoagulants                       | 1                              | Clinical case solving |
| Dyslipidemia and diabetes                             | 1                              | Clinical case solving |
| Narrow therapeutic index drugs                        | 1.5                            | Clinical case solving |
| Medication errors                                     | 2                              | Clinical case solving |
| Priority assessment in pharmacotherapy                | 2                              | Clinical case solving |



1  
2  
3 113 The workshop was held in a lecture hall at University of Split School of Medicine with the help  
4  
5 114 of assistants and pharmacy students. They supervised all participants during the workshop, and  
6  
7 115 participants who did not attend all sessions were considered to have dropped out from the study.  
8  
9  
10 116 A pharmacist and a pharmacologist were trainers who prepared and presented workshop  
11  
12 117 materials and discussions. Both trainers have appropriate education and qualifications, for  
13  
14 118 example the pharmacist is a competency development manager and lecturer of pharmaceutical  
15  
16 119 care with a PhD and ambulatory care specialization from American College of Clinical  
17  
18 120 Pharmacy and the pharmacologist is a professor of pharmacology and clinical pharmacy at  
19  
20 121 University of Split School of Medicine. Furthermore, key elements of an effective educational  
21  
22 122 activity, like formal lectures and interactive clinical case solving and exercises, were  
23  
24 123 incorporated into the program. The workshop was designed to provide a brief overview about  
25  
26 124 each topic, but then clinical cases were solved and discussed for the most of the workshop time.  
27  
28  
29 125 Cases were prepared according to the clinical case models available in the literature.<sup>21 22</sup> By  
30  
31 126 lifting the letter card, each participant had to answer for which of the 4 statements in each case  
32  
33 127 he thought was the most correct. After all participants had revealed their answers, discussion on  
34  
35 128 each statement followed. Participants were also invited to present a few of their own cases from  
36  
37 129 routine practice. From 150 clinical cases, one of the most important learning objectives was  
38  
39 130 increasing the knowledge through the identification and resolution of DRPs in the presented  
40  
41 131 cases. Other learning objectives included developing skill of decision-making process in routine  
42  
43 132 practice, priority assessment in pharmacotherapy and general introduction to the concept of  
44  
45 133 pharmaceutical care.  
46  
47  
48  
49  
50

#### 51 52 53 134 **Evaluation of the workshop efficacy** 54 55 56 57 58 59 60

1  
2  
3 135 In order to assess the level of the clinical knowledge of participating community pharmacists  
4  
5 136 pre- and post-workshop, we used a validated survey-based clinical knowledge measurement tool  
6  
7 137 developed by Williams et al.<sup>11</sup> ('supplementary file Survey') Also, the same tool was used in a  
8  
9 138 cross-sectional study with the aim of determining the clinical knowledge level of community  
10  
11 139 pharmacists in Croatia to identify, evaluate and resolve DRPs, as it was previously reported.<sup>10</sup>  
12  
13 140 The survey was structured on nine clinical cases with a total of 40 statements. Clinical cases  
14  
15 141 were based on scenarios that were found to occur frequently in community pharmacies in  
16  
17 142 Australia. Each clinical case was supposed to assess a pharmacist's ability to identify, resolve  
18  
19 143 and evaluate a DRP. The survey was originally validated in Australia, and only validation  
20  
21 144 verification has been carried out in Croatia. Since the same clinical cases with the same DRPs  
22  
23 145 can be routinely found in Croatian community pharmacy practice, authors agreed that the survey  
24  
25 146 was transferable and appropriate for use in Croatia. Therefore, survey was translated to Croatian,  
26  
27 147 and afterwards to confirm the validity of translation, the back-translation from Croatian to  
28  
29 148 English was carried out by a fluent English speaker and experienced biomedical scientist,  
30  
31 149 blinded to the study details and the original wording. The survey was composed in a manner that  
32  
33 150 all participants were asked to read short case scenarios and select how relevant, likely or  
34  
35 151 appropriate they found each of the proposed statements using a seven-point Likert scale. In the  
36  
37 152 first three clinical cases each statement was about additional information that would be relevant  
38  
39 153 to acquire for that case, while the next three cases consisted of statements which described  
40  
41 154 potential DRPs in each case and the final three cases consisted of statements about possible  
42  
43 155 recommendations for the patients. Since the clinical cases were supposed to assess pharmacists'  
44  
45 156 ability to manage DRPs, the type of knowledge that was measured is mostly procedural  
46  
47 157 knowledge, as it includes decision making and problem solving in routine practice. However, to  
48  
49  
50  
51  
52  
53  
54  
55  
56  
57  
58  
59

1  
2  
3 158 be able effectively perform these procedures in practice, pharmacists' procedural knowledge  
4  
5 159 must be based on extensive declarative knowledge.  
6  
7

8  
9 160 All participating community pharmacists were invited on-site to independently complete the  
10  
11 161 survey twice: at the beginning of the workshop and three days later at the end of the last session  
12  
13 162 of the workshop. Participating pharmacists were supervised to complete the survey  
14  
15 163 independently and without access to additional resources or literature. The survey was  
16  
17 164 anonymous, providing only the participant's age, gender and a simple code to match the  
18  
19 165 participants' results before and after the workshop. Study size calculation was not applicable  
20  
21 166 because survey score difference which is associated with significant changes in routine practice  
22  
23 167 is still not known. Therefore, all participating pharmacists were included in this study, except  
24  
25 168 pharmacists who participated in the previous nationwide cross-sectional study, which was the  
26  
27 169 only exclusion criteria.<sup>10</sup>  
28  
29  
30  
31  
32

### 33 170 **Data collection and statistical analysis**

34  
35

36 171 Afterwards, all data were collected in a Microsoft Excel® worksheet (version 15, Redmond,  
37  
38 172 WA, USA) and each completed survey was evaluated and scored. ('supplementary file Dataset')  
39  
40 173 All statements were scored individually and each statement received a score of 2, 1 or 0  
41  
42 174 depending how far away the answer was from the correct answer. The lowest possible total score  
43  
44 175 was 0 and the maximum possible 80. A higher score indicates a higher level of clinical  
45  
46 176 knowledge to detect, evaluate and resolve DRPs, as previously described.<sup>11</sup>  
47  
48  
49  
50

51 177 Statistical calculations and analyses of the data were performed using the IBM SPSS ® statistical  
52  
53 178 package (version 20, Armonk, NY, USA). The graphical figure was prepared with the GraphPad  
54  
55  
56  
57  
58  
59

1  
2  
3 179 Prism software (version 6, La Jolla, CA, USA). Mean scores of the study participants were  
4  
5 180 analyzed with the independent samples and paired samples *t*-test. Normality of data was checked  
6  
7  
8 181 with the Kolmogorov-Smirnov and the Shapiro-Wilk tests. Pearson's correlation was used to  
9  
10 182 correlate pharmacist's score with age. For all tests, a  $P < 0.05$  was considered to be statistically  
11  
12 183 significant. All values are presented as mean  $\pm$  SD.

### 16 184 **Aim of the study**

19 185 The aim of this study was to increase the knowledge level of community pharmacists in Croatia  
20  
21 186 to identify and resolve DRPs. Primary research outcome was the change of the community  
22  
23 187 pharmacists' knowledge based on pre- and post-workshop evaluation. In addition, age and  
24  
25 188 gender subgroup analysis was performed.

### 29 189 **Ethics Committee approval**

31  
32  
33 190 This study was approved by the University of Split School of Medicine Ethics Committee (003-  
34  
35 191 08/15-03/0001) and each participant consented verbally to participate in the study, as approved  
36  
37 192 by the Ethics Committee. Verbal consent was considered to be appropriate because of the  
38  
39 193 favorable risk/benefit ratio for the participants. The intervention was educational and the  
40  
41 194 assessment tool was the written survey so there were no particular risks for the study  
42  
43  
44 195 participants.

### 48 196 **Patient and public involvement**

197 No patients were involved in the design, recruitment and conduct of the study. The study  
 198 participants voluntarily accepted to participate in this study, and they were familiarized with all  
 199 the risks and benefits. They accepted the possibility that results of the study could be published.

## 200 **Results**

201 Overall, 115 community pharmacists attended the workshop, 9 were excluded due to having  
 202 previously completed the survey and in total 88 pharmacists completed the survey both times.  
 203 This represents about 4% of all community pharmacists in Croatia.<sup>23</sup> The response rate, as shown  
 204 in Table 2, was satisfactory because participation was voluntary and some participants dropped  
 205 out before the end of the workshop. Matching method with the simple code was effective, which  
 206 resulted in the successful matching of study participants for further data extraction and  
 207 evaluation.

208 Table 2. Demographics of the matched study participants

|                     | <b>Community<br/>pharmacists</b> |
|---------------------|----------------------------------|
| Age (mean $\pm$ SD) | 36.6 $\pm$ 9.2                   |
| Female (%)          | 90.9                             |
| Male (%)            | 9.1                              |
| Response rate (%)   | 83.0                             |

209 Participating pharmacists had a pre-workshop mean score of  $42.9 \pm 8.2$ , and post-workshop  
 210 mean score of  $49.1 \pm 8.0$ , as presented in Fig 1. The mean score difference of  $6.2 \pm 9.0$ , which

1  
2  
3 211 represents a 14.5% relative increase, was found to be significant with the paired samples *t*-test (*t*  
4  
5 212 = 6.488, *P* < 0.001).

6  
7  
8  
9 213 Fig 1. Pre- and post- workshop survey scores of participating community pharmacists by age and  
10  
11 214 gender subgroups  
12  
13  
14  
15 215 (Figure 1)

16  
17  
18 216 Furthermore, male pharmacists had a pre-workshop mean score of  $42.6 \pm 4.2$ , while female  
19  
20 217 pharmacists had a pre-workshop mean score of  $42.9 \pm 8.5$ , with no significant difference  
21  
22  
23 218 between the scores with the independent samples *t*-test (*t* = -0.09, *P* = 0.93). However, after the  
24  
25 219 workshop only female pharmacists significantly increased their mean score (paired samples *t*-  
26  
27 220 test, *t* = 6.744, *P* < 0.001), with the mean score difference of  $6.9 \pm 9.1$ .

28  
29  
30  
31 221 Pharmacists in both age subgroups significantly increased their mean scores after the workshop  
32  
33 222 (paired samples *t*-test, *t* = 4.786, *t* = 4.342, *P* < 0.001) with nearly the same improvement, as  
34  
35 223 presented in Fig 1. Interestingly, there was no significant difference in the survey scores between  
36  
37  
38 224 age subgroups and we found no correlation between pharmacists' survey scores and their age  
39  
40 225 (Pearson's *r* = 0.009, *n* = 88, *P* = 0.933).

## 41 42 43 44 226 **Discussion**

45  
46  
47 227 The intensive three-day educational workshop on clinical pharmacy seemed to significantly  
48  
49 228 increase the clinical knowledge of community pharmacists in Croatia to detect and resolve  
50  
51 229 DRPs. This finding implies that an intensive case-based educational intervention could  
52  
53  
54 230 potentially fill the gap in community pharmacists' knowledge about DRPs.

1  
2  
3 231 From similar studies, Currie et al. proved that the intensive educational program in  
4  
5 232 pharmaceutical care skills and implementation of these skills in practice successfully increased  
6  
7 233 the rate of identified DRPs.<sup>24</sup> They used the 40-hour training program in two parts with the focus  
8  
9  
10 234 on the improvement of problem-solving and communication skills. Their training program did  
11  
12 235 not include clinical pharmacy topics and was solely focused on pharmaceutical care. In addition,  
13  
14 236 Currie et al. evaluated the impact of an educational intervention directly on patients and found  
15  
16 237 that education of pharmacists in pharmaceutical care improves patient outcomes through  
17  
18 238 identification of DRPs. Kimberlin et al. reported that pharmacists who engaged in an educational  
19  
20 239 intervention program more likely assessed DRPs than pharmacists without the educational  
21  
22 240 intervention and this difference held in the 3-month follow-up period.<sup>25</sup> Their training program  
23  
24 241 included day-long workshop and home study using a training manual. Furthermore, they  
25  
26 242 evaluated the effectiveness of an intervention by interviewing the patients which indicates better  
27  
28 243 outcomes in routine pharmacy practice. In contrast to this study, results of Kimberlin et al. study  
29  
30 244 are based on elderly patients. Furthermore, recently Lalonde et al. demonstrated that having  
31  
32 245 provided community pharmacists with a short disease-specific training and essential clinical  
33  
34 246 information successfully increased pharmacists' knowledge and clinical skills as well as reduced  
35  
36 247 DRP frequency in community pharmacy practice.<sup>26</sup> Lalonde et al. used short 90-minute  
37  
38 248 interactive web based training program on use of medications in chronic kidney disease.  
39  
40 249 Pharmacists in their study completed self-administered questionnaire 12 months later, which  
41  
42 250 showed that pharmacists improved knowledge by 4.5% and clinical skills by 7.4%. Compared to  
43  
44 251 this study it is a smaller relative knowledge increase, however it is maintained a year after  
45  
46 252 educational intervention. According to the Obreli-Neto et al., the majority of continuing  
47  
48 253 education programs were reported to be effective based on the studies' outcome measures.<sup>27</sup> It is  
49  
50  
51  
52  
53  
54  
55  
56  
57  
58  
59  
60

1  
2  
3 254 therefore difficult to compare study results without standardization of outcome measures. Also,  
4  
5 255 studies with similar duration of training and evaluation of participants reported heterogeneous  
6  
7 256 relative knowledge increasement, that ranged from 19% to higher or even 5%, as satisfying.<sup>28 29</sup>  
8  
9  
10  
11 257 Interestingly, this study also implies that community pharmacists' age does not correlate with  
12  
13 258 their clinical knowledge of detecting and resolving DRPs, while Mestrovic et al. study in the  
14  
15 259 community pharmacy setting in Croatia revealed that the age of participants, presumably through  
16  
17 260 experience, improved competency for recognizing and identifying DRPs.<sup>12</sup> However, the two  
18  
19 261 studies used different tools to assess the pharmacist's ability to manage DRPs, and one study  
20  
21 262 primarily evaluated knowledge while the other study evaluated competency, which further  
22  
23 263 involves skills and attitudes of participants. Competency is the ability of pharmacist to make  
24  
25 264 deliberate choices for handling situations and tasks in professional pharmacy practice by using  
26  
27 265 and integrating knowledge and personal values.<sup>30</sup> Assessment of attitudes, skills and personal  
28  
29 266 values requires more sophisticated evaluation methods, for example direct observations and  
30  
31 267 objective structured clinical examinations. Therefore, it is possible that age of pharmacists  
32  
33 268 through experience in practice impacts mostly skills, attitudes and personal values of community  
34  
35 269 pharmacists. As opposed to, pharmacists' knowledge could stagnate over time, especially if it is  
36  
37 270 not renewed with continuous education. This could be the reason for the different findings  
38  
39 271 between the studies, but further research is required in order to clarify this difference. Also, it is  
40  
41 272 interesting that there was no significant difference in the survey scores between age subgroups. It  
42  
43 273 could have been expected that the participants in the younger subgroup should have higher  
44  
45 274 survey scores, considering that this subgroup included pharmacists who studied after the revision  
46  
47 275 of pharmacy curricula. However, first generations of pharmacists who studied under revised  
48  
49 276 program have started working five to six years later, including the obligatory internship,  
50  
51  
52  
53  
54  
55  
56  
57  
58  
59  
60



1  
2  
3 277 therefore it is very likely that their number was not large enough to detect differences between  
4  
5 278 subgroups. It should be further investigated in the future to verify if the curricular revision led to  
6  
7  
8 279 an improvement in pharmacists' knowledge about DRPs.  
9

10  
11 280 Furthermore, it was found that after the workshop only female pharmacists significantly  
12  
13 281 improved their clinical knowledge about DRPs, while male pharmacists retained the same level  
14  
15 282 of knowledge as before the workshop. This potentially could be due to a greater emphasis on  
16  
17  
18 283 pharmaceutical care which as a topic could be more appealing to female pharmacists.<sup>31</sup> However,  
19  
20 284 it is also possible that a small number of male participants (n = 8) was not sufficient to show  
21  
22 285 statistical significance, and therefore this finding is questionable and should be further  
23  
24  
25 286 investigated.  
26

27  
28 287 Surprisingly, even after the workshop the overall survey scores were also lower than the scores  
29  
30 288 from the original study in Australia.<sup>11</sup> Survey was based on clinical cases and DRPs which are  
31  
32 289 relevant in Australian community pharmacy setting. However, the same cases with the same  
33  
34 290 DRPs can be routinely found in Croatian community pharmacy practice, so this could not be the  
35  
36  
37 291 reason for such a difference. As mentioned, this most probably arises from different educational  
38  
39 292 backgrounds and different role of community pharmacists in healthcare systems.<sup>10</sup> Community  
40  
41 293 pharmacists in Croatia are still mostly oriented on traditional pharmacy services like dispensing  
42  
43 294 and supplying of medicines, while additional services, which could expand their role as health  
44  
45 295 care providers, are not available in practice. It is only in the last few years that work has begun to  
46  
47 296 introduce advanced services, like medication review in pharmacy practice. Furthermore, pre-  
48  
49 297 workshop survey scores were also lower than scores in previous nationwide study.<sup>10</sup> However,  
50  
51 298 pharmacists who participated in previous nationwide study were excluded and the only relation  
52  
53  
54  
55  
56  
57  
58  
59  
60

1  
2  
3 299 with this study is that previous study revealed community pharmacists' general lack of  
4  
5 300 knowledge about DRPs. Also, in previous study participants were community pharmacists from  
6  
7 301 large pharmacy chains while this study presumably included more pharmacists who believed that  
8  
9 302 they lack knowledge in this area, since the participation was voluntary. Authors of the workshop  
10  
11 303 expected this since they knew about community pharmacists' general lack of knowledge about  
12  
13 304 DRPs. Therefore, they decided to use the same survey to evaluate the efficacy of educational  
14  
15 305 intervention.  
16  
17  
18  
19

20 306 A major limitation of this study is the fact that post-workshop clinical knowledge scores were  
21  
22 307 evaluated only immediately after the workshop, so these results actually represent short term  
23  
24 308 knowledge gain and are therefore not reflective of any sustained improvement in knowledge.  
25  
26 309 However, patient benefits must be continuous and not limited to certain periods of time. As  
27  
28 310 expected, a majority of studies have also confirmed that training programs increase the  
29  
30 311 knowledge of pharmacists immediately after the educational intervention, and only a few studies  
31  
32 312 revealed that these improvements could be maintained for a year or even longer without any  
33  
34 313 further education.<sup>7 26</sup> Therefore, follow-up evaluations are needed and these results should be  
35  
36 314 supported by conducting a future survey to determine whether improvements were maintained  
37  
38 315 and to further evaluate the efficacy of the educational intervention.  
39  
40  
41  
42  
43

44 316 Another limitation is the possibility of overestimating the results to the general community  
45  
46 317 pharmacist population since the workshop participation was only voluntary. It is therefore  
47  
48 318 possible that only more motivated and enthusiastic pharmacists attended and thus had a greater  
49  
50 319 improvement in knowledge. It is also possible that any prior training of pharmacists could have  
51  
52 320 impacted the pharmacists' knowledge, although this was the first large scale educational  
53  
54  
55  
56  
57  
58  
59

1  
2  
3 321 intervention with the goal of increasing knowledge about DRPs in Croatia. Most of the trainings  
4  
5 322 that pharmacists have previously had were in the form of lifelong learning with various topics  
6  
7 323 from pharmacy practice and were not specifically focused on improving knowledge about DRPs.  
8  
9 324 Therefore, since community pharmacists in Croatia have not previously received any training of  
10  
11 325 this type and there were no pharmacists who have completed postgraduate studies, this was  
12  
13 326 probably not a limitation. Also, since study participants were from all over the country and  
14  
15 327 represent both the small privately-owned pharmacies and the large pharmacy chains and  
16  
17 328 participants gender distribution is representative of Croatian community pharmacists population,  
18  
19 329 generalization of these results to the community pharmacy setting is much more applicable.<sup>32 33</sup>  
20  
21  
22  
23  
24  
25 330 Finally, this study once more confirms previously reported findings that educational  
26  
27 331 interventions through workshops are a useful tool to successfully improve pharmacists'  
28  
29 332 knowledge on various topics in pharmacy practice.<sup>7 19 34 35</sup> Educational interventions can play a  
30  
31 333 vital role in expanding basic pharmacy education and enhancing pharmaceutical care  
32  
33 334 implementation, especially when insufficient training has been received during undergraduate or  
34  
35 335 graduate studies.<sup>36</sup> However, to evaluate the true relevance of these findings for community  
36  
37 336 pharmacy practice, it is still necessary to find out if the increased clinical knowledge level of  
38  
39 337 community pharmacists will result in an increased level of clinical interventions about DRPs in  
40  
41 338 daily practice. For example, one of the clear indicators would be the number of reported adverse  
42  
43 339 drug reactions or documented clinical interventions in this group of pharmacists. If confirmed,  
44  
45 340 these findings could have an important implication for pharmacists' continuing education about  
46  
47 341 DRPs.  
48  
49  
50  
51  
52  
53

## 54 342 **Conclusions**

55  
56  
57  
58  
59  
60

1  
2  
3 343 The interactive and intensive educational intervention through the three-day clinical pharmacy  
4  
5 344 workshop seems to improve the community pharmacists' knowledge to identify, evaluate and  
6  
7 345 resolve DRPs in a simulated routine practice setting. Therefore, educational interventions could  
8  
9  
10 346 be a valuable tool to fill the gap in pharmacist's knowledge about DRP management. Further  
11  
12 347 studies are necessary in order to evaluate long-term knowledge maintenance and the impact of  
13  
14 348 these findings in community pharmacy practice.

## 18 349 **Acknowledgements**

20  
21  
22  
23 350 The authors are grateful to all participating community pharmacists for making this study  
24  
25 351 possible and to Shelly Pranic for proofreading this paper.

## 28 352 **Competing Interests**

29  
30  
31  
32  
33 353 Lovre Zekan is employed by Split-Dalmatia County Pharmacy and Arijana Mestrovic is  
34  
35 354 employed by Pharmaexpert LLC. The authors further declare that they have no competing  
36  
37  
38 355 interests.

## 41 356 **Funding**

42  
43  
44  
45  
46 357 This research received no specific grant from any funding agency in the public, commercial or  
47  
48 358 not-for-profit sectors.

## 51 359 **Author Contributions**

1  
2  
3 360 DM was the leader of this research. LZ interpreted and analyzed the study data. LZ, AM and DM  
4  
5 361 participated in the workshop preparation. ASP, JB, DL and DR participated in conducting the  
6  
7  
8 362 survey. All authors participated in preparation and approved the final manuscript.  
9

## 10 11 363 **Data Availability Statement**

12  
13  
14  
15  
16 364 All data relevant to the study are included in the article or uploaded as supplementary  
17  
18 365 information.  
19

## 20 21 22 366 23 24 25 367 **References**

- 26 368 1. Westerlund T, Marklund B. Assessment of the clinical and economic outcomes of pharmacy  
27 369 interventions in drug-related problems. *J Clin Pharm Ther* 2009;**34**(3):319-27.
- 28 370 2. Kovacevic SV, Miljkovic B, Culafic M, et al. Evaluation of drug-related problems in older  
29 371 polypharmacy primary care patients. *J Eval Clin Pract* 2017;**23**(4):860-65.
- 30 372 3. Allemann SS, van Mil JW, Botermann L, et al. Pharmaceutical care: the PCNE definition  
31 373 2013. *Int J Clin Pharm* 2014;**36**(3):544-55.
- 32 374 4. Cousins D, Kijlstra N, Walser S. Pharmaceutical Care – Policies and Practices for a Safer,  
33 375 More Responsible and Cost-effective Health System: European Directorate for the  
34 376 Quality of Medicines & HealthCare, EDQM, Council of Europe; 2012 [Available from:  
35 377 [https://www.edqm.eu/medias/fichiers/policies\\_and\\_practices\\_for\\_a\\_safer\\_more\\_responsibl.pdf](https://www.edqm.eu/medias/fichiers/policies_and_practices_for_a_safer_more_responsibl.pdf).  
36 378
- 37 379 5. Mehra IV, Wuller CA. Evaluation of a Pilot Clinical Skills Workshop Series for Community  
38 380 Pharmacists. *Am J Pharm Educ* 1998;**62**.
- 39 381 6. Bindoff I, Ling T, Bereznicki L, et al. A Computer Simulation of Community Pharmacy Practice  
40 382 for Educational Use. *Am J Pharm Educ* 2014;**78**(9):168.
- 41 383 7. Basheti IA, Armour CL, Reddel HK, et al. Long-term maintenance of pharmacists' inhaler  
42 384 technique demonstration skills. *Am J Pharm Educ* 2009;**73**(2):32.
- 43 385 8. Westerlund T, Almarsdottir AB, Melander A. Factors influencing the detection rate of drug-  
44 386 related problems in community pharmacy. *Pharm World Sci* 1999;**21**(6):245-50.
- 45 387 9. Lamsam GD, Kropff MA. Community pharmacists' assessments and recommendations for  
46 388 treatment in four case scenarios. *Ann Pharmacother* 1998;**32**(4):409-16.
- 47 389 10. Zekan L, Mestrovic A, Seselja Perisin A, et al. Clinical knowledge of community pharmacists  
48 390 in Croatia for detecting drug-related problems. *Int J Clin Pharm* 2017;**39**(6):1171-74.
- 49 391 11. Williams M, Peterson GM, Tenni PC, et al. A clinical knowledge measurement tool to assess  
50 392 the ability of community pharmacists to detect drug-related problems. *Int J Pharm Pract*  
51 393 2012;**20**(4):238-48.

12. Mestrovic A, Stanicic Z, Hadziabdic MO, et al. Individualized education and competency development of Croatian community pharmacists using the general level framework. *Am J Pharm Educ* 2012;**76**(2):23.
13. Mestrovic A, Stanicic Z, Hadziabdic MO, et al. Evaluation of Croatian community pharmacists' patient care competencies using the general level framework. *Am J Pharm Educ* 2011;**75**(2):36.
14. Roque F, Herdeiro MT, Soares S, et al. Educational interventions to improve prescription and dispensing of antibiotics: a systematic review. *BMC Public Health* 2014;**14**:1276.
15. Pagotto C, Varallo F, Mastroianni P. Impact of educational interventions on adverse drug events reporting. *Int J Technol Assess Health Care* 2013;**29**(4):410-7.
16. Bellolio MF, Stead LG. Evidence-based emergency medicine/systematic review abstract. Continuing education meetings and workshops: effects on professional practice and health care outcomes. *Ann Emerg Med* 2009;**53**(5):685-7.
17. Davis D, O'Brien MA, Freemantle N, et al. Impact of formal continuing medical education: do conferences, workshops, rounds, and other traditional continuing education activities change physician behavior or health care outcomes? *JAMA* 1999;**282**(9):867-74.
18. Villeneuve J, Lamarre D, Lussier MT, et al. Physician-pharmacist collaborative care for dyslipidemia patients: knowledge and skills of community pharmacists. *J Contin Educ Health Prof* 2009;**29**(4):201-8.
19. Abdel Shaheed C, Maher CG, Mak W, et al. The effects of educational interventions on pharmacists' knowledge, attitudes and beliefs towards low back pain. *Int J Clin Pharm* 2015;**37**(4):616-25.
20. Connolly M, Rutter V, Cardiff L. Evaluation of workshop-based peer review training to support pharmacist professional development. *Pharmacy Education* 2016;**16**(1):92 - 94.
21. Dhillon S, Raymond R. *Pharmacy case studies*. London: Pharmaceutical Press, 2009.
22. Dodds LJ. *Drugs in use : clinical case studies for pharmacists*. 4th ed. London ; Chicago: Pharmaceutical Press, 2010.
23. National Health Care Strategy 2012.-2020. Zagreb: Ministry of Health of the Republic of Croatia, 2012.
24. Currie JD, Chrischilles EA, Kuehl AK, et al. Effect of a training program on community pharmacists' detection of and intervention in drug-related problems. *J Am Pharm Assoc (Wash)* 1997;**NS37**(2):182-91.
25. Kimberlin CL, Berardo DH, Pendergast JF, et al. Effects of an education program for community pharmacists on detecting drug-related problems in elderly patients. *Med Care* 1993;**31**(5):451-68.
26. Lalonde L, Quintana-Barcena P, Lord A, et al. Community Pharmacist Training-and-Communication Network and Drug-Related Problems in Patients With CKD: A Multicenter, Cluster-Randomized, Controlled Trial. *Am J Kidney Dis* 2017;**70**(3):386-96.
27. Obreli-Neto PR, Marques Dos Reis T, Guidoni CM, et al. A Systematic Review of the Effects of Continuing Education Programs on Providing Clinical Community Pharmacy Services. *Am J Pharm Educ* 2016;**80**(5):88.
28. Minh PD, Huong DT, Byrkit R, et al. Strengthening pharmacy practice in vietnam: findings of a training intervention study. *Trop Med Int Health* 2013;**18**(4):426-34.
29. Chiang YC, Lee CN, Lin YM, et al. Impact of a continuing education program on pharmacists' knowledge and attitudes toward asthma patient care. *Med Princ Pract* 2010;**19**(4):305-11.
30. Govaerts MJ. Educational competencies or education for professional competence? *Med Educ* 2008;**42**(3):234-6.
31. International Pharmaceutical Federation: Global Pharmacy Workforce Report, 2009. [Available from: [http://fip.org/files/fip/publications/2009\\_FIP\\_Global\\_Pharmacy\\_Workforce\\_Report.pdf](http://fip.org/files/fip/publications/2009_FIP_Global_Pharmacy_Workforce_Report.pdf).

- 1  
2  
3 445 32. Register of pharmacists. Zagreb: Croatian Chamber of Pharmacists; 2020 [Available from:  
4 446 <http://www.hljk.hr/Registri/RegistarIjekarnikauRH/tabid/68/Default.aspx>.  
5 447 33. International Pharmaceutical Federation: Global Pharmacy Workforce Report, 2012.  
6 448 [Available from: <https://www.fip.org/file/1414>.  
7 449 34. Elkalmi RM, Hassali MA, Ibrahim MIM. Impact of Educational Intervention for Improving  
8 450 Pharmacist Knowledge in Adverse Drug Reactions (ADR) Reporting: Experience from  
9 451 Malaysia. Open Drug Saf J 2011;**2**:47-53.  
10 452 35. Austin Z, Marini A, MacLeod Glover N, et al. Peer-mentoring workshop for continuous  
11 453 professional development. Am J Pharm Educ 2006;**70**(5):117.  
12 454 36. International Pharmaceutical Federation: Global Pharmacy Workforce and Migration Report,  
13 455 2006. [Available from:  
14 456 <http://fip.org/files/fip/publications/PharmacyWorkforceMigration.pdf>.  
15 457  
16 458  
17  
18  
19  
20  
21  
22  
23  
24  
25  
26  
27  
28  
29  
30  
31  
32  
33  
34  
35  
36  
37  
38  
39  
40  
41  
42  
43  
44  
45  
46  
47  
48  
49  
50  
51  
52  
53  
54  
55  
56  
57  
58  
59  
60

1  
2  
3 459 (Figure 1 legend)  
4  
5  
6

7 460 All values are presented as mean  $\pm$  SD. Statistically significant differences between pre- and post-workshop scores  
8  
9 461 are marked with a \* symbol (paired samples t-test,  $P < 0.001$ ). Median age of the study participants is 36 years. The  
10  
11 462 number of participants in each subgroup is specified in parentheses ().  
12  
13

14 463  
15  
16  
17  
18  
19  
20  
21  
22  
23  
24  
25  
26  
27  
28  
29  
30  
31  
32  
33  
34  
35  
36  
37  
38  
39  
40  
41  
42  
43  
44  
45  
46  
47  
48  
49  
50  
51  
52  
53  
54  
55  
56  
57  
58  
59  
60

For peer review only



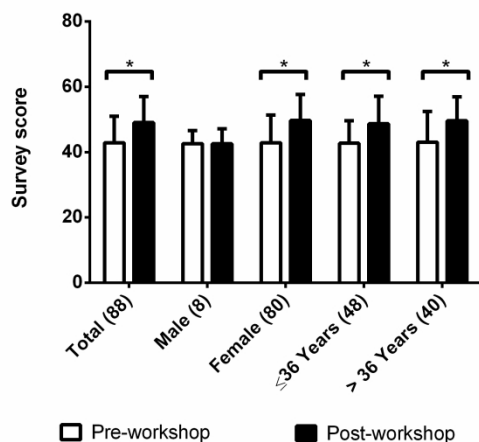

Fig 1. Pre- and post- workshop survey scores of participating community pharmacists by age and gender subgroups

All values are presented as mean ± SD. Statistically significant differences between pre- and post-workshop scores are marked with a \* symbol (paired samples t-test, P < 0.001). Median age of the study participants is 36 years. The number of participants in each subgroup is specified in parentheses ( ).

283x161mm (300 x 300 DPI)

## Clinical knowledge measurement tool about drug-related problems

Gender: (M) Male (F) Female Age (years): \_\_\_\_\_ Code: \_\_\_\_\_

### Instructions: Clinical cases 1 – 3.

For each of the proposed statements, please indicate how relevant it is for each clinical case, by circling the appropriate number on 7-point scale (higher number indicates greater relevance).

#### Clinical case 1

A slightly overweight, 51-year-old female patient who regularly visits your pharmacy presents a prescription for perindopril 5 mg. The dispensing records indicate that the last antihypertensive agent prescribed for this patient was the perindopril/indapamide combination and it was last dispensed 3 months ago. Please indicate how relevant each piece of additional information would be in this case.

|                                                                                     | Totally irrelevant | Moderately irrelevant | Only slightly irrelevant | Neutral | Only slightly relevant | Moderately relevant | Very relevant |
|-------------------------------------------------------------------------------------|--------------------|-----------------------|--------------------------|---------|------------------------|---------------------|---------------|
| 1. Discuss with the patient whether the medication change was intentional.          | 1                  | 2                     | 3                        | 4       | 5                      | 6                   | 7             |
| 2. Discuss with the patient's doctor whether the medication change was intentional. | 1                  | 2                     | 3                        | 4       | 5                      | 6                   | 7             |
| 3. Discuss with the patient their compliance with the antihypertensive agent.       | 1                  | 2                     | 3                        | 4       | 5                      | 6                   | 7             |

#### Clinical case 2

A frail 80-year-old male patient presents to collect his last repeat from his glyceryl trinitrate (GTN) sublingual spray prescription. On dispensing, the pharmacist notices that this is the third time this medication has been dispensed in the last 2 weeks. Please indicate how relevant each piece of additional information would be in this case.

|                                                                                                   | Totally irrelevant | Moderately irrelevant | Only slightly irrelevant | Neutral | Only slightly relevant | Moderately relevant | Very relevant |
|---------------------------------------------------------------------------------------------------|--------------------|-----------------------|--------------------------|---------|------------------------|---------------------|---------------|
| 4. Determine if the pain the patient is feeling is actually due to angina.                        | 1                  | 2                     | 3                        | 4       | 5                      | 6                   | 7             |
| 5. Ask the patient to demonstrate his administration technique.                                   | 1                  | 2                     | 3                        | 4       | 5                      | 6                   | 7             |
| 6. Determine how long since the patient's general practitioner has reviewed his angina treatment. | 1                  | 2                     | 3                        | 4       | 5                      | 6                   | 7             |
| 7. Determine how efficacious the GTN spray is.                                                    | 1                  | 2                     | 3                        | 4       | 5                      | 6                   | 7             |

**Clinical case 3**

A 58 kg, 35-year-old woman presents to the pharmacy to collect a prescription for methotrexate 10 mg weekly from her rheumatologist, which is a new medication for her. Please indicate how relevant each piece of additional information would be in this case.

|                                                                                                                     | Totally irrelevant | Moderately irrelevant | Only slightly irrelevant | Neutral | Only slightly relevant | Moderately relevant | Very relevant |
|---------------------------------------------------------------------------------------------------------------------|--------------------|-----------------------|--------------------------|---------|------------------------|---------------------|---------------|
| 8. Determine if the patient has had baseline liver function tests.                                                  | 1                  | 2                     | 3                        | 4       | 5                      | 6                   | 7             |
| 9. Determine if the patient has had a negative pregnancy test and is currently taking/using adequate contraception. | 1                  | 2                     | 3                        | 4       | 5                      | 6                   | 7             |
| 10. Determine if the side effects of methotrexate have been explained to the patient.                               | 1                  | 2                     | 3                        | 4       | 5                      | 6                   | 7             |
| 11. Determine if the patient has been instructed to take folic acid.                                                | 1                  | 2                     | 3                        | 4       | 5                      | 6                   | 7             |
| 12. Determine how often the patient drinks alcohol.                                                                 | 1                  | 2                     | 3                        | 4       | 5                      | 6                   | 7             |

**Instructions: Clinical cases 4 – 6.**  
 For each of the proposed statements, please indicate how likely it is for each clinical case, by circling the appropriate number on 7-point scale (higher number indicates higher likelihood).

**Clinical case 4**

A 65 kg, 45-year-old female patient comes into the pharmacy to enquire about possible side effects. She was commenced on paroxetine 20 mg daily a few days ago and has been experiencing increasing anxiety (which is the reason the paroxetine was initially started), sweating and tachycardia. She has a medical history of atrial fibrillation and severe lower back pain, and is also taking digoxin, ramipril, tramadol and methadone. Please indicate how likely each drug-related problem would be in this case.

|                                                                                                                                            | Highly unlikely | Moderately unlikely | Only slightly unlikely | Neutral | Only slightly likely | Moderately likely | Highly likely |
|--------------------------------------------------------------------------------------------------------------------------------------------|-----------------|---------------------|------------------------|---------|----------------------|-------------------|---------------|
| 13. The commencement of the paroxetine may have resulted in an increase in anxiety for the patient.                                        | 1               | 2                   | 3                      | 4       | 5                    | 6                 | 7             |
| 14. This dose of paroxetine is unlikely to be controlling the patient's anxiety symptoms and an increase in her dose should be considered. | 1               | 2                   | 3                      | 4       | 5                    | 6                 | 7             |
| 15. The paroxetine may have interacted with the tramadol to cause the patient's symptoms.                                                  | 1               | 2                   | 3                      | 4       | 5                    | 6                 | 7             |
| 16. The paroxetine may have interacted with the digoxin to cause the patient's symptoms.                                                   | 1               | 2                   | 3                      | 4       | 5                    | 6                 | 7             |

**Clinical case 5**

A slightly overweight, 78 year-old female patient with a history of hypertension and mild heart failure presents with prescription for furosemide 20 mg daily to treat her swollen ankles. She is also currently taking lercanidipine 20 mg ramipril 2.5 mg daily, plus amitriptyline 10 mg nightly for sleep. Please indicate how likely each drug-related problem would be in this case.

|                                                                                                                    | Highly unlikely | Moderately unlikely | Only slightly unlikely | Neutral | Only slightly likely | Moderately likely | Highly likely |
|--------------------------------------------------------------------------------------------------------------------|-----------------|---------------------|------------------------|---------|----------------------|-------------------|---------------|
| 17. The patient's symptoms are likely to indicate a worsening of her heart failure.                                | 1               | 2                   | 3                      | 4       | 5                    | 6                 | 7             |
| 18. Lercanidipine could be causing peripheral edema.                                                               | 1               | 2                   | 3                      | 4       | 5                    | 6                 | 7             |
| 19. The swollen ankles may be due to an increased fluid intake resulting from hyperglycemia.                       | 1               | 2                   | 3                      | 4       | 5                    | 6                 | 7             |
| 20. The patient may have syndrome of inappropriate antidiuretic hormone secretion which has led to swollen ankles. | 1               | 2                   | 3                      | 4       | 5                    | 6                 | 7             |

**Clinical case 6**

A woman comes into the pharmacy to collect her elderly husband's prescriptions for him while he is recuperating at home. She states there is a new prescription for 'Imdur (isosorbide mononitrate) 60 mg in the morning' that was started in the hospital last week. The new medication doesn't seem to be working and her husband is still experiencing chest pain. The husband's history shows regular dispensing of pantoprazole 40 mg nightly, clopidogrel 75 mg in the morning, atorvastatin 20 mg nightly, Duride (isosorbide mononitrate) 60 mg nightly, perindopril 5 mg and tiotropium 18 µg in the morning and glyceril trinitrate spray p.r.n. Please indicate how likely each drug-related problem would be in this case.

|                                                                                                                                                                              | Highly unlikely | Moderately unlikely | Only slightly unlikely | Neutral | Only slightly likely | Moderately likely | Highly likely |
|------------------------------------------------------------------------------------------------------------------------------------------------------------------------------|-----------------|---------------------|------------------------|---------|----------------------|-------------------|---------------|
| 21. Her husband may be experiencing a decrease in symptom control for his chronic obstructive pulmonary disease and his shortness of breath is causing the chest pain.       | 1               | 2                   | 3                      | 4       | 5                    | 6                 | 7             |
| 22. Her husband may be experiencing nitrate tolerance if he has continued to take the Duride brand that he was initially prescribed, as well as the Imdur from the hospital. | 1               | 2                   | 3                      | 4       | 5                    | 6                 | 7             |
| 23. Her husband should have aspirin added to decrease his chest pain symptoms.                                                                                               | 1               | 2                   | 3                      | 4       | 5                    | 6                 | 7             |

**Instructions: Clinical cases 7 – 9.**

For each of the proposed statements, please indicate how appropriate it is for each clinical case, by circling the appropriate number on 7-point scale (higher number indicates higher appropriateness).

**Clinical case 7**

A slightly overweight, 70-year-old male patient is currently taking warfarin (dose is 5 mg/4 mg on alternate days). He has a dental prescription for an abscess for amoxicillin 500 mg three times a day and metronidazole 400 mg three times a day. Please indicate how appropriate each recommendation would be in this case.

|                                                                                                                                                         | Totally inappropriate | Moderately inappropriate | Only slightly inappropriate | Neutral | Only slightly appropriate | Moderately appropriate | Very appropriate |
|---------------------------------------------------------------------------------------------------------------------------------------------------------|-----------------------|--------------------------|-----------------------------|---------|---------------------------|------------------------|------------------|
| 24. Cease the warfarin while taking the antibiotics.                                                                                                    | 1                     | 2                        | 3                           | 4       | 5                         | 6                      | 7                |
| 25. Discuss the interaction with the patient and recommend an increase in international normalised ratio (INR) monitoring while taking the antibiotics. | 1                     | 2                        | 3                           | 4       | 5                         | 6                      | 7                |
| 26. Discuss the signs and symptoms of an increased INR with the patient.                                                                                | 1                     | 2                        | 3                           | 4       | 5                         | 6                      | 7                |
| 27. Recommend ibuprofen for pain relief for the dental abscess.                                                                                         | 1                     | 2                        | 3                           | 4       | 5                         | 6                      | 7                |
| 28. Halve the warfarin dose while taking the antibiotics.                                                                                               | 1                     | 2                        | 3                           | 4       | 5                         | 6                      | 7                |
| 29. Change the warfarin to aspirin while using the antibiotics.                                                                                         | 1                     | 2                        | 3                           | 4       | 5                         | 6                      | 7                |

1  
2  
3  
4  
5  
6  
7  
8  
9  
10  
11  
12  
13  
14  
15  
16  
17  
18  
19  
20  
21  
22  
23  
24  
25  
26  
27  
28  
29  
30  
31  
32  
33  
34  
35  
36  
37  
38  
39  
40  
41  
42  
43  
44  
45  
46  
47  
48  
49  
50  
51  
52  
53  
54  
55  
56  
57  
58  
59  
60**Clinical case 8**

A 65 year-old female with airways disease has a recent dispensing history containing Seretide 250/25 (two puffs twice a day and Ventolin inhaler (1–2 p.r.n.). She presents a 3-monthhold prescription to the pharmacist for prednisolone 25 mg, which reads '25 mg twice a day for three days, then 12.5 mg twice a day for three days'. On further discussion, the pharmacist determines that the patient is currently experiencing a worsening of the respiratory symptoms and is unsure what dose of prednisolone she should be taking. Please indicate how appropriate each recommendation would be in this case.

|                                                                                                                                       | Totally inappropriate | Moderately inappropriate | Only slightly inappropriate | Neutral | Only slightly appropriate | Moderately appropriate | Very appropriate |
|---------------------------------------------------------------------------------------------------------------------------------------|-----------------------|--------------------------|-----------------------------|---------|---------------------------|------------------------|------------------|
| 30. Advise the patient not to take the prednisolone 25 mg at all.                                                                     | 1                     | 2                        | 3                           | 4       | 5                         | 6                      | 7                |
| 31. Commence over-the-counter pantoprazole 20 mg daily to decrease the risk of gastrointestinal bleeds while taking the prednisolone. | 1                     | 2                        | 3                           | 4       | 5                         | 6                      | 7                |
| 32. Contact the patient's general practitioner and determine what prednisolone dose she should currently be taking.                   | 1                     | 2                        | 3                           | 4       | 5                         | 6                      | 7                |
| 33. Advise the patient to cease the Seretide while she is taking the prednisolone tablets.                                            | 1                     | 2                        | 3                           | 4       | 5                         | 6                      | 7                |
| 34. Advise the patient to increase the use of her Ventolin inhaler in preference to using the prednisolone.                           | 1                     | 2                        | 3                           | 4       | 5                         | 6                      | 7                |

**Clinical case 9**

120 kg, 40-year-old male smoker with osteoarthritis is taking esomeprazole 40 mg daily, but currently has no gastrointestinal symptoms. The only other medication he is currently taking is regular paracetamol for his osteoarthritis pain that he buys over the counter, and his dispensing history shows ketoprofen and cephalexin dispensed several months ago. Please indicate how appropriate each recommendation would be in this case.

|                                                                                                                          | Totally inappropriate | Moderately inappropriate | Only slightly inappropriate | Neutral | Only slightly appropriate | Moderately appropriate | Very appropriate |
|--------------------------------------------------------------------------------------------------------------------------|-----------------------|--------------------------|-----------------------------|---------|---------------------------|------------------------|------------------|
| 35. Recommend the patient return to the general practitioner to reduce his dose to 20 mg daily.                          | 1                     | 2                        | 3                           | 4       | 5                         | 6                      | 7                |
| 36. Recommend the patient return to the general practitioner to trial using esomeprazole on a p.r.n. basis.              | 1                     | 2                        | 3                           | 4       | 5                         | 6                      | 7                |
| 37. Discuss a weight management programme with the patient.                                                              | 1                     | 2                        | 3                           | 4       | 5                         | 6                      | 7                |
| 38. Discuss smoking cessation with the patient.                                                                          | 1                     | 2                        | 3                           | 4       | 5                         | 6                      | 7                |
| 39. Recommend the patient have his vitamin B12 levels checked.                                                           | 1                     | 2                        | 3                           | 4       | 5                         | 6                      | 7                |
| 40. Recommend the patient stop the regular paracetamol and change back to ketoprofen to control his osteoarthritis pain. | 1                     | 2                        | 3                           | 4       | 5                         | 6                      | 7                |

*Disclaimer: All clinical cases are fictional, they do not represent real patients, and were made for the purpose of clinical knowledge measurement tool about drug-related problems.*

1-male  
2-female

CORRECT ANSWERS:

7 7 7 7 7 7 7 7 7 7 7 7 6 6 1 7 1 6 7 2 3 5 7 1 1 7 7 1 1 1 1 1 1 7 1 1 1 7 7 6 6

CLINICAL CASES - PARTICIPANTS' ANSWERS (PRE-WORKSHOP)

| N  | PAIRING CODE | GENDER | AGE (years) | ANSWERS |   |   |   |   |   |   |   |   |    |    |    |    |    |    |    |    |    |    |    |    |    |    |    |    |    |    |    |    |    |    |    |    |    |    |    |    |    |   |   |   |   |   |
|----|--------------|--------|-------------|---------|---|---|---|---|---|---|---|---|----|----|----|----|----|----|----|----|----|----|----|----|----|----|----|----|----|----|----|----|----|----|----|----|----|----|----|----|----|---|---|---|---|---|
|    |              |        |             | 1       | 2 | 3 | 4 | 5 | 6 | 7 | 8 | 9 | 10 | 11 | 12 | 13 | 14 | 15 | 16 | 17 | 18 | 19 | 20 | 21 | 22 | 23 | 24 | 25 | 26 | 27 | 28 | 29 | 30 | 31 | 32 | 33 | 34 | 35 | 36 | 37 | 38 |   |   |   |   |   |
| 1  | IOB          | 2      | 33          | 6       | 4 | 7 | 3 | 4 | 5 | 7 | 6 | 4 | 7  | 7  | 7  | 7  | 7  | 5  | 14 | 3  | 6  | 6  | 7  | 5  | 2  | 7  | 7  | 1  | 5  | 7  | 7  | 1  | 6  | 5  | 7  | 4  | 1  | 1  | 1  | 3  | 5  | 7 | 7 | 6 | 6 |   |
| 2  | IOB          | 2      | 33          | 6       | 6 | 7 | 7 | 7 | 7 | 5 | 7 | 6 | 7  | 6  | 6  | 4  | 5  | 5  | 5  | 5  | 6  | 5  | 5  | 5  | 6  | 6  | 4  | 4  | 7  | 7  | 2  | 2  | 1  | 3  | 5  | 7  | 3  | 1  | 7  | 4  | 6  | 6 | 6 |   |   |   |
| 3  | ZIO          | 2      | 37          | 7       | 5 | 7 | 7 | 7 | 7 | 7 | 7 | 7 | 7  | 7  | 7  | 1  | 7  | 4  | 6  | 6  | 1  | 4  | 6  | 6  | 4  | 1  | 7  | 7  | 1  | 1  | 1  | 1  | 7  | 7  | 1  | 1  | 1  | 7  | 7  | 1  | 4  | 7 | 7 | 7 |   |   |
| 4  | MPS          | 2      | 29          | 7       | 6 | 2 | 6 | 7 | 6 | 4 | 5 | 7 | 2  | 4  | 1  | 5  | 5  | 3  | 3  | 5  | 5  | 3  | 4  | 5  | 6  | 4  | 4  | 5  | 7  | 7  | 7  | 6  | 4  | 2  | 6  | 4  | 2  | 6  | 4  | 7  | 2  | 1 | 6 | 4 | 7 | 7 |
| 5  | DO5          | 2      | 29          | 7       | 4 | 7 | 7 | 7 | 7 | 7 | 7 | 7 | 7  | 7  | 7  | 7  | 5  | 7  | 4  | 6  | 6  | 7  | 7  | 7  | 5  | 6  | 4  | 1  | 7  | 7  | 1  | 7  | 1  | 7  | 1  | 5  | 5  | 4  | 4  | 4  | 6  | 1 | 7 | 7 | 7 |   |
| 6  | MPM          | 2      | 29          | 7       | 5 | 5 | 7 | 7 | 7 | 7 | 7 | 7 | 7  | 7  | 7  | 7  | 6  | 6  | 5  | 4  | 6  | 6  | 6  | 6  | 6  | 6  | 4  | 7  | 7  | 1  | 5  | 4  | 5  | 5  | 5  | 5  | 3  | 3  | 5  | 5  | 7  | 7 | 7 | 7 | 7 |   |
| 7  | DPA          | 2      | 38          | 7       | 7 | 7 | 7 | 7 | 6 | 7 | 7 | 7 | 7  | 7  | 7  | 7  | 6  | 6  | 7  | 6  | 6  | 5  | 5  | 6  | 4  | 1  | 6  | 6  | 2  | 5  | 2  | 7  | 7  | 6  | 2  | 6  | 6  | 2  | 6  | 6  | 6  | 6 | 6 | 6 |   |   |
| 8  | BLM          | 2      | 27          | 3       | 7 | 7 | 7 | 7 | 7 | 1 | 7 | 7 | 7  | 7  | 7  | 7  | 3  | 2  | 2  | 6  | 4  | 1  | 1  | 4  | 7  | 1  | 1  | 6  | 7  | 1  | 1  | 1  | 6  | 4  | 7  | 4  | 1  | 5  | 7  | 7  | 7  | 7 | 7 | 7 |   |   |
| 9  | MDI          | 2      | 35          | 2       | 7 | 7 | 7 | 7 | 6 | 4 | 7 | 7 | 6  | 5  | 4  | 7  | 5  | 6  | 7  | 6  | 5  | 2  | 4  | 4  | 7  | 2  | 2  | 6  | 7  | 1  | 1  | 1  | 7  | 1  | 4  | 1  | 1  | 5  | 7  | 7  | 7  | 7 | 7 | 7 |   |   |
| 10 | SB8          | 2      | 34          | 2       | 7 | 7 | 7 | 7 | 5 | 2 | 7 | 5 | 3  | 3  | 6  | 5  | 6  | 7  | 7  | 6  | 5  | 6  | 7  | 5  | 6  | 6  | 4  | 3  | 5  | 3  | 2  | 2  | 7  | 1  | 1  | 1  | 1  | 6  | 6  | 6  | 7  | 7 | 7 | 7 |   |   |
| 11 | JPB          | 2      | 38          | 7       | 7 | 6 | 7 | 7 | 7 | 4 | 4 | 5 | 7  | 6  | 6  | 6  | 7  | 4  | 6  | 7  | 6  | 6  | 3  | 5  | 5  | 5  | 1  | 2  | 6  | 6  | 1  | 1  | 2  | 7  | 1  | 7  | 3  | 6  | 7  | 7  | 7  | 7 | 7 | 7 |   |   |
| 12 | UB           | 2      | 38          | 6       | 6 | 5 | 7 | 7 | 7 | 4 | 5 | 7 | 7  | 6  | 6  | 6  | 6  | 6  | 6  | 6  | 7  | 5  | 6  | 6  | 6  | 6  | 7  | 5  | 7  | 7  | 7  | 6  | 1  | 7  | 7  | 2  | 1  | 4  | 2  | 7  | 7  | 7 | 7 | 7 |   |   |
| 13 | ALV          | 2      | 29          | 5       | 7 | 7 | 6 | 7 | 7 | 4 | 6 | 7 | 7  | 7  | 7  | 3  | 3  | 7  | 2  | 6  | 4  | 4  | 4  | 5  | 5  | 2  | 1  | 7  | 7  | 2  | 1  | 1  | 7  | 7  | 3  | 1  | 5  | 2  | 7  | 7  | 7  | 7 | 7 | 7 |   |   |
| 14 | BGV          | 2      | 39          | 7       | 7 | 7 | 7 | 7 | 7 | 7 | 7 | 7 | 6  | 7  | 6  | 7  | 5  | 1  | 6  | 6  | 6  | 6  | 4  | 4  | 1  | 7  | 4  | 5  | 7  | 7  | 1  | 5  | 2  | 5  | 6  | 7  | 7  | 1  | 1  | 6  | 6  | 5 | 5 | 5 |   |   |
| 15 | VJM          | 2      | 35          | 7       | 5 | 6 | 7 | 7 | 6 | 4 | 5 | 7 | 7  | 7  | 6  | 4  | 2  | 3  | 5  | 6  | 3  | 6  | 4  | 7  | 4  | 1  | 1  | 1  | 7  | 1  | 2  | 1  | 1  | 7  | 6  | 2  | 2  | 2  | 7  | 6  | 6  | 6 | 6 | 6 |   |   |
| 16 | JMB          | 2      | 34          | 7       | 7 | 7 | 7 | 7 | 7 | 7 | 7 | 7 | 7  | 7  | 7  | 7  | 2  | 2  | 5  | 5  | 6  | 7  | 2  | 2  | 2  | 6  | 6  | 1  | 1  | 7  | 7  | 2  | 5  | 1  | 4  | 6  | 6  | 2  | 2  | 7  | 2  | 7 | 7 | 7 |   |   |
| 17 | ZCZ          | 1      | 28          | 6       | 5 | 7 | 7 | 7 | 7 | 7 | 5 | 7 | 7  | 5  | 5  | 6  | 2  | 6  | 6  | 4  | 6  | 5  | 3  | 6  | 6  | 2  | 2  | 7  | 7  | 1  | 6  | 4  | 6  | 3  | 7  | 3  | 2  | 5  | 4  | 6  | 6  | 6 | 6 | 6 |   |   |
| 18 | RBA          | 2      | 39          | 6       | 6 | 6 | 6 | 7 | 7 | 6 | 6 | 7 | 7  | 6  | 6  | 6  | 6  | 7  | 7  | 6  | 5  | 3  | 4  | 4  | 7  | 1  | 3  | 7  | 7  | 1  | 5  | 1  | 3  | 5  | 7  | 1  | 1  | 5  | 6  | 6  | 6  | 6 | 6 | 6 |   |   |
| 19 | KMP          | 2      | 25          | 2       | 6 | 6 | 6 | 7 | 6 | 2 | 7 | 7 | 6  | 5  | 6  | 7  | 3  | 5  | 5  | 6  | 6  | 2  | 2  | 5  | 4  | 3  | 6  | 7  | 7  | 3  | 4  | 4  | 2  | 5  | 7  | 3  | 4  | 7  | 6  | 6  | 6  | 6 | 6 | 6 |   |   |
| 20 | SUJ          | 2      | 54          | 6       | 5 | 6 | 7 | 6 | 4 | 4 | 5 | 4 | 5  | 4  | 2  | 5  | 2  | 2  | 6  | 6  | 5  | 5  | 2  | 1  | 7  | 1  | 6  | 7  | 5  | 1  | 4  | 5  | 7  | 2  | 5  | 7  | 2  | 5  | 1  | 5  | 6  | 3 | 6 | 6 | 6 |   |
| 21 | LXB          | 2      | 52          | 6       | 4 | 7 | 6 | 7 | 6 | 7 | 5 | 7 | 7  | 7  | 7  | 7  | 1  | 6  | 5  | 6  | 2  | 3  | 3  | 5  | 6  | 5  | 3  | 7  | 7  | 3  | 2  | 1  | 2  | 3  | 7  | 6  | 2  | 6  | 3  | 7  | 7  | 7 | 7 | 7 |   |   |
| 22 | DRM          | 2      | 37          | 6       | 5 | 4 | 6 | 6 | 6 | 6 | 5 | 5 | 5  | 5  | 6  | 2  | 6  | 6  | 4  | 6  | 5  | 3  | 6  | 5  | 5  | 6  | 5  | 4  | 6  | 6  | 4  | 6  | 5  | 5  | 5  | 5  | 5  | 5  | 5  | 5  | 5  | 5 | 5 | 5 | 5 | 5 |
| 23 | ADA          | 2      | 25          | 5       | 6 | 7 | 7 | 7 | 7 | 7 | 7 | 7 | 7  | 7  | 7  | 7  | 1  | 4  | 4  | 7  | 7  | 7  | 7  | 6  | 5  | 6  | 6  | 1  | 5  | 7  | 7  | 1  | 5  | 6  | 3  | 7  | 7  | 1  | 5  | 6  | 5  | 7 | 7 | 7 | 7 |   |
| 24 | VNZ          | 2      | 36          | 6       | 4 | 7 | 3 | 7 | 5 | 4 | 6 | 7 | 7  | 7  | 7  | 7  | 5  | 11 | 4  | 6  | 6  | 6  | 6  | 4  | 1  | 7  | 7  | 1  | 5  | 7  | 7  | 1  | 6  | 5  | 7  | 2  | 1  | 1  | 7  | 2  | 1  | 5 | 5 | 6 | 7 | 7 |
| 25 | ZPS          | 1      | 33          | 7       | 6 | 6 | 6 | 6 | 6 | 7 | 6 | 6 | 7  | 4  | 7  | 7  | 5  | 1  | 4  | 5  | 6  | 6  | 5  | 4  | 6  | 5  | 6  | 1  | 7  | 5  | 1  | 2  | 1  | 1  | 6  | 6  | 1  | 1  | 6  | 6  | 6  | 6 | 6 | 6 | 6 |   |
| 26 | KGI          | 2      | 28          | 7       | 6 | 7 | 7 | 6 | 7 | 6 | 6 | 7 | 6  | 7  | 6  | 6  | 5  | 7  | 6  | 6  | 6  | 6  | 6  | 4  | 6  | 7  | 4  | 1  | 6  | 6  | 3  | 1  | 1  | 6  | 4  | 7  | 1  | 1  | 5  | 5  | 6  | 6 | 6 | 6 | 6 |   |
| 27 | DUR          | 2      | 52          | 7       | 7 | 5 | 7 | 7 | 7 | 1 | 4 | 7 | 7  | 7  | 7  | 1  | 1  | 7  | 1  | 1  | 3  | 4  | 1  | 4  | 7  | 1  | 1  | 6  | 4  | 1  | 1  | 1  | 7  | 7  | 7  | 1  | 1  | 7  | 7  | 1  | 1  | 7 | 1 | 7 | 7 | 7 |
| 28 | DMM          | 2      | 53          | 7       | 7 | 7 | 7 | 6 | 7 | 6 | 7 | 6 | 6  | 6  | 6  | 7  | 5  | 6  | 6  | 6  | 5  | 7  | 4  | 4  | 6  | 4  | 6  | 4  | 2  | 7  | 7  | 1  | 1  | 7  | 7  | 1  | 7  | 1  | 7  | 1  | 4  | 4 | 4 | 5 | 7 |   |
| 29 | ZPT          | 2      | 45          | 7       | 7 | 7 | 7 | 7 | 7 | 7 | 7 | 7 | 7  | 7  | 7  | 7  | 7  | 7  | 7  | 6  | 7  | 6  | 7  | 6  | 7  | 3  | 4  | 6  | 6  | 7  | 2  | 2  | 7  | 3  | 7  | 3  | 7  | 1  | 1  | 6  | 6  | 7 | 7 | 7 |   |   |
| 30 | AGB          | 2      | 37          | 7       | 4 | 7 | 6 | 7 | 7 | 1 | 6 | 7 | 5  | 5  | 6  | 1  | 4  | 7  | 4  | 7  | 5  | 2  | 5  | 5  | 3  | 2  | 7  | 7  | 1  | 2  | 1  | 4  | 4  | 7  | 3  | 2  | 5  | 5  | 7  | 7  | 7  | 7 | 7 | 7 | 7 |   |
| 31 | MKJ          | 2      | 58          | 7       | 3 | 6 | 7 | 7 | 7 | 1 | 5 | 7 | 6  | 6  | 4  | 6  | 1  | 6  | 4  | 6  | 7  | 1  | 6  | 5  | 1  | 1  | 1  | 4  | 4  | 1  | 1  | 1  | 7  | 1  | 4  | 7  | 1  | 1  | 1  | 5  | 1  | 5 | 1 | 7 | 7 | 7 |
| 32 | CBB          | 2      | 26          | 6       | 6 | 7 | 7 | 7 | 4 | 4 | 4 | 4 | 5  | 7  | 4  | 7  | 3  | 4  | 5  | 3  | 5  | 4  | 4  | 5  | 5  | 6  | 4  | 3  | 7  | 7  | 1  | 5  | 3  | 4  | 5  | 5  | 1  | 1  | 2  | 5  | 4  | 6 | 6 | 6 | 6 |   |
| 33 | LET          | 2      | 30          | 6       | 6 | 6 | 7 | 7 | 7 | 5 | 6 | 7 | 5  | 6  | 6  | 6  | 6  | 6  | 6  | 6  | 5  | 5  | 6  | 5  | 5  | 6  | 4  | 3  | 6  | 6  | 1  | 3  | 1  | 4  | 6  | 5  | 5  | 4  | 5  | 4  | 6  | 6 | 6 | 6 | 6 |   |
| 34 | ASZ          | 2      | 32          | 6       | 7 | 7 | 7 | 7 | 7 | 7 | 7 | 7 | 7  | 7  | 7  | 7  | 7  | 7  | 6  | 6  | 6  | 6  | 6  | 6  | 5  | 4  | 1  | 7  | 1  | 1  | 1  | 7  | 1  | 4  | 1  | 1  | 1  | 4  | 1  | 4  | 4  | 4 | 4 | 4 | 4 | 4 |
| 35 | MMN          | 2      | 29          | 7       | 5 | 4 | 7 | 7 | 4 | 3 | 3 | 4 | 6  | 5  | 5  | 6  | 2  | 5  | 5  | 6  | 4  | 3  | 6  | 7  | 4  | 4  | 6  | 6  | 3  | 4  | 4  | 4  | 5  | 7  | 4  | 4  | 5  | 7  | 4  | 4  | 6  | 7 | 5 | 6 | 6 | 6 |
| 36 | SMA          | 2      | 52          | 5       | 5 | 5 | 7 | 6 | 6 | 7 | 6 | 7 | 7  | 7  | 7  | 7  | 7  | 6  | 6  | 3  | 5  | 1  | 1  | 7  | 1  | 1  | 1  | 7  | 7  | 1  | 1  | 1  | 5  | 5  | 7  | 7  | 1  | 1  | 5  | 5  | 7  | 7 | 7 | 7 | 7 | 7 |
| 37 | IRD          | 2      | 53          | 7       | 6 | 6 | 7 | 7 | 6 | 2 | 7 | 4 | 5  | 7  | 7  | 6  | 4  | 4  | 6  | 7  | 5  | 4  | 4  | 6  | 7  | 4  | 1  | 7  | 7  | 4  | 4  | 1  | 1  | 7  | 7  | 1  | 1  | 7  | 7  | 1  | 1  | 7 | 1 | 6 | 7 | 7 |
| 38 | IAN          | 2      | 41          | 7       | 6 | 6 | 7 | 7 | 7 | 7 | 7 | 7 | 7  | 7  | 7  | 7  | 6  | 2  | 2  | 6  | 6  | 6  | 2  | 6  | 6  | 1  | 7  | 1  | 1  | 7  | 7  | 1  | 1  | 1  | 7  | 7  | 1  | 1  | 1  | 1  | 7  | 1 | 7 | 7 | 7 | 7 |
| 39 | WAN          | 2      | 28          | 6       | 6 | 7 | 7 | 7 | 7 | 7 | 7 | 7 | 7  | 7  | 7  | 7  | 7  | 3  | 5  | 7  | 3  | 7  | 6  | 2  | 6  | 7  | 6  | 2  | 5  | 7  | 7  | 1  | 5  | 4  | 2  | 5  | 7  | 3  | 4  | 5  | 7  | 7 | 7 | 7 | 7 |   |
| 40 | ADL          | 2      | 46          | 7       | 4 | 7 | 7 | 7 | 7 | 4 | 7 | 7 | 7  | 7  | 7  | 7  | 7  | 4  | 4  | 4  | 7  | 4  | 4  | 7  | 4  | 4  | 4  | 4  | 4  | 7  | 7  | 1  | 4  | 4  | 4  | 7  | 7  | 4  | 1  | 7  | 4  | 7 | 7 | 7 | 7 | 7 |
| 41 | TTL          | 2      | 36          | 3       | 4 | 3 | 4 | 4 | 3 | 3 | 5 | 7 | 7  | 7  | 6  | 4  | 2  | 3  | 5  | 6  | 3  | 6  | 4  | 7  | 4  | 4  | 1  | 1  | 1  | 7  | 1  | 2  | 1  | 1  | 7  | 6  | 2  | 2  | 2  | 7  | 4  | 7 | 6 | 6 | 6 | 6 |
| 42 | RPB          | 2      | 42          | 1       | 7 | 5 | 4 | 7 | 5 | 7 | 6 | 5 | 7  | 7  | 7  |    |    |    |    |    |    |    |    |    |    |    |    |    |    |    |    |    |    |    |    |    |    |    |    |    |    |   |   |   |   |   |









1  
2  
3  
4  
5  
6  
7  
8  
9  
10  
11  
12  
13  
14  
15  
16  
17  
18  
19  
20  
21  
22  
23  
24  
25  
26  
27  
28  
29  
30  
31  
32  
33  
34  
35  
36  
37  
38  
39  
40  
41  
42  
43  
44  
45  
46

40

**SURVEY SCORE (POST)**

|    |
|----|
| 47 |
| 61 |
| 45 |
| 46 |
| 46 |
| 45 |
| 46 |
| 51 |
| 47 |
| 37 |
| 54 |
| 39 |
| 43 |
| 52 |
| 39 |
| 55 |
| 50 |
| 52 |
| 53 |
| 30 |
| 49 |
| 55 |
| 53 |
| 37 |
| 46 |
| 55 |
| 48 |
| 51 |
| 55 |
| 45 |
| 54 |
| 59 |
| 26 |
| 61 |
| 36 |
| 45 |
| 41 |
| 61 |
| 57 |
| 51 |
| 37 |
| 49 |
| 40 |
| 59 |
| 67 |
| 40 |
| 42 |
| 44 |
| 46 |
| 49 |
| 40 |
| 48 |
| 60 |
| 39 |
| 59 |
| 40 |
| 39 |
| 58 |
| 44 |
| 45 |
| 54 |
| 53 |
| 42 |
| 43 |
| 58 |
| 48 |
| 47 |
| 50 |
| 56 |
| 66 |
| 61 |
| 57 |
| 44 |
| 36 |
| 55 |
| 56 |
| 58 |
| 57 |
| 58 |
| 61 |
| 46 |
| 59 |
| 45 |
| 46 |
| 49 |
| 53 |
| 51 |
| 52 |

For peer review only
