# Supplementary material for: Improving community pharmacists’ clinical knowledge to detect and resolve drug-related problems in Croatia: a before/after survey study investigating the efficacy of an educational intervention
Source: PubMed Central journal article supplement — BMJ Open. 2020 Jun 1;10(6):e034674. doi: 10.1136/bmjopen-2019-034674 (PMC7265009; doi:10.1136/bmjopen-2019-034674), 2020-06-01
Supplement: bmjopen-2019-034674supp002.pdf [file bmjopen-2019-034674supp002.pdf]

1: male  
2: female

**CORRECT ANSWERS:**

7 7 7 7 7 7 7 7 7 7 7 7 6 6 1 7 1 6 7 2 3 5 7 1 1 7 7 1 1 1 1 1 1 7 1 1 1 7 7 6 6

**CLINICAL CASES - PARTICIPANTS' ANSWERS (PRE-WORKSHOP)**

| N  | PAIRING CODE | GENDER | AGE (years) | Answers (1-7) |   |   |   |   |   |   |   |   |    |    |    |    |    |    |    |    |    |    |    |    |    |    |    |    |    |    |    |    |    |    |    |    |    |    |    |    |    |   |   |   |   |
|----|--------------|--------|-------------|---------------|---|---|---|---|---|---|---|---|----|----|----|----|----|----|----|----|----|----|----|----|----|----|----|----|----|----|----|----|----|----|----|----|----|----|----|----|----|---|---|---|---|
|    |              |        |             | 1             | 2 | 3 | 4 | 5 | 6 | 7 | 8 | 9 | 10 | 11 | 12 | 13 | 14 | 15 | 16 | 17 | 18 | 19 | 20 | 21 | 22 | 23 | 24 | 25 | 26 | 27 | 28 | 29 | 30 | 31 | 32 | 33 | 34 | 35 | 36 | 37 | 38 |   |   |   |   |
| 1  | ICB          | 2      | 33          | 6             | 4 | 7 | 3 | 7 | 7 | 6 | 4 | 7 | 7  | 7  | 7  | 7  | 5  | 1  | 3  | 6  | 6  | 7  | 5  | 2  | 7  | 7  | 1  | 5  | 7  | 7  | 1  | 6  | 5  | 7  | 4  | 1  | 1  | 1  | 3  | 5  | 7  | 7 |   |   |   |
| 2  | ICB          | 2      | 33          | 6             | 6 | 7 | 7 | 7 | 7 | 5 | 7 | 6 | 7  | 6  | 6  | 4  | 5  | 5  | 6  | 5  | 5  | 6  | 5  | 2  | 5  | 6  | 4  | 4  | 7  | 7  | 2  | 2  | 1  | 3  | 5  | 7  | 3  | 1  | 7  | 4  | 6  | 6 |   |   |   |
| 3  | ZJD          | 2      | 37          | 7             | 5 | 7 | 7 | 7 | 7 | 7 | 7 | 7 | 7  | 7  | 7  | 1  | 7  | 4  | 6  | 6  | 1  | 4  | 6  | 6  | 4  | 1  | 7  | 7  | 1  | 1  | 1  | 1  | 7  | 7  | 1  | 1  | 4  | 7  | 7  | 7  | 7  |   |   |   |   |
| 4  | MPS          | 2      | 29          | 7             | 6 | 2 | 6 | 7 | 6 | 4 | 5 | 7 | 2  | 4  | 1  | 5  | 5  | 3  | 3  | 5  | 5  | 3  | 4  | 5  | 6  | 4  | 5  | 7  | 7  | 7  | 6  | 4  | 2  | 6  | 7  | 2  | 1  | 6  | 4  | 7  | 7  |   |   |   |   |
| 5  | DOS          | 2      | 29          | 7             | 4 | 7 | 7 | 7 | 7 | 7 | 7 | 7 | 7  | 7  | 7  | 5  | 7  | 4  | 6  | 6  | 7  | 7  | 7  | 5  | 6  | 4  | 1  | 7  | 7  | 1  | 7  | 1  | 5  | 5  | 4  | 4  | 4  | 6  | 1  | 7  | 7  |   |   |   |   |
| 6  | MMA          | 2      | 29          | 7             | 5 | 5 | 7 | 7 | 7 | 7 | 7 | 7 | 7  | 7  | 7  | 6  | 6  | 5  | 4  | 6  | 6  | 6  | 6  | 6  | 6  | 4  | 7  | 7  | 1  | 5  | 4  | 5  | 5  | 3  | 3  | 5  | 5  | 7  | 7  | 7  |    |   |   |   |   |
| 7  | DPA          | 2      | 38          | 7             | 7 | 7 | 7 | 7 | 7 | 6 | 7 | 7 | 7  | 7  | 7  | 7  | 6  | 6  | 7  | 6  | 6  | 5  | 5  | 5  | 6  | 4  | 1  | 6  | 6  | 2  | 5  | 2  | 7  | 7  | 6  | 2  | 6  | 6  | 6  | 6  | 6  |   |   |   |   |
| 8  | BLM          | 2      | 27          | 3             | 7 | 7 | 7 | 7 | 7 | 1 | 7 | 7 | 7  | 7  | 7  | 7  | 3  | 2  | 2  | 6  | 4  | 1  | 1  | 4  | 7  | 1  | 1  | 6  | 7  | 1  | 1  | 1  | 6  | 4  | 7  | 4  | 1  | 5  | 7  | 7  | 7  |   |   |   |   |
| 9  | MDI          | 2      | 35          | 2             | 7 | 7 | 7 | 7 | 6 | 4 | 7 | 7 | 6  | 5  | 4  | 7  | 5  | 6  | 7  | 6  | 5  | 2  | 4  | 4  | 7  | 2  | 2  | 6  | 7  | 1  | 1  | 1  | 7  | 1  | 4  | 1  | 1  | 5  | 7  | 7  | 7  |   |   |   |   |
| 10 | SBB          | 2      | 34          | 2             | 7 | 7 | 7 | 7 | 5 | 2 | 7 | 5 | 3  | 3  | 6  | 5  | 6  | 7  | 6  | 5  | 6  | 6  | 5  | 6  | 4  | 3  | 5  | 3  | 2  | 2  | 2  | 7  | 1  | 1  | 1  | 1  | 6  | 6  | 7  | 7  | 7  |   |   |   |   |
| 11 | JPB          | 2      | 38          | 7             | 7 | 6 | 7 | 7 | 7 | 4 | 5 | 7 | 6  | 6  | 6  | 7  | 4  | 6  | 7  | 6  | 6  | 3  | 5  | 5  | 5  | 1  | 2  | 7  | 6  | 1  | 1  | 2  | 7  | 1  | 7  | 3  | 6  | 7  | 7  | 7  | 7  |   |   |   |   |
| 12 | LB           | 2      | 38          | 6             | 6 | 5 | 7 | 7 | 7 | 4 | 5 | 7 | 7  | 6  | 6  | 6  | 6  | 6  | 6  | 6  | 6  | 6  | 6  | 6  | 6  | 7  | 5  | 7  | 7  | 7  | 6  | 1  | 7  | 7  | 7  | 2  | 1  | 4  | 2  | 7  | 7  |   |   |   |   |
| 13 | ALM          | 2      | 29          | 5             | 7 | 7 | 6 | 7 | 7 | 4 | 6 | 7 | 7  | 7  | 7  | 3  | 3  | 7  | 2  | 6  | 4  | 4  | 5  | 5  | 7  | 2  | 1  | 1  | 7  | 2  | 1  | 1  | 7  | 7  | 3  | 1  | 5  | 2  | 7  | 7  | 7  |   |   |   |   |
| 14 | BGV          | 2      | 39          | 7             | 7 | 7 | 7 | 7 | 7 | 7 | 7 | 7 | 7  | 6  | 7  | 5  | 1  | 6  | 6  | 6  | 6  | 4  | 4  | 1  | 7  | 4  | 5  | 7  | 7  | 1  | 5  | 2  | 5  | 6  | 7  | 1  | 1  | 6  | 6  | 5  | 5  |   |   |   |   |
| 15 | VIM          | 2      | 35          | 7             | 5 | 6 | 7 | 7 | 6 | 4 | 5 | 7 | 7  | 7  | 6  | 4  | 2  | 3  | 5  | 6  | 3  | 6  | 4  | 7  | 4  | 1  | 1  | 1  | 7  | 1  | 2  | 1  | 1  | 7  | 6  | 2  | 2  | 2  | 7  | 6  | 6  |   |   |   |   |
| 16 | AMB          | 2      | 34          | 7             | 7 | 7 | 7 | 7 | 7 | 7 | 7 | 7 | 7  | 7  | 7  | 7  | 2  | 5  | 5  | 6  | 7  | 2  | 2  | 6  | 6  | 1  | 1  | 7  | 7  | 2  | 5  | 1  | 4  | 6  | 6  | 6  | 2  | 2  | 7  | 2  | 7  | 7 |   |   |   |
| 17 | ZZZ          | 1      | 28          | 6             | 5 | 7 | 7 | 7 | 7 | 7 | 5 | 7 | 7  | 5  | 5  | 6  | 2  | 6  | 6  | 4  | 6  | 5  | 3  | 6  | 6  | 2  | 2  | 7  | 7  | 1  | 6  | 4  | 2  | 3  | 7  | 3  | 2  | 2  | 5  | 4  | 6  | 6 |   |   |   |
| 18 | RBA          | 2      | 39          | 6             | 6 | 6 | 6 | 7 | 7 | 6 | 7 | 7 | 7  | 7  | 6  | 6  | 6  | 7  | 7  | 6  | 5  | 3  | 4  | 4  | 7  | 1  | 3  | 7  | 7  | 1  | 5  | 1  | 3  | 5  | 7  | 1  | 1  | 5  | 6  | 6  | 6  | 6 |   |   |   |
| 19 | KMP          | 2      | 35          | 2             | 6 | 6 | 6 | 7 | 6 | 2 | 7 | 7 | 6  | 5  | 6  | 7  | 3  | 5  | 5  | 6  | 6  | 2  | 2  | 5  | 4  | 3  | 6  | 7  | 7  | 3  | 4  | 4  | 2  | 5  | 7  | 3  | 4  | 7  | 6  | 6  | 6  | 6 |   |   |   |
| 20 | SU           | 2      | 54          | 6             | 5 | 6 | 7 | 6 | 4 | 4 | 5 | 4 | 5  | 4  | 2  | 5  | 2  | 2  | 6  | 6  | 5  | 5  | 2  | 1  | 7  | 1  | 6  | 7  | 5  | 1  | 4  | 5  | 7  | 2  | 5  | 1  | 5  | 6  | 3  | 6  | 6  |   |   |   |   |
| 21 | LKB          | 2      | 52          | 6             | 4 | 7 | 6 | 7 | 7 | 7 | 5 | 7 | 7  | 7  | 7  | 7  | 1  | 6  | 5  | 6  | 2  | 3  | 3  | 5  | 6  | 5  | 6  | 3  | 7  | 7  | 3  | 2  | 1  | 2  | 3  | 7  | 6  | 2  | 6  | 3  | 7  | 7 |   |   |   |
| 22 | DRM          | 2      | 37          | 6             | 5 | 4 | 6 | 6 | 6 | 6 | 6 | 5 | 5  | 5  | 5  | 6  | 5  | 6  | 6  | 6  | 5  | 6  | 5  | 6  | 5  | 6  | 5  | 4  | 6  | 6  | 4  | 6  | 5  | 5  | 5  | 6  | 5  | 5  | 5  | 5  | 6  | 6 | 6 |   |   |
| 23 | ADA          | 2      | 25          | 5             | 6 | 7 | 7 | 7 | 7 | 7 | 7 | 7 | 7  | 7  | 7  | 1  | 4  | 4  | 7  | 6  | 5  | 5  | 6  | 6  | 5  | 5  | 6  | 6  | 1  | 5  | 7  | 7  | 1  | 5  | 6  | 3  | 7  | 7  | 2  | 1  | 6  | 5 | 7 | 7 |   |
| 24 | MAZ          | 1      | 36          | 6             | 4 | 7 | 3 | 7 | 7 | 4 | 6 | 7 | 7  | 7  | 5  | 1  | 4  | 6  | 6  | 6  | 4  | 7  | 5  | 1  | 4  | 6  | 6  | 7  | 1  | 6  | 7  | 5  | 1  | 4  | 6  | 7  | 5  | 1  | 1  | 3  | 5  | 6 | 7 | 7 |   |
| 25 | ZPS          | 1      | 33          | 7             | 6 | 6 | 6 | 6 | 7 | 6 | 6 | 7 | 4  | 7  | 7  | 5  | 1  | 4  | 5  | 6  | 6  | 5  | 4  | 6  | 5  | 6  | 1  | 7  | 5  | 1  | 2  | 1  | 1  | 6  | 6  | 6  | 1  | 1  | 6  | 6  | 6  | 6 | 6 |   |   |
| 26 | KGI          | 2      | 28          | 7             | 6 | 7 | 7 | 6 | 7 | 6 | 6 | 7 | 6  | 7  | 6  | 6  | 5  | 7  | 6  | 6  | 6  | 6  | 4  | 6  | 7  | 4  | 1  | 6  | 6  | 3  | 1  | 1  | 6  | 4  | 7  | 1  | 1  | 5  | 5  | 6  | 6  | 6 | 6 |   |   |
| 27 | DLR          | 2      | 52          | 7             | 7 | 5 | 7 | 7 | 7 | 1 | 4 | 7 | 7  | 7  | 7  | 1  | 1  | 7  | 1  | 1  | 3  | 4  | 3  | 4  | 4  | 7  | 1  | 1  | 6  | 4  | 1  | 1  | 7  | 7  | 7  | 1  | 1  | 7  | 7  | 1  | 1  | 7 | 7 |   |   |
| 28 | DMM          | 2      | 53          | 7             | 7 | 7 | 7 | 7 | 7 | 7 | 6 | 6 | 6  | 6  | 6  | 6  | 6  | 6  | 6  | 6  | 6  | 6  | 6  | 6  | 6  | 6  | 6  | 6  | 6  | 6  | 6  | 6  | 6  | 6  | 6  | 6  | 6  | 6  | 6  | 6  | 6  | 6 | 6 |   |   |
| 29 | ZPT          | 2      | 45          | 7             | 7 | 7 | 7 | 7 | 7 | 7 | 7 | 7 | 7  | 6  | 7  | 5  | 7  | 7  | 6  | 7  | 6  | 7  | 6  | 7  | 6  | 7  | 6  | 7  | 3  | 4  | 6  | 6  | 7  | 2  | 2  | 7  | 3  | 7  | 1  | 1  | 6  | 6 | 7 | 7 |   |
| 30 | AGB          | 2      | 37          | 7             | 4 | 7 | 6 | 7 | 7 | 1 | 6 | 7 | 5  | 5  | 5  | 6  | 1  | 4  | 7  | 4  | 7  | 4  | 7  | 5  | 2  | 5  | 5  | 3  | 2  | 7  | 7  | 1  | 2  | 1  | 4  | 4  | 7  | 3  | 2  | 5  | 5  | 7 | 7 | 7 |   |
| 31 | MSJ          | 2      | 58          | 7             | 6 | 7 | 7 | 7 | 7 | 1 | 6 | 4 | 4  | 4  | 4  | 4  | 6  | 6  | 7  | 1  | 6  | 4  | 1  | 6  | 1  | 1  | 1  | 4  | 1  | 1  | 1  | 1  | 4  | 1  | 1  | 1  | 1  | 1  | 1  | 1  | 1  | 1 | 1 | 1 | 1 |
| 32 | CBJ          | 2      | 26          | 6             | 6 | 7 | 7 | 7 | 4 | 4 | 4 | 4 | 5  | 7  | 4  | 7  | 3  | 4  | 5  | 3  | 5  | 4  | 4  | 5  | 4  | 3  | 7  | 7  | 7  | 1  | 5  | 3  | 4  | 4  | 5  | 5  | 1  | 1  | 2  | 5  | 5  | 5 | 5 | 5 |   |
| 33 | LET          | 2      | 30          | 6             | 6 | 6 | 7 | 7 | 7 | 5 | 6 | 7 | 5  | 6  | 6  | 6  | 3  | 6  | 6  | 6  | 5  | 5  | 6  | 5  | 6  | 6  | 3  | 6  | 6  | 1  | 3  | 1  | 4  | 6  | 5  | 5  | 4  | 5  | 4  | 6  | 6  | 6 | 6 |   |   |
| 34 | ASZ          | 2      | 32          | 6             | 7 | 7 | 7 | 7 | 7 | 7 | 7 | 7 | 7  | 7  | 7  | 4  | 4  | 6  | 4  | 6  | 6  | 4  | 5  | 4  | 5  | 1  | 1  | 7  | 7  | 1  | 1  | 1  | 7  | 1  | 4  | 1  | 1  | 4  | 4  | 6  | 6  | 6 | 6 |   |   |
| 35 | MMN          | 2      | 29          | 4             | 7 | 5 | 4 | 7 | 7 | 5 | 4 | 7 | 7  | 6  | 6  | 5  | 4  | 3  | 6  | 7  | 5  | 7  | 5  | 6  | 7  | 4  | 4  | 6  | 6  | 3  | 4  | 4  | 4  | 6  | 6  | 6  | 6  | 6  | 6  | 6  | 6  | 6 | 6 |   |   |
| 36 | SMA          | 2      | 52          | 5             | 5 | 5 | 7 | 7 | 6 | 6 | 7 | 7 | 6  | 7  | 7  | 7  | 6  | 6  | 3  | 5  | 1  | 1  | 7  | 1  | 1  | 1  | 7  | 7  | 1  | 1  | 1  | 5  | 5  | 7  | 7  | 7  | 1  | 4  | 4  | 4  | 7  | 7 | 7 |   |   |
| 37 | IBD          | 2      | 52          | 7             | 6 | 6 | 7 | 7 | 6 | 2 | 7 | 4 | 5  | 7  | 7  | 6  | 4  | 4  | 6  | 7  | 5  | 4  | 4  | 6  | 7  | 4  | 4  | 1  | 7  | 7  | 4  | 4  | 1  | 1  | 7  | 7  | 1  | 1  | 7  | 7  | 1  | 6 | 7 | 7 |   |
| 38 | BU           | 2      | 41          | 6             | 5 | 7 | 5 | 7 | 7 | 6 | 7 | 7 | 7  | 7  | 6  | 5  | 2  | 5  | 3  | 5  | 7  | 5  | 1  | 5  | 7  | 4  | 4  | 7  | 7  | 2  | 6  | 2  | 7  | 1  | 7  | 1  | 1  | 7  | 1  | 1  | 7  | 7 | 7 |   |   |
| 39 | NMN          | 2      | 28          | 7             | 6 | 7 | 7 | 7 | 7 | 7 | 7 | 7 | 7  | 7  | 7  | 7  | 7  | 3  | 5  | 7  | 3  | 5  | 7  | 6  | 2  | 6  | 7  | 7  | 1  | 5  | 4  | 2  | 5  | 7  | 3  | 4  | 5  | 7  | 7  | 7  | 7  | 7 |   |   |   |
| 40 | ADL          | 2      | 46          | 7             | 4 | 7 | 7 | 7 | 7 | 4 | 7 | 7 | 7  | 7  | 7  | 7  | 4  | 4  | 4  | 7  | 4  | 7  | 4  | 4  | 4  | 4  | 4  | 4  | 4  | 4  | 4  | 4  | 4  | 4  | 4  | 4  | 4  | 4  | 4  | 4  | 4  | 4 | 4 | 4 |   |
| 41 | TTL          | 2      | 36          | 3             | 4 | 3 | 4 | 4 | 3 | 3 | 5 | 7 | 7  | 7  | 6  | 4  | 2  | 3  | 5  | 6  | 3  | 6  | 4  | 7  | 4  | 1  | 1  | 1  | 7  | 1  | 2  | 1  | 1  | 7  | 6  | 2  | 2  | 2  | 2  | 7  | 6  | 6 | 6 |   |   |
| 42 | PPB          | 2      | 41          | 1             | 7 | 7 | 5 | 4 | 7 | 7 | 5 | 4 | 7  | 7  | 7  | 7  | 4  | 4  | 7  | 7  | 7  | 4  | 4  | 7  | 4  | 4  | 4  | 4  | 4  | 4  | 4  | 4  | 4  | 4  | 4  | 4  | 4  | 4  | 4  | 4  | 4  | 4 | 4 | 4 |   |
| 43 | APV          | 2      | 41          | 7             | 7 | 5 | 4 | 7 | 6 | 4 | 5 | 6 | 6  | 7  | 6  | 5  | 4  | 4  | 6  | 5  | 4  | 3  | 7  | 5  | 7  | 4  | 4  | 4  | 5  | 3  | 5  | 4  | 3  | 5  | 7  | 3  | 2  | 5  | 3  | 7  | 7  | 7 | 7 | 7 |   |
| 44 | BMN          | 2      | 31          | 6             | 6 | 7 | 7 | 7 | 7 | 6 | 6 | 7 | 7  | 7  | 6  | 3  | 3  | 4  | 6  | 6  | 5  | 5  | 3  |    |    |    |    |    |    |    |    |    |    |    |    |    |    |    |    |    |    |   |   |   |   |

|   |   |
|---|---|
| 4 | 1 |
|---|---|

|    |    |
|----|----|
| 39 | 40 |
|----|----|

| SCORING (2 - CORRECT ANSWER, 1 - ADJACENT ANSWER; 0 - ALL OTHER ANSWERS) |   |   |   |   |   |   |   |   |   |    |    |    |    |    |    |    |    |    |    |    |    |    |    |    |    |    |    |    |    |    |    |    |    |    |    |    |    |    |    |    |   |
|--------------------------------------------------------------------------|---|---|---|---|---|---|---|---|---|----|----|----|----|----|----|----|----|----|----|----|----|----|----|----|----|----|----|----|----|----|----|----|----|----|----|----|----|----|----|----|---|
|                                                                          | 1 | 2 | 3 | 4 | 5 | 6 | 7 | 8 | 9 | 10 | 11 | 12 | 13 | 14 | 15 | 16 | 17 | 18 | 19 | 20 | 21 | 22 | 23 | 24 | 25 | 26 | 27 | 28 | 29 | 30 | 31 | 32 | 33 | 34 | 35 | 36 | 37 | 38 | 39 | 40 |   |
| 6                                                                        | 1 | 0 | 2 | 0 | 2 | 1 | 0 | 2 | 2 | 2  | 2  | 1  | 1  | 2  | 0  | 0  | 2  | 2  | 0  | 1  | 0  | 2  | 2  | 0  | 2  | 2  | 2  | 0  | 0  | 0  | 0  | 2  | 2  | 0  | 0  | 1  | 1  | 0  | 0  |    |   |
| 4                                                                        | 1 | 1 | 2 | 2 | 2 | 2 | 2 | 2 | 1 | 2  | 1  | 2  | 0  | 0  | 0  | 0  | 1  | 1  | 0  | 0  | 2  | 1  | 0  | 0  | 2  | 2  | 1  | 1  | 2  | 0  | 0  | 2  | 2  | 0  | 2  | 2  | 0  | 2  | 2  |    |   |
| 5                                                                        | 4 | 2 | 0 | 2 | 2 | 2 | 2 | 2 | 2 | 2  | 2  | 1  | 1  | 2  | 2  | 0  | 2  | 1  | 1  | 1  | 1  | 0  | 2  | 2  | 2  | 2  | 2  | 2  | 2  | 2  | 2  | 2  | 2  | 0  | 2  | 1  | 1  | 1  | 0  |    |   |
| 4                                                                        | 4 | 2 | 1 | 0 | 1 | 2 | 1 | 0 | 0 | 2  | 0  | 0  | 1  | 0  | 0  | 0  | 1  | 0  | 1  | 1  | 2  | 1  | 0  | 0  | 2  | 2  | 0  | 0  | 1  | 0  | 2  | 1  | 2  | 1  | 0  | 1  | 1  | 2  | 0  |    |   |
| 1                                                                        | 7 | 2 | 0 | 2 | 2 | 2 | 2 | 2 | 2 | 2  | 2  | 1  | 1  | 0  | 0  | 0  | 2  | 2  | 0  | 0  | 2  | 1  | 0  | 2  | 2  | 2  | 0  | 2  | 0  | 0  | 0  | 0  | 0  | 1  | 0  | 1  | 1  | 0  | 0  |    |   |
| 2                                                                        | 6 | 2 | 0 | 0 | 2 | 2 | 2 | 2 | 2 | 2  | 2  | 2  | 2  | 1  | 2  | 0  | 2  | 1  | 0  | 0  | 2  | 1  | 0  | 0  | 1  | 1  | 0  | 0  | 2  | 2  | 2  | 0  | 0  | 0  | 0  | 0  | 1  | 2  | 0  |    |   |
| 2                                                                        | 6 | 2 | 2 | 2 | 2 | 2 | 2 | 1 | 2 | 2  | 2  | 2  | 1  | 1  | 0  | 1  | 0  | 2  | 1  | 0  | 0  | 2  | 1  | 0  | 2  | 1  | 1  | 1  | 0  | 1  | 0  | 1  | 1  | 2  | 2  | 0  | 0  | 0  | 0  |    |   |
| 4                                                                        | 1 | 0 | 2 | 2 | 2 | 2 | 2 | 2 | 0 | 2  | 2  | 2  | 1  | 1  | 0  | 0  | 1  | 2  | 2  | 2  | 1  | 0  | 1  | 2  | 2  | 2  | 1  | 2  | 2  | 0  | 0  | 2  | 0  | 2  | 0  | 2  | 1  | 1  | 2  | 2  |   |
| 2                                                                        | 6 | 0 | 2 | 2 | 2 | 2 | 2 | 2 | 1 | 0  | 2  | 2  | 2  | 1  | 0  | 2  | 0  | 2  | 0  | 1  | 0  | 2  | 0  | 0  | 0  | 1  | 1  | 1  | 0  | 2  | 2  | 0  | 2  | 2  | 1  | 1  | 1  | 1  | 0  |    |   |
| 4                                                                        | 6 | 0 | 2 | 2 | 2 | 2 | 2 | 0 | 0 | 2  | 0  | 0  | 2  | 1  | 0  | 2  | 0  | 2  | 0  | 0  | 2  | 1  | 0  | 0  | 0  | 0  | 1  | 1  | 0  | 2  | 0  | 2  | 2  | 1  | 1  | 1  | 1  | 1  | 2  | 0  |   |
| 6                                                                        | 4 | 2 | 2 | 1 | 2 | 2 | 2 | 0 | 0 | 2  | 1  | 1  | 2  | 1  | 0  | 1  | 0  | 2  | 1  | 1  | 0  | 2  | 0  | 2  | 1  | 1  | 1  | 2  | 2  | 1  | 0  | 2  | 2  | 0  | 2  | 2  | 1  | 1  | 0  | 0  |   |
| 7                                                                        | 1 | 1 | 1 | 0 | 2 | 2 | 2 | 2 | 0 | 0  | 2  | 2  | 2  | 2  | 2  | 0  | 1  | 0  | 0  | 1  | 0  | 0  | 1  | 0  | 0  | 2  | 2  | 0  | 0  | 2  | 0  | 2  | 1  | 2  | 0  | 0  | 1  | 1  | 0  | 2  |   |
| 2                                                                        | 7 | 0 | 2 | 2 | 1 | 2 | 2 | 0 | 1 | 2  | 2  | 2  | 1  | 0  | 0  | 2  | 1  | 2  | 0  | 0  | 2  | 2  | 0  | 2  | 2  | 2  | 1  | 2  | 2  | 2  | 0  | 2  | 0  | 2  | 0  | 2  | 0  | 1  | 0  | 0  |   |
| 6                                                                        | 4 | 2 | 2 | 2 | 2 | 2 | 2 | 2 | 2 | 2  | 2  | 1  | 1  | 1  | 2  | 1  | 0  | 2  | 1  | 0  | 2  | 0  | 0  | 2  | 2  | 2  | 2  | 0  | 1  | 0  | 0  | 2  | 2  | 1  | 1  | 1  | 1  | 1  | 2  | 1  |   |
| 4                                                                        | 3 | 2 | 2 | 0 | 1 | 2 | 2 | 2 | 2 | 2  | 2  | 2  | 2  | 0  | 1  | 0  | 0  | 2  | 2  | 0  | 0  | 1  | 0  | 0  | 2  | 2  | 2  | 2  | 1  | 2  | 2  | 0  | 1  | 1  | 0  | 2  | 2  | 2  | 2  | 0  |   |
| 1                                                                        | 2 | 2 | 2 | 2 | 2 | 2 | 2 | 2 | 2 | 2  | 2  | 2  | 1  | 1  | 1  | 0  | 0  | 2  | 2  | 1  | 1  | 1  | 3  | 2  | 2  | 2  | 2  | 1  | 0  | 2  | 0  | 1  | 1  | 2  | 0  | 1  | 1  | 0  | 1  | 0  |   |
| 4                                                                        | 6 | 1 | 0 | 2 | 2 | 2 | 2 | 2 | 0 | 2  | 2  | 2  | 1  | 2  | 1  | 1  | 0  | 0  | 1  | 0  | 0  | 1  | 0  | 1  | 1  | 1  | 2  | 2  | 2  | 0  | 0  | 2  | 0  | 1  | 0  | 0  | 2  | 2  | 2  | 0  |   |
| 4                                                                        | 3 | 1 | 1 | 1 | 1 | 2 | 2 | 1 | 2 | 2  | 2  | 2  | 2  | 2  | 0  | 2  | 0  | 2  | 0  | 2  | 1  | 1  | 2  | 2  | 2  | 2  | 2  | 2  | 0  | 2  | 2  | 0  | 2  | 2  | 0  | 1  | 2  | 2  | 2  | 0  |   |
| 4                                                                        | 3 | 0 | 1 | 1 | 1 | 2 | 1 | 0 | 2 | 2  | 1  | 0  | 2  | 1  | 0  | 0  | 0  | 2  | 1  | 2  | 0  | 0  | 0  | 0  | 2  | 2  | 0  | 0  | 0  | 1  | 0  | 2  | 0  | 0  | 2  | 1  | 2  | 2  | 2  | 0  |   |
| 1                                                                        | 3 | 1 | 0 | 2 | 1 | 2 | 1 | 0 | 0 | 0  | 0  | 0  | 0  | 1  | 1  | 0  | 0  | 2  | 0  | 1  | 0  | 0  | 2  | 0  | 0  | 0  | 0  | 0  | 1  | 0  | 2  | 0  | 0  | 1  | 0  | 2  | 2  | 0  | 0  |    |   |
| 7                                                                        | 2 | 1 | 0 | 2 | 1 | 2 | 2 | 2 | 0 | 2  | 2  | 2  | 1  | 2  | 1  | 0  | 0  | 2  | 0  | 1  | 2  | 2  | 1  | 0  | 0  | 0  | 2  | 2  | 0  | 1  | 2  | 1  | 0  | 2  | 0  | 1  | 1  | 0  | 1  | 0  |   |
| 5                                                                        | 4 | 1 | 0 | 0 | 1 | 1 | 1 | 1 | 1 | 0  | 0  | 1  | 2  | 0  | 1  | 0  | 2  | 0  | 0  | 0  | 0  | 2  | 1  | 0  | 0  | 1  | 1  | 0  | 0  | 0  | 0  | 1  | 0  | 0  | 0  | 2  | 2  | 1  | 0  | 0  |   |
| 6                                                                        | 1 | 0 | 1 | 2 | 2 | 2 | 2 | 2 | 2 | 2  | 2  | 1  | 2  | 0  | 1  | 2  | 0  | 0  | 1  | 1  | 0  | 1  | 2  | 0  | 2  | 2  | 2  | 2  | 0  | 0  | 0  | 2  | 1  | 2  | 1  | 0  | 1  | 1  | 0  | 2  |   |
| 1                                                                        | 6 | 1 | 0 | 0 | 0 | 0 | 0 | 0 | 0 | 1  | 2  | 2  | 2  | 1  | 2  | 0  | 0  | 1  | 0  | 0  | 1  | 0  | 0  | 1  | 2  | 0  | 2  | 2  | 0  | 0  | 0  | 0  | 2  | 1  | 0  | 0  | 1  | 1  | 0  | 2  |   |
| 5                                                                        | 6 | 2 | 1 | 1 | 1 | 1 | 1 | 2 | 1 | 2  | 0  | 2  | 1  | 2  | 0  | 0  | 2  | 1  | 0  | 1  | 1  | 0  | 0  | 2  | 2  | 0  | 2  | 2  | 0  | 1  | 2  | 2  | 0  | 1  | 2  | 2  | 1  | 1  | 2  | 0  |   |
| 4                                                                        | 3 | 2 | 1 | 2 | 1 | 2 | 1 | 2 | 1 | 1  | 2  | 2  | 2  | 2  | 0  | 2  | 0  | 2  | 1  | 0  | 1  | 2  | 0  | 2  | 1  | 1  | 0  | 2  | 2  | 0  | 0  | 2  | 2  | 0  | 0  | 2  | 2  | 2  | 2  | 0  |   |
| 5                                                                        | 6 | 2 | 2 | 2 | 2 | 2 | 2 | 2 | 2 | 2  | 2  | 2  | 1  | 1  | 1  | 0  | 0  | 2  | 2  | 1  | 1  | 3  | 2  | 2  | 2  | 2  | 2  | 1  | 0  | 2  | 0  | 1  | 1  | 2  | 0  | 1  | 1  | 0  | 1  | 0  |   |
| 4                                                                        | 3 | 1 | 0 | 2 | 2 | 2 | 2 | 2 | 0 | 2  | 2  | 2  | 1  | 2  | 1  | 1  | 0  | 0  | 1  | 0  | 0  | 1  | 0  | 1  | 1  | 1  | 2  | 2  | 0  | 0  | 2  | 0  | 1  | 0  | 0  | 2  | 0  | 1  | 0  | 0  |   |
| 4                                                                        | 3 | 1 | 1 | 1 | 1 | 2 | 2 | 1 | 2 | 2  | 2  | 2  | 2  | 2  | 0  | 2  | 0  | 2  | 0  | 2  | 1  | 1  | 2  | 2  | 2  | 2  | 2  | 2  | 0  | 2  | 2  | 0  | 2  | 2  | 0  | 1  | 2  | 2  | 2  | 0  |   |
| 4                                                                        | 3 | 0 | 1 | 1 | 1 | 2 | 1 | 0 | 2 | 2  | 1  | 0  | 2  | 1  | 0  | 0  | 0  | 2  | 1  | 2  | 0  | 0  | 0  | 0  | 0  | 2  | 2  | 0  | 0  | 1  | 0  | 2  | 0  | 0  | 2  | 1  | 2  | 2  | 0  | 0  |   |
| 1                                                                        | 3 | 1 | 0 | 2 | 1 | 2 | 2 | 2 | 0 | 2  | 2  | 2  | 1  | 2  | 1  | 0  | 0  | 2  | 0  | 1  | 2  | 2  | 1  | 0  | 0  | 0  | 2  | 2  | 0  | 1  | 2  | 1  | 0  | 2  | 0  | 1  | 1  | 0  | 1  | 0  |   |
| 5                                                                        | 4 | 1 | 0 | 0 | 1 | 1 | 1 | 1 | 1 | 0  | 0  | 1  | 2  | 0  | 1  | 0  | 2  | 0  | 0  | 0  | 0  | 2  | 1  | 0  | 0  | 1  | 1  | 0  | 0  | 0  | 0  | 1  | 0  | 0  | 0  | 2  | 2  | 1  | 0  | 0  |   |
| 6                                                                        | 1 | 0 | 1 | 2 | 2 | 2 | 2 | 2 | 2 | 2  | 2  | 1  | 2  | 0  | 1  | 2  | 0  | 0  | 1  | 1  | 0  | 1  | 2  | 0  | 2  | 2  | 2  | 2  | 0  | 0  | 0  | 2  | 1  | 2  | 1  | 0  | 1  | 1  | 0  | 2  |   |
| 1                                                                        | 6 | 0 | 1 | 2 | 2 | 2 | 2 | 2 | 2 | 2  | 2  | 2  | 1  | 1  | 1  | 0  | 0  | 1  | 0  | 0  | 1  | 0  | 0  | 1  | 2  | 2  | 2  | 2  | 0  | 0  | 0  | 2  | 1  | 2  | 0  | 0  | 1  | 1  | 0  | 2  |   |
| 5                                                                        | 6 | 2 | 0 | 0 | 2 | 2 | 2 | 2 | 0 | 0  | 1  | 2  | 2  | 2  | 1  | 0  | 0  | 2  | 1  | 0  | 0  | 1  | 0  | 0  | 1  | 1  | 0  | 2  | 2  | 0  | 0  | 2  | 2  | 0  | 1  | 0  | 0  | 2  | 2  | 0  |   |
| 4                                                                        | 3 | 2 | 1 | 2 | 2 | 2 | 2 | 2 | 2 | 2  | 2  | 2  | 1  | 1  | 1  | 0  | 0  | 2  | 2  | 1  | 1  | 2  | 2  | 2  | 2  | 2  | 2  | 2  | 0  | 0  | 2  | 2  | 0  | 2  | 2  | 1  | 1  | 1  | 2  | 0  |   |
| 5                                                                        | 6 | 2 | 2 | 2 | 2 | 2 | 2 | 2 | 2 | 2  | 2  | 2  | 1  | 1  | 1  | 0  | 0  | 2  | 2  | 1  | 1  | 2  | 2  | 2  | 2  | 2  | 2  | 2  | 0  | 0  | 2  | 2  | 0  | 2  | 2  | 0  | 0  | 1  | 1  | 2  | 0 |
| 4                                                                        | 3 | 2 | 2 | 2 | 2 | 2 | 2 | 2 | 2 | 2  | 2  | 2  | 1  | 1  | 1  | 0  | 0  | 2  | 2  | 1  | 1  | 2  | 2  | 2  | 2  | 2  | 2  | 2  | 0  | 0  | 2  | 2  | 0  | 2  | 2  | 0  | 0  | 1  | 1  | 2  | 0 |
| 5                                                                        | 6 | 2 | 2 | 2 | 2 | 2 | 2 | 2 | 2 | 2  | 2  | 2  | 1  | 1  | 1  | 0  | 0  | 2  | 2  | 1  | 1  | 2  | 2  | 2  | 2  | 2  | 2  | 2  | 0  | 0  | 2  | 2  | 0  | 2  | 2  | 0  | 0  | 1  | 1  | 2  | 0 |
| 4                                                                        | 3 | 1 | 1 | 2 | 2 | 2 | 2 | 2 | 2 | 2  | 2  | 2  | 1  | 1  | 1  | 0  | 0  | 2  | 2  | 1  | 1  | 2  | 2  | 2  | 2  | 2  | 2  | 2  | 0  | 0  | 2  | 2  | 0  | 2  | 2  | 0  | 0  | 1  | 1  | 2  | 0 |
| 5                                                                        | 1 | 1 | 0 | 2 | 2 | 2 | 2 | 2 | 2 | 2  | 2  | 2  | 1  | 1  | 1  | 0  | 0  | 2  | 2  | 1  | 1  | 2  | 2  | 2  | 2  | 2  | 2  | 2  | 0  | 0  | 2  | 2  | 0  | 2  | 2  | 0  | 0  | 1  | 1  | 1  | 0 |
| 4                                                                        | 2 | 1 | 0 | 2 | 0 | 2 | 2 | 2 | 1 | 2  | 2  | 2  | 2  | 2  | 1  | 0  | 0  | 2  | 2  | 0  | 0  | 1  | 2  | 2  | 2  | 2  | 2  | 2  | 0  | 0  | 1  | 0  | 2  | 2  | 1  | 2  | 2  | 1  | 1  | 2  | 0 |
| 5                                                                        | 1 | 1 | 0 | 2 | 0 | 2 | 2 | 2 | 2 | 2  | 2  | 2  | 2  | 2  | 1  | 0  | 0  | 2  | 2  | 0  | 0  | 1  | 2  | 2  | 2  | 2  | 2  | 2  | 0  | 0  | 1  | 0  | 2  | 2  | 0  | 1  | 1  | 1  | 1  | 2  | 0 |
| 1                                                                        | 1 | 1 | 2 | 2 | 2 | 2 | 2 | 2 | 0 | 2  | 1  | 1  | 1  | 1  | 0  | 1  | 0  | 1  | 0  | 1  | 1  | 0  | 0  | 2  | 0  | 0  | 2  | 2  | 0  | 2  | 2  | 0  | 2  | 2  | 0  | 1  | 1  | 1  | 0  | 2  | 0 |
| 5                                                                        | 1 | 1 | 0 | 2 | 2 | 2 | 2 | 2 | 1 | 2  | 2  | 2  | 2  | 2  | 1  | 0  | 0  | 2  | 2  | 0  | 0  | 1  | 2  | 2  | 2  | 2  | 2  | 2  | 0  | 0  | 2  | 2  | 0  | 2  | 2  | 0  | 1  | 1  | 1  | 2  | 0 |
| 6                                                                        | 1 | 1 | 2 | 2 | 2 | 2 | 2 | 2 | 2 | 2  | 2  | 2  | 1  | 1  | 1  | 0  | 0  | 2  | 2  | 1  | 1  | 2  | 2  | 2  | 2  | 2  | 2  | 2  | 0  | 0  | 2  | 2  | 0  | 2  | 2  | 0  | 1  | 1  | 1  | 0  | 2 |
| 5                                                                        | 1 | 1 | 0 | 2 | 2 | 2 | 2 | 2 | 2 | 2  | 2  | 2  | 1  | 1  | 1  | 0  | 0  | 2  | 2  | 0  | 0  | 1  | 2  | 2  | 2  | 2  | 2  | 2  | 0  | 0  | 2  | 2  | 0  | 2  | 2  |    |    |    |    |    |   |

**SURVEY SCORE (PRE)**

**CLINICAL CASES - PARTICIPANTS' ANSWERS (POST-WORKSHOP)**

|    | 1 | 2 | 3 | 4 | 5 | 6 | 7 | 8 | 9 | 10 | 11 | 12 | 13 | 14 | 15 | 16 | 17 | 18 | 19 | 20 | 21 | 22 | 23 | 24 | 25 | 26 | 27 | 28 | 29 | 30 | 31 | 32 | 33 | 34 | 35 | 36 | 37 | 38 |   |   |
|----|---|---|---|---|---|---|---|---|---|----|----|----|----|----|----|----|----|----|----|----|----|----|----|----|----|----|----|----|----|----|----|----|----|----|----|----|----|----|---|---|
| 39 | 7 | 6 | 7 | 7 | 7 | 6 | 6 | 7 | 7 | 7  | 7  | 7  | 6  | 1  | 7  | 4  | 7  | 7  | 1  | 5  | 7  | 7  | 3  | 1  | 7  | 7  | 3  | 2  | 2  | 7  | 6  | 7  | 1  | 4  | 2  | 3  | 7  | 7  |   |   |
| 45 | 7 | 6 | 7 | 7 | 7 | 7 | 7 | 7 | 7 | 7  | 7  | 7  | 7  | 7  | 7  | 7  | 7  | 7  | 7  | 7  | 7  | 7  | 7  | 7  | 7  | 7  | 7  | 7  | 7  | 7  | 7  | 7  | 7  | 7  | 7  | 7  | 7  | 7  |   |   |
| 58 | 7 | 7 | 7 | 7 | 7 | 7 | 7 | 7 | 7 | 7  | 7  | 7  | 7  | 7  | 7  | 7  | 7  | 7  | 7  | 7  | 7  | 7  | 7  | 7  | 7  | 7  | 7  | 7  | 7  | 7  | 7  | 7  | 7  | 7  | 7  | 7  | 7  | 7  |   |   |
| 31 | 7 | 7 | 7 | 6 | 7 | 6 | 4 | 5 | 7 | 5  | 6  | 5  | 6  | 1  | 7  | 3  | 5  | 7  | 2  | 5  | 6  | 7  | 4  | 3  | 7  | 7  | 5  | 5  | 4  | 3  | 4  | 7  | 1  | 1  | 7  | 6  | 6  | 7  |   |   |
| 42 | 7 | 7 | 7 | 7 | 7 | 7 | 7 | 7 | 7 | 7  | 7  | 7  | 7  | 7  | 7  | 7  | 7  | 7  | 7  | 7  | 7  | 7  | 7  | 7  | 7  | 7  | 7  | 7  | 7  | 7  | 7  | 7  | 7  | 7  | 7  | 7  | 7  | 7  |   |   |
| 36 | 7 | 7 | 7 | 7 | 7 | 7 | 7 | 7 | 7 | 7  | 7  | 7  | 7  | 7  | 7  | 7  | 7  | 7  | 7  | 7  | 7  | 7  | 7  | 7  | 7  | 7  | 7  | 7  | 7  | 7  | 7  | 7  | 7  | 7  | 7  | 7  | 7  | 7  |   |   |
| 44 | 7 | 7 | 7 | 6 | 7 | 6 | 4 | 6 | 7 | 7  | 7  | 6  | 5  | 7  | 7  | 6  | 6  | 7  | 5  | 4  | 7  | 7  | 6  | 3  | 7  | 7  | 1  | 3  | 1  | 6  | 1  | 5  | 2  | 7  | 7  | 6  | 7  | 7  |   |   |
| 52 | 6 | 7 | 6 | 1 | 7 | 5 | 1 | 6 | 7 | 6  | 6  | 6  | 6  | 1  | 7  | 7  | 2  | 7  | 4  | 2  | 1  | 7  | 3  | 1  | 7  | 7  | 1  | 1  | 1  | 4  | 1  | 6  | 1  | 1  | 6  | 6  | 6  | 7  |   |   |
| 46 | 6 | 7 | 6 | 7 | 7 | 4 | 6 | 6 | 7 | 7  | 7  | 4  | 6  | 7  | 7  | 6  | 6  | 7  | 4  | 3  | 7  | 7  | 2  | 1  | 7  | 7  | 1  | 2  | 1  | 7  | 4  | 7  | 1  | 7  | 6  | 6  | 7  | 7  |   |   |
| 35 | 7 | 7 | 7 | 6 | 6 | 7 | 6 | 6 | 6 | 6  | 7  | 7  | 6  | 6  | 7  | 6  | 6  | 7  | 5  | 6  | 6  | 7  | 5  | 6  | 4  | 5  | 6  | 5  | 7  | 6  | 6  | 7  | 1  | 1  | 1  | 6  | 5  | 6  | 7 |   |
| 45 | 7 | 7 | 7 | 7 | 7 | 7 | 6 | 6 | 7 | 7  | 7  | 7  | 7  | 1  | 7  | 7  | 6  | 7  | 5  | 5  | 5  | 7  | 1  | 1  | 7  | 7  | 1  | 1  | 4  | 4  | 6  | 2  | 7  | 7  | 6  | 7  | 7  | 7  |   |   |
| 36 | 7 | 7 | 7 | 7 | 7 | 7 | 4 | 6 | 7 | 7  | 7  | 7  | 7  | 4  | 7  | 6  | 7  | 6  | 4  | 5  | 5  | 6  | 4  | 5  | 6  | 5  | 6  | 4  | 5  | 6  | 5  | 7  | 6  | 6  | 7  | 1  | 2  | 1  | 7 | 7 |
| 46 | 7 | 7 | 7 | 7 | 6 | 6 | 6 | 6 | 6 | 7  | 7  | 4  | 2  | 7  | 6  | 6  | 7  | 4  | 4  | 2  | 5  | 2  | 2  | 7  | 7  | 2  | 3  | 1  | 5  | 6  | 4  | 2  | 6  | 4  | 2  | 6  | 4  | 7  | 7 |   |
| 52 | 7 | 7 | 7 | 7 | 7 | 7 | 7 | 7 | 7 | 7  | 6  | 6  | 4  | 1  | 7  | 3  | 6  | 6  | 3  | 5  | 5  | 7  | 4  | 2  | 6  | 5  | 1  | 2  | 1  | 5  | 5  | 7  | 1  | 1  | 5  | 5  | 5  | 5  | 5 |   |
| 44 | 5 | 7 | 6 | 5 | 6 | 4 | 4 | 5 | 7 | 7  | 7  | 2  | 3  | 7  | 4  | 4  | 7  | 4  | 2  | 4  | 7  | 1  | 1  | 7  | 7  | 1  | 5  | 1  | 3  | 7  | 7  | 1  | 1  | 2  | 5  | 6  | 6  | 6  |   |   |
| 53 | 7 | 7 | 7 | 7 | 7 | 7 | 7 | 7 | 7 | 7  | 6  | 6  | 7  | 1  | 7  | 4  | 5  | 7  | 2  | 4  | 5  | 7  | 1  | 2  | 7  | 7  | 3  | 5  | 2  | 5  | 6  | 7  | 6  | 2  | 6  | 6  | 7  | 7  |   |   |
| 42 | 7 | 7 | 7 | 7 | 7 | 7 | 7 | 7 | 7 | 7  | 7  | 7  | 7  | 7  | 7  | 7  | 7  | 7  | 7  | 7  | 7  | 7  | 7  | 7  | 7  | 7  | 7  | 7  | 7  | 7  | 7  | 7  | 7  | 7  | 7  | 7  | 7  | 7  |   |   |
| 53 | 6 | 6 | 4 | 6 | 7 | 7 | 6 | 7 | 7 | 7  | 7  | 6  | 6  | 1  | 7  | 1  | 6  | 7  | 6  | 4  | 3  | 7  | 3  | 6  | 7  | 2  | 6  | 1  | 5  | 6  | 7  | 2  | 2  | 1  | 6  | 6  | 6  | 6  | 6 |   |
| 38 | 6 | 6 | 4 | 7 | 7 | 6 | 7 | 7 | 7 | 7  | 7  | 7  | 7  | 1  | 7  | 1  | 2  | 7  | 7  | 4  | 1  | 7  | 1  | 2  | 6  | 7  | 2  | 1  | 1  | 7  | 6  | 7  | 1  | 6  | 7  | 6  | 6  | 7  |   |   |
| 26 | 5 | 5 | 6 | 6 | 6 | 6 | 4 | 5 | 6 | 6  | 7  | 7  | 3  | 2  | 3  | 7  | 3  | 7  | 5  | 4  | 5  | 4  | 2  | 6  | 6  | 6  | 5  | 5  | 3  | 2  | 3  | 3  | 6  | 1  | 5  | 6  | 6  | 6  |   |   |
| 44 | 4 | 7 | 7 | 6 | 7 | 7 | 6 | 5 | 7 | 7  | 7  | 7  | 7  | 1  | 7  | 5  | 5  | 7  | 6  | 6  | 2  | 7  | 5  | 1  | 7  | 7  | 5  | 6  | 1  | 2  | 6  | 7  | 1  | 1  | 6  | 7  | 6  | 6  | 7 |   |
| 23 | 7 | 7 | 6 | 7 | 7 | 6 | 7 | 7 | 7 | 7  | 7  | 7  | 7  | 1  | 7  | 3  | 4  | 7  | 1  | 1  | 5  | 7  | 4  | 1  | 7  | 7  | 1  | 1  | 1  | 7  | 1  | 5  | 1  | 1  | 6  | 6  | 7  | 7  | 7 |   |
| 45 | 4 | 6 | 7 | 5 | 7 | 7 | 7 | 7 | 7 | 7  | 7  | 6  | 1  | 6  | 3  | 7  | 7  | 7  | 5  | 4  | 5  | 7  | 5  | 4  | 5  | 7  | 5  | 1  | 5  | 7  | 7  | 1  | 1  | 7  | 3  | 7  | 7  | 7  |   |   |
| 35 | 5 | 7 | 5 | 5 | 5 | 5 | 5 | 5 | 5 | 5  | 5  | 5  | 5  | 5  | 5  | 5  | 5  | 5  | 5  | 5  | 5  | 5  | 5  | 5  | 5  | 5  | 5  | 5  | 5  | 5  | 5  | 5  | 5  | 5  | 5  | 5  | 5  | 5  |   |   |
| 46 | 7 | 7 | 7 | 7 | 7 | 7 | 6 | 7 | 6 | 6  | 6  | 6  | 7  | 4  | 5  | 5  | 5  | 7  | 6  | 1  | 5  | 5  | 5  | 3  | 1  | 7  | 7  | 3  | 1  | 1  | 7  | 3  | 6  | 1  | 4  | 7  | 7  | 5  | 6 |   |
| 50 | 7 | 7 | 7 | 7 | 7 | 7 | 7 | 7 | 7 | 7  | 7  | 6  | 4  | 3  | 5  | 5  | 6  | 7  | 3  | 5  | 6  | 6  | 3  | 1  | 7  | 7  | 3  | 1  | 1  | 7  | 4  | 7  | 1  | 1  | 6  | 6  | 5  | 6  |   |   |
| 48 | 7 | 7 | 7 | 7 | 7 | 7 | 4 | 3 | 7 | 6  | 6  | 1  | 1  | 7  | 7  | 5  | 6  | 5  | 6  | 6  | 6  | 6  | 1  | 1  | 7  | 7  | 4  | 2  | 1  | 7  | 1  | 7  | 1  | 7  | 1  | 7  | 1  | 7  | 7 |   |
| 50 | 7 | 7 | 7 | 7 | 7 | 7 | 7 | 7 | 7 | 7  | 7  | 7  | 7  | 7  | 7  | 7  | 7  | 7  | 7  | 7  | 7  | 7  | 7  | 7  | 7  | 7  | 7  | 7  | 7  | 7  | 7  | 7  | 7  | 7  | 7  | 7  | 7  | 7  | 7 |   |
| 47 | 7 | 7 | 6 | 7 | 7 | 6 | 7 | 7 | 7 | 7  | 7  | 6  | 6  | 1  | 7  | 4  | 7  | 7  | 6  | 7  | 1  | 4  | 6  | 7  | 3  | 3  | 6  | 7  | 2  | 6  | 1  | 5  | 6  | 7  | 2  | 1  | 6  | 6  | 6 |   |
| 39 | 6 | 6 | 7 | 6 | 7 | 4 | 6 | 7 | 7 | 6  | 6  | 6  | 3  | 7  | 7  | 5  | 7  | 6  | 6  | 5  | 6  | 3  | 2  | 7  | 7  | 1  | 2  | 1  | 7  | 3  | 7  | 4  | 1  | 3  | 3  | 7  | 7  | 7  |   |   |
| 47 | 6 | 6 | 7 | 6 | 7 | 6 | 7 | 6 | 7 | 6  | 6  | 6  | 6  | 3  | 7  | 7  | 6  | 7  | 6  | 7  | 6  | 7  | 6  | 7  | 7  | 1  | 7  | 1  | 7  | 1  | 7  | 1  | 7  | 1  | 7  | 1  | 7  | 7  |   |   |
| 29 | 7 | 7 | 7 | 7 | 7 | 6 | 6 | 7 | 7 | 7  | 6  | 5  | 3  | 7  | 7  | 2  | 7  | 1  | 4  | 5  | 7  | 2  | 1  | 7  | 7  | 1  | 2  | 1  | 1  | 4  | 7  | 2  | 1  | 6  | 6  | 7  | 7  | 7  |   |   |
| 33 | 5 | 6 | 6 | 6 | 6 | 6 | 6 | 6 | 6 | 7  | 5  | 7  | 6  | 2  | 4  | 7  | 4  | 4  | 6  | 4  | 6  | 4  | 6  | 3  | 5  | 5  | 4  | 1  | 2  | 4  | 6  | 6  | 5  | 2  | 2  | 2  | 5  | 5  |   |   |
| 35 | 7 | 7 | 7 | 7 | 7 | 7 | 6 | 7 | 7 | 7  | 7  | 5  | 1  | 1  | 7  | 4  | 6  | 7  | 4  | 4  | 2  | 7  | 4  | 1  | 7  | 7  | 1  | 1  | 1  | 1  | 7  | 1  | 1  | 7  | 1  | 7  | 7  | 7  | 7 |   |
| 46 | 7 | 6 | 6 | 6 | 6 | 6 | 4 | 6 | 7 | 6  | 7  | 6  | 2  | 7  | 6  | 5  | 6  | 4  | 4  | 5  | 6  | 4  | 4  | 1  | 7  | 6  | 3  | 5  | 4  | 4  | 6  | 4  | 6  | 4  | 6  | 7  | 5  | 5  |   |   |
| 39 | 5 | 6 | 7 | 7 | 6 | 7 | 6 | 7 | 7 | 7  | 7  | 1  | 1  | 7  | 1  | 5  | 7  | 4  | 4  | 5  | 7  | 4  | 4  | 5  | 7  | 4  | 4  | 7  | 5  | 4  | 4  | 4  | 1  | 7  | 7  | 4  | 4  | 6  | 7 |   |
| 58 | 7 | 7 | 4 | 4 | 7 | 7 | 4 | 7 | 7 | 4  | 7  | 6  | 5  | 6  | 7  | 4  | 5  | 7  | 4  | 4  | 5  | 7  | 4  | 4  | 7  | 5  | 4  | 4  | 4  | 4  | 1  | 7  | 7  | 4  | 4  | 7  | 1  | 4  | 6 |   |
| 49 | 7 | 7 | 7 | 7 | 7 | 7 | 7 | 7 | 7 | 7  | 7  | 7  | 7  | 7  | 7  | 7  | 7  | 7  | 7  | 7  | 7  | 7  | 7  | 7  | 7  | 7  | 7  | 7  | 7  | 7  | 7  | 7  | 7  | 7  | 7  | 7  | 7  | 7  | 7 |   |
| 39 | 7 | 6 | 7 | 7 | 7 | 7 | 7 | 7 | 7 | 7  | 7  | 7  | 7  | 1  | 7  | 7  | 2  | 7  | 7  | 2  | 7  | 7  | 2  | 7  | 7  | 1  | 1  | 7  | 7  | 1  | 1  | 7  | 5  | 7  | 1  | 6  | 7  | 7  |   |   |
| 36 | 7 | 7 | 7 | 6 | 7 | 7 | 7 | 7 | 7 | 7  | 7  | 7  | 7  | 4  | 7  | 4  | 7  | 4  | 7  | 2  | 5  | 4  | 4  | 4  | 1  | 7  | 7  | 1  | 4  | 4  | 7  | 7  | 4  | 4  | 7  | 7  | 7  | 7  | 7 |   |
| 35 | 5 | 6 | 6 | 5 | 6 | 4 | 4 | 5 | 5 | 7  | 7  | 2  | 3  | 7  | 4  | 4  | 7  | 5  | 1  | 5  | 7  | 2  | 1  | 7  | 7  | 1  | 5  | 1  | 3  | 6  | 6  | 1  | 1  | 2  | 5  | 6  | 6  | 6  |   |   |
| 27 | 7 | 7 | 7 | 6 | 7 | 6 | 4 | 3 | 7 | 7  | 7  | 5  | 4  | 7  | 6  | 4  | 7  | 3  | 6  | 4  | 7  | 3  | 6  | 4  | 7  | 3  | 3  | 3  | 4  | 5  | 7  | 1  | 1  | 6  | 5  | 7  | 7  | 7  |   |   |
| 52 | 6 | 6 | 6 | 7 | 7 | 7 | 7 | 7 | 7 | 6  | 7  | 6  | 7  | 1  | 7  | 7  | 5  | 6  | 2  | 7  | 6  | 7  | 1  | 1  | 7  | 7  | 1  | 1  | 1  | 6  | 7  | 7  | 1  | 7  | 6  | 7  | 7  | 7  |   |   |
| 44 | 7 | 7 | 7 | 7 | 7 | 7 | 4 | 6 | 7 | 7  | 7  | 6  | 5  | 1  | 7  | 1  | 6  | 6  | 2  | 2  | 5  | 6  | 2  | 1  | 7  | 7  | 1  | 1  | 1  | 7  | 1  | 7  | 1  | 7  | 1  | 7  | 7  | 7  | 7 |   |
| 45 | 7 | 4 | 6 | 6 | 3 | 6 | 5 | 5 | 7 | 6  | 7  | 4  | 2  | 7  | 1  | 5  | 7  | 1  | 2  | 4  | 7  | 1  | 1  | 7  | 6  | 4  | 6  | 1  | 4  | 5  | 7  | 1  | 1  | 3  | 4  | 5  | 6  | 7  |   |   |
| 39 | 6 | 6 | 5 | 7 | 6 | 5 | 6 | 7 | 7 | 6  | 7  | 6  | 4  | 2  | 6  | 2  | 3  | 7  | 2  | 4  | 5  | 7  | 3  | 1  | 7  | 7  | 5  | 3  | 2  | 6  | 3  | 5  | 2  | 2  | 6  | 6  | 7  | 7  |   |   |
| 48 | 7 | 5 | 7 | 3 | 7 | 7 | 7 | 7 | 7 | 7  | 7  | 6  | 3  | 7  | 2  | 3  | 7  | 1  | 1  | 2  | 7  | 4  | 3  | 7  | 7  | 3  | 6  | 2  | 7  | 7  | 6  | 2  | 2  | 6  | 6  | 7  | 7  | 7  |   |   |
| 44 | 6 | 7 | 5 | 7 | 7 | 7 | 1 | 5 | 7 | 7  | 7  | 6  | 2  | 1  | 7  | 2  | 1  | 7  | 1  | 2  | 4  | 7  | 1  | 1  | 2  | 3  | 1  | 1  | 1  | 7  | 1  | 1  | 2  | 1  | 7  | 1  | 7  | 7  |   |   |
| 48 | 6 | 5 | 7 | 7 | 7 | 6 | 4 | 7 | 7 | 7  | 7  | 6  | 3  | 7  | 4  | 3  | 7  | 1  | 1  | 2  | 7  | 4  | 3  | 7  | 7  | 3  | 6  | 2  | 7  | 2  | 5  | 2  | 2  | 5  | 1  | 6  | 6  | 7  |   |   |
| 44 | 6 |   |   |   |   |   |   |   |   |    |    |    |    |    |    |    |    |    |    |    |    |    |    |    |    |    |    |    |    |    |    |    |    |    |    |    |    |    |   |   |



|   | SURVEY SCORE (POST) |
|---|---------------------|
| 0 | 47                  |
| 1 | 61                  |
| 0 | 46                  |
| 0 | 46                  |
| 0 | 46                  |
| 0 | 45                  |
| 0 | 46                  |
| 2 | 51                  |
| 0 | 47                  |
| 0 | 37                  |
| 0 | 54                  |
| 0 | 39                  |
| 0 | 43                  |
| 1 | 52                  |
| 0 | 39                  |
| 0 | 55                  |
| 0 | 50                  |
| 2 | 52                  |
| 2 | 53                  |
| 0 | 30                  |
| 0 | 49                  |
| 2 | 55                  |
| 2 | 53                  |
| 0 | 37                  |
| 0 | 46                  |
| 0 | 55                  |
| 0 | 48                  |
| 0 | 51                  |
| 2 | 55                  |
| 2 | 45                  |
| 1 | 54                  |
| 1 | 59                  |
| 0 | 26                  |
| 0 | 61                  |
| 0 | 36                  |
| 0 | 45                  |
| 2 | 41                  |
| 0 | 61                  |
| 2 | 57                  |
| 0 | 51                  |
| 0 | 37                  |
| 0 | 49                  |
| 0 | 40                  |
| 1 | 59                  |
| 2 | 67                  |
| 0 | 40                  |
| 0 | 42                  |
| 2 | 44                  |
| 2 | 46                  |
| 0 | 49                  |
| 1 | 40                  |
| 2 | 48                  |
| 2 | 60                  |
| 0 | 39                  |
| 2 | 50                  |
| 0 | 40                  |
| 0 | 39                  |
| 0 | 58                  |
| 0 | 44                  |
| 2 | 45                  |
| 1 | 54                  |
| 2 | 53                  |
| 0 | 42                  |
| 0 | 43                  |
| 1 | 58                  |
| 0 | 48                  |
| 0 | 47                  |
| 0 | 50                  |
| 2 | 56                  |
| 2 | 66                  |
| 1 | 61                  |
| 0 | 57                  |
| 0 | 44                  |
| 0 | 36                  |
| 0 | 55                  |
| 0 | 56                  |
| 0 | 58                  |
| 0 | 57                  |
| 0 | 58                  |
| 0 | 61                  |
| 0 | 46                  |
| 0 | 59                  |
| 2 | 45                  |
| 0 | 46                  |
| 0 | 49                  |
| 0 | 53                  |
| 0 | 51                  |
| 2 | 52                  |
